# Supplementary material for: Identification of Potential Immunogenic Molecules During the Allogeneic Transplantation of Human Adipose-derived Mesenchymal Stem Cells
Source: Research Square preprint supplement (doi:10.21203/rs.3.rs-105760/v1), 2020-11-17
Supplement: Supplementary file 1 [file 5a3ebd4b69db566464882b50.xlsx]

## Sheet: Sheet1
SampleName	Clone_ID	Clone_Count	Clone_Fraction	N.Seq.CDR3	AA.Seq.CDR3	Best_V_Gene	Best_D_Gene	Best_J_Gene	Chain_Type
1-PBS-alpha	1	96833	0.1098	TGTGTGGTGAGCGACAGAGGCTCAACCCTGGGGAGGCTATACTTT	CVVSDRGSTLGRLYF	TRAV10		TRAJ18	TRA
1-PBS-alpha	2	90594	0.1027	TGTGCTTATAGGAGAGTATACACCGGTAACCAGTTCTATTTT	CAYRRVYTGNQFYF	TRAV38-2/DV8		TRAJ49	TRA
1-PBS-alpha	3	64084	0.0726	TGTGCAGCAACGACCCAGGGCGGATCTGAAAAGCTGGTCTTT	CAATTQGGSEKLVF	TRAV13-1		TRAJ57	TRA
1-PBS-alpha	4	53071	0.0602	TGTGCTGCCGAACTCGATGCAGGCAACATGCTCACCTTT	CAAELDAGNMLTF	TRAV22		TRAJ39	TRA
1-PBS-alpha	5	51003	0.0578	TGCCTCGTGGGCCCAAATAATAATGCAGGCAACATGCTCACCTTT	CLVGPNNNAGNMLTF	TRAV4		TRAJ39	TRA
1-PBS-alpha	6	49412	0.056	TGTGCTGTGTGGGGCTTCAACAAATTTTACTTT	CAVWGFNKFYF	TRAV21		TRAJ21	TRA
1-PBS-alpha	7	44703	0.0507	TGTGCTGTGCAGGCCGGGTACAGCAGTGCTTCCAAGATAATCTTT	CAVQAGYSSASKIIF	TRAV20		TRAJ3	TRA
1-PBS-alpha	8	42393	0.048	TGTGCAATGAGCGACTACAAGCTCAGCTTT	CAMSDYKLSF	TRAV12-3		TRAJ20	TRA
1-PBS-alpha	9	38533	0.0437	TGTGTGGTGAACAGGGGTCCGAAAAGCAGTGCTTCCAAGATAATCTTT	CVVNRGPKSSASKIIF	TRAV12-1		TRAJ3	TRA
1-PBS-alpha	10	36784	0.0417	TGTGCTATACGAGGTGCTGGTGGTACTAGCTATGGAAAGCTGACATTT	CAIRGAGGTSYGKLTF	TRAV27		TRAJ52	TRA
1-PBS-alpha	11	36746	0.0416	TGTGCAATGTGTTTTTCTGGTGGCTACAATAAGCTGATTTTT	CAMCFSGGYNKLIF	TRAV12-3		TRAJ4	TRA
1-PBS-alpha	12	35854	0.0406	TGTGCTGTGAGACCCAATACTGGAGGCTTCAAAACTATCTTT	CAVRPNTGGFKTIF	TRAV3		TRAJ9	TRA
1-PBS-alpha	13	33023	0.0374	TGTGCAATGAGGGGACAGGGAGCCCAGAAGCTGGTATTT	CAMRGQGAQKLVF	TRAV12-3		TRAJ54	TRA
1-PBS-alpha	14	29774	0.0337	TGTGTGGTGTCCGACAGAGGCTCAACCCTGGGGAGGCTATACTTT	CVVSDRGSTLGRLYF	TRAV10		TRAJ18	TRA
1-PBS-alpha	15	29235	0.0331	TGTGCTGTGGATGCCTCAGGAACCTACAAATACATCTTT	CAVDASGTYKYIF	TRAV21		TRAJ40	TRA
1-PBS-alpha	16	28760	0.0326	TGTGCAATGCTAGATAACTATGGTCAGAATTTTGTCTTT	CAMLDNYGQNFVF	TRAV14/DV4		TRAJ26	TRA
1-PBS-alpha	17	27776	0.0315	TGTGCAATAGGAGATAACAATGCCAGACTCATGTTT	CAIGDNNARLMF	TRAV12-3		TRAJ31	TRA
1-PBS-alpha	18	24553	0.0278	TGTGCTGCCCGATCTTATAACACCGACAAGCTCATCTTT	CAARSYNTDKLIF	TRAV21		TRAJ34	TRA
1-PBS-alpha	19	15925	0.018	TGTGCAATGAAAAACCAGGGAGGAAAGCTTATCTTC	CAMKNQGGKLIF	TRAV12-3		TRAJ23	TRA
1-PBS-alpha	20	15160	0.0172	TGTGTGGTGAAGGGGGGGCGAGGAAACAAGCTGGTCTTT	CVVKGGRGNKLVF	TRAV12-1		TRAJ47	TRA
1-PBS-alpha	21	14928	0.0169	TGTGCCGTACATGGCTCTAGCAACACAGGCAAACTAATCTTT	CAVHGSSNTGKLIF	TRAV12-2		TRAJ37	TRA
1-PBS-alpha	22	14324	0.0162	TGTGCTCTGAGAGAAGGAGGCCAGGGAGGAAAGCTTATCTTC	CALREGGQGGKLIF	TRAV9-2		TRAJ23	TRA
1-PBS-alpha	23	7631	0.0086	TGTGCCGGGGAGGATGGTCAGAATTTTGTCTTT	CAGEDGQNFVF	TRAV3		TRAJ26	TRA
1-PBS-alpha	24	39	0	TGTGCTCTGAGTGATCTCAACAATAACAATGACATGCGCTTT	CALSDLNNNNDMRF	TRAV9-2		TRAJ43	TRA
1-PBS-alpha	25	38	0	TGTGCCCAGAAGCCCCGAACCGGCACTGCCAGTAAACTCACCTTT	CAQKPRTGTASKLTF	TRAV13-2		TRAJ44	TRA
1-PBS-alpha	26	36	0	TGTGCAGCAAGGGACAATGCTGGTGGTACTAGCTATGGAAAGCTGACATTT	CAARDNAGGTSYGKLTF	TRAV29/DV5		TRAJ52	TRA
1-PBS-alpha	27	36	0	TGTGCAGAGAATAGCTTAGATTCGTACAGCAGTGCTTCCAAGATAATCTTT	CAENSLDSYSSASKIIF	TRAV13-2		TRAJ3	TRA
1-PBS-alpha	28	35	0	TGTGCTCTTGGGGACCCGATGGATAGCAGCTATAAATTGATCTTC	CALGDPMDSSYKLIF	TRAV38-2/DV8		TRAJ12	TRA
1-PBS-alpha	29	34	0	TGTGCAGGAGCGGATCAGGGAGCCCAGAAGCTGGTATTT	CAGADQGAQKLVF	TRAV27		TRAJ54	TRA
1-PBS-alpha	30	34	0	TGTGCAGAGAGTAATTCTGGGGGTTACCAGAAAGTTACCTTT	CAESNSGGYQKVTF	TRAV5		TRAJ13	TRA
1-PBS-alpha	31	34	0	TGTGCAATGAGCGCGGTTACCAGTGGCTCTAGGTTGACCTTT	CAMSAVTSGSRLTF	TRAV12-3		TRAJ58	TRA
1-PBS-alpha	32	29	0	TGCCTCGTGGATAATAATAATGCAGGCAACATGCTCACCTTT	CLVDNNNAGNMLTF	TRAV4		TRAJ39	TRA
1-PBS-alpha	33	27	0	TGTGCAGAGAGTATGGCCAACCAGGCAGGAACTGCTCTGATCTTT	CAESMANQAGTALIF	TRAV5		TRAJ15	TRA
1-PBS-alpha	34	26	0	TGTGCAGAGATGGGCTATGGTGGTGCTACAAACAAGCTCATCTTT	CAEMGYGGATNKLIF	TRAV13-2		TRAJ32	TRA
1-PBS-alpha	35	26	0	TGTGCTGTCGCGCCGAACACCGGTAACCAGTTCTATTTT	CAVAPNTGNQFYF	TRAV41		TRAJ49	TRA
1-PBS-alpha	36	23	0	TGTGCAGAGATTCTACTTTCAGGAAACACACCTCTTGTCTTT	CAEILLSGNTPLVF	TRAV5		TRAJ29	TRA
1-PBS-alpha	37	21	0	TGTGCAGAGAATATAAGCCAGGCAGGAACTGCTCTGATCTTT	CAENISQAGTALIF	TRAV13-2		TRAJ15	TRA
1-PBS-alpha	38	21	0	TGTGCTGTGAGACCTGGTATGGATAGCAACTATCAGTTAATCTGG	CAVRPGMDSNYQLIW	TRAV21		TRAJ33	TRA
1-PBS-alpha	39	19	0	TGTGCAGCACGTAGAGGATACAGCACCCTCACCTTT	CAARRGYSTLTF	TRAV13-1		TRAJ11	TRA
1-PBS-alpha	40	18	0	TGTGCAGAGAACCCCAGGGGCGGCAACATGCTCACCTTT	CAENPRGGNMLTF	TRAV13-2		TRAJ39	TRA
1-PBS-alpha	41	17	0	TGTGCAGTTGATGGTGGTGCTACAAACAAGCTCATCTTT	CAVDGGATNKLIF	TRAV29/DV5		TRAJ32	TRA
1-PBS-alpha	42	17	0	TGTGCTACGGAATTTTCTGGTGGCTACAATAAGCTGATTTTT	CATEFSGGYNKLIF	TRAV17		TRAJ4	TRA
1-PBS-alpha	43	15	0	TGTGCAGAGAATAAAGATAATGCAGGCAACATGCTCACCTTT	CAENKDNAGNMLTF	TRAV13-2		TRAJ39	TRA
1-PBS-alpha	44	15	0	TGTGTGGTGAACGAGTGGGCAGGCTTTCAGAAACTTGTATTT	CVVNEWAGFQKLVF	TRAV12-1		TRAJ8	TRA
1-PBS-alpha	45	15	0	TGTGCAGGATCGGGTGGCAACAACCGTAAGCTGATTTGG	CAGSGGNNRKLIW	TRAV27		TRAJ38	TRA
1-PBS-alpha	46	14	0	TGTGCTGTCTCCACCGGTAACCAGTTCTATTTT	CAVSTGNQFYF	TRAV21		TRAJ49	TRA
1-PBS-alpha	47	14	0	TGTGCTGTGGCCGGAGTATTGGACAGCTGGGGGAAATTGCAGTTT	CAVAGVLDSWGKLQF	TRAV21		TRAJ24	TRA
1-PBS-alpha	48	13	0	TGCATCGTCAGACCCCTTTATAACCAGGGAGGAAAGCTTATCTTC	CIVRPLYNQGGKLIF	TRAV26-1		TRAJ23	TRA
1-PBS-alpha	49	13	0	TGTGCTGTGAGTGATGAAACCTCCTACGACAAGGTGATATTT	CAVSDETSYDKVIF	TRAV8-4		TRAJ50	TRA
1-PBS-alpha	50	12	0	TGTGCTCTGAGTGAAGGGGGAAGCCAAGGAAATCTCATCTTT	CALSEGGSQGNLIF	TRAV9-2		TRAJ42	TRA
1-PBS-alpha	51	12	0	TGTGCTCTGAGTGCCTTCACGGGAGGAGGAAACAAACTCACCTTT	CALSAFTGGGNKLTF	TRAV9-2		TRAJ10	TRA
1-PBS-alpha	52	12	0	TGTGCTGTCTCGCCACTCTATAACAATGACATGCGCTTT	CAVSPLYNNDMRF	TRAV21		TRAJ43	TRA
1-PBS-alpha	53	12	0	TGCATCCTGAAGTCTAACTCTGGGGCTGGGAGTTACCAACTCACTTTC	CILKSNSGAGSYQLTF	TRAV26-2		TRAJ28	TRA
1-PBS-alpha	54	11	0	TGTGCTGTCCATGGCTCTGGCAACACAGGCAAACTAATCTTT	CAVHGSGNTGKLIF	TRAV2		TRAJ37	TRA
1-PBS-alpha	55	11	0	TGTGCTTATAGGGCTAATACCGGCACTGCCAGTAAACTCACCTTT	CAYRANTGTASKLTF	TRAV38-2/DV8		TRAJ44	TRA
1-PBS-alpha	56	11	0	TGTGCTGTCCTCTCTTTTGGAAATGAGAAATTAACCTTT	CAVLSFGNEKLTF	TRAV21		TRAJ48	TRA
1-PBS-alpha	57	11	0	TGTGTGGTGAACTATAACTATGGTCAGAATTTTGTCTTT	CVVNYNYGQNFVF	TRAV12-1		TRAJ26	TRA
1-PBS-alpha	58	11	0	TGTGCTGTCCACAAAGACAGCTGGGGGAAATTGCAGTTT	CAVHKDSWGKLQF	TRAV20		TRAJ24	TRA
1-PBS-alpha	59	11	0	TGTGCAATGAGAGGGGGCGCTTATACTGGAGGCTTCAAAACTATCTTT	CAMRGGAYTGGFKTIF	TRAV14/DV4		TRAJ9	TRA
1-PBS-alpha	60	10	0	TGTGCAGCAAACATGAATTCAGGATACAGCACCCTCACCTTT	CAANMNSGYSTLTF	TRAV13-1		TRAJ11	TRA
1-PBS-alpha	61	10	0	TGTGGAGCAGACATGCAAGCTAACGACTACAAGCTCAGCTTT	CGADMQANDYKLSF	TRAV34		TRAJ20	TRA
1-PBS-alpha	62	10	0	TGTGCCGTGAACCGGGGGAGTGCTTCCAAGATAATCTTT	CAVNRGSASKIIF	TRAV12-2		TRAJ3	TRA
1-PBS-alpha	63	10	0	TGTGCTGTGCAGGCGGGATCAGGATACAGCACCCTCACCTTT	CAVQAGSGYSTLTF	TRAV20		TRAJ11	TRA
1-PBS-alpha	64	10	0	TGTGCAATGAGAGAGCTTTACAATAACAATGACATGCGCTTT	CAMRELYNNNDMRF	TRAV14/DV4		TRAJ43	TRA
1-PBS-alpha	65	10	0	TGTGCAGCGCGTTCTGGGGGTTACCAGAAAGTTACCTTT	CAARSGGYQKVTF	TRAV13-1		TRAJ13	TRA
1-PBS-alpha	66	9	0	TGTGCTACGGAGAGAGACTTTGGAAATGAGAAATTAACCTTT	CATERDFGNEKLTF	TRAV17		TRAJ48	TRA
1-PBS-alpha	67	9	0	TGTGCTGTGAGAAAAGACTACAAGCTCAGCTTT	CAVRKDYKLSF	TRAV1-2		TRAJ20	TRA
1-PBS-alpha	68	9	0	TGTGCTGTGGAGATGGATAGCAGCTATAAATTGATCTTC	CAVEMDSSYKLIF	TRAV21		TRAJ12	TRA
1-PBS-alpha	69	9	0	TGCATCCTGAGAGACGTTCACGGTGGTGCTACAAACAAGCTCATCTTT	CILRDVHGGATNKLIF	TRAV26-2		TRAJ32	TRA
1-PBS-alpha	70	9	0	TGTCACCCTGCATACTCTGGGGCTGGGAGTTACCAACTCACTTTC	CHPAYSGAGSYQLTF	TRAV27		TRAJ28	TRA
1-PBS-alpha	71	8	0	TGTGCAGCAAGCGTAAGCAACTATCAGTTAATCTGG	CAASVSNYQLIW	TRAV29/DV5		TRAJ33	TRA
1-PBS-alpha	72	8	0	TGTGTGGTGAGCCATTCTGGGGGTTACCAGAAAGTTACCTTT	CVVSHSGGYQKVTF	TRAV12-1		TRAJ13	TRA
1-PBS-alpha	73	8	0	TGTGCAGCAACCATGGAATATGGAAACAAGCTGGTCTTT	CAATMEYGNKLVF	TRAV23/DV6		TRAJ47	TRA
1-PBS-alpha	74	8	0	TGTGCTGTGATGGATAGCAGCTATAAATTGATCTTC	CAVMDSSYKLIF	TRAV1-2		TRAJ12	TRA
1-PBS-alpha	75	8	0	TGCATCGTCAGAGCAAACATCAATAACAATGACATGCGCTTT	CIVRANINNNDMRF	TRAV26-1		TRAJ43	TRA
1-PBS-alpha	76	7	0	TGTGCTTTCATGTTCGATACCGGCACTGCCAGTAAACTCACCTTT	CAFMFDTGTASKLTF	TRAV38-1		TRAJ44	TRA
1-PBS-alpha	77	7	0	TGTGCAGAATTCACGGGAGGAGGAAACAAACTCACCTTT	CAEFTGGGNKLTF	TRAV5		TRAJ10	TRA
1-PBS-alpha	78	7	0	TGTGCAGAGAAGGGAGACAGCTGGGGGAAATTGCAGTTT	CAEKGDSWGKLQF	TRAV13-2		TRAJ24	TRA
1-PBS-alpha	79	7	0	TGTGCAATGAGCGCGAATTCAGGATACAGCACCCTCACCTTT	CAMSANSGYSTLTF	TRAV12-3		TRAJ11	TRA
1-PBS-alpha	80	7	0	TGTGCCGTGAACGACAAGCTCATCTTT	CAVNDKLIF	TRAV12-2		TRAJ34	TRA
1-PBS-alpha	81	7	0	TGTGCAGCATCAGGAAACACACCTCTTGTCTTT	CAASGNTPLVF	TRAV13-1		TRAJ29	TRA
1-PBS-alpha	82	7	0	TGTGCCGCGATGAACACAGGCTTTCAGAAACTTGTATTT	CAAMNTGFQKLVF	TRAV12-2		TRAJ8	TRA
1-PBS-alpha	83	7	0	TGTGCTGTGAAAGGGTCTGGGGCTGGGAGTTACCAACTCACTTTC	CAVKGSGAGSYQLTF	TRAV21		TRAJ28	TRA
1-PBS-alpha	84	7	0	TGTGCCGTGAACACAGGAGGAGGTGCTGACGGACTCACCTTT	CAVNTGGGADGLTF	TRAV12-2		TRAJ45	TRA
1-PBS-alpha	85	6	0	TGTGTGGTGAGATTAAATACTGGAGGCTTCAAAACTATCTTT	CVVRLNTGGFKTIF	TRAV12-1		TRAJ9	TRA
1-PBS-alpha	86	6	0	TGTGCTCTGAGTCCGGCGGGATACAACTTCAACAAATTTTACTTT	CALSPAGYNFNKFYF	TRAV19		TRAJ21	TRA
1-PBS-alpha	87	6	0	TGTGCTTACGGGGGGAACAACAGACTCGCTTTT	CAYGGNNRLAF	TRAV12-2		TRAJ7	TRA
1-PBS-alpha	88	6	0	TGTGCAGCACCCGTCCGCCCTTCAGGAGGAGGTGCTGACGGACTCACCTTT	CAAPVRPSGGGADGLTF	TRAV13-1		TRAJ45	TRA
1-PBS-alpha	89	6	0	TGTGCTGTGAAGAAGGGCGGATCTGAAAAGCTGGTCTTT	CAVKKGGSEKLVF	TRAV21		TRAJ57	TRA
1-PBS-alpha	90	6	0	TGTGCAGCAAGCATAATCTTTGGAAATGAGAAATTAACCTTT	CAASIIFGNEKLTF	TRAV23/DV6		TRAJ48	TRA
1-PBS-alpha	91	6	0	TGTGCACCCGTAGGGGCATCTGAAAAGCTGGTCTTT	CAPVGASEKLVF	TRAV14/DV4		TRAJ57	TRA
1-PBS-alpha	92	6	0	TGTGCAGCAACTTACACAGGCTTTCAGAAACTTGTATTT	CAATYTGFQKLVF	TRAV13-1		TRAJ8	TRA
1-PBS-alpha	93	6	0	TGTGCTGGGCAGAATGCTGGTGGTACTAGCTATGGAAAGCTGACATTT	CAGQNAGGTSYGKLTF	TRAV35		TRAJ52	TRA
1-PBS-alpha	94	5	0	TGTGCAGCGGTAGCTATGGGTAGCAACTATCAGTTAATCTGG	CAAVAMGSNYQLIW	TRAV13-1		TRAJ33	TRA
1-PBS-alpha	95	5	0	TGTGCAGCAACAGAGTCTGGGGCTGGGAGTTACCAACTCACTTTC	CAATESGAGSYQLTF	TRAV29/DV5		TRAJ28	TRA
1-PBS-alpha	96	5	0	TGTGCTACGGACCCCCAAAGTGGAGGTAGCAACTATAAACTGACATTT	CATDPQSGGSNYKLTF	TRAV17		TRAJ53	TRA
1-PBS-alpha	97	5	0	TGTGCCCGAAATGGGAATTCTGGGGGTTACCAGAAAGTTACCTTT	CARNGNSGGYQKVTF	TRAV38-2/DV8		TRAJ13	TRA
1-PBS-alpha	98	5	0	TGTGCAATGAAGGGCAACTTTGGAAATGAGAAATTAACCTTT	CAMKGNFGNEKLTF	TRAV12-3		TRAJ48	TRA
1-PBS-alpha	99	5	0	TGCCTCGTGGGTGACTCGGGGGGAAATGAGAAATTAACCTTT	CLVGDSGGNEKLTF	TRAV4		TRAJ48	TRA
1-PBS-alpha	100	5	0	TGTGCAATGACCCCTAACGACTACAAGCTCAGCTTT	CAMTPNDYKLSF	TRAV12-3		TRAJ20	TRA
1-PBS-alpha	101	4	0	TGTGCAGCAAGCGGCGGGCCTGGTTCTGCAAGGCAACTGACCTTT	CAASGGPGSARQLTF	TRAV29/DV5		TRAJ22	TRA
1-PBS-alpha	102	4	0	TGTGCTATCCTAAACAGAGATGACAAGATCATCTTT	CAILNRDDKIIF	TRAV36/DV7		TRAJ30	TRA
1-PBS-alpha	103	4	0	TGTGCTGTGACAGATAGCAACTATCAGTTAATCTGG	CAVTDSNYQLIW	TRAV1-2		TRAJ33	TRA
1-PBS-alpha	104	4	0	TGTGCCGTGAATGTAGGAGGAGGAAGCTACATACCTACATTT	CAVNVGGGSYIPTF	TRAV8-1		TRAJ6	TRA
1-PBS-alpha	105	4	0	TGTGCAATGAGG	CAMR	TRAV12-3		TRAJ23	TRA
1-PBS-alpha	106	4	0	TGTGCAGCAAGCGACCCCGGTACTAGCTATGGAAAGCTGACATTT	CAASDPGTSYGKLTF	TRAV13-1		TRAJ52	TRA
1-PBS-alpha	107	4	0	TGTGTGGTGAGCGAAGGCTCTAGCAACACAGGCAAACTAATCTTT	CVVSEGSSNTGKLIF	TRAV10		TRAJ37	TRA
1-PBS-alpha	108	4	0	TGTGCTGTGGTATCCCAGATAGGCTTTGGGAATGTGCTGCATTGC	CAVVSQIGFGNVLHC	TRAV21		TRAJ35	TRA
1-PBS-alpha	109	4	0	TGTGCTACCTCGTCTGGGGGTTACCAGAAAGTTACCTTT	CATSSGGYQKVTF	TRAV20		TRAJ13	TRA
1-PBS-alpha	110	4	0	TGTGCAGTCCCCCCCACTGGAGGCTTCAAAACTATCTTT	CAVPPTGGFKTIF	TRAV13-1		TRAJ9	TRA
1-PBS-alpha	111	4	0	TGTGCTCTGAGTGCACGTTCTAACGACTACAAGCTCAGCTTT	CALSARSNDYKLSF	TRAV9-2		TRAJ20	TRA
1-PBS-alpha	112	4	0	TGTGCAGCAAGTAGGGGAAGCTACATACCTACATTT	CAASRGSYIPTF	TRAV13-1		TRAJ6	TRA
1-PBS-alpha	113	4	0	TGTGCCGTGATGGTCGGTGGCTACAATAAGCTGATTTTT	CAVMVGGYNKLIF	TRAV12-2		TRAJ4	TRA
1-PBS-alpha	114	4	0	TGTGCAGCAAGTTCGTACAGCACCCTCACCTTT	CAASSYSTLTF	TRAV13-1		TRAJ11	TRA
1-PBS-alpha	115	4	0	TGTGTGGTGGCACGGATGGGAGGAGGCTTCAAAACTATCTTT	CVVARMGGGFKTIF	TRAV12-1		TRAJ9	TRA
1-PBS-alpha	116	4	0	TGTGCTCTGAGCCCCCACGACGGCACTGCCAGTAAACTCACCTTT	CALSPHDGTASKLTF	TRAV19		TRAJ44	TRA
1-PBS-alpha	117	4	0	TGTGTGGTGAATAAGGGGGAATATGGAAACAAACTGGTCTTT	CVVNKGEYGNKLVF	TRAV12-1		TRAJ47	TRA
1-PBS-alpha	118	4	0	TGTGCTGTCAAGGCGAACACCGGTAACCAGTTCTATTTT	CAVKANTGNQFYF	TRAV41		TRAJ49	TRA
1-PBS-alpha	119	4	0	TGTGCTCTCCCATTTACCTCAGGAACCTACAAATACATCTTT	CALPFTSGTYKYIF	TRAV9-2		TRAJ40	TRA
1-PBS-alpha	120	4	0	TGTGCAATGAGCCACGACACGGGCAGGAGAGCACTTACTTTT	CAMSHDTGRRALTF	TRAV14/DV4		TRAJ5	TRA
1-PBS-alpha	121	3	0	TGTGCTGTCCGGAATAACAATGCCAGACTCATGTTT	CAVRNNNARLMF	TRAV20		TRAJ31	TRA
1-PBS-alpha	122	3	0	TGCCTCGTGGCCGCTGAAACTGGGGCAAACAACCTCTTCTTT	CLVAAETGANNLFF	TRAV4		TRAJ36	TRA
1-PBS-alpha	123	3	0	TGTGCAGCAAATTGGTCAGGAGGAGGTGCTGACGGACTCACCTTT	CAANWSGGGADGLTF	TRAV29/DV5		TRAJ45	TRA
1-PBS-alpha	124	3	0	TGTGCAGCAAGCTTAGATATATCTAACTTTGGAAATGAGAAATTAACCTTT	CAASLDISNFGNEKLTF	TRAV29/DV5		TRAJ48	TRA
1-PBS-alpha	125	3	0	TGTGCCGTGACTCAAGGGAATGCCAGACTCATGTTT	CAVTQGNARLMF	TRAV12-2		TRAJ31	TRA
1-PBS-alpha	126	3	0	TGTGCAGCCCCGCTTGGTGCTGACGGACTCACCTTT	CAAPLGADGLTF	TRAV13-1		TRAJ45	TRA
1-PBS-alpha	127	3	0	TGTGCTCTGAGTACCTCAGGAACCTACAAATACATCTTT	CALSTSGTYKYIF	TRAV9-2		TRAJ40	TRA
1-PBS-alpha	128	3	0	TGTGCAATGAGGGGACAGGGAGGAAAGCTTATCTTC	CAMRGQGGKLIF	TRAV12-3		TRAJ23	TRA
1-PBS-alpha	129	3	0	TGTGCTGTGACCGACTACAAGCTCAGCTTT	CAVTDYKLSF	TRAV21		TRAJ20	TRA
1-PBS-alpha	130	3	0	TGTGCTGTGGAGGATCAATCAGGAAACACACCTCTTGTCTTT	CAVEDQSGNTPLVF	TRAV2		TRAJ29	TRA
1-PBS-alpha	131	3	0	TGTGCAATGTGTTTTTCTGGTGGCTACAAGCTCAGCTTT	CAMCFSGGYKLSF	TRAV12-3		TRAJ20	TRA
1-PBS-alpha	132	3	0	TGTGCAACGACCCAGGGCGGATCTGAAAAGCTGGTCTTT	CATTQGGSEKLVF	TRAV13-1		TRAJ57	TRA
1-PBS-alpha	133	2	0	TGTGCTGTGGGGTACACGGGCAGGAGAGCACTTACTTTT	CAVGYTGRRALTF	TRAV20		TRAJ5	TRA
1-PBS-alpha	134	2	0	TGTGCTGGCCTCAATAGTGGAGGTAGCAACTATAAACTGACATTT	CAGLNSGGSNYKLTF	TRAV36/DV7		TRAJ53	TRA
1-PBS-alpha	135	2	0	TGTGCTCTAGAGAGGGGTTCTGCAAGGCAACTGACCTTT	CALERGSARQLTF	TRAV6		TRAJ22	TRA
1-PBS-alpha	136	2	0	TGTGCTGTCAGATCTTATTTGGTGATAGGAGGAGGTGCTGACGGACTCACCTTT	CAVRSYLVIGGGADGLTF	TRAV41		TRAJ45	TRA
1-PBS-alpha	137	2	0	TGTGCAATGAGACATGAAACTGGGGCAAACAACCTCTTCTTT	CAMRHETGANNLFF	TRAV14/DV4		TRAJ36	TRA
1-PBS-alpha	138	2	0	TGTGCAATGAAAAACCAGGGAGCCCAGAAGCTGGTATTT	CAMKNQGAQKLVF	TRAV12-3		TRAJ54	TRA
1-PBS-alpha	139	2	0	TGTGTGGTGAGAAACAAACTGGTCTTT	CVVRNKLVF	TRAV10		TRAJ47	TRA
1-PBS-alpha	140	2	0	TGTGCTCTTGGTCCTACTGGGGGTTACCAGAAAGTTACCTTT	CALGPTGGYQKVTF	TRAV38-2/DV8		TRAJ13	TRA
1-PBS-alpha	141	1	0	TGTGCTGCTCTTAACGACTACAAGCTCAGCTTT	CAALNDYKLSF	TRAV2		TRAJ20	TRA
1-PBS-alpha	142	1	0	TGTGCTGTGTTCCCGGAAACCTCCTACGACAAGGTGATATTT	CAVFPETSYDKVIF	TRAV21		TRAJ50	TRA
1-PBS-alpha	143	1	0	TGTGCTACGGACATGGATAGCAACTATCAGTTAATCTGG	CATDMDSNYQLIW	TRAV17		TRAJ33	TRA
1-PBS-alpha	144	1	0	TGCCTCGTGGGTGGGACACTCACGGGAGGAGGAAACAAACTCACCTTT	CLVGGTLTGGGNKLTF	TRAV4		TRAJ10	TRA
1-PBS-alpha	145	1	0	TGTGTGGTGAGCGACAGAAGCTCAACCCTGGGGAGGCTATACTTT	CVVSDRSSTLGRLYF	TRAV12-1		TRAJ18	TRA
1-PBS-alpha	146	1	0	TGTGTGGTGAACCGAGGATACAGCACCCTCACCTTT	CVVNRGYSTLTF	TRAV12-1		TRAJ11	TRA
1-PBS-alpha	147	1	0	TGTGTGGTGAGCGACAGAGGCTCAACCCTGGGGAGGCTTTACTTT	CVVSDRGSTLGRLYF	TRAV10		TRAJ18	TRA
1-PBS-alpha	148	1	0	TGTGCAGCACGTAGAGGATATAGCACCCTCACCTTT	CAARRGYSTLTF	TRAV13-1		TRAJ11	TRA
1-PBS-alpha	149	1	0	TGTGCTGTGGTTTCTGGTGGCTACAATAAGCTGATTTTT	CAVVSGGYNKLIF	TRAV8-3		TRAJ4	TRA
1-PBS-alpha	150	1	0	TGCATCGTCAGAGTCGGTACCGCTGCAGGCAACAAGCTAACTTTT	CIVRVGTAAGNKLTF	TRAV26-1		TRAJ17	TRA
1-PBS-alpha	151	1	0	TGTGCTGTGTGGGGCTTCAACAAATTCTACTTT	CAVWGFNKFYF	TRAV21		TRAJ21	TRA
1-PBS-alpha	152	1	0	TGTGCAGAGATCCGTGGTGGTACTAGCTATGGAAAGCTGACATTT	CAEIRGGTSYGKLTF	TRAV13-2		TRAJ52	TRA
1-PBS-alpha	153	1	0	TGTGCTTATAGGTACACCGGTAACCAGTTCTATTTT	CAYRYTGNQFYF	TRAV38-2/DV8		TRAJ49	TRA
1-PBS-alpha	154	1	0	TGTGTGGTGAAGGGACAGGGAGCCCAGAAGCTGGTATTT	CVVKGQGAQKLVF	TRAV12-1		TRAJ54	TRA
1-PBS-alpha	155	1	0	TGTGCTGGCCCTATCTTTATGGATAGCAACTATCAGTTAATCTGG	CAGPIFMDSNYQLIW	TRAV35		TRAJ33	TRA
1-PBS-alpha	156	1	0	TGCCTCGTGGGGCCAAATAATAATGCAGGCAACATGCTCACCTTT	CLVGPNNNAGNMLTF	TRAV4		TRAJ39	TRA
1-PBS-alpha	157	1	0	TGTGTGGTGAACAGGGGTCCGAAAAGCAGAGCTTCCAAGATAATCTTT	CVVNRGPKSRASKIIF	TRAV12-1		TRAJ3	TRA
1-PBS-alpha	158	1	0	TGTGCTCTGAGAGAAGGAGGAAGCTACATACCTACATTT	CALREGGSYIPTF	TRAV9-2		TRAJ6	TRA
1-PBS-alpha	159	1	0	TGTGTGGTGAAAAACCAGGGAGGAAAGCTTATCTTC	CVVKNQGGKLIF	TRAV12-1		TRAJ23	TRA
1-PBS-beta	1	44323	0.0839	TGTGCCAGCAGTGGATCGCCGGGACAGGGGGATACGCAGTATTTT	CASSGSPGQGDTQYF	TRBV25-1	TRBD1	TRBJ2-3	TRB
1-PBS-beta	2	44237	0.0837	TGTGCCAGCAGTTACCTACACGACTCTCCCGGGTACTTC	CASSYLHDSPGYF	TRBV28	TRBD1	TRBJ2-7	TRB
1-PBS-beta	3	36548	0.0692	TGCAGTGCTTCCCCTCTCCGAAGCACAGATACGCAGTATTTT	CSASPLRSTDTQYF	TRBV20-1	TRBD1	TRBJ2-3	TRB
1-PBS-beta	4	34099	0.0645	TGCGCCAGCAGCCAAACCCGGGACAGGGTATACACCGGGGAGCTGTTTTTT	CASSQTRDRVYTGELFF	TRBV4-3	TRBD1	TRBJ2-2	TRB
1-PBS-beta	5	32181	0.0609	TGTGCCAGCAGCCACGGGAGGAGGCTGGAGACCCAGTACTTC	CASSHGRRLETQYF	TRBV3-1	TRBD2	TRBJ2-5	TRB
1-PBS-beta	6	30406	0.0575	TGTGCCAGCAGTTTGAATGCAGGGCATCCACCCCTCCACTTT	CASSLNAGHPPLHF	TRBV12-3	TRBD1	TRBJ1-6	TRB
1-PBS-beta	7	29737	0.0563	TGTGCCAGCAGTCGGCAGTTGATGACTGAAGCTTTCTTT	CASSRQLMTEAFF	TRBV6-5		TRBJ1-1	TRB
1-PBS-beta	8	26556	0.0502	TGCAGTGCTCTGGACCCAAGGAGGAACACCGGGGAGCTGTTTTTT	CSALDPRRNTGELFF	TRBV20-1		TRBJ2-2	TRB
1-PBS-beta	9	24814	0.047	TGTGCCAGTAGGTTCGCCGGCACAGATACGCAGTATTTT	CASRFAGTDTQYF	TRBV28		TRBJ2-3	TRB
1-PBS-beta	10	24659	0.0467	TGTGCCAGCAGCCAAGATGGCACAGATACGCAGTATTTT	CASSQDGTDTQYF	TRBV7-6		TRBJ2-3	TRB
1-PBS-beta	11	23530	0.0445	TGTGCCAGCAGCGTAGAAGAGGGAGCCGAGCAGTACTTC	CASSVEEGAEQYF	TRBV9	TRBD2	TRBJ2-7	TRB
1-PBS-beta	12	22664	0.0429	TGTGCCAGCAGTCCCGGGACTAGCGGGAGGGCCTCGTACGAGCAGTACTTC	CASSPGTSGRASYEQYF	TRBV28	TRBD2	TRBJ2-7	TRB
1-PBS-beta	13	21601	0.0409	TGTGCCAGCAGCTTAGAGGAGGGGGTAGCGTCCTACAATGAGCAGTTCTTC	CASSLEEGVASYNEQFF	TRBV7-9	TRBD1	TRBJ2-1	TRB
1-PBS-beta	14	19369	0.0366	TGTGCCAGCAGTCCCGAGGGGGGAGGGCAAGAGACCCAGTACTTC	CASSPEGGGQETQYF	TRBV12-3	TRBD1	TRBJ2-5	TRB
1-PBS-beta	15	14484	0.0274	TGTGCCAGCAGTGAAACAGGCGAAAACAATGAGCAGTTCTTC	CASSETGENNEQFF	TRBV25-1	TRBD1	TRBJ2-1	TRB
1-PBS-beta	16	12912	0.0244	TGTGCCAGCAGCTTAGATCTTGTGGCCCAGTACTTC	CASSLDLVAQYF	TRBV7-2		TRBJ2-5	TRB
1-PBS-beta	17	11147	0.0211	TGTGCCAGCAGTGATGGCCTAAGGAACACCGGGGAGCTGTTTTTT	CASSDGLRNTGELFF	TRBV25-1	TRBD2	TRBJ2-2	TRB
1-PBS-beta	18	10242	0.0194	TGTGCCAGCAAGAACGCATGGGATCAGCCCCAGCATTTT	CASKNAWDQPQHF	TRBV27		TRBJ1-5	TRB
1-PBS-beta	19	9428	0.0178	TGTGCCAGCAGTGATTCTTCCGGGACTAGCGGGGGAGAGGCCCAGTACTTC	CASSDSSGTSGGEAQYF	TRBV25-1	TRBD2	TRBJ2-5	TRB
1-PBS-beta	20	9160	0.0173	TGTGCCAGCTCACCCTTGGTTCAAGAGACCCAGTACTTC	CASSPLVQETQYF	TRBV18		TRBJ2-5	TRB
1-PBS-beta	21	8787	0.0166	TGTGCCATCAGTGAGTCCGTAGTGACCTACGAGCAGTACTTC	CAISESVVTYEQYF	TRBV10-3		TRBJ2-7	TRB
1-PBS-beta	22	8632	0.0163	TGTGCCAGCAGTGAGCGAACAGGGGGGCTCGGCTATGGCTACACCTTC	CASSERTGGLGYGYTF	TRBV25-1	TRBD1	TRBJ1-2	TRB
1-PBS-beta	23	7051	0.0133	TGTGCCAGCAGGCAGTCCGGGACACCGGCCTACGAGCAGTACTTC	CASRQSGTPAYEQYF	TRBV5-6	TRBD1	TRBJ2-7	TRB
1-PBS-beta	24	6344	0.012	TGTGCCAGCAGCTTGTCCCCGGACTATGACATTCAGTACTTC	CASSLSPDYDIQYF	TRBV5-4	TRBD2	TRBJ2-4	TRB
1-PBS-beta	25	4775	0.009	TGTGCCAGCAGTGAAAGTTTCGGAACAGCCCAAGAGACCCAGTACTTC	CASSESFGTAQETQYF	TRBV25-1	TRBD1	TRBJ2-5	TRB
1-PBS-beta	26	4391	0.0083	TGTGCCAGCAGCCCACTGGGACAGGGAGGTGAGATTTCTGAAGCTTTCTTT	CASSPLGQGGEISEAFF	TRBV25-1	TRBD1	TRBJ1-1	TRB
1-PBS-beta	27	2070	0.0039	TGCGCCAGCAGCAAAGATCAGGGGCCAGATACGCAGTATTTT	CASSKDQGPDTQYF	TRBV4-3	TRBD1	TRBJ2-3	TRB
1-PBS-beta	28	1819	0.0034	TGTGCCAGCAGTTCTAGCGGGGTATTCACAGATACGCAGTATTTT	CASSSSGVFTDTQYF	TRBV28	TRBD2	TRBJ2-3	TRB
1-PBS-beta	29	410	0.0008	TGTGCCAGCAGCTTGATCGGGGGGCACCACAATGAGCAGTTCTTC	CASSLIGGHHNEQFF	TRBV5-4	TRBD2	TRBJ2-1	TRB
1-PBS-beta	30	146	0.0003	TGTGCCAGCAGCGTAGCGGAAGATACGCAGTATTTT	CASSVAEDTQYF	TRBV9		TRBJ2-3	TRB
1-PBS-beta	31	115	0.0002	TGTGCCAGTACGGGGGCTCCTAATCAGCCCCAGCATTTT	CASTGAPNQPQHF	TRBV19	TRBD1	TRBJ1-5	TRB
1-PBS-beta	32	61	0.0001	TGTGCCAGCAGCTTTGAGGGGGGGCCTGAGTTCTTC	CASSFEGGPEFF	TRBV7-2	TRBD2	TRBJ2-1	TRB
1-PBS-beta	33	59	0.0001	TGCGCCAGCAGCGATGGGACCTACACTGAAGCTTTCTTT	CASSDGTYTEAFF	TRBV5-1	TRBD1	TRBJ1-1	TRB
1-PBS-beta	34	55	0.0001	TGCAGCGTTGCGCATGGGTCCCTGAATGAGCAGTTCTTC	CSVAHGSLNEQFF	TRBV29-1	TRBD1	TRBJ2-1	TRB
1-PBS-beta	35	54	0.0001	TGCAGTGCTAGAGGTATAGGGCAAGAGCAGTACTTC	CSARGIGQEQYF	TRBV20-1		TRBJ2-7	TRB
1-PBS-beta	36	49	0.0001	TGCGCCAGCAGCCTTGGACAGGCCTACGAGCAGTACTTC	CASSLGQAYEQYF	TRBV4-3	TRBD1	TRBJ2-7	TRB
1-PBS-beta	37	47	0.0001	TGTGCCAGCAGCATCGGAGGGGGGACTAGGGCCAATGAGCAGTTCTTC	CASSIGGGTRANEQFF	TRBV7-9	TRBD2	TRBJ2-1	TRB
1-PBS-beta	38	41	0.0001	TGTGCCAGTAGAGCACAGGACCTTTACTATGGCTACACCTTC	CASRAQDLYYGYTF	TRBV19	TRBD1	TRBJ1-2	TRB
1-PBS-beta	39	39	0.0001	TGCGCCAGTTTACAGGCCTTGAACACTGAAGCTTTCTTT	CASLQALNTEAFF	TRBV10-2	TRBD2	TRBJ1-1	TRB
1-PBS-beta	40	39	0.0001	TGCAGCGTTGCGCCTAGCGGGAGTTCGTACAATGAGCAGTTCTTC	CSVAPSGSSYNEQFF	TRBV29-1	TRBD2	TRBJ2-1	TRB
1-PBS-beta	41	36	0.0001	TGTGCCAGCAGCTTAGCCGGAGCAGTTAACGAGCAGTACTTC	CASSLAGAVNEQYF	TRBV7-6		TRBJ2-7	TRB
1-PBS-beta	42	33	0.0001	TGTGCCAGCAGGCCGACAGGGCTGTACTATGGCTACACCTTC	CASRPTGLYYGYTF	TRBV27	TRBD1	TRBJ1-2	TRB
1-PBS-beta	43	33	0.0001	TGTGCCAGCAGTGAACCGGTGGCAGGGTCGGCCGGGGAGCTGTTTTTT	CASSEPVAGSAGELFF	TRBV25-1	TRBD1	TRBJ2-2	TRB
1-PBS-beta	44	30	0.0001	TGTGCCATCAGTCCGACAGGGGATACTGAAGCTTTCTTT	CAISPTGDTEAFF	TRBV10-3	TRBD1	TRBJ1-1	TRB
1-PBS-beta	45	29	0.0001	TGCGCCAGCGGAGACGGCGGGGAGACCCAGTACTTC	CASGDGGETQYF	TRBV10-1	TRBD2	TRBJ2-5	TRB
1-PBS-beta	46	28	0.0001	TGTGCCAGCAGTTACGGATCGGGGGGGCCTAACGGGGAGCTGTTTTTT	CASSYGSGGPNGELFF	TRBV6-5	TRBD2	TRBJ2-2	TRB
1-PBS-beta	47	28	0.0001	TGTGCCAGCAGCCAAGTGAGGGGGCCGGGGGGAAACACCATATATTTT	CASSQVRGPGGNTIYF	TRBV4-3	TRBD1	TRBJ1-3	TRB
1-PBS-beta	48	26	0	TGTGCCAGCAGTTCCTCCGACAGGGAAAGGTACAATGAGCAGTTCTTC	CASSSSDRERYNEQFF	TRBV25-1	TRBD1	TRBJ2-1	TRB
1-PBS-beta	49	26	0	TGCAGTGCTGAGGGATCTGGGGCCAACGTCCTGACTTTC	CSAEGSGANVLTF	TRBV20-1		TRBJ2-6	TRB
1-PBS-beta	50	26	0	TGTGCCAGCAGCCTCGACAGGGACAATGAGCAGTTCTTC	CASSLDRDNEQFF	TRBV7-8	TRBD1	TRBJ2-1	TRB
1-PBS-beta	51	23	0	TGTGCCAGCAGCTTAGTCCCTAACACTGAAGCTTTCTTT	CASSLVPNTEAFF	TRBV7-3	TRBD1	TRBJ1-1	TRB
1-PBS-beta	52	23	0	TGTGCCAGCAGCTTGGCCCAGTTCTCTGGAAACACCATATATTTT	CASSLAQFSGNTIYF	TRBV5-8		TRBJ1-3	TRB
1-PBS-beta	53	22	0	TGTGCCAGCAGTTTCACTAGCGCCGGGGAGCTGTTTTTT	CASSFTSAGELFF	TRBV27	TRBD2	TRBJ2-2	TRB
1-PBS-beta	54	22	0	TGTGCCAGCAGCTTAGATGGGGGAGCCAAAAACATTCAGTACTTC	CASSLDGGAKNIQYF	TRBV11-1	TRBD1	TRBJ2-4	TRB
1-PBS-beta	55	22	0	TGTGCCAGCAGTTTTAGTTACGAGCAGTACTTC	CASSFSYEQYF	TRBV12-3		TRBJ2-7	TRB
1-PBS-beta	56	21	0	TGTGCCAGTGGGGGAGACACCGGGGAGCTGTTTTTT	CASGGDTGELFF	TRBV6-6	TRBD1	TRBJ2-2	TRB
1-PBS-beta	57	20	0	TGCGCCAGCAGCCCGGGACAAGCCTACGAGCAGTACTTC	CASSPGQAYEQYF	TRBV4-3	TRBD1	TRBJ2-7	TRB
1-PBS-beta	58	20	0	TGTGCCAGCAGTTACCCACTCATTCGAGCGGGAGATCCAAGGATCGGGACAGATACGCAGTATTTT	CASSYPLIRAGDPRIGTDTQYF	TRBV6-2	TRBD2	TRBJ2-3	TRB
1-PBS-beta	59	20	0	TGCGCCAGCAGCCCCACAGGGAGTGGTGATCAGCCCCAGCATTTT	CASSPTGSGDQPQHF	TRBV5-1	TRBD1	TRBJ1-5	TRB
1-PBS-beta	60	19	0	TGTGCCAGCAGTTACCTCTATCCAGCGGAAACCTACGAGCAGTACTTC	CASSYLYPAETYEQYF	TRBV6-5	TRBD2	TRBJ2-7	TRB
1-PBS-beta	61	19	0	TGCAGTGCTAGAAAGCCCGGGTCGGGCGAGCAGTACTTC	CSARKPGSGEQYF	TRBV20-1	TRBD1	TRBJ2-7	TRB
1-PBS-beta	62	18	0	TGTGCCAGCGCCCCCCAGGTGGATGAGCAGTTCTTC	CASAPQVDEQFF	TRBV25-1	TRBD2	TRBJ2-1	TRB
1-PBS-beta	63	18	0	TGTGCCAGCAGTTTAGCAGTCCTCAAAAACATTCAGTACTTC	CASSLAVLKNIQYF	TRBV12-4	TRBD2	TRBJ2-4	TRB
1-PBS-beta	64	18	0	TGTGCCAGTAGACCGGGACCCAGAGGAGCTTTCTTT	CASRPGPRGAFF	TRBV19	TRBD1	TRBJ1-1	TRB
1-PBS-beta	65	18	0	TGCAGTGCTAGAGCTAGTCTGGGTTACGAGCAGTACTTC	CSARASLGYEQYF	TRBV20-1	TRBD2	TRBJ2-7	TRB
1-PBS-beta	66	18	0	TGTGCCAGCAGTCCCGGGACTAGCGGGGGAGAGGCCCAGTACTTC	CASSPGTSGGEAQYF	TRBV28	TRBD2	TRBJ2-5	TRB
1-PBS-beta	67	18	0	TGTGCCAGCAGTTTGGGCGGAGTCACTGAAGCTTTCTTT	CASSLGGVTEAFF	TRBV12-3		TRBJ1-1	TRB
1-PBS-beta	68	18	0	TGTGCCACCCAGTCCTCAGGGGGCGGGTATGGCTACACCTTC	CATQSSGGGYGYTF	TRBV12-4	TRBD1	TRBJ1-2	TRB
1-PBS-beta	69	17	0	TGTGCCAGCAGCTTAGGAAGCGGCGCAGGGGAGACCCAGTACTTC	CASSLGSGAGETQYF	TRBV7-9	TRBD1	TRBJ2-5	TRB
1-PBS-beta	70	17	0	TGCGCCAGCAGCCAACCATCAGGGCCAGCTTTCTTT	CASSQPSGPAFF	TRBV4-3	TRBD1	TRBJ1-1	TRB
1-PBS-beta	71	17	0	TGTGCCAGCAGCCAAGAACTCTCGAGCGCCGGGGAGCTGTTTTTT	CASSQELSSAGELFF	TRBV3-1		TRBJ2-2	TRB
1-PBS-beta	72	15	0	TGCGCCAGCAGCTTAACGGGGAGTGGCTACACCTTC	CASSLTGSGYTF	TRBV5-1	TRBD2	TRBJ1-2	TRB
1-PBS-beta	73	15	0	TGCGCCAGCAGTCCCGGGTCTAGCGGGAGGACAGATACGCAGTATTTT	CASSPGSSGRTDTQYF	TRBV5-1	TRBD2	TRBJ2-3	TRB
1-PBS-beta	74	15	0	TGCAGTGCCTCTATAGGTTTAATGAACACTGAAGCTTTCTTT	CSASIGLMNTEAFF	TRBV20-1		TRBJ1-1	TRB
1-PBS-beta	75	15	0	TGTGCCAGCAGTTTATTCGTGGGGGTGGGCAATCAGCCCCAGCATTTT	CASSLFVGVGNQPQHF	TRBV28	TRBD1	TRBJ1-5	TRB
1-PBS-beta	76	14	0	TGTGCCAGCAGTTACTTAAACAGCTACAATGAGCAGTTCTTC	CASSYLNSYNEQFF	TRBV6-2		TRBJ2-1	TRB
1-PBS-beta	77	14	0	TGCGCCAGCAGCCATTTTGACAGGTTCTACGAGCAGTACTTC	CASSHFDRFYEQYF	TRBV4-1	TRBD1	TRBJ2-7	TRB
1-PBS-beta	78	14	0	TGTGCCAGCAGTTTAAAAGACATAGTCTACGAGCAGTACTTC	CASSLKDIVYEQYF	TRBV12-3		TRBJ2-7	TRB
1-PBS-beta	79	14	0	TGCGCCAGCAGCTTGGCCGGGGTTCAAGAGACCCAGTACTTC	CASSLAGVQETQYF	TRBV5-1	TRBD1	TRBJ2-5	TRB
1-PBS-beta	80	14	0	TGTGCCAGCAGCTTAGACCCAGGGACTGGAAACACCATATATTTT	CASSLDPGTGNTIYF	TRBV7-9	TRBD1	TRBJ1-3	TRB
1-PBS-beta	81	14	0	TGTGCCAGCAGCTTAGACCGGGGCCACGAGCAGTACTTC	CASSLDRGHEQYF	TRBV7-8	TRBD1	TRBJ2-7	TRB
1-PBS-beta	82	14	0	TGCGCCAGCAGCCGGACAGGGATCACTGAAGCTTTCTTT	CASSRTGITEAFF	TRBV5-1	TRBD1	TRBJ1-1	TRB
1-PBS-beta	83	14	0	TGTGCCAGTAGTATATCGGGCGGGGTAGGGAATGAGCAGTTCTTC	CASSISGGVGNEQFF	TRBV19	TRBD2	TRBJ2-1	TRB
1-PBS-beta	84	14	0	TGTGCCAGCACCCTCGGGGGGGGGACTGAAGCTTTCTTT	CASTLGGGTEAFF	TRBV7-9	TRBD2	TRBJ1-1	TRB
1-PBS-beta	85	14	0	TGTGCCAGCAGTGGGACTAGCGGGAGGGTATCGAGAGATACGCAGTATTTT	CASSGTSGRVSRDTQYF	TRBV25-1	TRBD2	TRBJ2-3	TRB
1-PBS-beta	86	14	0	TGTGCCAGCAGCTTAGGGCCGGGACCAGGGTCCTACGAGCAGTACTTC	CASSLGPGPGSYEQYF	TRBV7-6	TRBD1	TRBJ2-7	TRB
1-PBS-beta	87	13	0	TGTGCCAGCAGTCTCTCGCTCCAGGGGACGAGGGAGACCCAGTACTTC	CASSLSLQGTRETQYF	TRBV25-1	TRBD1	TRBJ2-5	TRB
1-PBS-beta	88	13	0	TGCGCCAGCAGCCAAGATCTGGTACTAGCGGACTCCTACAATGAGCAGTTCTTC	CASSQDLVLADSYNEQFF	TRBV4-3	TRBD2	TRBJ2-1	TRB
1-PBS-beta	89	13	0	TGTGCCAGCAGTTCCGTAGACAGTCAAGAGACCCAGTACTTC	CASSSVDSQETQYF	TRBV12-4	TRBD1	TRBJ2-5	TRB
1-PBS-beta	90	13	0	TGTGCCAGCAGTGAACCGAGGGGGCCGAAGATGGAGACCCAGTACTTC	CASSEPRGPKMETQYF	TRBV25-1	TRBD1	TRBJ2-5	TRB
1-PBS-beta	91	13	0	TGTGCCAGCAGTGAACAAAATACGATAAACGAGAAACAGGGGGAAAAAGTTGAGCAGTTCTTC	CASSEQNTINEKQGEKVEQFF	TRBV25-1	TRBD1	TRBJ2-1	TRB
1-PBS-beta	92	13	0	TGTGCCAGCAGTTACCAGGTGGAGCCTCCCTATGGCTACACCTTC	CASSYQVEPPYGYTF	TRBV6-5	TRBD2	TRBJ1-2	TRB
1-PBS-beta	93	13	0	TGCGCCAGCAGCTTGGGGGCAGGACTTAACTATGGCTACACCTTC	CASSLGAGLNYGYTF	TRBV5-1	TRBD1	TRBJ1-2	TRB
1-PBS-beta	94	12	0	TGTGCCAGCAGCTTGGGGCGGTGGCCCCTCCACTTT	CASSLGRWPLHF	TRBV7-9	TRBD1	TRBJ1-6	TRB
1-PBS-beta	95	12	0	TGTGCCAGCAGTGAGGCCCGATTGGGGGCCAACGTCCTGACTTTC	CASSEARLGANVLTF	TRBV2	TRBD1	TRBJ2-6	TRB
1-PBS-beta	96	12	0	TGTGCCAGCAGTTTATCACCAGCCTCTTACAATGAGCAGTTCTTC	CASSLSPASYNEQFF	TRBV27		TRBJ2-1	TRB
1-PBS-beta	97	12	0	TGTGCCAGCAGTTCCCTCCTTAACGGGGCCTACGAGCAGTACTTC	CASSSLLNGAYEQYF	TRBV6-2	TRBD2	TRBJ2-7	TRB
1-PBS-beta	98	12	0	TGTGCCAGCAGCTTGGGGGGGGATATTAGGCAGCCCCAGCATTTT	CASSLGGDIRQPQHF	TRBV5-6	TRBD2	TRBJ1-5	TRB
1-PBS-beta	99	12	0	TGCGCCAGCAGCTACCCCACAGATACGCAGTATTTT	CASSYPTDTQYF	TRBV5-1		TRBJ2-3	TRB
1-PBS-beta	100	12	0	TGCGCCAGCAGCCATATAGCGGGGGGAACCTACGAGCAGTACTTC	CASSHIAGGTYEQYF	TRBV4-1	TRBD2	TRBJ2-7	TRB
1-PBS-beta	101	12	0	TGTGCCAGCAGCAGGCTTACAAGGGGCCAGGGCGAGCAGTACTTC	CASSRLTRGQGEQYF	TRBV12-3	TRBD1	TRBJ2-7	TRB
1-PBS-beta	102	11	0	TGTGCCAGCAGCTTGGACAGGGGGCTTCACACTGAAGCTTTCTTT	CASSLDRGLHTEAFF	TRBV7-6	TRBD1	TRBJ1-1	TRB
1-PBS-beta	103	11	0	TGTGCCAGCAGTGAATCGACAGGGCCCGGGGAGCTGTTTTTT	CASSESTGPGELFF	TRBV25-1	TRBD1	TRBJ2-2	TRB
1-PBS-beta	104	11	0	TGCGCCAGCAGCCTTGGGACTAGCGACTACAATGAGCAGTTCTTC	CASSLGTSDYNEQFF	TRBV4-3	TRBD2	TRBJ2-1	TRB
1-PBS-beta	105	11	0	TGTGCCAGCAGTTTCGGGGACAGGGGTATTTACGAGCAGTACTTC	CASSFGDRGIYEQYF	TRBV12-3	TRBD1	TRBJ2-7	TRB
1-PBS-beta	106	10	0	TGTGCCAGCAGCTTTGCCCTGGGACAGATGAACACTGAAGCTTTCTTT	CASSFALGQMNTEAFF	TRBV7-6	TRBD1	TRBJ1-1	TRB
1-PBS-beta	107	10	0	TGCGCCAGCAAAAGACAGGGTGACACCGGGGAGCTGTTTTTT	CASKRQGDTGELFF	TRBV5-1	TRBD1	TRBJ2-2	TRB
1-PBS-beta	108	9	0	TGTGCCAGCAGTGGATCGCCGGGACAGGGAGGTGAGATTTCTGAAGCTTTCTTT	CASSGSPGQGGEISEAFF	TRBV25-1	TRBD1	TRBJ1-1	TRB
1-PBS-beta	109	9	0	TGCAGTGCTAGAGTTCCTGAGGGATACGAGCAGTACTTC	CSARVPEGYEQYF	TRBV20-1		TRBJ2-7	TRB
1-PBS-beta	110	9	0	TGTGCCAGCAGTGAATGGGACGGGGTCAATGAGCAGTTCTTC	CASSEWDGVNEQFF	TRBV12-3	TRBD1	TRBJ2-1	TRB
1-PBS-beta	111	9	0	TGTGCCAGCAGCTCCATCCGGGGTAGCGGGGGGATGTATTCCTACGAGCAGTACTTC	CASSSIRGSGGMYSYEQYF	TRBV11-2	TRBD2	TRBJ2-7	TRB
1-PBS-beta	112	9	0	TGTGCCAGCAGCTGGGGGGACAGTCTAAATGAAAAACTGTTTTTT	CASSWGDSLNEKLFF	TRBV7-6	TRBD1	TRBJ1-4	TRB
1-PBS-beta	113	9	0	TGTGCCAGCAGCTCACCACTGACAGGGCTTAACTATGGCTACACCTTC	CASSSPLTGLNYGYTF	TRBV11-2	TRBD1	TRBJ1-2	TRB
1-PBS-beta	114	8	0	TGTGCCAGCAGCAGTACTTACGAGCAGTACTTC	CASSSTYEQYF	TRBV7-9		TRBJ2-7	TRB
1-PBS-beta	115	8	0	TGTGCCAGCAGCCCACTGGGACAGGGGGATACGCAGTATTTT	CASSPLGQGDTQYF	TRBV25-1	TRBD1	TRBJ2-3	TRB
1-PBS-beta	116	8	0	TGTGCCAGCAGCAAAGATCAGGGGCCAGATACGCAGTATTTT	CASSKDQGPDTQYF	TRBV7-9	TRBD1	TRBJ2-3	TRB
1-PBS-beta	117	8	0	TGTGCCAGCAGTTACCATGCAGGGGGCGAGGAGCAGTTCTTC	CASSYHAGGEEQFF	TRBV6-2	TRBD1	TRBJ2-1	TRB
1-PBS-beta	118	8	0	TGTGCCAGCAGCTCAGACAGGCGTCCCTACGAGCAGTACTTC	CASSSDRRPYEQYF	TRBV12-4	TRBD1	TRBJ2-7	TRB
1-PBS-beta	119	7	0	TGTGCCAGCAGTCGGGGGATCGTTGGTACTGAAAAACTGTTTTTT	CASSRGIVGTEKLFF	TRBV12-4	TRBD2	TRBJ1-4	TRB
1-PBS-beta	120	7	0	TGTGCCAGTTTGGCCTACCTCGTCGATGGCTACACCTTC	CASLAYLVDGYTF	TRBV6-2	TRBD2	TRBJ1-2	TRB
1-PBS-beta	121	7	0	TGTGCCAGCAGCCAAACCCGGGACAGGGTATACACCGGGGAGCTGTTTTTT	CASSQTRDRVYTGELFF	TRBV7-9	TRBD1	TRBJ2-2	TRB
1-PBS-beta	122	6	0	TGCGCCAGCAGTGAGGGGTTGCTCTACGAGCAGTACTTC	CASSEGLLYEQYF	TRBV28	TRBD1	TRBJ2-7	TRB
1-PBS-beta	123	6	0	TGTGCCAGCAGCCCCTATGGCCCCACTGAAGCTTTCTTT	CASSPYGPTEAFF	TRBV7-9	TRBD1	TRBJ1-1	TRB
1-PBS-beta	124	6	0	TGTGCCAGCAGCCAAGATTTCGACCGACGAGAGACCCAGTACTTC	CASSQDFDRRETQYF	TRBV7-9		TRBJ2-5	TRB
1-PBS-beta	125	5	0	TGTGCCACCAGTGACTCGGGACTGAGGGAGCAGTACTTC	CATSDSGLREQYF	TRBV25-1	TRBD2	TRBJ2-7	TRB
1-PBS-beta	126	5	0	TGTGCCAGCAGCCCCAATGTGGGCCTCAATGAGCAGTTCTTC	CASSPNVGLNEQFF	TRBV7-3		TRBJ2-1	TRB
1-PBS-beta	127	5	0	TGCGCCAGCAGCTTGGATCGGACAGGGGGAACCGGGGAGCTGTTTTTT	CASSLDRTGGTGELFF	TRBV5-1	TRBD1	TRBJ2-2	TRB
1-PBS-beta	128	5	0	TGTGCCAGCTCAACCGGGACAGGGGAAGTGCTTGGCTATGGCTACACCTTC	CASSTGTGEVLGYGYTF	TRBV18	TRBD1	TRBJ1-2	TRB
1-PBS-beta	129	5	0	TGTGCCAGCAGTCCCGGGACTAGCGGGGTATTCACAGATACGCAGTATTTT	CASSPGTSGVFTDTQYF	TRBV28	TRBD2	TRBJ2-3	TRB
1-PBS-beta	130	4	0	TGTGCCAGCAGTTTTGGGTTTGGCTACGAGCAGTACTTC	CASSFGFGYEQYF	TRBV12-3		TRBJ2-7	TRB
1-PBS-beta	131	4	0	TGTGCCAGCAGTGAACGGGACAGAGACTACGAGCAGTACTTC	CASSERDRDYEQYF	TRBV25-1	TRBD1	TRBJ2-7	TRB
1-PBS-beta	132	4	0	TGTGCCAGTAGTAGTCTAGCGGACAATGAGCAGTTCTTC	CASSSLADNEQFF	TRBV19	TRBD2	TRBJ2-1	TRB
1-PBS-beta	133	4	0	TGTGCCATCAGTCTGGCCACGGGGACTGAAGCTTTCTTT	CAISLATGTEAFF	TRBV28	TRBD2	TRBJ1-1	TRB
1-PBS-beta	134	3	0	TGCGCCAGCAGTGATGGCCTAAGGAACACCGGGGAGCTGTTTTTT	CASSDGLRNTGELFF	TRBV4-3	TRBD2	TRBJ2-2	TRB
1-PBS-beta	135	3	0	TGTGCCAGTAGTATTGCAGGGCGCGGCACTGAAGCTTTCTTT	CASSIAGRGTEAFF	TRBV19	TRBD1	TRBJ1-1	TRB
1-PBS-beta	136	3	0	TGTGCCAGCAGTTACGGTGGGGGCGGCGGGAGTGTAGTCGAGCAGTACTTC	CASSYGGGGGSVVEQYF	TRBV6-5	TRBD2	TRBJ2-7	TRB
1-PBS-beta	137	3	0	TGTGCCAGCAGTCACGACAGGGGGACAACTATCTATGGCTACACCTTC	CASSHDRGTTIYGYTF	TRBV2	TRBD1	TRBJ1-2	TRB
1-PBS-beta	138	3	0	TGTGCCAGCAGGCAGGGGCCGAACACCGGGGAGCTGTTTTTT	CASRQGPNTGELFF	TRBV3-1	TRBD1	TRBJ2-2	TRB
1-PBS-beta	139	2	0	TGTGCCAGCAGTTTGGCGGCCACCTACGAGCAGTACTTC	CASSLAATYEQYF	TRBV28		TRBJ2-7	TRB
1-PBS-beta	140	2	0	TGTGCCAGCAGTGAGTCCGTAGTGACCTACGAGCAGTACTTC	CASSESVVTYEQYF	TRBV6-5	TRBD2	TRBJ2-7	TRB
1-PBS-beta	141	2	0	TGTGCCAGCAGCTTAGAGGAGGGGGTAGCGTCCTACAATGAGCAGTATTTT	CASSLEEGVASYNEQYF	TRBV7-9	TRBD1	TRBJ2-3	TRB
1-PBS-beta	142	2	0	TGTGCCAGCAGTGAGGGGTTGCTCTACGAGCAGTACTTC	CASSEGLLYEQYF	TRBV7-9	TRBD1	TRBJ2-7	TRB
1-PBS-beta	143	2	0	TGCGCCAGCAGCTTGACAGACCACACTGAAGCTTTCTTT	CASSLTDHTEAFF	TRBV5-1		TRBJ1-1	TRB
1-PBS-beta	144	2	0	TGTGCCAGCAGTTCTAGCGGGAGGGCCTCGTACGAGCAGTACTTC	CASSSSGRASYEQYF	TRBV28	TRBD2	TRBJ2-7	TRB
1-PBS-beta	145	2	0	TGTGCCAGCAGTTTGAATGCAGGGCAAGAGACCCAGTACTTC	CASSLNAGQETQYF	TRBV12-3	TRBD1	TRBJ2-5	TRB
1-PBS-beta	146	2	0	TGTGCCAGCAGCTCAAGACAGGGGGTGAACACTGAAGCTTTCTTT	CASSSRQGVNTEAFF	TRBV25-1	TRBD1	TRBJ1-1	TRB
1-PBS-beta	147	2	0	TGTGCCAGCAGTTATGATCGGGAGGGCTACGAGCAGTACTTC	CASSYDREGYEQYF	TRBV6-5	TRBD2	TRBJ2-7	TRB
1-PBS-beta	148	1	0	TGTGCCAGCAGTCCCGAGGGGGGAGAGGCCCAGTACTTC	CASSPEGGEAQYF	TRBV12-3	TRBD1	TRBJ2-5	TRB
1-PBS-beta	149	1	0	TGCGCCAGCAGCAAAGATCAGGGACCAGATACGCAGTATTTT	CASSKDQGPDTQYF	TRBV7-9	TRBD1	TRBJ2-3	TRB
1-PBS-beta	150	1	0	TGTGCCAGCAGTTCCCTCCTTAACGGGGAGCTGTTTTTT	CASSSLLNGELFF	TRBV6-2	TRBD2	TRBJ2-2	TRB
1-PBS-beta	151	1	0	TGTGCCAGCAGTGGAACGCCGGGACAGGGGGATACGCAGTATTTT	CASSGTPGQGDTQYF	TRBV25-1	TRBD1	TRBJ2-3	TRB
1-PBS-beta	152	1	0	TGTGCCAGCAGTGATTCTTCCGGGACTAGCGGGAGGGCCTCGTACGAGCAGTACTTC	CASSDSSGTSGRASYEQYF	TRBV28	TRBD2	TRBJ2-7	TRB
1-PBS-beta	153	1	0	TGTGCCAGCAGCTTAGACAGATATGGCTACACCTTC	CASSLDRYGYTF	TRBV7-9		TRBJ1-2	TRB
1-PBS-beta	154	1	0	TGTGCCAGCAGTGATGGCCTAAGGAACACCGGGGGAGAGGCCCAGTACTTC	CASSDGLRNTGGEAQYF	TRBV27	TRBD2	TRBJ2-5	TRB
1-PBS-beta	155	1	0	TGTGCCAGCAGCTTAGAGGAGGGGTTGCTCTACGAGCAGTACTTC	CASSLEEGLLYEQYF	TRBV7-9	TRBD1	TRBJ2-7	TRB
1-PBS-beta	156	1	0	TGTGCCGGCAGCTTAGATCTTGTGGCCCAGTACTTC	CAGSLDLVAQYF	TRBV7-2		TRBJ2-5	TRB
1-PBS-beta	157	1	0	TGTGCCAGCAGCGTAGAAGAGGGAGCCGAGCAGTACTTCGGGCCGGGGGGAAACACCATATATTTT	CASSVEEGAEQYFGPGGNTIYF	TRBV9	TRBD1	TRBJ1-3	TRB
1-PBS-beta	158	1	0	TGTGACCGTGAGCCTGGTGCCCGGCCCGAAGTACTGCTCGTAGGCCGCTCCTACGAGCAGTACTTC	CDREPGARPEVLLVGRSYEQYF	TRBV5-6	TRBD1	TRBJ2-7	TRB
1-PBS-beta	159	1	0	TGCGCCAGCAGCCACGGGAGGAGGCTGGAGACCCAGTACTTC	CASSHGRRLETQYF	TRBV4-3	TRBD2	TRBJ2-5	TRB
1-PBS-beta	160	1	0	TGTGCCAGCAGCCAAGATGGCACAGATACGCAG	CASSQDGTDTQ	TRBV7-6		TRBJ2-3	TRB
1-PBS-beta	161	1	0	TGTGCCAGCAGCCACGGGAGGAGGCTGGAGACCCAGTATTTT	CASSHGRRLETQYF	TRBV28	TRBD2	TRBJ2-3	TRB
1-PBS-beta	162	1	0	TGCAGTGCTAGAATGGTGGTCTCCTACAATGAGCAGTTCTTC	CSARMVVSYNEQFF	TRBV20-1		TRBJ2-1	TRB
1-PBS-beta	163	1	0	TGTGCCAGCAATTTGAATGCAGGGCATCCACCCCTCCACTTT	CASNLNAGHPPLHF	TRBV5-6	TRBD1	TRBJ1-6	TRB
1-PBS-beta	164	1	0	TGCGCCAGCAGCGATGGGACACCGGCCTACGAGCAGTACTTC	CASSDGTPAYEQYF	TRBV5-1	TRBD1	TRBJ2-7	TRB
1-PBS-beta	165	1	0	TGTGCCAGCAGTGAAACAGGCGAAAACAATGAGCAGTATTTT	CASSETGENNEQYF	TRBV25-1	TRBD1	TRBJ2-3	TRB
1-PBS-beta	166	1	0	TGCGCCAGCAGCCAAACCCGGGACAGGGTATACACCATATATTTT	CASSQTRDRVYTIYF	TRBV4-3	TRBD1	TRBJ1-3	TRB
1-PBS-beta	167	1	0	TGTGCCAGCAGTGGTATCAACGCAGAGTACATG	CASSGINAEYM	TRBV25-1		TRBJ2-5	TRB
1-PBS-beta	168	1	0	TGTGCCAGCAGTTACTCTAGGGGCCGGGAAAAACTGTTTTTT	CASSYSRGREKLFF	TRBV6-6	TRBD1	TRBJ1-4	TRB
1-PBS-beta	169	1	0	TGCGCCAGCAGCTTGGAACTATCAGGGGCCTTGGAAAAACTGTTTTTT	CASSLELSGALEKLFF	TRBV5-1	TRBD1	TRBJ1-4	TRB
1-PBS-beta	170	1	0	TGTGCCAGCAGTGAAAGTTTCGGGACTAGCGGGGGAGAGGCCCAGTACTTC	CASSESFGTSGGEAQYF	TRBV25-1	TRBD2	TRBJ2-5	TRB
1-PBS-beta	171	1	0	TGTGCCAACAGTCCCGGGACTATCGGGAGGGCCTCGTACGAGCAGTACTTC	CANSPGTIGRASYEQYF	TRBV28	TRBD2	TRBJ2-7	TRB
1-PBS-beta	172	1	0	TGTGCAGCAAGCGCGTTGTCCGGGGAGCTGTTTTTT	CAASALSGELFF	TRBV4-3		TRBJ2-2	TRB
1-PBS-beta	173	1	0	TGCGCCAGCAGCAAAGGTCAGGGGCCAGATACGCAGTATTTT	CASSKGQGPDTQYF	TRBV7-9	TRBD1	TRBJ2-3	TRB
1-PBS-beta	174	1	0	TGCGCCAGCAGTGGATCGCCGGGACAGGGGGATACGCAGTATTTT	CASSGSPGQGDTQYF	TRBV4-3	TRBD1	TRBJ2-3	TRB
1-PBS-beta	175	1	0	TGTGCCAGTGGGGGAGACACCGGGGAGCAGTACTTC	CASGGDTGEQYF	TRBV6-6	TRBD1	TRBJ2-7	TRB
1-PBS-beta	176	1	0	TGTGCCAGCAGCATCGGAGGGGGGCTCGGCTATGGCTACACCTTC	CASSIGGGLGYGYTF	TRBV7-9	TRBD2	TRBJ1-2	TRB
1-PBS-beta	177	1	0	TGCGCCAGCTCCCCAGGGAGCGGGTACGAGCAGTACTTC	CASSPGSGYEQYF	TRBV4-3	TRBD2	TRBJ2-7	TRB
1-PBS-beta	178	1	0	TGTGCCAGCGGCTTGTCCCCGGACTATGACATTCAGTACTTC	CASGLSPDYDIQYF	TRBV5-6	TRBD2	TRBJ2-4	TRB
