# Supplementary material for: Identification of Potential Immunogenic Molecules During the Allogeneic Transplantation of Human Adipose-derived Mesenchymal Stem Cells
Source: Research Square preprint supplement (doi:10.21203/rs.3.rs-105760/v1), 2020-11-17
Supplement: Supplementary file 2 [file e0ba70bd0c1f6ff5daf27e70.xlsx]

## Sheet: Sheet1
SampleName	Clone_ID	Clone_Count	Clone_Fraction	N.Seq.CDR3	AA.Seq.CDR3	Best_V_Gene	Best_D_Gene	Best_J_Gene	Chain_Type
PBMC-Naive-alpha	1	22225	0.0607	TGCCTCGTGGGTAGAAACACCGGTAACCAGTTCTATTTT	CLVGRNTGNQFYF	TRAV4		TRAJ49	TRA
PBMC-Naive-alpha	2	17077	0.0466	TGCCTCGTGGATCGGAACACCGGTAACCAGTTCTATTTT	CLVDRNTGNQFYF	TRAV4		TRAJ49	TRA
PBMC-Naive-alpha	3	7208	0.0197	TGTGCTGGGCAGCCGATTCCTCCAAATTCCGGGTATGCACTCAACTTC	CAGQPIPPNSGYALNF	TRAV35		TRAJ41	TRA
PBMC-Naive-alpha	4	3103	0.0085	TGTGTGGTGAGCGACAGAGGCTCAACCCTGGGGAGGCTATACTTT	CVVSDRGSTLGRLYF	TRAV10		TRAJ18	TRA
PBMC-Naive-alpha	5	2040	0.0056	TGTGCTGTGAGAGATAGCAACTATCAGTTAATCTGG	CAVRDSNYQLIW	TRAV1-2		TRAJ33	TRA
PBMC-Naive-alpha	6	1964	0.0054	TGTGTGGCGGTTAACCAGGCAGGAACTGCTCTGATCTTT	CVAVNQAGTALIF	TRAV12-1		TRAJ15	TRA
PBMC-Naive-alpha	7	1781	0.0049	TGTGCAGGAGACAGAGATGACAAGATCATCTTT	CAGDRDDKIIF	TRAV27		TRAJ30	TRA
PBMC-Naive-alpha	8	1594	0.0044	TGTGCAATGAAAGGAGATTACGACTACAAGCTCAGCTTT	CAMKGDYDYKLSF	TRAV12-3		TRAJ20	TRA
PBMC-Naive-alpha	9	1589	0.0043	TGTGTGGTGGCACGGATGGGAGGAGGCTTCAAAACTATCTTT	CVVARMGGGFKTIF	TRAV12-1		TRAJ9	TRA
PBMC-Naive-alpha	10	1465	0.004	TGTGCTGTGAGAGATCGGGACTACAAGCTCAGCTTT	CAVRDRDYKLSF	TRAV1-2		TRAJ20	TRA
PBMC-Naive-alpha	11	1395	0.0038	TGTGCTGTGATGGATAGCAACTATCAGTTAATCTGG	CAVMDSNYQLIW	TRAV1-2		TRAJ33	TRA
PBMC-Naive-alpha	12	1191	0.0033	TGTGCTGTCATGGATAGCAACTATCAGTTAATCTGG	CAVMDSNYQLIW	TRAV1-2		TRAJ33	TRA
PBMC-Naive-alpha	13	1029	0.0028	TGTGCTCTAATGGCTGGAGCCAATAGTAAGCTGACATTT	CALMAGANSKLTF	TRAV16		TRAJ56	TRA
PBMC-Naive-alpha	14	997	0.0027	TGTGTGGTGAGAGACAGCTGGGGGAAATTGCAGTTT	CVVRDSWGKLQF	TRAV12-1		TRAJ24	TRA
PBMC-Naive-alpha	15	995	0.0027	TGTGCTGTGAGGAGCACCGGTAACCAGTTCTATTTT	CAVRSTGNQFYF	TRAV21		TRAJ49	TRA
PBMC-Naive-alpha	16	838	0.0023	TGTGCTGTGATGGATAGCAGCTATAAATTGATCTTC	CAVMDSSYKLIF	TRAV1-2		TRAJ12	TRA
PBMC-Naive-alpha	17	777	0.0021	TGTGCTCTGAGTGAGGCGAGGAATAACAATGCCAGACTCATGTTT	CALSEARNNNARLMF	TRAV19		TRAJ31	TRA
PBMC-Naive-alpha	18	728	0.002	TGTGCTGTGAGGGATAGCAACTATCAGTTAATCTGG	CAVRDSNYQLIW	TRAV1-2		TRAJ33	TRA
PBMC-Naive-alpha	19	712	0.0019	TGTGCTGTCCTAATGAACACAGGCTTTCAGAAACTTGTATTT	CAVLMNTGFQKLVF	TRAV22		TRAJ8	TRA
PBMC-Naive-alpha	20	704	0.0019	TGTGCTGTGCAGGCGCGTGACAAGATCATCTTT	CAVQARDKIIF	TRAV20		TRAJ30	TRA
PBMC-Naive-alpha	21	697	0.0019	TGTGCCGTGGACATAGTCGGTGCCAGACTCATGTTT	CAVDIVGARLMF	TRAV39		TRAJ31	TRA
PBMC-Naive-alpha	22	676	0.0018	TGTGCTGCCACGGGATACTCAGGAACCTACAAATACATCTTT	CAATGYSGTYKYIF	TRAV21		TRAJ40	TRA
PBMC-Naive-alpha	23	610	0.0017	TGTGCAGCAACCTCCTTAACTGACAGCTGGGGGAAATTGCAGTTT	CAATSLTDSWGKLQF	TRAV13-1		TRAJ24	TRA
PBMC-Naive-alpha	24	599	0.0016	TGTGCTGTGGCTTCATCAGGAGGAAGCTACATACCTACATTT	CAVASSGGSYIPTF	TRAV1-2		TRAJ6	TRA
PBMC-Naive-alpha	25	472	0.0013	TGTGCTGTGAGAGATGGCGACTACAAGCTCAGCTTT	CAVRDGDYKLSF	TRAV1-2		TRAJ20	TRA
PBMC-Naive-alpha	26	469	0.0013	TGTGCTGTGGAGGATCAATCAGGAAACACACCTCTTGTCTTT	CAVEDQSGNTPLVF	TRAV2		TRAJ29	TRA
PBMC-Naive-alpha	27	449	0.0012	TGCCTCGTGGGCCCCGACGGTATTAGCAACACAGGCAAACTAATCTTT	CLVGPDGISNTGKLIF	TRAV4		TRAJ37	TRA
PBMC-Naive-alpha	28	449	0.0012	TGTGCTGTTTCAGGATACAGCACCCTCACCTTT	CAVSGYSTLTF	TRAV2		TRAJ11	TRA
PBMC-Naive-alpha	29	446	0.0012	TGTGCTGTGAGAGATCTTGGCCAGGCAGGAACTGCTCTGATCTTT	CAVRDLGQAGTALIF	TRAV1-2		TRAJ15	TRA
PBMC-Naive-alpha	30	417	0.0011	TGTGCAGCAACGTATTCTGGTTCTGCAAGGCAACTGACCTTT	CAATYSGSARQLTF	TRAV29/DV5		TRAJ22	TRA
PBMC-Naive-alpha	31	403	0.0011	TGTGCTGTGAGAGATAGCAGCTATAAATTGATCTTC	CAVRDSSYKLIF	TRAV1-2		TRAJ12	TRA
PBMC-Naive-alpha	32	402	0.0011	TGTGTGGTGAACAGCCCCAATGGTCAGAATTTTGTCTTT	CVVNSPNGQNFVF	TRAV12-1		TRAJ26	TRA
PBMC-Naive-alpha	33	394	0.0011	TGTGCTGTGACGGATAGCAACTATCAGTTAATCTGG	CAVTDSNYQLIW	TRAV1-2		TRAJ33	TRA
PBMC-Naive-alpha	34	386	0.0011	TGTGCAGCAACCATTGGAGCCCAGAAGCTGGTATTT	CAATIGAQKLVF	TRAV13-1		TRAJ54	TRA
PBMC-Naive-alpha	35	382	0.001	TGTGCAGTTGGAACCTACAAATACATCTTT	CAVGTYKYIF	TRAV29/DV5		TRAJ40	TRA
PBMC-Naive-alpha	36	353	0.001	TGCCTCGTGGGTGACGACGGGACTGGAGGCTTCAAAACTATCTTT	CLVGDDGTGGFKTIF	TRAV4		TRAJ9	TRA
PBMC-Naive-alpha	37	336	0.0009	TGTGCCCCAGGGACTGCAGGCAACAAGCTAACTTTT	CAPGTAGNKLTF	TRAV12-2		TRAJ17	TRA
PBMC-Naive-alpha	38	333	0.0009	TGTGCTTATAGGAGCGGTTATGGCGGCACTGCCAGTAAACTCACCTTT	CAYRSGYGGTASKLTF	TRAV38-2/DV8		TRAJ44	TRA
PBMC-Naive-alpha	39	330	0.0009	TGTGCTGTCCTGGATAGCAACTATCAGTTAATCTGG	CAVLDSNYQLIW	TRAV1-2		TRAJ33	TRA
PBMC-Naive-alpha	40	314	0.0009	TGTGCTCTAGAATACGATGCTGGTGGTACTAGCTATGGAAAGCTGACATTT	CALEYDAGGTSYGKLTF	TRAV6		TRAJ52	TRA
PBMC-Naive-alpha	41	302	0.0008	TGTGCAGAGAGTACAGGCAAACTAATCTTT	CAESTGKLIF	TRAV5		TRAJ37	TRA
PBMC-Naive-alpha	42	293	0.0008	TGTGCAGCGGGGGGGCAGGGAGGAAAGCTTATCTTC	CAAGGQGGKLIF	TRAV13-1		TRAJ23	TRA
PBMC-Naive-alpha	43	288	0.0008	TGTGCAATGAGAGGGTATAACACCAATGCAGGCAAATCAACCTTT	CAMRGYNTNAGKSTF	TRAV14/DV4		TRAJ27	TRA
PBMC-Naive-alpha	44	285	0.0008	TGCCTCGTGGGTGACAGAGGGGACACGGGCAGGAGAGCACTTACTTTT	CLVGDRGDTGRRALTF	TRAV4		TRAJ5	TRA
PBMC-Naive-alpha	45	279	0.0008	TGTGCAGCAAGCGTCACCGGTAACCAGTTCTATTTT	CAASVTGNQFYF	TRAV29/DV5		TRAJ49	TRA
PBMC-Naive-alpha	46	257	0.0007	TGCATCGTCAAGGGGACCAGTGGCTCTAGGTTGACCTTT	CIVKGTSGSRLTF	TRAV26-1		TRAJ58	TRA
PBMC-Naive-alpha	47	252	0.0007	TGTGCTGTGCGCTTTGCATCAGGAGGAAGCTACATACCTACATTT	CAVRFASGGSYIPTF	TRAV20		TRAJ6	TRA
PBMC-Naive-alpha	48	250	0.0007	TGTGCTATCTACTACCCTTTCACGGGAGGAGGAAACAAACTCACCTTT	CAIYYPFTGGGNKLTF	TRAV38-2/DV8		TRAJ10	TRA
PBMC-Naive-alpha	49	248	0.0007	TGTGCTGCCATGGATAGCAACTATCAGTTAATCTGG	CAAMDSNYQLIW	TRAV1-2		TRAJ33	TRA
PBMC-Naive-alpha	50	247	0.0007	TGTGCTGTCTCATCAGGAGGAAGCTACATACCTACATTT	CAVSSGGSYIPTF	TRAV22		TRAJ6	TRA
PBMC-Naive-alpha	51	242	0.0007	TGTGCAGCAAGCGCGATGGATAGCAGCTATAAATTGATCTTC	CAASAMDSSYKLIF	TRAV29/DV5		TRAJ12	TRA
PBMC-Naive-alpha	52	235	0.0006	TGTGCTGCCCAGGATAGCAACTATCAGTTAATCTGG	CAAQDSNYQLIW	TRAV1-2		TRAJ33	TRA
PBMC-Naive-alpha	53	212	0.0006	TGCCTCGTGGATTCTGGTTCTGCAAGGCAACTGACCTTT	CLVDSGSARQLTF	TRAV4		TRAJ22	TRA
PBMC-Naive-alpha	54	212	0.0006	TGTGCCGTGGGGTGGAGGGATGGCCAGAAGCTGCTCTTT	CAVGWRDGQKLLF	TRAV12-2		TRAJ16	TRA
PBMC-Naive-alpha	55	209	0.0006	TGTGCTTATAGTTCAGGGGCTGGTGGTACTAGCTATGGAAAGCTGACATTT	CAYSSGAGGTSYGKLTF	TRAV38-2/DV8		TRAJ52	TRA
PBMC-Naive-alpha	56	202	0.0006	TGTGCTGTGTCTGGCACTGCCAGTAAACTCACCTTT	CAVSGTASKLTF	TRAV21		TRAJ44	TRA
PBMC-Naive-alpha	57	197	0.0005	TGTGCCCTGAATTCAGGATACAGCACCCTCACCTTT	CALNSGYSTLTF	TRAV24		TRAJ11	TRA
PBMC-Naive-alpha	58	192	0.0005	TGTGCGGGCGACAATGACATGCGCTTT	CAGDNDMRF	TRAV12-2		TRAJ43	TRA
PBMC-Naive-alpha	59	187	0.0005	TGTGCTGTTCTGGATAGCAACTATCAGTTAATCTGG	CAVLDSNYQLIW	TRAV1-2		TRAJ33	TRA
PBMC-Naive-alpha	60	186	0.0005	TGTGCTTATTATAACCAGGGAGGAAAGCTTATCTTC	CAYYNQGGKLIF	TRAV38-2/DV8		TRAJ23	TRA
PBMC-Naive-alpha	61	184	0.0005	TGTGCTGTGAGGCCTGGGTTTGCTTCCAAGATAATCTTT	CAVRPGFASKIIF	TRAV21		TRAJ3	TRA
PBMC-Naive-alpha	62	183	0.0005	TGTGCAGACCCGGGGGCAGGAACTGCTCTGATCTTT	CADPGAGTALIF	TRAV13-2		TRAJ15	TRA
PBMC-Naive-alpha	63	181	0.0005	TGTGCTGTGAACCAGGCAGGAACTGCTCTGATCTTT	CAVNQAGTALIF	TRAV1-2		TRAJ15	TRA
PBMC-Naive-alpha	64	178	0.0005	TGTGCTGTCTGGGATAGCAACTATCAGTTAATCTGG	CAVWDSNYQLIW	TRAV1-2		TRAJ33	TRA
PBMC-Naive-alpha	65	177	0.0005	TGTGCTGCCTCATCTTATAACACCGACAAGCTCATCTTT	CAASSYNTDKLIF	TRAV13-1		TRAJ34	TRA
PBMC-Naive-alpha	66	175	0.0005	TGTGCTTTCCGAGGCTCTGGGGCTGGGAGTTACCAACTCACTTTC	CAFRGSGAGSYQLTF	TRAV38-2/DV8		TRAJ28	TRA
PBMC-Naive-alpha	67	173	0.0005	TGTGCAGAGCAAAGCAACATGCTCACCTTT	CAEQSNMLTF	TRAV13-2		TRAJ39	TRA
PBMC-Naive-alpha	68	173	0.0005	TGTGCTACGTCTCCTGGGTTTTCAGATGGCCAGAAGCTGCTCTTT	CATSPGFSDGQKLLF	TRAV17		TRAJ16	TRA
PBMC-Naive-alpha	69	170	0.0005	TGTGCTGTGGAAAGACAGAAAGTTACCTTT	CAVERQKVTF	TRAV2		TRAJ13	TRA
PBMC-Naive-alpha	70	170	0.0005	TGTGCTGTGAAGGATAGCAACTATCAGTTAATCTGG	CAVKDSNYQLIW	TRAV1-2		TRAJ33	TRA
PBMC-Naive-alpha	71	169	0.0005	TGCGAGGACAGCAGTGCTTCCAAGATAATCTTT	CEDSSASKIIF	TRAV21		TRAJ3	TRA
PBMC-Naive-alpha	72	168	0.0005	TGTGCTGTGAGGATGGATAGCAGCTATAAATTGATCTTC	CAVRMDSSYKLIF	TRAV21		TRAJ12	TRA
PBMC-Naive-alpha	73	168	0.0005	TGTGCAGAGATGGGCTGGTACAGCAGTGCTTCCAAGATAATCTTT	CAEMGWYSSASKIIF	TRAV13-2		TRAJ3	TRA
PBMC-Naive-alpha	74	166	0.0005	TGCCTCGTGGCCCTTACAGGGACTGGAGGCTTCAAAACTATCTTT	CLVALTGTGGFKTIF	TRAV4		TRAJ9	TRA
PBMC-Naive-alpha	75	166	0.0005	TGTGCTGTGGTGGATAGCAGCTATAAATTGATCTTC	CAVVDSSYKLIF	TRAV1-2		TRAJ12	TRA
PBMC-Naive-alpha	76	164	0.0004	TGTGCTTCCATGGATAGCAACTATCAGTTAATCTGG	CASMDSNYQLIW	TRAV1-2		TRAJ33	TRA
PBMC-Naive-alpha	77	161	0.0004	TGTGCTGTGTTGGATAGCAACTATCAGTTAATCTGG	CAVLDSNYQLIW	TRAV1-2		TRAJ33	TRA
PBMC-Naive-alpha	78	158	0.0004	TGTGCTGTGAGACGTGGGGGTTACCAGAAAGTTACCTTT	CAVRRGGYQKVTF	TRAV21		TRAJ13	TRA
PBMC-Naive-alpha	79	157	0.0004	TGTGCTCTGAACTCCCGCACGGGCTTTCAGAAACTTGTATTT	CALNSRTGFQKLVF	TRAV9-2		TRAJ8	TRA
PBMC-Naive-alpha	80	156	0.0004	TGTGCCTCCCCAGGAGGAGGTGCTGACGGACTCACCTTT	CASPGGGADGLTF	TRAV24		TRAJ45	TRA
PBMC-Naive-alpha	81	152	0.0004	TGTGTGGTGAGCGCGGGTGCAGGCAACATGCTCACCTTT	CVVSAGAGNMLTF	TRAV10		TRAJ39	TRA
PBMC-Naive-alpha	82	152	0.0004	TGTGCTGTGATGGATAGCATCTATAAATTGATCTTC	CAVMDSIYKLIF	TRAV1-2		TRAJ12	TRA
PBMC-Naive-alpha	83	152	0.0004	TGCCTCGTGGGTGGGACACTCACGGGAGGAGGAAACAAACTCACCTTT	CLVGGTLTGGGNKLTF	TRAV4		TRAJ10	TRA
PBMC-Naive-alpha	84	149	0.0004	TGTGCTGTGCAGGATAGCAGCTATAAATTGATCTTC	CAVQDSSYKLIF	TRAV1-2		TRAJ12	TRA
PBMC-Naive-alpha	85	145	0.0004	TGTGCCGTGAACGTAGGAGGAAGCTACATACCTACATTT	CAVNVGGSYIPTF	TRAV12-2		TRAJ6	TRA
PBMC-Naive-alpha	86	140	0.0004	TGTGCTTGTGTGGGAACCTACAAATACATCTTT	CACVGTYKYIF	TRAV38-2/DV8		TRAJ40	TRA
PBMC-Naive-alpha	87	137	0.0004	TGTGCTCTGACCTTCTATAACACCGACAAGCTCATCTTT	CALTFYNTDKLIF	TRAV9-2		TRAJ34	TRA
PBMC-Naive-alpha	88	136	0.0004	TGTGCTCCCATGGATAGCAACTATCAGTTAATCTGG	CAPMDSNYQLIW	TRAV1-2		TRAJ33	TRA
PBMC-Naive-alpha	89	135	0.0004	TGTGCTTCAGGAGGTAACCAGTTCTATTTT	CASGGNQFYF	TRAV21		TRAJ49	TRA
PBMC-Naive-alpha	90	134	0.0004	TGTGCAGAGTTTTCTGGTGGCTACAATAAGCTGATTTTT	CAEFSGGYNKLIF	TRAV5		TRAJ4	TRA
PBMC-Naive-alpha	91	133	0.0004	TGTGCTCATAGGATGACTCAGGGCGGATCTGAAAAGCTGGTCTTT	CAHRMTQGGSEKLVF	TRAV9-2		TRAJ57	TRA
PBMC-Naive-alpha	92	128	0.0003	TGTGCTGGGCAGAATGCTGGTGGTACTAGCTATGGAAAGCTGACATTT	CAGQNAGGTSYGKLTF	TRAV35		TRAJ52	TRA
PBMC-Naive-alpha	93	127	0.0003	TGTGCAGCCGTCCCCTTTGACAGCTGGGGGAAATTGCAGTTT	CAAVPFDSWGKLQF	TRAV13-1		TRAJ24	TRA
PBMC-Naive-alpha	94	127	0.0003	TGTGCTGTTCCCCCAACCTCAGGAACCTACAAATACATCTTT	CAVPPTSGTYKYIF	TRAV21		TRAJ40	TRA
PBMC-Naive-alpha	95	125	0.0003	TGTGCATCGGAGGACACAGGCTTTCAGAAACTTGTATTT	CASEDTGFQKLVF	TRAV13-1		TRAJ8	TRA
PBMC-Naive-alpha	96	124	0.0003	TGTGCTCTTGGGGAATTCAGCAGTGCTTCCAAGATAATCTTT	CALGEFSSASKIIF	TRAV38-2/DV8		TRAJ3	TRA
PBMC-Naive-alpha	97	123	0.0003	TGTGCTCTAAGGAATGCCAGACTCATGTTT	CALRNARLMF	TRAV5		TRAJ31	TRA
PBMC-Naive-alpha	98	123	0.0003	TGGTCAGGAACTGCTCTGATCTTT	WSGTALIF	TRAV38-2/DV8		TRAJ15	TRA
PBMC-Naive-alpha	99	119	0.0003	TGTGCTGTGAGGCTAATCGATGGCCAGAAGCTGCTCTTT	CAVRLIDGQKLLF	TRAV21		TRAJ16	TRA
PBMC-Naive-alpha	100	118	0.0003	TGTGCTGTCAGCACGGGAGGAGGAAACAAACTCACCTTT	CAVSTGGGNKLTF	TRAV21		TRAJ10	TRA
PBMC-Naive-alpha	101	117	0.0003	TGTGCTGCACCTTACAGTGGCTCTAGGTTGACCTTT	CAAPYSGSRLTF	TRAV35		TRAJ58	TRA
PBMC-Naive-alpha	102	117	0.0003	TGTGCTGTGAAGACCAATGCAGGCAAATCAACCTTT	CAVKTNAGKSTF	TRAV2		TRAJ27	TRA
PBMC-Naive-alpha	103	116	0.0003	TGTGCAGCAAACACCGGTAACCAGTTCTATTTT	CAANTGNQFYF	TRAV29/DV5		TRAJ49	TRA
PBMC-Naive-alpha	104	115	0.0003	TGTGCTACGTATCGGGAATATGGAAACAAGCTGGTCTTT	CATYREYGNKLVF	TRAV17		TRAJ47	TRA
PBMC-Naive-alpha	105	114	0.0003	TGTGCTTTCCGGAGACTGCCCGGTAACCAGTTCTATTTT	CAFRRLPGNQFYF	TRAV38-1		TRAJ49	TRA
PBMC-Naive-alpha	106	111	0.0003	TGTGCTCCGAAGGGCAACTTCAACAAATTTTACTTT	CAPKGNFNKFYF	TRAV21		TRAJ21	TRA
PBMC-Naive-alpha	107	111	0.0003	TGTGCTGTCCTAGATAGCAACTATCAGTTAATCTGG	CAVLDSNYQLIW	TRAV1-2		TRAJ33	TRA
PBMC-Naive-alpha	108	111	0.0003	TGTGCAGCAAGCCTCCTCGCGGGGAGTTACCAACTCACTTTC	CAASLLAGSYQLTF	TRAV29/DV5		TRAJ28	TRA
PBMC-Naive-alpha	109	110	0.0003	TGTGCAGCGCGCCCCCATGGCTCTAGCAACACAGGCAAACTAATCTTT	CAARPHGSSNTGKLIF	TRAV13-1		TRAJ37	TRA
PBMC-Naive-alpha	110	110	0.0003	TGTGCTTATCTCTTCGATGCCAGACTCATGTTT	CAYLFDARLMF	TRAV38-2/DV8		TRAJ31	TRA
PBMC-Naive-alpha	111	109	0.0003	TGTGCTGGGCAGTCAAAGGGAGCCCAGAAGCTGGTATTT	CAGQSKGAQKLVF	TRAV35		TRAJ54	TRA
PBMC-Naive-alpha	112	108	0.0003	TGTGCAGCAAGCGTTACAGGAACTGCTCTGATCTTT	CAASVTGTALIF	TRAV29/DV5		TRAJ15	TRA
PBMC-Naive-alpha	113	108	0.0003	TGTGCCGTGGACCTCAATTCAGGAAACACACCTCTTGTCTTT	CAVDLNSGNTPLVF	TRAV39		TRAJ29	TRA
PBMC-Naive-alpha	114	107	0.0003	TGTGCTGGATACGTCGACTACAAGCTCAGCTTT	CAGYVDYKLSF	TRAV21		TRAJ20	TRA
PBMC-Naive-alpha	115	107	0.0003	TGTGCTGCAACTAATGCTGGTGGTACTAGCTATGGAAAGCTGACATTT	CAATNAGGTSYGKLTF	TRAV20		TRAJ52	TRA
PBMC-Naive-alpha	116	106	0.0003	TGTGCTGTGAAAGAGAGCAACTATCAGTTAATCTGG	CAVKESNYQLIW	TRAV1-2		TRAJ33	TRA
PBMC-Naive-alpha	117	106	0.0003	TGTGTGGTGAGTCGGGCAGGAGGAAGCTACATACCTACATTT	CVVSRAGGSYIPTF	TRAV10		TRAJ6	TRA
PBMC-Naive-alpha	118	105	0.0003	TGTGCTTATTTCTTTAATGCCAGACTCATGTTT	CAYFFNARLMF	TRAV38-2/DV8		TRAJ31	TRA
PBMC-Naive-alpha	119	104	0.0003	TGTGCTGTGCAGCCCTCTGGGGGTTACCAGAAAGTTACCTTT	CAVQPSGGYQKVTF	TRAV20		TRAJ13	TRA
PBMC-Naive-alpha	120	104	0.0003	TGTGCTGTGAGGGATAACACCAATGCAGGCAAATCAACCTTT	CAVRDNTNAGKSTF	TRAV21		TRAJ27	TRA
PBMC-Naive-alpha	121	103	0.0003	TGCGCTGTGAGATACAGCACCCTCACCTTT	CAVRYSTLTF	TRAV1-1		TRAJ11	TRA
PBMC-Naive-alpha	122	102	0.0003	TGTGCAGCAAGCGCGCGGAACAATGCCAGACTCATGTTT	CAASARNNARLMF	TRAV29/DV5		TRAJ31	TRA
PBMC-Naive-alpha	123	102	0.0003	TGTGCTGTGAGGGAGAGTGGAGGTAGCAACTATAAACTGACATTT	CAVRESGGSNYKLTF	TRAV21		TRAJ53	TRA
PBMC-Naive-alpha	124	101	0.0003	TGTGCCGTGAGGGGGGTCACCAATGCAGGCAAATCAACCTTT	CAVRGVTNAGKSTF	TRAV12-2		TRAJ27	TRA
PBMC-Naive-alpha	125	100	0.0003	TGTGCTCTGAGTGAGAACAATGACATGCGCTTT	CALSENNDMRF	TRAV9-2		TRAJ43	TRA
PBMC-Naive-alpha	126	100	0.0003	TGTGCTGTTGATGGCTCTAGCAACACAGGCAAACTAATCTTT	CAVDGSSNTGKLIF	TRAV21		TRAJ37	TRA
PBMC-Naive-alpha	127	100	0.0003	TGTGCAACGGGCTCTAGCAACACAGGCAAACTAATCTTT	CATGSSNTGKLIF	TRAV12-3		TRAJ37	TRA
PBMC-Naive-alpha	128	100	0.0003	TGTGCTGTGAGAATAGACAGAGATGACAAGATCATCTTT	CAVRIDRDDKIIF	TRAV3		TRAJ30	TRA
PBMC-Naive-alpha	129	99	0.0003	TGTGTGGTGAGCGCGTCGAACTCAAATTCCGGGTATGCACTCAACTTC	CVVSASNSNSGYALNF	TRAV10		TRAJ41	TRA
PBMC-Naive-alpha	130	99	0.0003	TGTGCTGTCACCTCTGGGGGTTACCAGAAAGTTACCTTT	CAVTSGGYQKVTF	TRAV2		TRAJ13	TRA
PBMC-Naive-alpha	131	99	0.0003	TGTGCAGCCCAAGGTACTAGCTATGGAAAGCTGACATTT	CAAQGTSYGKLTF	TRAV13-1		TRAJ52	TRA
PBMC-Naive-alpha	132	98	0.0003	TGTGCTTATAGGAGACCGATACCTAACAATGACATGCGCTTT	CAYRRPIPNNDMRF	TRAV38-2/DV8		TRAJ43	TRA
PBMC-Naive-alpha	133	98	0.0003	TGTGTGGCGTCCGACAGAGGCTCAACCCTGGGGAGGCTATACTTT	CVASDRGSTLGRLYF	TRAV10		TRAJ18	TRA
PBMC-Naive-alpha	134	98	0.0003	TGTGTGGTGAGCGGAGGTCCTGCAGGCAACATGCTCACCTTT	CVVSGGPAGNMLTF	TRAV10		TRAJ39	TRA
PBMC-Naive-alpha	135	98	0.0003	TGTGCTGTGGTAAGACGCGCAGGCAAATCAACCTTT	CAVVRRAGKSTF	TRAV21		TRAJ27	TRA
PBMC-Naive-alpha	136	98	0.0003	TGTGCAGCCCCCTATTATTATGGAGGAAGCCAAGGAAATCTCATCTTT	CAAPYYYGGSQGNLIF	TRAV29/DV5		TRAJ42	TRA
PBMC-Naive-alpha	137	97	0.0003	TGTGCTTATAGGACCTTCTACAATAACAATGACATGCGCTTT	CAYRTFYNNNDMRF	TRAV38-2/DV8		TRAJ43	TRA
PBMC-Naive-alpha	138	97	0.0003	TGTGCTGTGAGGCGGCCACAGAAAACCTCCTACGACAAGGTGATATTT	CAVRRPQKTSYDKVIF	TRAV21		TRAJ50	TRA
PBMC-Naive-alpha	139	96	0.0003	TGTGCAATGACCCTATCAGGAGGAAGCTACATACCTACATTT	CAMTLSGGSYIPTF	TRAV12-3		TRAJ6	TRA
PBMC-Naive-alpha	140	96	0.0003	TGCCTCGCGTCAGGAAACACACCTCTTGTCTTT	CLASGNTPLVF	TRAV4		TRAJ29	TRA
PBMC-Naive-alpha	141	95	0.0003	TGTGCTGTGCACACTTATTCTAACGACTACAAGCTCAGCTTT	CAVHTYSNDYKLSF	TRAV20		TRAJ20	TRA
PBMC-Naive-alpha	142	95	0.0003	TGCCTCGTGGGTGACCGGAACAATGCCAGACTCATGTTT	CLVGDRNNARLMF	TRAV4		TRAJ31	TRA
PBMC-Naive-alpha	143	94	0.0003	TGTGCTTATAGGATTCTCGATACCGGCACTGCCAGTAAACTCACCTTT	CAYRILDTGTASKLTF	TRAV38-2/DV8		TRAJ44	TRA
PBMC-Naive-alpha	144	94	0.0003	TGCCTCGTGGGTGGGGTCACGGGAGGAGGAAACAAACTCACCTTT	CLVGGVTGGGNKLTF	TRAV4		TRAJ10	TRA
PBMC-Naive-alpha	145	94	0.0003	TGTGCTGCCGAGGATAGCAACTATCAGTTAATCTGG	CAAEDSNYQLIW	TRAV1-2		TRAJ33	TRA
PBMC-Naive-alpha	146	94	0.0003	TGTGCAGCCCCAAGTGGTGCTGACGGACTCACCTTT	CAAPSGADGLTF	TRAV13-1		TRAJ45	TRA
PBMC-Naive-alpha	147	93	0.0003	TGTGCTGTGAGTCTCAACAAATTTTACTTT	CAVSLNKFYF	TRAV21		TRAJ21	TRA
PBMC-Naive-alpha	148	93	0.0003	TGTGCTTATAGAGGAGGAGGTGCTGACGGACTCACCTTT	CAYRGGGADGLTF	TRAV38-2/DV8		TRAJ45	TRA
PBMC-Naive-alpha	149	93	0.0003	TGTCGGCCGAATGGGGCTGGGAGTTACCAACTCACTTTC	CRPNGAGSYQLTF	TRAV30		TRAJ28	TRA
PBMC-Naive-alpha	150	93	0.0003	TGTGCTCTGAGTCCCACCGGTAACCAGTTCTATTTT	CALSPTGNQFYF	TRAV9-2		TRAJ49	TRA
PBMC-Naive-alpha	151	92	0.0003	TGTGCAGGGCCTGGTGCTGGTGGTACTAGCTATGGAAAGCTGACATTT	CAGPGAGGTSYGKLTF	TRAV25		TRAJ52	TRA
PBMC-Naive-alpha	152	92	0.0003	TGTGCTGTGCCTTATTCAGATGGCCAGAAGCTGCTCTTT	CAVPYSDGQKLLF	TRAV21		TRAJ16	TRA
PBMC-Naive-alpha	153	92	0.0003	TGTGCACCGAAAGGGGATAGCAGCTATAAATTGATCTTC	CAPKGDSSYKLIF	TRAV6		TRAJ12	TRA
PBMC-Naive-alpha	154	91	0.0002	TGTGCTGTCCGGATGGATAGCAGCTATAAATTGATCTTC	CAVRMDSSYKLIF	TRAV21		TRAJ12	TRA
PBMC-Naive-alpha	155	91	0.0002	TGTGCTTATAGGAGCGCCCTTTATGGTGGTGCTACAAACAAGCTCATCTTT	CAYRSALYGGATNKLIF	TRAV38-2/DV8		TRAJ32	TRA
PBMC-Naive-alpha	156	91	0.0002	TGTGCTGTGGTAGATAGCAACTATCAGTTAATCTGG	CAVVDSNYQLIW	TRAV1-2		TRAJ33	TRA
PBMC-Naive-alpha	157	90	0.0002	TGCCTCGTGGGTGATCCTTACTCTGGGGCTGGGAGTTACCAACTCACTTTC	CLVGDPYSGAGSYQLTF	TRAV4		TRAJ28	TRA
PBMC-Naive-alpha	158	89	0.0002	TGTGCTGTTTTGATGAACACAGGCTTTCAGAAACTTGTATTT	CAVLMNTGFQKLVF	TRAV22		TRAJ8	TRA
PBMC-Naive-alpha	159	89	0.0002	TGTGCTGCTTCCACAGGCAACATGCTCACCTTT	CAASTGNMLTF	TRAV21		TRAJ39	TRA
PBMC-Naive-alpha	160	89	0.0002	TGTGCAGCAAGCGCGTCCAATGACATGCGCTTT	CAASASNDMRF	TRAV29/DV5		TRAJ43	TRA
PBMC-Naive-alpha	161	89	0.0002	TGCCTCGTGGGTTCCTCCATGGACACGGGCAGGAGAGCACTTACTTTT	CLVGSSMDTGRRALTF	TRAV4		TRAJ5	TRA
PBMC-Naive-alpha	162	89	0.0002	TGTGCTGTGGAGCGGACGGACACGGGCAGGAGAGCACTTACTTTT	CAVERTDTGRRALTF	TRAV22		TRAJ5	TRA
PBMC-Naive-alpha	163	88	0.0002	TGTGCTTATAGGAGCGTAGACACCGACAAGCTCATCTTT	CAYRSVDTDKLIF	TRAV38-2/DV8		TRAJ34	TRA
PBMC-Naive-alpha	164	88	0.0002	TGTGCAGCAAGCGTGACCGGTAACCAGTTCTATTTT	CAASVTGNQFYF	TRAV29/DV5		TRAJ49	TRA
PBMC-Naive-alpha	165	88	0.0002	TGTGCTCTGACGCAAGAGCTTATCTTC	CALTQELIF	TRAV19		TRAJ23	TRA
PBMC-Naive-alpha	166	87	0.0002	CGTGATTCTGGTTCTGCAAGGCAACTGACCTTT	RDSGSARQLTF	TRAV27		TRAJ22	TRA
PBMC-Naive-alpha	167	87	0.0002	TGTGCAGCAAGGCCACATACTGGAGGCTTCAAAACTATCTTT	CAARPHTGGFKTIF	TRAV29/DV5		TRAJ9	TRA
PBMC-Naive-alpha	168	87	0.0002	TGTGCTGTCCATTCAGGAGGAGGTGCTGACGGACTCACCTTT	CAVHSGGGADGLTF	TRAV21		TRAJ45	TRA
PBMC-Naive-alpha	169	86	0.0002	TGTGCTGTGAGGCCATTTAATGCTGGTGGTACTAGCTATGGAAAGCTGACATTT	CAVRPFNAGGTSYGKLTF	TRAV21		TRAJ52	TRA
PBMC-Naive-alpha	170	85	0.0002	TGTGCAGCAAGCGCGTATAATAATGCAGGCAACATGCTCACCTTT	CAASAYNNAGNMLTF	TRAV29/DV5		TRAJ39	TRA
PBMC-Naive-alpha	171	85	0.0002	TGTGCAGGAGATCGAAATGCCAGACTCATGTTT	CAGDRNARLMF	TRAV27		TRAJ31	TRA
PBMC-Naive-alpha	172	85	0.0002	TGTGCAATGAGAGAGATGGGCTACTATGGCCAGAAGCTGCTCTTT	CAMREMGYYGQKLLF	TRAV14/DV4		TRAJ16	TRA
PBMC-Naive-alpha	173	84	0.0002	TGTGCTGTGAGGCGGACCGGTAACCAGTTCTATTTT	CAVRRTGNQFYF	TRAV21		TRAJ49	TRA
PBMC-Naive-alpha	174	83	0.0002	TGTGCTCTCCTCGCTACAAACAAGCTCATCTTT	CALLATNKLIF	TRAV38-2/DV8		TRAJ32	TRA
PBMC-Naive-alpha	175	83	0.0002	TGTGCTGGGCCGCCCAAAAACCAGTACAATAACAATGACATGCGCTTT	CAGPPKNQYNNNDMRF	TRAV35		TRAJ43	TRA
PBMC-Naive-alpha	176	82	0.0002	TGTGCTTATAAGCCGAATTATGGAGGAAGCCAAGGAAATCTCATCTTT	CAYKPNYGGSQGNLIF	TRAV38-2/DV8		TRAJ42	TRA
PBMC-Naive-alpha	177	82	0.0002	TGTGCACACCCCCCGGGCAGCTGGGGGAAATTGCAGTTT	CAHPPGSWGKLQF	TRAV12-3		TRAJ24	TRA
PBMC-Naive-alpha	178	82	0.0002	TGTGCCTCCATGGATAGCAACTATCAGTTAATCTGG	CASMDSNYQLIW	TRAV1-2		TRAJ33	TRA
PBMC-Naive-alpha	179	82	0.0002	TGTGCTGTGGGTCTGTATACTGGAGCCAATAGTAAGCTGACATTT	CAVGLYTGANSKLTF	TRAV21		TRAJ56	TRA
PBMC-Naive-alpha	180	81	0.0002	TGCCTCGTGGGTGACAGCAGTGCTTCCAAGATAATCTTT	CLVGDSSASKIIF	TRAV4		TRAJ3	TRA
PBMC-Naive-alpha	181	81	0.0002	TGTGCTGTGATTTTCGACAGAGGCTCAACCCTGGGGAGGCTATACTTT	CAVIFDRGSTLGRLYF	TRAV21		TRAJ18	TRA
PBMC-Naive-alpha	182	80	0.0002	TGTGCAGAGCGCCTCTATGGGAACAACAGACTCGCTTTT	CAERLYGNNRLAF	TRAV5		TRAJ7	TRA
PBMC-Naive-alpha	183	79	0.0002	TGTGTGGTGGCCCCCAGAGGAGGAAACAAACTCACCTTT	CVVAPRGGNKLTF	TRAV10		TRAJ10	TRA
PBMC-Naive-alpha	184	79	0.0002	TGTGCTGTGCCAAATTCCGGGTATGCACTCAACTTC	CAVPNSGYALNF	TRAV20		TRAJ41	TRA
PBMC-Naive-alpha	185	79	0.0002	TGTGCTGTGAACGACATTCTGAACACAGGCTTTCAGAAACTTGTATTT	CAVNDILNTGFQKLVF	TRAV21		TRAJ8	TRA
PBMC-Naive-alpha	186	79	0.0002	TGTGCTGTGGAGTCTTATGGGTCCAAAGCTGCAGGCAACAAGCTAACTTTT	CAVESYGSKAAGNKLTF	TRAV2		TRAJ17	TRA
PBMC-Naive-alpha	187	79	0.0002	TGTGTGGTGAGGGGAGGAAGCCAAGGAAATCTCATCTTT	CVVRGGSQGNLIF	TRAV10		TRAJ42	TRA
PBMC-Naive-alpha	188	78	0.0002	TGTGCTGTGAACTACAATGACATGCGCTTT	CAVNYNDMRF	TRAV21		TRAJ43	TRA
PBMC-Naive-alpha	189	78	0.0002	TGTGCTGTGGAGGACACGGGCAGGAGAGCACTTACTTTT	CAVEDTGRRALTF	TRAV21		TRAJ5	TRA
PBMC-Naive-alpha	190	78	0.0002	TGTGCTGTGAACACCAATGCAGGCAAATCAACCTTT	CAVNTNAGKSTF	TRAV35		TRAJ27	TRA
PBMC-Naive-alpha	191	77	0.0002	TGTGCTTATAGGATCCCGAACACCGGTAACCAGTTCTATTTT	CAYRIPNTGNQFYF	TRAV38-2/DV8		TRAJ49	TRA
PBMC-Naive-alpha	192	77	0.0002	TGTGGCACAGAGCTCGATTCAGGAACCTACAAATACATCTTT	CGTELDSGTYKYIF	TRAV30		TRAJ40	TRA
PBMC-Naive-alpha	193	77	0.0002	TGTGCCCTGACTACCGGCACTGCCAGTAAACTCACCTTT	CALTTGTASKLTF	TRAV21		TRAJ44	TRA
PBMC-Naive-alpha	194	77	0.0002	TGTGCTTATAGGAGCAACACTGGAGCCAATAGTAAGCTGACATTT	CAYRSNTGANSKLTF	TRAV38-2/DV8		TRAJ56	TRA
PBMC-Naive-alpha	195	76	0.0002	TGTGCAGAAACCAATGCAGGCAACATGCTCACCTTT	CAETNAGNMLTF	TRAV5		TRAJ39	TRA
PBMC-Naive-alpha	196	76	0.0002	TGTGCTCTGAGTCTAATCGGCGGATCTGAAAAGCTGGTCTTT	CALSLIGGSEKLVF	TRAV9-2		TRAJ57	TRA
PBMC-Naive-alpha	197	76	0.0002	TGTGCTGTGGATAACTATGGTCAGAATTTTGTCTTT	CAVDNYGQNFVF	TRAV2		TRAJ26	TRA
PBMC-Naive-alpha	198	75	0.0002	TGTGCAGCAAGTGCAGGGGGTGGTACTAGCTATGGAAAGCTGACATTT	CAASAGGGTSYGKLTF	TRAV13-1		TRAJ52	TRA
PBMC-Naive-alpha	199	75	0.0002	TGTGCTCTTGGGGAACTATGGAATTATGGAGGAAGCCAAGGAAATCTCATCTTT	CALGELWNYGGSQGNLIF	TRAV38-2/DV8		TRAJ42	TRA
PBMC-Naive-alpha	200	75	0.0002	TGTGCTGTGAGAGCCGGCGACTACAAGCTCAGCTTT	CAVRAGDYKLSF	TRAV1-2		TRAJ20	TRA
PBMC-Naive-alpha	201	74	0.0002	TGTGCTGTGGAGGATGAGAACGCCAGACTCATGTTT	CAVEDENARLMF	TRAV2		TRAJ31	TRA
PBMC-Naive-alpha	202	74	0.0002	TGTGCTCTGAGTGCTGGTGGTACTAGCTATGGAAAGCTGACATTT	CALSAGGTSYGKLTF	TRAV9-2		TRAJ52	TRA
PBMC-Naive-alpha	203	73	0.0002	TGTGCTCTAAGGGTAGGAAGCCAAGGAAATCTCATCTTT	CALRVGSQGNLIF	TRAV16		TRAJ42	TRA
PBMC-Naive-alpha	204	73	0.0002	TGTGCTGTGCGGGGACCCTATGGTCAGAATTTTGTCTTT	CAVRGPYGQNFVF	TRAV20		TRAJ26	TRA
PBMC-Naive-alpha	205	73	0.0002	TGTGCTTGGGGCAAAGCTGCAGGCAACAAGCTAACTTTT	CAWGKAAGNKLTF	TRAV21		TRAJ17	TRA
PBMC-Naive-alpha	206	72	0.0002	TGTGCAGAGACGGGACTCACGGGAGGAGGAAACAAACTCACCTTT	CAETGLTGGGNKLTF	TRAV5		TRAJ10	TRA
PBMC-Naive-alpha	207	72	0.0002	TGTGCTGTGATCCATCCTGGTGGTACTAGCTATGGAAAGCTGACATTT	CAVIHPGGTSYGKLTF	TRAV21		TRAJ52	TRA
PBMC-Naive-alpha	208	72	0.0002	TGTGCTGTGCTGGGCAACTATCAGTTAATCTGG	CAVLGNYQLIW	TRAV21		TRAJ33	TRA
PBMC-Naive-alpha	209	72	0.0002	TGTGTGGTGAGCGCGTGGTTCGGCGGAGGTGCTGACGGACTCACCTTT	CVVSAWFGGGADGLTF	TRAV10		TRAJ45	TRA
PBMC-Naive-alpha	210	72	0.0002	TGTGCTTATAAGGGAGAAACCAGTGGCTCTAGGTTGACCTTT	CAYKGETSGSRLTF	TRAV38-2/DV8		TRAJ58	TRA
PBMC-Naive-alpha	211	72	0.0002	TGTGCTTTCATCCCTGGTGGTACTAGCTATGGAAAGCTGACATTT	CAFIPGGTSYGKLTF	TRAV38-1		TRAJ52	TRA
PBMC-Naive-alpha	212	71	0.0002	TGTGCAATGAGAGTGGATGCAGGCAACATGCTCACCTTT	CAMRVDAGNMLTF	TRAV14/DV4		TRAJ39	TRA
PBMC-Naive-alpha	213	71	0.0002	TGTGCTCTGAGTGATTCAGGATACAGCACCCTCACCTTT	CALSDSGYSTLTF	TRAV9-2		TRAJ11	TRA
PBMC-Naive-alpha	214	71	0.0002	TGTGCTGTGCGGGATAGCAACTATCAGTTAATCTGG	CAVRDSNYQLIW	TRAV1-2		TRAJ33	TRA
PBMC-Naive-alpha	215	71	0.0002	TGTGCTACGGACCCCCAGGGAGGAAAGCTTATCTTC	CATDPQGGKLIF	TRAV17		TRAJ23	TRA
PBMC-Naive-alpha	216	71	0.0002	TGTGCTGTGGTCTCAGGAACCTACAAATACATCTTT	CAVVSGTYKYIF	TRAV1-2		TRAJ40	TRA
PBMC-Naive-alpha	217	71	0.0002	TGTGCTTTGATGGGAACCTACAAATACATCTTT	CALMGTYKYIF	TRAV38-2/DV8		TRAJ40	TRA
PBMC-Naive-alpha	218	71	0.0002	TGTGCTACGGACGGGAAGGGATACAGCACCCTCACCTTT	CATDGKGYSTLTF	TRAV17		TRAJ11	TRA
PBMC-Naive-alpha	219	70	0.0002	TGTGCAGCAACCCGAACTGGGGCAAACAACCTCTTCTTT	CAATRTGANNLFF	TRAV13-1		TRAJ36	TRA
PBMC-Naive-alpha	220	70	0.0002	TGTGCTCTGAGTGAGGACGAAACCTCCTACGACAAGGTGATATTT	CALSEDETSYDKVIF	TRAV19		TRAJ50	TRA
PBMC-Naive-alpha	221	70	0.0002	TGTGTGGTGAACAGTCCTCACAGCAGTGCTTCCAAGATAATCTTT	CVVNSPHSSASKIIF	TRAV12-1		TRAJ3	TRA
PBMC-Naive-alpha	222	70	0.0002	TGTGCTGTGAACACCGGTAACCAGTTCTATTTT	CAVNTGNQFYF	TRAV22		TRAJ49	TRA
PBMC-Naive-alpha	223	69	0.0002	TGTGTGGTGACCAACTTCACGGGAGGAGGAAACAAACTCACCTTT	CVVTNFTGGGNKLTF	TRAV10		TRAJ10	TRA
PBMC-Naive-alpha	224	69	0.0002	TGCCTCCCATCTTCTGCTGGCAACAACCGTAAGCTGATTTGG	CLPSSAGNNRKLIW	TRAV4		TRAJ38	TRA
PBMC-Naive-alpha	225	69	0.0002	TGTGCTGTGGGAGGATACAGCACCCTCACCTTT	CAVGGYSTLTF	TRAV21		TRAJ11	TRA
PBMC-Naive-alpha	226	68	0.0002	TGTGCAGCAAGTAACGACTACAAGCTCAGCTTT	CAASNDYKLSF	TRAV13-1		TRAJ20	TRA
PBMC-Naive-alpha	227	68	0.0002	TGTGCAGACTCATCAGGAGGAAGCTACATACCTACATTT	CADSSGGSYIPTF	TRAV5		TRAJ6	TRA
PBMC-Naive-alpha	228	68	0.0002	TGCATCGTCAGAAGAGGACTTATGGGCGACAAGCTCATCTTT	CIVRRGLMGDKLIF	TRAV26-1		TRAJ34	TRA
PBMC-Naive-alpha	229	68	0.0002	TGTGCTCTGAGAGGCTCTTCAGGAAACACACCTCTTGTCTTT	CALRGSSGNTPLVF	TRAV9-2		TRAJ29	TRA
PBMC-Naive-alpha	230	67	0.0002	TGTGCAGCAAGGGGAATAACTGGGGCAAACAACCTCTTCTTT	CAARGITGANNLFF	TRAV23/DV6		TRAJ36	TRA
PBMC-Naive-alpha	231	67	0.0002	TGTGCCCTCTGGATCAATGCCAGACTCATGTTT	CALWINARLMF	TRAV38-2/DV8		TRAJ31	TRA
PBMC-Naive-alpha	232	67	0.0002	TGTGCAGCAAGTGCTGGGGGTTACCAGAAAGTTACCTTT	CAASAGGYQKVTF	TRAV13-1		TRAJ13	TRA
PBMC-Naive-alpha	233	67	0.0002	TGTGCAGAGTTACAAGAAACCAGTGGCTCTAGGTTGACCTTT	CAELQETSGSRLTF	TRAV13-2		TRAJ58	TRA
PBMC-Naive-alpha	234	67	0.0002	TGTGCTGTGAGTGGGATGGATAGCAGCTATAAATTGATCTTC	CAVSGMDSSYKLIF	TRAV21		TRAJ12	TRA
PBMC-Naive-alpha	235	67	0.0002	TGTGCCGTGAACATGATCAAAGCTGCAGGCAACAAGCTAACTTTT	CAVNMIKAAGNKLTF	TRAV12-2		TRAJ17	TRA
PBMC-Naive-alpha	236	66	0.0002	TGTGCTTTCAAACACTCAGGAACCTACAAATACATCTTT	CAFKHSGTYKYIF	TRAV38-1		TRAJ40	TRA
PBMC-Naive-alpha	237	66	0.0002	TGTGCTGTGATAGGACACGACTACAAGCTCAGCTTT	CAVIGHDYKLSF	TRAV1-2		TRAJ20	TRA
PBMC-Naive-alpha	238	66	0.0002	TGTGCTGTGACTATTATGGATAGCAACTATCAGTTAATCTGG	CAVTIMDSNYQLIW	TRAV21		TRAJ33	TRA
PBMC-Naive-alpha	239	66	0.0002	TGTGCTGCCACTAATGCTGGTGGTACTAGCTATGGAAAGCTGACATTT	CAATNAGGTSYGKLTF	TRAV36/DV7		TRAJ52	TRA
PBMC-Naive-alpha	240	66	0.0002	TGCCTCGTGGGTGGAAACGACTACAAGCTCAGCTTT	CLVGGNDYKLSF	TRAV4		TRAJ20	TRA
PBMC-Naive-alpha	241	66	0.0002	TGTGCAATGAGCGCGCAAGAAGTGGATAGCAGCTATAAATTGATCTTC	CAMSAQEVDSSYKLIF	TRAV12-3		TRAJ12	TRA
PBMC-Naive-alpha	242	66	0.0002	TGTGCTTCGAACACCGGTAACCAGTTCTATTTT	CASNTGNQFYF	TRAV38-2/DV8		TRAJ49	TRA
PBMC-Naive-alpha	243	65	0.0002	TGTGCAGCAATCCCTGGGGCTGGGAGTTACCAACTCACTTTC	CAAIPGAGSYQLTF	TRAV29/DV5		TRAJ28	TRA
PBMC-Naive-alpha	244	65	0.0002	TGTGCTGTGCGGACGTACAATAACAATGACATGCGCTTT	CAVRTYNNNDMRF	TRAV20		TRAJ43	TRA
PBMC-Naive-alpha	245	65	0.0002	TGTGCAGAGAGTAGGAACCAGGGAGGAAAGCTTATCTTC	CAESRNQGGKLIF	TRAV5		TRAJ23	TRA
PBMC-Naive-alpha	246	65	0.0002	TGTGCAGAGTTTTATGGTGGTGCTACAAACAAGCTCATCTTT	CAEFYGGATNKLIF	TRAV13-2		TRAJ32	TRA
PBMC-Naive-alpha	247	65	0.0002	TGTGCTGTGAGGCCTGGCAACACAGGCAAACTAATCTTT	CAVRPGNTGKLIF	TRAV21		TRAJ37	TRA
PBMC-Naive-alpha	248	65	0.0002	TGTGCTTATAGGAGAGGGGAATATGGAAACAAACTGGTCTTT	CAYRRGEYGNKLVF	TRAV38-2/DV8		TRAJ47	TRA
PBMC-Naive-alpha	249	64	0.0002	TGTGCAGGAGCTCGATCTAACGACTACAAGCTCAGCTTT	CAGARSNDYKLSF	TRAV27		TRAJ20	TRA
PBMC-Naive-alpha	250	64	0.0002	TGTGGAGCAGACATGTATAGTGGAGGTAGCAACTATAAACTGACATTT	CGADMYSGGSNYKLTF	TRAV34		TRAJ53	TRA
PBMC-Naive-alpha	251	64	0.0002	TGTGCAGAGAATTATGGTGGTGCTACAAACAAGCTCATCTTT	CAENYGGATNKLIF	TRAV13-2		TRAJ32	TRA
PBMC-Naive-alpha	252	64	0.0002	TGTGCTGTTCGAAATACTGGAGGCTTCAAAACTATCTTT	CAVRNTGGFKTIF	TRAV21		TRAJ9	TRA
PBMC-Naive-alpha	253	64	0.0002	TGTGCTCTGAATAACAATGCCAGACTCATGTTT	CALNNNARLMF	TRAV41		TRAJ31	TRA
PBMC-Naive-alpha	254	64	0.0002	TGTGCTCTGGATAATGCAGGCAACATGCTCACCTTT	CALDNAGNMLTF	TRAV9-2		TRAJ39	TRA
PBMC-Naive-alpha	255	63	0.0002	TGTGCTTTCCATCGGAATAACAATGCCAGACTCATGTTT	CAFHRNNNARLMF	TRAV1-2		TRAJ31	TRA
PBMC-Naive-alpha	256	63	0.0002	TGTGCAGCAAGCGGTAACAATGCCAGACTCATGTTT	CAASGNNARLMF	TRAV29/DV5		TRAJ31	TRA
PBMC-Naive-alpha	257	63	0.0002	TGTGCCGAGGAGGTTAATAATGCAGGCAACATGCTCACCTTT	CAEEVNNAGNMLTF	TRAV24		TRAJ39	TRA
PBMC-Naive-alpha	258	63	0.0002	TGTGCTGTCGTCACGGGAGGAGGAAACAAACTCACCTTT	CAVVTGGGNKLTF	TRAV21		TRAJ10	TRA
PBMC-Naive-alpha	259	62	0.0002	TGTGCTACGGACGCTAACGACTACAAGCTCAGCTTT	CATDANDYKLSF	TRAV17		TRAJ20	TRA
PBMC-Naive-alpha	260	62	0.0002	TGTGCTGTGGAAAGCAGTGCTTCCAAGATAATCTTT	CAVESSASKIIF	TRAV21		TRAJ3	TRA
PBMC-Naive-alpha	261	62	0.0002	TGTGCTTTCATGAGTAAGGGTGCTGGTGGTACTAGCTATGGAAAGCTGACATTT	CAFMSKGAGGTSYGKLTF	TRAV38-1		TRAJ52	TRA
PBMC-Naive-alpha	262	62	0.0002	TGTGCAGCTCTCCGTTCTGGGGGTTACCAGAAAGTTACCTTT	CAALRSGGYQKVTF	TRAV13-1		TRAJ13	TRA
PBMC-Naive-alpha	263	62	0.0002	TGTGCTGTGCGGAATAGTGGAGGTAGCAACTATAAACTGACATTT	CAVRNSGGSNYKLTF	TRAV36/DV7		TRAJ53	TRA
PBMC-Naive-alpha	264	62	0.0002	TGTGCTGTTTTGGATAGCAACTATCAGTTAATCTGG	CAVLDSNYQLIW	TRAV1-2		TRAJ33	TRA
PBMC-Naive-alpha	265	62	0.0002	TGTGCAGAGAGTATAAGAGACACGGGCAGGAGAGCACTTACTTTT	CAESIRDTGRRALTF	TRAV5		TRAJ5	TRA
PBMC-Naive-alpha	266	62	0.0002	TGTGCAGAGACTGGTTCTGCAAGGCAACTGACCTTT	CAETGSARQLTF	TRAV13-2		TRAJ22	TRA
PBMC-Naive-alpha	267	61	0.0002	TGTGCTGTGGAGTCCCTCCACCTCTTGGGAGCCCAGAAGCTGGTATTT	CAVESLHLLGAQKLVF	TRAV36/DV7		TRAJ54	TRA
PBMC-Naive-alpha	268	61	0.0002	TGTGCAGCAAGCCCTGCGGCCAGACTCATGTTT	CAASPAARLMF	TRAV13-1		TRAJ31	TRA
PBMC-Naive-alpha	269	61	0.0002	TGTGCTCTGAGTGAGGCGGGACAGGGAGCCCAGAAGCTGGTATTT	CALSEAGQGAQKLVF	TRAV19		TRAJ54	TRA
PBMC-Naive-alpha	270	61	0.0002	TGTGCAGCAAGTCGACGCGGTCAGAATTTTGTCTTT	CAASRRGQNFVF	TRAV13-1		TRAJ26	TRA
PBMC-Naive-alpha	271	60	0.0002	TGTGCAGCAAGTGGGGGAGGAAGCCAAGGAAATCTCATCTTT	CAASGGGSQGNLIF	TRAV13-1		TRAJ42	TRA
PBMC-Naive-alpha	272	60	0.0002	TGTGTGGTGAGAACAACTGACAGCTGGGGGAAATTGCAGTTT	CVVRTTDSWGKLQF	TRAV10		TRAJ24	TRA
PBMC-Naive-alpha	273	60	0.0002	TGTGCTTGTTTGGGAACCTACAAATACATCTTT	CACLGTYKYIF	TRAV38-2/DV8		TRAJ40	TRA
PBMC-Naive-alpha	274	60	0.0002	TGTGCAGAGAATAGTGGAGGTAGCAACTATAAACTGACATTT	CAENSGGSNYKLTF	TRAV13-2		TRAJ53	TRA
PBMC-Naive-alpha	275	60	0.0002	TGTGCTCTGAGTGATCAGGGCGGATCTGAAAAGCTGGTCTTT	CALSDQGGSEKLVF	TRAV9-2		TRAJ57	TRA
PBMC-Naive-alpha	276	60	0.0002	TGTGCTTATAGGAGCACCGGTAACCAGTTCTATTTT	CAYRSTGNQFYF	TRAV38-2/DV8		TRAJ49	TRA
PBMC-Naive-alpha	277	60	0.0002	TGTGCTTGTAACTTGAATGCAGGCAACATGCTCACCTTT	CACNLNAGNMLTF	TRAV38-2/DV8		TRAJ39	TRA
PBMC-Naive-alpha	278	60	0.0002	TGTGCTCTGACCCCGACTGGGGCAAACAACCTCTTCTTT	CALTPTGANNLFF	TRAV9-2		TRAJ36	TRA
PBMC-Naive-alpha	279	60	0.0002	TGTGCTCTACCATACAACTTCAACAAATTTTACTTT	CALPYNFNKFYF	TRAV9-2		TRAJ21	TRA
PBMC-Naive-alpha	280	59	0.0002	TGTGCTCTGAGTGATCACTCTAGGAATGACATGCGCTTT	CALSDHSRNDMRF	TRAV9-2		TRAJ43	TRA
PBMC-Naive-alpha	281	59	0.0002	TGTGCTCTCCTTAACACCAATGCAGGCAAATCAACCTTT	CALLNTNAGKSTF	TRAV16		TRAJ27	TRA
PBMC-Naive-alpha	282	59	0.0002	TGTGCTGTGGAGGACCGGGGTAACTATGGTCAGAATTTTGTCTTT	CAVEDRGNYGQNFVF	TRAV2		TRAJ26	TRA
PBMC-Naive-alpha	283	59	0.0002	TGTGTGGTGGCCTGGAACACCGACAAGCTCATCTTT	CVVAWNTDKLIF	TRAV12-1		TRAJ34	TRA
PBMC-Naive-alpha	284	59	0.0002	TGTGCAGCAGCCTTCTACAGCAGTGCTTCCAAGATAATCTTT	CAAAFYSSASKIIF	TRAV13-1		TRAJ3	TRA
PBMC-Naive-alpha	285	59	0.0002	TGTGCTGTGAGGATGGGCAACTTCAACAAATTTTACTTT	CAVRMGNFNKFYF	TRAV21		TRAJ21	TRA
PBMC-Naive-alpha	286	59	0.0002	TGTGCAGCAACTGACAGCTGGGGGAAATTGCAGTTT	CAATDSWGKLQF	TRAV13-1		TRAJ24	TRA
PBMC-Naive-alpha	287	58	0.0002	TGTGCGTGCATGGATAGCAACTATCAGTTAATCTGG	CACMDSNYQLIW	TRAV1-2		TRAJ33	TRA
PBMC-Naive-alpha	288	58	0.0002	TGTGCAGACGCCGGACCGTCTGGTGGCTACAATAAGCTGATTTTT	CADAGPSGGYNKLIF	TRAV5		TRAJ4	TRA
PBMC-Naive-alpha	289	58	0.0002	TGTGCTGTGGACTTGGGGAACTATGGTCAGAATTTTGTCTTT	CAVDLGNYGQNFVF	TRAV22		TRAJ26	TRA
PBMC-Naive-alpha	290	58	0.0002	TGCCTCGTGGCTCCCAACCAGGCAGGAACTGCTCTGATCTTT	CLVAPNQAGTALIF	TRAV4		TRAJ15	TRA
PBMC-Naive-alpha	291	58	0.0002	TGTGCTTATAGGAGCGCGCTCTATGGAGGAAGCCAAGGAAATCTCATCTTT	CAYRSALYGGSQGNLIF	TRAV38-2/DV8		TRAJ42	TRA
PBMC-Naive-alpha	292	58	0.0002	TGTGCTCTTTCCCTTCTCTCAGGAGGAAGCTACATACCTACATTT	CALSLLSGGSYIPTF	TRAV6		TRAJ6	TRA
PBMC-Naive-alpha	293	58	0.0002	TGTGCTTATAGGACTCCGTACAGCAGTGCTTCCAAGATAATCTTT	CAYRTPYSSASKIIF	TRAV38-2/DV8		TRAJ3	TRA
PBMC-Naive-alpha	294	58	0.0002	TGTGCTGTGCAGGCCATGGAATATGGAAACAAGCTGGTCTTT	CAVQAMEYGNKLVF	TRAV20		TRAJ47	TRA
PBMC-Naive-alpha	295	57	0.0002	TGTGCTCCCATGGATAGCAGCTATAAATTGATCTTC	CAPMDSSYKLIF	TRAV1-2		TRAJ12	TRA
PBMC-Naive-alpha	296	57	0.0002	TGTGCTTGCCTAGGAACCTACAAATACATCTTT	CACLGTYKYIF	TRAV38-2/DV8		TRAJ40	TRA
PBMC-Naive-alpha	297	57	0.0002	TGTGCTGTGCAGGCGGGTAACGACTACAAGCTCAGCTTT	CAVQAGNDYKLSF	TRAV20		TRAJ20	TRA
PBMC-Naive-alpha	298	57	0.0002	TGTGGGTGCATGGATAGCAACTATCAGTTAATCTGG	CGCMDSNYQLIW	TRAV1-2		TRAJ33	TRA
PBMC-Naive-alpha	299	57	0.0002	TGTGTGGTGACCATTAATGCAGGCAACATGCTCACCTTT	CVVTINAGNMLTF	TRAV10		TRAJ39	TRA
PBMC-Naive-alpha	300	57	0.0002	TGTGCTGTGGAGGATAACCAGGCAGGAACTGCTCTGATCTTT	CAVEDNQAGTALIF	TRAV2		TRAJ15	TRA
PBMC-Naive-alpha	301	57	0.0002	TGTGCTGGCTTGGATAGCAACTATCAGTTAATCTGG	CAGLDSNYQLIW	TRAV1-2		TRAJ33	TRA
PBMC-Naive-alpha	302	56	0.0002	TGTGCTCTGGGGGGGACCGGCACTGCCAGTAAACTCACCTTT	CALGGTGTASKLTF	TRAV9-2		TRAJ44	TRA
PBMC-Naive-alpha	303	56	0.0002	TGTGCTGTCTCACCTGCTGGCAACAACCGTAAGCTGATTTGG	CAVSPAGNNRKLIW	TRAV21		TRAJ38	TRA
PBMC-Naive-alpha	304	56	0.0002	TGTGTGGTGAACAGAGGTAACAATGCCAGACTCATGTTT	CVVNRGNNARLMF	TRAV12-1		TRAJ31	TRA
PBMC-Naive-alpha	305	56	0.0002	TGTGCTGCTATGGATAGCAACTATCAGTTAATCTGG	CAAMDSNYQLIW	TRAV1-2		TRAJ33	TRA
PBMC-Naive-alpha	306	56	0.0002	TGTGTCGGCTCTAGCAACACAGGCAAACTAATCTTT	CVGSSNTGKLIF	TRAV2		TRAJ37	TRA
PBMC-Naive-alpha	307	56	0.0002	TGTGGAGCAGACCTGGATAGCAGCTATAAATTGATCTTC	CGADLDSSYKLIF	TRAV34		TRAJ12	TRA
PBMC-Naive-alpha	308	56	0.0002	TGTGCAGCGCAGACCAATGCCAGACTCATGTTT	CAAQTNARLMF	TRAV29/DV5		TRAJ31	TRA
PBMC-Naive-alpha	309	56	0.0002	TGTGCTGTGGTCGCAAATACTGGAGGCTTCAAAACTATCTTT	CAVVANTGGFKTIF	TRAV2		TRAJ9	TRA
PBMC-Naive-alpha	310	56	0.0002	TGTGCAGCAAGCAAAGGAAACACAGGCAAACTAATCTTT	CAASKGNTGKLIF	TRAV29/DV5		TRAJ37	TRA
PBMC-Naive-alpha	311	56	0.0002	TGTGTGGTGGAGACTTCAGGATACAGCACCCTCACCTTT	CVVETSGYSTLTF	TRAV12-1		TRAJ11	TRA
PBMC-Naive-alpha	312	56	0.0002	TGTGCTCCTCGGTTGACCTTT	CAPRLTF	TRAV21		TRAJ58	TRA
PBMC-Naive-alpha	313	56	0.0002	TGTGCCGTCTATTCAGGAAACACACCTCTTGTCTTT	CAVYSGNTPLVF	TRAV9-2		TRAJ29	TRA
PBMC-Naive-alpha	314	56	0.0002	TGTGCTTATAGGAGCAGTTCAGGAGGAGGTGCTGACGGACTCACCTTT	CAYRSSSGGGADGLTF	TRAV38-2/DV8		TRAJ45	TRA
PBMC-Naive-alpha	315	55	0.0002	TGTGCTGTGAAAGAAACCAGTGGCTCTAGGTTGACCTTT	CAVKETSGSRLTF	TRAV21		TRAJ58	TRA
PBMC-Naive-alpha	316	55	0.0002	TCTTTTACAGGCAAACTAATCTTT	SFTGKLIF	TRAV21		TRAJ37	TRA
PBMC-Naive-alpha	317	55	0.0002	TGTGCAGAGAATGGTGGCTACAATAAGCTGATTTTT	CAENGGYNKLIF	TRAV5		TRAJ4	TRA
PBMC-Naive-alpha	318	55	0.0002	TGTGTTGTGAGTGATCCGAATAATGCAGGCAACATGCTCACCTTT	CVVSDPNNAGNMLTF	TRAV8-2		TRAJ39	TRA
PBMC-Naive-alpha	319	55	0.0002	TGTGCTGTGTATTCAGGAGGAGGTGCTGACGGACTCACCTTT	CAVYSGGGADGLTF	TRAV21		TRAJ45	TRA
PBMC-Naive-alpha	320	55	0.0002	TGTGCTCCGATGGATAGCAACTATCAGTTAATCTGG	CAPMDSNYQLIW	TRAV1-2		TRAJ33	TRA
PBMC-Naive-alpha	321	55	0.0002	TGTGCTCTCTTTTCTGGGGGTTACCAGAAAGTTACCTTT	CALFSGGYQKVTF	TRAV9-2		TRAJ13	TRA
PBMC-Naive-alpha	322	54	0.0001	TGTGCTACGCGAAACCAGGCAGGAACTGCTCTGATCTTT	CATRNQAGTALIF	TRAV17		TRAJ15	TRA
PBMC-Naive-alpha	323	54	0.0001	TGTGCCACACTGGGAACCTACAAATACATCTTT	CATLGTYKYIF	TRAV38-2/DV8		TRAJ40	TRA
PBMC-Naive-alpha	324	54	0.0001	TGTGCAGCAAGCGCAAACGACTACAAGCTCAGCTTT	CAASANDYKLSF	TRAV29/DV5		TRAJ20	TRA
PBMC-Naive-alpha	325	54	0.0001	TGTGCTGCCGCTGCCAATGACATGCGCTTT	CAAAANDMRF	TRAV21		TRAJ43	TRA
PBMC-Naive-alpha	326	54	0.0001	TGTGCTTATAGGAGCGGCTTTGTTAACTTTGGAAATGAGAAATTAACCTTT	CAYRSGFVNFGNEKLTF	TRAV38-2/DV8		TRAJ48	TRA
PBMC-Naive-alpha	327	54	0.0001	TGTGCTCTCCGGATGGATAGCAGCTATAAATTGATCTTC	CALRMDSSYKLIF	TRAV9-2		TRAJ12	TRA
PBMC-Naive-alpha	328	54	0.0001	TGTGCTTATAGGAGCAAGGGCGGATCTGAAAAGCTGGTCTTT	CAYRSKGGSEKLVF	TRAV38-2/DV8		TRAJ57	TRA
PBMC-Naive-alpha	329	54	0.0001	TGCCTCGTGGGTGGACGACGGACTGGGGCAAACAACCTCTTCTTT	CLVGGRRTGANNLFF	TRAV4		TRAJ36	TRA
PBMC-Naive-alpha	330	54	0.0001	TGTGCTTTCATGACAAATGCTGGTGGTACTAGCTATGGAAAGCTGACATTT	CAFMTNAGGTSYGKLTF	TRAV38-1		TRAJ52	TRA
PBMC-Naive-alpha	331	54	0.0001	TGTGCTGTGGATAGCAACTATCAGTTAATCTGG	CAVDSNYQLIW	TRAV1-2		TRAJ33	TRA
PBMC-Naive-alpha	332	54	0.0001	TGTGCAACCTTTAACACCGACAAGCTCATCTTT	CATFNTDKLIF	TRAV13-1		TRAJ34	TRA
PBMC-Naive-alpha	333	54	0.0001	TGTGCTGTCCGAGGGTGGGGAAGCCAAGGAAATCTCATCTTT	CAVRGWGSQGNLIF	TRAV41		TRAJ42	TRA
PBMC-Naive-alpha	334	54	0.0001	TGTGCTGTGGAGACTGGAGCCAATAGTAAGCTGACATTT	CAVETGANSKLTF	TRAV22		TRAJ56	TRA
PBMC-Naive-alpha	335	53	0.0001	TGTGCTCTGAGCGGGGATAGCAGCTATAAATTGATCTTC	CALSGDSSYKLIF	TRAV9-2		TRAJ12	TRA
PBMC-Naive-alpha	336	53	0.0001	TGTGCTTTCAGAGGGTATAATACCGGCACTGCCAGTAAACTCACCTTT	CAFRGYNTGTASKLTF	TRAV38-1		TRAJ44	TRA
PBMC-Naive-alpha	337	53	0.0001	TGCCTCGTGGGTGTCTATAACCAGGGAGGAAAGCTTATCTTC	CLVGVYNQGGKLIF	TRAV4		TRAJ23	TRA
PBMC-Naive-alpha	338	53	0.0001	TGTGCTTTCATGAAGCATGGGGGGGATAGCAGCTATAAATTGATCTTC	CAFMKHGGDSSYKLIF	TRAV38-1		TRAJ12	TRA
PBMC-Naive-alpha	339	53	0.0001	TGTGCTCTTTTCGACACCAATGCAGGCAAATCAACCTTT	CALFDTNAGKSTF	TRAV38-2/DV8		TRAJ27	TRA
PBMC-Naive-alpha	340	53	0.0001	TGTGCTGTGGCAATCACCGGAGGCTTCAAAACTATCTTT	CAVAITGGFKTIF	TRAV21		TRAJ9	TRA
PBMC-Naive-alpha	341	53	0.0001	TGTGCAGCACCCGGTAGCAACTATAAACTGACATTT	CAAPGSNYKLTF	TRAV29/DV5		TRAJ53	TRA
PBMC-Naive-alpha	342	53	0.0001	TGTGCTTTAAAGGGAACCTACAAATACATCTTT	CALKGTYKYIF	TRAV38-2/DV8		TRAJ40	TRA
PBMC-Naive-alpha	343	53	0.0001	TGTGCAATGAGCGGAGGGAACACCGGTAACCAGTTCTATTTT	CAMSGGNTGNQFYF	TRAV12-3		TRAJ49	TRA
PBMC-Naive-alpha	344	53	0.0001	TGTGCTCTGAGTGATGGATCCAGAGACTACAAGCTCAGCTTT	CALSDGSRDYKLSF	TRAV9-2		TRAJ20	TRA
PBMC-Naive-alpha	345	53	0.0001	TGTGTGGTGAACCAGGCAGGAACTGCTCTGATCTTT	CVVNQAGTALIF	TRAV12-1		TRAJ15	TRA
PBMC-Naive-alpha	346	53	0.0001	TGTGCTGTGATAGGCTTTGGGAATGTGCTGCATTGC	CAVIGFGNVLHC	TRAV21		TRAJ35	TRA
PBMC-Naive-alpha	347	53	0.0001	TGTGCAGCAAGCATGAACTATGGTCAGAATTTTGTCTTT	CAASMNYGQNFVF	TRAV23/DV6		TRAJ26	TRA
PBMC-Naive-alpha	348	53	0.0001	TGTGCTGCGAGGGGTGGCTCTAGCAACACAGGCAAACTAATCTTT	CAARGGSSNTGKLIF	TRAV21		TRAJ37	TRA
PBMC-Naive-alpha	349	53	0.0001	TGTGCTGTATCAGGAGGAAGCTACATACCTACATTT	CAVSGGSYIPTF	TRAV21		TRAJ6	TRA
PBMC-Naive-alpha	350	52	0.0001	TGTGCTCTGAGGGGGAATAACAATGCCAGACTCATGTTT	CALRGNNNARLMF	TRAV9-2		TRAJ31	TRA
PBMC-Naive-alpha	351	52	0.0001	TGTGCTTATCACATGAACAGAGATGACAAGATCATCTTT	CAYHMNRDDKIIF	TRAV38-2/DV8		TRAJ30	TRA
PBMC-Naive-alpha	352	52	0.0001	TGTGCTTATAGGTCTCCGTTCTCTAGCAACACAGGCAAACTAATCTTT	CAYRSPFSSNTGKLIF	TRAV38-2/DV8		TRAJ37	TRA
PBMC-Naive-alpha	353	52	0.0001	TGCCTCGTGGGTGACATGGACACGGGCAGGAGAGCACTTACTTTT	CLVGDMDTGRRALTF	TRAV4		TRAJ5	TRA
PBMC-Naive-alpha	354	52	0.0001	TGTGCTCTGATCCCTCGGCGAGGAGGTGCTGACGGACTCACCTTT	CALIPRRGGADGLTF	TRAV9-2		TRAJ45	TRA
PBMC-Naive-alpha	355	52	0.0001	TGTGCTCTGAGCGGATACAGCACCCTCACCTTT	CALSGYSTLTF	TRAV9-2		TRAJ11	TRA
PBMC-Naive-alpha	356	52	0.0001	TGTGCTACGGAAACTGGGGCAAACAACCTCTTCTTT	CATETGANNLFF	TRAV20		TRAJ36	TRA
PBMC-Naive-alpha	357	52	0.0001	TGTGCAGCATATTCAGGAGGAGGTGCTGACGGACTCACCTTT	CAAYSGGGADGLTF	TRAV29/DV5		TRAJ45	TRA
PBMC-Naive-alpha	358	52	0.0001	TGTGCTCGCAAGGGGGGAGGAGGAAACAAACTCACCTTT	CARKGGGGNKLTF	TRAV9-2		TRAJ10	TRA
PBMC-Naive-alpha	359	52	0.0001	TGTGCTGTTTCGAACACCGGTAACCAGTTCTATTTT	CAVSNTGNQFYF	TRAV21		TRAJ49	TRA
PBMC-Naive-alpha	360	52	0.0001	TGTGCTGCCGCCCCAAACAGCTGGGGGAAATTGCAGTTT	CAAAPNSWGKLQF	TRAV1-2		TRAJ24	TRA
PBMC-Naive-alpha	361	52	0.0001	TGTGCTCTGAGTGGAATGGACACGGGCAGGAGAGCACTTACTTTT	CALSGMDTGRRALTF	TRAV9-2		TRAJ5	TRA
PBMC-Naive-alpha	362	52	0.0001	TGTGCAGCAAGTAGAGGAGGAAGCTACATACCTACATTT	CAASRGGSYIPTF	TRAV13-1		TRAJ6	TRA
PBMC-Naive-alpha	363	52	0.0001	TGTGTGTTGTACTATGGGAACAACAGACTCGCTTTT	CVLYYGNNRLAF	TRAV10		TRAJ7	TRA
PBMC-Naive-alpha	364	52	0.0001	TGTTCTTCAAACAAACTGGTCTTT	CSSNKLVF	TRAV21		TRAJ47	TRA
PBMC-Naive-alpha	365	52	0.0001	TGTGCAGCTCTATATAACCAGGGAGGAAAGCTTATCTTC	CAALYNQGGKLIF	TRAV13-1		TRAJ23	TRA
PBMC-Naive-alpha	366	52	0.0001	TGTGCTGGTACCTACCAGGGAGGAAAGCTTATCTTC	CAGTYQGGKLIF	TRAV21		TRAJ23	TRA
PBMC-Naive-alpha	367	51	0.0001	TGTGCTTATAGGATTAGAGATGACAAGATCATCTTT	CAYRIRDDKIIF	TRAV38-2/DV8		TRAJ30	TRA
PBMC-Naive-alpha	368	51	0.0001	TGCGCTGGCCCGGAGAGCAACTATCAGTTAATCTGG	CAGPESNYQLIW	TRAV1-1		TRAJ33	TRA
PBMC-Naive-alpha	369	51	0.0001	TGTGCTGTGACTGCGTACAGCAGTGCTTCCAAGATAATCTTT	CAVTAYSSASKIIF	TRAV21		TRAJ3	TRA
PBMC-Naive-alpha	370	51	0.0001	TGTGCTACGGATCCTAACAATGCCAGACTCATGTTT	CATDPNNARLMF	TRAV17		TRAJ31	TRA
PBMC-Naive-alpha	371	51	0.0001	TGTGCTGTGGGATACAGCACCCTCACCTTT	CAVGYSTLTF	TRAV2		TRAJ11	TRA
PBMC-Naive-alpha	372	51	0.0001	TGTGCTTATAGGAGCGCGATTGGTGCAGGCAACAAGCTAACTTTT	CAYRSAIGAGNKLTF	TRAV38-2/DV8		TRAJ17	TRA
PBMC-Naive-alpha	373	51	0.0001	TGCCCGGACACGGGCAGGAGAGCACTTACTTTT	CPDTGRRALTF	TRAV4		TRAJ5	TRA
PBMC-Naive-alpha	374	51	0.0001	TGTGCTTATAGGAGACCCGGTAACCAGTTCTATTTT	CAYRRPGNQFYF	TRAV38-2/DV8		TRAJ49	TRA
PBMC-Naive-alpha	375	51	0.0001	TGTGTGGTGACCACGGGAGGAGGAAACAAACTCACCTTT	CVVTTGGGNKLTF	TRAV10		TRAJ10	TRA
PBMC-Naive-alpha	376	51	0.0001	TGTGCTGTAACTGACAGCTGGGGGAAATTGCAGTTT	CAVTDSWGKLQF	TRAV2		TRAJ24	TRA
PBMC-Naive-alpha	377	51	0.0001	TGTGCTGTGGATGGGGACACACCTCTTGTCTTT	CAVDGDTPLVF	TRAV2		TRAJ29	TRA
PBMC-Naive-alpha	378	51	0.0001	TGTGCAGCAAGTAATGGTCAGGGCGGATCTGAAAAGCTGGTCTTT	CAASNGQGGSEKLVF	TRAV13-1		TRAJ57	TRA
PBMC-Naive-alpha	379	51	0.0001	TGTGCTGTTGTCGATAGCAACTATCAGTTAATCTGG	CAVVDSNYQLIW	TRAV1-2		TRAJ33	TRA
PBMC-Naive-alpha	380	51	0.0001	TGTGCTGTGGGGTATTCAGGAGGAGGTGCTGACGGACTCACCTTT	CAVGYSGGGADGLTF	TRAV36/DV7		TRAJ45	TRA
PBMC-Naive-alpha	381	51	0.0001	TGTGGCACAGAGATCTTGGCGCGGGGAGGAAAGCTTATCTTC	CGTEILARGGKLIF	TRAV30		TRAJ23	TRA
PBMC-Naive-alpha	382	51	0.0001	TGTGCTCGTTCCTCTTTCGGTGGCTACAATAAGCTGATTTTT	CARSSFGGYNKLIF	TRAV9-2		TRAJ4	TRA
PBMC-Naive-alpha	383	50	0.0001	TGTGCTTATAGACGGGGAACCTACAAATACATCTTT	CAYRRGTYKYIF	TRAV38-2/DV8		TRAJ40	TRA
PBMC-Naive-alpha	384	50	0.0001	TGTGCAGCAAGGTTGCCGGGTGGTGCTACAAACAAGCTCATCTTT	CAARLPGGATNKLIF	TRAV13-1		TRAJ32	TRA
PBMC-Naive-alpha	385	50	0.0001	TGTGTGGTGAGCGCAAGGAATAATGCAGGCAACATGCTCACCTTT	CVVSARNNAGNMLTF	TRAV10		TRAJ39	TRA
PBMC-Naive-alpha	386	50	0.0001	TGTGCAGAGAGGATGGACAATGCCAGACTCATGTTT	CAERMDNARLMF	TRAV5		TRAJ31	TRA
PBMC-Naive-alpha	387	50	0.0001	TGTGCTTATAGGAGCGCGAAGGGCCGTAACCAGTTCTATTTT	CAYRSAKGRNQFYF	TRAV38-2/DV8		TRAJ49	TRA
PBMC-Naive-alpha	388	50	0.0001	TGTGCTGTGGATGGTGGTGCTACAAACAAGCTCATCTTT	CAVDGGATNKLIF	TRAV2		TRAJ32	TRA
PBMC-Naive-alpha	389	50	0.0001	TGTGCCGTGACGGATAGCAACTATCAGTTAATCTGG	CAVTDSNYQLIW	TRAV12-2		TRAJ33	TRA
PBMC-Naive-alpha	390	50	0.0001	TGCCTCGTGGTAGCGGGTTCTGCAAGGCAACTGACCTTT	CLVVAGSARQLTF	TRAV4		TRAJ22	TRA
PBMC-Naive-alpha	391	50	0.0001	TGTGCTGTGAGGGGGTCAGGAGGAAGCTACATACCTACATTT	CAVRGSGGSYIPTF	TRAV21		TRAJ6	TRA
PBMC-Naive-alpha	392	50	0.0001	TGTGCTCTGAGTGAAGGGGGAAGCCAAGGAAATCTCATCTTT	CALSEGGSQGNLIF	TRAV9-2		TRAJ42	TRA
PBMC-Naive-alpha	393	50	0.0001	TGTGGCACAGTATCTCCTCGGGATGCCAGACTCATGTTT	CGTVSPRDARLMF	TRAV30		TRAJ31	TRA
PBMC-Naive-alpha	394	49	0.0001	TGTGCTGTGGAGGATAACAGGAAGCTTATCTTC	CAVEDNRKLIF	TRAV2		TRAJ23	TRA
PBMC-Naive-alpha	395	49	0.0001	TGTGCGTGTCTGGGAACCTACAAATACATCTTT	CACLGTYKYIF	TRAV38-2/DV8		TRAJ40	TRA
PBMC-Naive-alpha	396	49	0.0001	TGTGCTTTAATGGATAGCAACTATCAGTTAATCTGG	CALMDSNYQLIW	TRAV1-2		TRAJ33	TRA
PBMC-Naive-alpha	397	49	0.0001	TGTGCTGTGGAGGATAACGACTACAAGCTCAGCTTT	CAVEDNDYKLSF	TRAV2		TRAJ20	TRA
PBMC-Naive-alpha	398	49	0.0001	TGCATCCTGAGAGACCCTCCTCGAGGAACCTCCTACGACAAGGTGATATTT	CILRDPPRGTSYDKVIF	TRAV26-2		TRAJ50	TRA
PBMC-Naive-alpha	399	49	0.0001	TGTGCTCTCCCTCGGGCTTTTACCGGCACTGCCAGTAAACTCACCTTT	CALPRAFTGTASKLTF	TRAV35		TRAJ44	TRA
PBMC-Naive-alpha	400	49	0.0001	TGTGCTTATAGGGCGGATTATGGAGGAAGCCAAGGAAATCTCATCTTT	CAYRADYGGSQGNLIF	TRAV38-2/DV8		TRAJ42	TRA
PBMC-Naive-alpha	401	49	0.0001	TGTGCTGGGCAGGTTAATGCAGGCAACATGCTCACCTTT	CAGQVNAGNMLTF	TRAV35		TRAJ39	TRA
PBMC-Naive-alpha	402	49	0.0001	TGCCTCGTGGGTGACCTCTTTTCAGATGGCCAGAAGCTGCTCTTT	CLVGDLFSDGQKLLF	TRAV4		TRAJ16	TRA
PBMC-Naive-alpha	403	49	0.0001	TGTGCTCTGAGTGAGCAGGCAGGAACTGCTCTGATCTTT	CALSEQAGTALIF	TRAV9-2		TRAJ15	TRA
PBMC-Naive-alpha	404	49	0.0001	TGTGCTCTGAGTGGTGGCTCAACCCTGGGGAGGCTATACTTT	CALSGGSTLGRLYF	TRAV9-2		TRAJ18	TRA
PBMC-Naive-alpha	405	49	0.0001	TGTGCCGTGGACGAGGGAGCCCAGAAGCTGGTATTT	CAVDEGAQKLVF	TRAV39		TRAJ54	TRA
PBMC-Naive-alpha	406	48	0.0001	TGTGCTGTGAGAAGGAACACCGGTAACCAGTTCTATTTT	CAVRRNTGNQFYF	TRAV21		TRAJ49	TRA
PBMC-Naive-alpha	407	48	0.0001	TGTGCTGGGGCTGGGAGTTACCAACTCACTTTC	CAGAGSYQLTF	TRAV36/DV7		TRAJ28	TRA
PBMC-Naive-alpha	408	48	0.0001	TGTGCCCAGAAGCCCCGAACCGGCACTGCCAGTAAACTCACCTTT	CAQKPRTGTASKLTF	TRAV13-2		TRAJ44	TRA
PBMC-Naive-alpha	409	48	0.0001	TGTGCTCTTCTCGATAACTATGGTCAGAATTTTGTCTTT	CALLDNYGQNFVF	TRAV16		TRAJ26	TRA
PBMC-Naive-alpha	410	48	0.0001	TGTGCTGTGGAGGCCGGTGGTGCTACAAACAAGCTCATCTTT	CAVEAGGATNKLIF	TRAV2		TRAJ32	TRA
PBMC-Naive-alpha	411	48	0.0001	TGTGGCACAGACCAGAAGGGTAACAATGACATGCGCTTT	CGTDQKGNNDMRF	TRAV30		TRAJ43	TRA
PBMC-Naive-alpha	412	48	0.0001	TGTGCTTTCATGAGCTACACCAATGCAGGCAAATCAACCTTT	CAFMSYTNAGKSTF	TRAV38-1		TRAJ27	TRA
PBMC-Naive-alpha	413	48	0.0001	TGTGCAGCATTCCTCGACAGAGGCTCAACCCTGGGGAGGCTATACTTT	CAAFLDRGSTLGRLYF	TRAV13-1		TRAJ18	TRA
PBMC-Naive-alpha	414	48	0.0001	TGTGGCACAGAGGAAATTCAGGGAGCCCAGAAGCTGGTATTT	CGTEEIQGAQKLVF	TRAV30		TRAJ54	TRA
PBMC-Naive-alpha	415	48	0.0001	TGTGCAGAGAATACCGACAGAGGCTCAACCCTGGGGAGGCTATACTTT	CAENTDRGSTLGRLYF	TRAV13-2		TRAJ18	TRA
PBMC-Naive-alpha	416	48	0.0001	TGTGCTCTGATTTATCGGTTTTCAGATGGCCAGAAGCTGCTCTTT	CALIYRFSDGQKLLF	TRAV9-2		TRAJ16	TRA
PBMC-Naive-alpha	417	48	0.0001	TGCGCTGTGGGCGCCAGCAACTTCAACAAATTTTACTTT	CAVGASNFNKFYF	TRAV1-1		TRAJ21	TRA
PBMC-Naive-alpha	418	48	0.0001	TGTGCAGCAAGTAAAGGAGGAAGCTACATACCTACATTT	CAASKGGSYIPTF	TRAV13-1		TRAJ6	TRA
PBMC-Naive-alpha	419	48	0.0001	TGTGGCACAGAGATAGGGAATACCGGCACTGCCAGTAAACTCACCTTT	CGTEIGNTGTASKLTF	TRAV30		TRAJ44	TRA
PBMC-Naive-alpha	420	47	0.0001	TGTGCAGGGCTTCGGTATAACCAGGGAGGAAAGCTTATCTTC	CAGLRYNQGGKLIF	TRAV25		TRAJ23	TRA
PBMC-Naive-alpha	421	47	0.0001	TGTGCTGTGAATAACAATGCCAGACTCATGTTT	CAVNNNARLMF	TRAV41		TRAJ31	TRA
PBMC-Naive-alpha	422	47	0.0001	TGTGCTTATCGGGAATATGGAAACAAGCTGGTCTTT	CAYREYGNKLVF	TRAV38-2/DV8		TRAJ47	TRA
PBMC-Naive-alpha	423	47	0.0001	TGTGCTGCTGGTGGTACTAGCTATGGAAAGCTGACATTT	CAAGGTSYGKLTF	TRAV21		TRAJ52	TRA
PBMC-Naive-alpha	424	47	0.0001	TGTGTGGTGCCCCCGGGGGTGAGAGATGACAAGATCATCTTT	CVVPPGVRDDKIIF	TRAV10		TRAJ30	TRA
PBMC-Naive-alpha	425	47	0.0001	TGCCTCGTGGGTTTTTCTGGTTCTGCAAGGCAACTGACCTTT	CLVGFSGSARQLTF	TRAV4		TRAJ22	TRA
PBMC-Naive-alpha	426	47	0.0001	TGTGCTGGCCTTCCTGTTTCTGGTGGCTACAATAAGCTGATTTTT	CAGLPVSGGYNKLIF	TRAV20		TRAJ4	TRA
PBMC-Naive-alpha	427	47	0.0001	TGTGCAGCAATCCCGATGGATAGCAGCTATAAATTGATCTTC	CAAIPMDSSYKLIF	TRAV13-1		TRAJ12	TRA
PBMC-Naive-alpha	428	47	0.0001	TGTGCTGTGAGTTCTAACGACTACAAGCTCAGCTTT	CAVSSNDYKLSF	TRAV1-2		TRAJ20	TRA
PBMC-Naive-alpha	429	47	0.0001	TGTGCAGCAAGTCAAGGGGGTTACCAGAAAGTTACCTTT	CAASQGGYQKVTF	TRAV13-1		TRAJ13	TRA
PBMC-Naive-alpha	430	47	0.0001	TGTGCTGTGCTTCAGGGAGCCCAGAAGCTGGTATTT	CAVLQGAQKLVF	TRAV21		TRAJ54	TRA
PBMC-Naive-alpha	431	47	0.0001	TGTGCTGCTACTACGTATTCAGGAGGAGGTGCTGACGGACTCACCTTT	CAATTYSGGGADGLTF	TRAV20		TRAJ45	TRA
PBMC-Naive-alpha	432	47	0.0001	TGTGCAGGAGGGGCAAGATTAACCTTT	CAGGARLTF	TRAV27		TRAJ48	TRA
PBMC-Naive-alpha	433	47	0.0001	TGTGCTGGGCAGCTCGAAAACACACCTCTTGTCTTT	CAGQLENTPLVF	TRAV35		TRAJ29	TRA
PBMC-Naive-alpha	434	47	0.0001	TGTGCTGTGGGAACCGGTAACCAGTTCTATTTT	CAVGTGNQFYF	TRAV21		TRAJ49	TRA
PBMC-Naive-alpha	435	47	0.0001	TGTGCAGGGGCCCTCAAAGCTGCAGGCAACAAGCTAACTTTT	CAGALKAAGNKLTF	TRAV27		TRAJ17	TRA
PBMC-Naive-alpha	436	46	0.0001	TGTGCTGTGGAGGATCGCTTTGGGAATGTGCTGCATTGC	CAVEDRFGNVLHC	TRAV2		TRAJ35	TRA
PBMC-Naive-alpha	437	46	0.0001	TGTGCAGGAGGTTATAACCAGGGAGGAAAGCTTATCTTC	CAGGYNQGGKLIF	TRAV27		TRAJ23	TRA
PBMC-Naive-alpha	438	46	0.0001	TGCGCTGTGAGAGACTTCTATAATAATGCAGGCAACATGCTCACCTTT	CAVRDFYNNAGNMLTF	TRAV1-1		TRAJ39	TRA
PBMC-Naive-alpha	439	46	0.0001	TGTGCAGAGAATAGTCCAGGATACAGCACCCTCACCTTT	CAENSPGYSTLTF	TRAV13-2		TRAJ11	TRA
PBMC-Naive-alpha	440	46	0.0001	TGTGCTCTGAGAGGGAAAAGGTCCCCCCTCAACGACTACAAGCTCAGCTTT	CALRGKRSPLNDYKLSF	TRAV9-2		TRAJ20	TRA
PBMC-Naive-alpha	441	46	0.0001	TGTGCTGTGGAGGACCTTTCAGGATACAGCACCCTCACCTTT	CAVEDLSGYSTLTF	TRAV2		TRAJ11	TRA
PBMC-Naive-alpha	442	46	0.0001	TGTGCTGTGCAGCGTTCTGGTTCTGCAAGGCAACTGACCTTT	CAVQRSGSARQLTF	TRAV20		TRAJ22	TRA
PBMC-Naive-alpha	443	46	0.0001	TGTGCTGTGTACGGAGAAGGTGGTGCTACAAACAAGCTCATCTTT	CAVYGEGGATNKLIF	TRAV2		TRAJ32	TRA
PBMC-Naive-alpha	444	46	0.0001	TGTGCAGCTGGAGGAGGTGCTGACGGACTCACCTTT	CAAGGGADGLTF	TRAV29/DV5		TRAJ45	TRA
PBMC-Naive-alpha	445	46	0.0001	TGTGCTGTGAGGGTACTAAGAGGCTCAACCCTGGGGAGGCTATACTTT	CAVRVLRGSTLGRLYF	TRAV36/DV7		TRAJ18	TRA
PBMC-Naive-alpha	446	46	0.0001	TGTGCTGTCGTAAATACTGGAGGCTTCAAAACTATCTTT	CAVVNTGGFKTIF	TRAV22		TRAJ9	TRA
PBMC-Naive-alpha	447	46	0.0001	TGTGCTTATTACTTTACCGGTAACCAGTTCTATTTT	CAYYFTGNQFYF	TRAV38-2/DV8		TRAJ49	TRA
PBMC-Naive-alpha	448	46	0.0001	TGTGCTGTCGGCAAGAACGACAAGGTGATATTT	CAVGKNDKVIF	TRAV36/DV7		TRAJ50	TRA
PBMC-Naive-alpha	449	46	0.0001	TGTGCTCTGCCCGGCACGATTTATAACCAGGGAGGAAAGCTTATCTTC	CALPGTIYNQGGKLIF	TRAV9-2		TRAJ23	TRA
PBMC-Naive-alpha	450	46	0.0001	TGTGCTCTTCAGGGAGCCCAGAAGCTGGTATTT	CALQGAQKLVF	TRAV9-2		TRAJ54	TRA
PBMC-Naive-alpha	451	46	0.0001	TGTGCTGTGACTCGGGGTGGTGCTACAAACAAGCTCATCTTT	CAVTRGGATNKLIF	TRAV21		TRAJ32	TRA
PBMC-Naive-alpha	452	46	0.0001	TGTGCTGTGAACAATGCTGGCAACAACCGTAAGCTGATTTGG	CAVNNAGNNRKLIW	TRAV21		TRAJ38	TRA
PBMC-Naive-alpha	453	46	0.0001	TGCCTTGATGGCCAGAAGCTGCTCTTT	CLDGQKLLF	TRAV4		TRAJ16	TRA
PBMC-Naive-alpha	454	46	0.0001	TGTGCCCCCAGGGGAGCTGACTATGGTCAGAATTTTGTCTTT	CAPRGADYGQNFVF	TRAV38-1		TRAJ26	TRA
PBMC-Naive-alpha	455	46	0.0001	TGTGTGGTGAGCGAGAACTATGGTCAGAATTTTGTCTTT	CVVSENYGQNFVF	TRAV10		TRAJ26	TRA
PBMC-Naive-alpha	456	46	0.0001	TGTGCTGTTCAGGGCGGATCTGAAAAGCTGGTCTTT	CAVQGGSEKLVF	TRAV21		TRAJ57	TRA
PBMC-Naive-alpha	457	46	0.0001	TGTGCTGTGGAGGTAGCTACTGGAGGCTTCAAAACTATCTTT	CAVEVATGGFKTIF	TRAV2		TRAJ9	TRA
PBMC-Naive-alpha	458	46	0.0001	TGTGCTGTGAAGGAAAGGGGCTTTCAGAAACTTGTATTT	CAVKERGFQKLVF	TRAV21		TRAJ8	TRA
PBMC-Naive-alpha	459	46	0.0001	TGTGCAGAGGAAAATGCCAGACTCATGTTT	CAEENARLMF	TRAV13-2		TRAJ31	TRA
PBMC-Naive-alpha	460	46	0.0001	TGTGCTGTGACCCCGCGTTATGGTGGTGCTACAAACAAGCTCATCTTT	CAVTPRYGGATNKLIF	TRAV21		TRAJ32	TRA
PBMC-Naive-alpha	461	45	0.0001	TGTGCTGTGGGGGATTCAGGAAACACACCTCTTGTCTTT	CAVGDSGNTPLVF	TRAV2		TRAJ29	TRA
PBMC-Naive-alpha	462	45	0.0001	TGTGCTGTCCGCACGGGAGGAGGAAACAAACTCACCTTT	CAVRTGGGNKLTF	TRAV2		TRAJ10	TRA
PBMC-Naive-alpha	463	45	0.0001	TGTGCTGTCAAAGGATCGGGTGCTGGTGGTACTAGCTATGGAAAGCTGACATTT	CAVKGSGAGGTSYGKLTF	TRAV21		TRAJ52	TRA
PBMC-Naive-alpha	464	45	0.0001	TGTGCTGTGCCAACTGACAGCTGGGGGAAATTGCAGTTT	CAVPTDSWGKLQF	TRAV21		TRAJ24	TRA
PBMC-Naive-alpha	465	45	0.0001	TGTGCTCTGAGATTCAGGAACCAGGCAGGAACTGCTCTGATCTTT	CALRFRNQAGTALIF	TRAV9-2		TRAJ15	TRA
PBMC-Naive-alpha	466	45	0.0001	TGTGCTGTGGGATCAGGAGGAAGCTACATACCTACATTT	CAVGSGGSYIPTF	TRAV21		TRAJ6	TRA
PBMC-Naive-alpha	467	45	0.0001	TGTGCTGTCTCCACCGGTAACCAGTTCTATTTT	CAVSTGNQFYF	TRAV21		TRAJ49	TRA
PBMC-Naive-alpha	468	45	0.0001	TCATCATCCGGGGTGGATAGCAGCTATAAATTGATCTTC	SSSGVDSSYKLIF	TRAV21		TRAJ12	TRA
PBMC-Naive-alpha	469	45	0.0001	TGTGCTTATAGGGGGAATAATGCAGGCAACATGCTCACCTTT	CAYRGNNAGNMLTF	TRAV38-2/DV8		TRAJ39	TRA
PBMC-Naive-alpha	470	45	0.0001	TGTGCCCTGAACAGAGATGACAAGATCATCTTT	CALNRDDKIIF	TRAV24		TRAJ30	TRA
PBMC-Naive-alpha	471	45	0.0001	TGTGCTGTGGCTGCATCAGGAGGAAGCTACATACCTACATTT	CAVAASGGSYIPTF	TRAV1-2		TRAJ6	TRA
PBMC-Naive-alpha	472	45	0.0001	TGTGCTGTGAGGCCGGAGGATAGCAGCTATAAATTGATCTTC	CAVRPEDSSYKLIF	TRAV21		TRAJ12	TRA
PBMC-Naive-alpha	473	45	0.0001	TGTGCCCCGAATAGTGGAGGTAGCAACTATAAACTGACATTT	CAPNSGGSNYKLTF	TRAV36/DV7		TRAJ53	TRA
PBMC-Naive-alpha	474	45	0.0001	TGTGCTGTCCTAAACCAGGCAGGAACTGCTCTGATCTTT	CAVLNQAGTALIF	TRAV2		TRAJ15	TRA
PBMC-Naive-alpha	475	45	0.0001	TGTGCTGTCCCCCCGTTTTCAGATGGCCAGAAGCTGCTCTTT	CAVPPFSDGQKLLF	TRAV36/DV7		TRAJ16	TRA
PBMC-Naive-alpha	476	45	0.0001	TGTGCAGCAAGTAAAGTAACCAATGCAGGCAAATCAACCTTT	CAASKVTNAGKSTF	TRAV13-1		TRAJ27	TRA
PBMC-Naive-alpha	477	45	0.0001	TGTGCAGCAAGCGCGTGGGGGGATGATGCAGGCAACATGCTCACCTTT	CAASAWGDDAGNMLTF	TRAV29/DV5		TRAJ39	TRA
PBMC-Naive-alpha	478	45	0.0001	TGCCTCGTGGGTGATTCTAACCAGGGAGGAAAGCTTATCTTC	CLVGDSNQGGKLIF	TRAV4		TRAJ23	TRA
PBMC-Naive-alpha	479	44	0.0001	TGTGCTGTGGAGGATCGAGACAATGCCAGACTCATGTTT	CAVEDRDNARLMF	TRAV2		TRAJ31	TRA
PBMC-Naive-alpha	480	44	0.0001	TGTGCTGCGGGGATGGATAGCAGCTATAAATTGATCTTC	CAAGMDSSYKLIF	TRAV2		TRAJ12	TRA
PBMC-Naive-alpha	481	44	0.0001	TGTGGCACAGAGATCGTGCCTGGAGGCTTCAAAACTATCTTT	CGTEIVPGGFKTIF	TRAV30		TRAJ9	TRA
PBMC-Naive-alpha	482	44	0.0001	TGTGCTTATAACGAGGCTCAGGGCGGATCTGAAAAGCTGGTCTTT	CAYNEAQGGSEKLVF	TRAV38-2/DV8		TRAJ57	TRA
PBMC-Naive-alpha	483	44	0.0001	TGTGCAGCAAGTAGGCCGACGGGCAGGAGAGCACTTACTTTT	CAASRPTGRRALTF	TRAV13-1		TRAJ5	TRA
PBMC-Naive-alpha	484	44	0.0001	TGTGCAGCAAGTAGGTCCGACAAGGTGATATTT	CAASRSDKVIF	TRAV13-1		TRAJ50	TRA
PBMC-Naive-alpha	485	44	0.0001	TGTGCTCTAGAGCCTTCAGATGGCCAGAAGCTGCTCTTT	CALEPSDGQKLLF	TRAV6		TRAJ16	TRA
PBMC-Naive-alpha	486	44	0.0001	TGTGCTGTCTATAACACCGACAAGCTCATCTTT	CAVYNTDKLIF	TRAV21		TRAJ34	TRA
PBMC-Naive-alpha	487	44	0.0001	TGTGCAGATGGGTACAGCAGTGCTTCCAAGATAATCTTT	CADGYSSASKIIF	TRAV13-2		TRAJ3	TRA
PBMC-Naive-alpha	488	44	0.0001	TGTGCAGCAAAGGAGTATTCAGGAGGAGGTGCTGACGGACTCACCTTT	CAAKEYSGGGADGLTF	TRAV29/DV5		TRAJ45	TRA
PBMC-Naive-alpha	489	44	0.0001	TGTGCTCTGAGGAAGAACTATGGTCAGAATTTTGTCTTT	CALRKNYGQNFVF	TRAV9-2		TRAJ26	TRA
PBMC-Naive-alpha	490	44	0.0001	TGTGCTGTGGAGGATCAGAGTTCTGCAAGGCAACTGACCTTT	CAVEDQSSARQLTF	TRAV2		TRAJ22	TRA
PBMC-Naive-alpha	491	44	0.0001	TGTGCTCTTGGGGATAACTATGGTCAGAATTTTGTCTTT	CALGDNYGQNFVF	TRAV38-2/DV8		TRAJ26	TRA
PBMC-Naive-alpha	492	44	0.0001	TGTGCAGCAAGTCCGGGAGGTAGCAACTATAAACTGACATTT	CAASPGGSNYKLTF	TRAV29/DV5		TRAJ53	TRA
PBMC-Naive-alpha	493	44	0.0001	TGTGCTGTGGAGGGCCTGGCTGCAGGCAACAAGCTAACTTTT	CAVEGLAAGNKLTF	TRAV2		TRAJ17	TRA
PBMC-Naive-alpha	494	44	0.0001	TGTGCTTTCATGAAGCAAGATAACAATGCCAGACTCATGTTT	CAFMKQDNNARLMF	TRAV38-1		TRAJ31	TRA
PBMC-Naive-alpha	495	44	0.0001	TGTGCTCTAAGTGGGGACAGCAGTGCTTCCAAGATAATCTTT	CALSGDSSASKIIF	TRAV16		TRAJ3	TRA
PBMC-Naive-alpha	496	44	0.0001	TGTGCAGAGATAGCGCGAGCCAGACTCATGTTT	CAEIARARLMF	TRAV5		TRAJ31	TRA
PBMC-Naive-alpha	497	44	0.0001	TGTGCTGTGGAACGGTCTAACGACTACAAGCTCAGCTTT	CAVERSNDYKLSF	TRAV2		TRAJ20	TRA
PBMC-Naive-alpha	498	44	0.0001	TGTGCTTTCATGAAGCGAGATGACAAGATCATCTTT	CAFMKRDDKIIF	TRAV38-1		TRAJ30	TRA
PBMC-Naive-alpha	499	44	0.0001	TGTGCTCTCTCTGGGGGAAGCTACATACCTACATTT	CALSGGSYIPTF	TRAV9-2		TRAJ6	TRA
PBMC-Naive-alpha	500	44	0.0001	TGTGCTGTGTATGGGGGTGCTACAAACAAGCTCATCTTT	CAVYGGATNKLIF	TRAV21		TRAJ32	TRA
PBMC-Naive-alpha	501	44	0.0001	TGCATCGTCAGAGTCCTCCTAAGGGGTTCTGCAAGGCAACTGACCTTT	CIVRVLLRGSARQLTF	TRAV26-1		TRAJ22	TRA
PBMC-Naive-alpha	502	44	0.0001	TGTGCAGCAAGGGGGCAAGGAGGAACCTACAAATACATCTTT	CAARGQGGTYKYIF	TRAV13-1		TRAJ40	TRA
PBMC-Naive-alpha	503	44	0.0001	TGTGCTACGGTCCGGGGAGGTAGCAACTATAAACTGACATTT	CATVRGGSNYKLTF	TRAV17		TRAJ53	TRA
PBMC-Naive-alpha	504	43	0.0001	TGTGCAGCAAGCTATTACGACAAGGTGATATTT	CAASYYDKVIF	TRAV29/DV5		TRAJ50	TRA
PBMC-Naive-alpha	505	43	0.0001	TGTGCTTATAGGAACAATCAGGGCGGATCTGAAAAGCTGGTCTTT	CAYRNNQGGSEKLVF	TRAV38-2/DV8		TRAJ57	TRA
PBMC-Naive-alpha	506	43	0.0001	TGTGCTCTGAGTAAGCAAGCTGCAGGCAACAAGCTAACTTTT	CALSKQAAGNKLTF	TRAV9-2		TRAJ17	TRA
PBMC-Naive-alpha	507	43	0.0001	TGTGCAGCCCGAGAGGGTGGTGCTACAAACAAGCTCATCTTT	CAAREGGATNKLIF	TRAV23/DV6		TRAJ32	TRA
PBMC-Naive-alpha	508	43	0.0001	TGTGCTGCGCAATCAGGAGGAAGCTACATACCTACATTT	CAAQSGGSYIPTF	TRAV2		TRAJ6	TRA
PBMC-Naive-alpha	509	43	0.0001	TGTGCTCTACTTTCTGGTTCTGCAAGGCAACTGACCTTT	CALLSGSARQLTF	TRAV9-2		TRAJ22	TRA
PBMC-Naive-alpha	510	43	0.0001	TGTGCAGAGACGGGAGGAAGCTACATACCTACATTT	CAETGGSYIPTF	TRAV13-2		TRAJ6	TRA
PBMC-Naive-alpha	511	43	0.0001	TGTGCTCCACCGGGTCAGAATTTTGTCTTT	CAPPGQNFVF	TRAV2		TRAJ26	TRA
PBMC-Naive-alpha	512	43	0.0001	TGTGCTCGGTTGGGCTATGGGAACAACAGACTCGCTTTT	CARLGYGNNRLAF	TRAV9-2		TRAJ7	TRA
PBMC-Naive-alpha	513	43	0.0001	TGTGCTGTCCTGGCCAACCAGGCAGGAACTGCTCTGATCTTT	CAVLANQAGTALIF	TRAV2		TRAJ15	TRA
PBMC-Naive-alpha	514	43	0.0001	TGTGCTGTGGGTTTTGGGGACTACAAGCTCAGCTTT	CAVGFGDYKLSF	TRAV2		TRAJ20	TRA
PBMC-Naive-alpha	515	43	0.0001	TGTGCTGGGCAGTCCCCTAATGCTGGTGGTACTAGCTATGGAAAGCTGACATTT	CAGQSPNAGGTSYGKLTF	TRAV35		TRAJ52	TRA
PBMC-Naive-alpha	516	43	0.0001	TGTGCAGAGATTGCTATGAACAGAGATGACAAGATCATCTTT	CAEIAMNRDDKIIF	TRAV5		TRAJ30	TRA
PBMC-Naive-alpha	517	43	0.0001	TGTGCTCTAGACCTCACCGGAGGCTTCAAAACTATCTTT	CALDLTGGFKTIF	TRAV6		TRAJ9	TRA
PBMC-Naive-alpha	518	43	0.0001	TGTGCAGCAAGCGGTAACCAGTTCTATTTT	CAASGNQFYF	TRAV29/DV5		TRAJ49	TRA
PBMC-Naive-alpha	519	43	0.0001	TGTGCAGCTAAACGGGGCAAAGCTGCAGGCAACAAGCTAACTTTT	CAAKRGKAAGNKLTF	TRAV13-1		TRAJ17	TRA
PBMC-Naive-alpha	520	43	0.0001	TGTGCCGATCAAAATGCTGGTGGTACTAGCTATGGAAAGCTGACATTT	CADQNAGGTSYGKLTF	TRAV35		TRAJ52	TRA
PBMC-Naive-alpha	521	43	0.0001	TGTGCTGTGGGGAACTATGGTCAGAATTTTGTCTTT	CAVGNYGQNFVF	TRAV21		TRAJ26	TRA
PBMC-Naive-alpha	522	43	0.0001	TGTGCTCTGGACACGGGCAGGAGAGCACTTACTTTT	CALDTGRRALTF	TRAV9-2		TRAJ5	TRA
PBMC-Naive-alpha	523	43	0.0001	TGTGCAGGGATCACTGGGGCAAACAACCTCTTCTTT	CAGITGANNLFF	TRAV25		TRAJ36	TRA
PBMC-Naive-alpha	524	42	0.0001	TGTGCTTTCATGAAGCATGTCCCCCCTGGAGCCAATAGTAAGCTGACATTT	CAFMKHVPPGANSKLTF	TRAV38-1		TRAJ56	TRA
PBMC-Naive-alpha	525	42	0.0001	TGTGCAGGGGTGAATTATGGAGGAAGCCAAGGAAATCTCATCTTT	CAGVNYGGSQGNLIF	TRAV5		TRAJ42	TRA
PBMC-Naive-alpha	526	42	0.0001	TGTGCTGGGCAGTTTGAGTATAACCAGGGAGGAAAGCTTATCTTC	CAGQFEYNQGGKLIF	TRAV35		TRAJ23	TRA
PBMC-Naive-alpha	527	42	0.0001	TGTGCTGTGAACACAGGCTTTCAGAAACTTGTATTT	CAVNTGFQKLVF	TRAV21		TRAJ8	TRA
PBMC-Naive-alpha	528	42	0.0001	TGTGCAGGTAATAACACCGACAAGCTCATCTTT	CAGNNTDKLIF	TRAV25		TRAJ34	TRA
PBMC-Naive-alpha	529	42	0.0001	TGTGCTGTGTGTTGGTCAAATTCCGGGTATGCACTCAACTTC	CAVCWSNSGYALNF	TRAV21		TRAJ41	TRA
PBMC-Naive-alpha	530	42	0.0001	TGTGCTGTGGAGGATCTAGGGGGCTACAATAAGCTGATTTTT	CAVEDLGGYNKLIF	TRAV2		TRAJ4	TRA
PBMC-Naive-alpha	531	42	0.0001	TGTGCTGCGGGAACCTACAAATACATCTTT	CAAGTYKYIF	TRAV38-2/DV8		TRAJ40	TRA
PBMC-Naive-alpha	532	42	0.0001	TGTGCTTACCGCCGATATGGAAACAAACTGGTCTTT	CAYRRYGNKLVF	TRAV38-2/DV8		TRAJ47	TRA
PBMC-Naive-alpha	533	42	0.0001	TGTGCTTATAGGAACTCAAATTCCGGGTATGCACTCAACTTC	CAYRNSNSGYALNF	TRAV38-2/DV8		TRAJ41	TRA
PBMC-Naive-alpha	534	42	0.0001	TGTGCAGAGAGTACCTCAGGAACCTACAAATACATCTTT	CAESTSGTYKYIF	TRAV5		TRAJ40	TRA
PBMC-Naive-alpha	535	42	0.0001	TGTGCAGCAAAAACTAATGCAGGCAACATGCTCACCTTT	CAAKTNAGNMLTF	TRAV13-1		TRAJ39	TRA
PBMC-Naive-alpha	536	42	0.0001	TGTGCTCTTCCACCTCAGTCAGGAAACACACCTCTTGTCTTT	CALPPQSGNTPLVF	TRAV9-2		TRAJ29	TRA
PBMC-Naive-alpha	537	42	0.0001	TGCCTCGTGGGCCCCCGGTTTTCAGATGGCCAGAAGCTGCTCTTT	CLVGPRFSDGQKLLF	TRAV4		TRAJ16	TRA
PBMC-Naive-alpha	538	42	0.0001	TGTGCTTTCCTCGGTCAGAATTTTGTCTTT	CAFLGQNFVF	TRAV38-1		TRAJ26	TRA
PBMC-Naive-alpha	539	42	0.0001	TGTGCTTTTTTATACTCTGGGGCTGGGAGTTACCAACTCACTTTC	CAFLYSGAGSYQLTF	TRAV38-2/DV8		TRAJ28	TRA
PBMC-Naive-alpha	540	42	0.0001	TGTGCTCTTGGGGAACTTTCCGGCACTGCCAGTAAACTCACCTTT	CALGELSGTASKLTF	TRAV38-2/DV8		TRAJ44	TRA
PBMC-Naive-alpha	541	42	0.0001	TGTGCTGTGAGCCCCAGAGGCTCAACCCTGGGGAGGCTATACTTT	CAVSPRGSTLGRLYF	TRAV21		TRAJ18	TRA
PBMC-Naive-alpha	542	42	0.0001	TGTGCTTCCATGGAATATGGAAACAAGCTGGTCTTT	CASMEYGNKLVF	TRAV38-1		TRAJ47	TRA
PBMC-Naive-alpha	543	42	0.0001	TGTGCAGAGCACAACCAGGCAGGAACTGCTCTGATCTTT	CAEHNQAGTALIF	TRAV5		TRAJ15	TRA
PBMC-Naive-alpha	544	42	0.0001	TGTGGAGCAGACGGTAGTGGTGGTGCTACAAACAAGCTCATCTTT	CGADGSGGATNKLIF	TRAV34		TRAJ32	TRA
PBMC-Naive-alpha	545	42	0.0001	TGTGCTGGGCAGCATAACAATGCCAGACTCATGTTT	CAGQHNNARLMF	TRAV35		TRAJ31	TRA
PBMC-Naive-alpha	546	42	0.0001	TGTGCTGGGCTCACTGGAGCCAATAGTAAGCTGACATTT	CAGLTGANSKLTF	TRAV35		TRAJ56	TRA
PBMC-Naive-alpha	547	42	0.0001	TGTGCAGCAAGCATCGGGGCTGGGAGTTACCAACTCACTTTC	CAASIGAGSYQLTF	TRAV23/DV6		TRAJ28	TRA
PBMC-Naive-alpha	548	42	0.0001	TGTGCAGCAAGCCTGAATAACAATGCCAGACTCATGTTT	CAASLNNNARLMF	TRAV29/DV5		TRAJ31	TRA
PBMC-Naive-alpha	549	42	0.0001	TGTGCTCTGATAGGCTTTGGGAATGTGCTGCATTGC	CALIGFGNVLHC	TRAV9-2		TRAJ35	TRA
PBMC-Naive-alpha	550	42	0.0001	TGTGCAGAGAATAGCCCTAACACCAATGCAGGCAAATCAACCTTT	CAENSPNTNAGKSTF	TRAV13-2		TRAJ27	TRA
PBMC-Naive-alpha	551	42	0.0001	TGTGCCGTGAACCTTAGTGCTGGTGGTACTAGCTATGGAAAGCTGACATTT	CAVNLSAGGTSYGKLTF	TRAV12-2		TRAJ52	TRA
PBMC-Naive-alpha	552	42	0.0001	TGTGCAGGAGGTTATGGAGGAAGCCAAGGAAATCTCATCTTT	CAGGYGGSQGNLIF	TRAV27		TRAJ42	TRA
PBMC-Naive-alpha	553	41	0.0001	TGTGCTGGGCACCTCCGGGATAACTATGGTCAGAATTTTGTCTTT	CAGHLRDNYGQNFVF	TRAV35		TRAJ26	TRA
PBMC-Naive-alpha	554	41	0.0001	TGTGCTGTGCGCCCCAGAGGAGGCCAGAAGCTGCTCTTT	CAVRPRGGQKLLF	TRAV21		TRAJ16	TRA
PBMC-Naive-alpha	555	41	0.0001	TGTGCAGCAAGTAAAGGTGGTGGCTACAATAAGCTGATTTTT	CAASKGGGYNKLIF	TRAV13-1		TRAJ4	TRA
PBMC-Naive-alpha	556	41	0.0001	TGTGCTGTGAAGGATAACTATGGTCAGAATTTTGTCTTT	CAVKDNYGQNFVF	TRAV1-2		TRAJ26	TRA
PBMC-Naive-alpha	557	41	0.0001	TGTGCTCTCCCAAGGGCCCTGAACAGAGATGACAAGATCATCTTT	CALPRALNRDDKIIF	TRAV6		TRAJ30	TRA
PBMC-Naive-alpha	558	41	0.0001	TGTGCTCCTATAGGCTTTGGGAATGTGCTGCATTGC	CAPIGFGNVLHC	TRAV21		TRAJ35	TRA
PBMC-Naive-alpha	559	41	0.0001	TGTGCTGTCCCCTTTTCAGATGGCCAGAAGCTGCTCTTT	CAVPFSDGQKLLF	TRAV21		TRAJ16	TRA
PBMC-Naive-alpha	560	41	0.0001	TGTGCTGGGCAGCTTGGCAGAGATGACAAGATCATCTTT	CAGQLGRDDKIIF	TRAV35		TRAJ30	TRA
PBMC-Naive-alpha	561	41	0.0001	TGTGCTGTGAGTGTGCGCACCAATGCAGGCAAATCAACCTTT	CAVSVRTNAGKSTF	TRAV2		TRAJ27	TRA
PBMC-Naive-alpha	562	41	0.0001	TGTGCCTGTCAGGGAGCCCAGAAGCTGGTATTT	CACQGAQKLVF	TRAV38-2/DV8		TRAJ54	TRA
PBMC-Naive-alpha	563	41	0.0001	TGTGCTTTCCTCTCTGATAACACCGACAAGCTCATCTTT	CAFLSDNTDKLIF	TRAV38-1		TRAJ34	TRA
PBMC-Naive-alpha	564	41	0.0001	TGTGCTCCTGGTGGCTACAATAAGCTGATTTTT	CAPGGYNKLIF	TRAV9-2		TRAJ4	TRA
PBMC-Naive-alpha	565	41	0.0001	TGTGCTTTCATGAGTTCAGGATACAGCACCCTCACCTTT	CAFMSSGYSTLTF	TRAV38-1		TRAJ11	TRA
PBMC-Naive-alpha	566	41	0.0001	TGTGCAGCAAGCAACTCAAATTCCGGGTATGCACTCAACTTC	CAASNSNSGYALNF	TRAV29/DV5		TRAJ41	TRA
PBMC-Naive-alpha	567	41	0.0001	TGTGCTTTCATGAAGCCTTCCCAGGGTAAGCTGACATTT	CAFMKPSQGKLTF	TRAV38-1		TRAJ56	TRA
PBMC-Naive-alpha	568	41	0.0001	TGTGCTGTGGAGAAAACCAATGCAGGCAAATCAACCTTT	CAVEKTNAGKSTF	TRAV2		TRAJ27	TRA
PBMC-Naive-alpha	569	41	0.0001	TGCCTCGTGGGTGCTACTACCTCAGGAACCTACAAATACATCTTT	CLVGATTSGTYKYIF	TRAV4		TRAJ40	TRA
PBMC-Naive-alpha	570	41	0.0001	TGTGCTGTGCCTTGGATAATTCAGGGAGCCCAGAAGCTGGTATTT	CAVPWIIQGAQKLVF	TRAV21		TRAJ54	TRA
PBMC-Naive-alpha	571	41	0.0001	TGTGCTGGTTATACCGGCACTGCCAGTAAACTCACCTTT	CAGYTGTASKLTF	TRAV35		TRAJ44	TRA
PBMC-Naive-alpha	572	41	0.0001	TGTGCTCTGAGCACGGGCAGGAGAGCACTTACTTTT	CALSTGRRALTF	TRAV9-2		TRAJ5	TRA
PBMC-Naive-alpha	573	41	0.0001	TGTGCAGCACAGACAAATTCCGGGTATGCACTCAACTTC	CAAQTNSGYALNF	TRAV29/DV5		TRAJ41	TRA
PBMC-Naive-alpha	574	41	0.0001	TGTGCTGCCGATGACAGCTGGGGGAAATTGCAGTTT	CAADDSWGKLQF	TRAV2		TRAJ24	TRA
PBMC-Naive-alpha	575	41	0.0001	TGTGCACGGGGGGCTAATGCTGGTGGTACTAGCTATGGAAAGCTGACATTT	CARGANAGGTSYGKLTF	TRAV25		TRAJ52	TRA
PBMC-Naive-alpha	576	41	0.0001	TGTGGCACAGTGCGAGGTCCAAGGAAACTCACCTTT	CGTVRGPRKLTF	TRAV30		TRAJ44	TRA
PBMC-Naive-alpha	577	41	0.0001	TGTGCCTTGAATAACAATGCCAGACTCATGTTT	CALNNNARLMF	TRAV39		TRAJ31	TRA
PBMC-Naive-alpha	578	41	0.0001	TGTGCTGTCAATAACAATGACATGCGCTTT	CAVNNNDMRF	TRAV21		TRAJ43	TRA
PBMC-Naive-alpha	579	41	0.0001	TGTGCAGCAACCTGGATGGATAGCAGCTATAAATTGATCTTC	CAATWMDSSYKLIF	TRAV13-1		TRAJ12	TRA
PBMC-Naive-alpha	580	41	0.0001	TGTGCTTTCATGAGAGGGGCTGGGAGTTACCAACTCACTTTC	CAFMRGAGSYQLTF	TRAV38-1		TRAJ28	TRA
PBMC-Naive-alpha	581	41	0.0001	TGTGCAGGGGTTAACGACTACAAGCTCAGCTTT	CAGVNDYKLSF	TRAV27		TRAJ20	TRA
PBMC-Naive-alpha	582	41	0.0001	TGCGCTGTGAAAAGCAACTATCAGTTAATCTGG	CAVKSNYQLIW	TRAV1-1		TRAJ33	TRA
PBMC-Naive-alpha	583	41	0.0001	TGTGCTCTGAGTAAAAATAACTATGGTCAGAATTTTGTCTTT	CALSKNNYGQNFVF	TRAV9-2		TRAJ26	TRA
PBMC-Naive-alpha	584	41	0.0001	TGTGCTGCCGATAACTATGGTCAGAATTTTGTCTTT	CAADNYGQNFVF	TRAV21		TRAJ26	TRA
PBMC-Naive-alpha	585	40	0.0001	TGTGCTGTGAGCACCGGTAACCAGTTCTATTTT	CAVSTGNQFYF	TRAV21		TRAJ49	TRA
PBMC-Naive-alpha	586	40	0.0001	TGTGCTGGGATGAACACAGGCTTTCAGAAACTTGTATTT	CAGMNTGFQKLVF	TRAV2		TRAJ8	TRA
PBMC-Naive-alpha	587	40	0.0001	TGTGCTGTGCAGGCGGAGACTCTATTGGGAGGAGGAAACAAACTCACCTTT	CAVQAETLLGGGNKLTF	TRAV20		TRAJ10	TRA
PBMC-Naive-alpha	588	40	0.0001	TGTGCTGTGAGGGGGTACAGAGGCTCAACCCTGGGGAGGCTATACTTT	CAVRGYRGSTLGRLYF	TRAV21		TRAJ18	TRA
PBMC-Naive-alpha	589	40	0.0001	TGTGCAGGGCCATCAGGAGGAAGCTACATACCTACATTT	CAGPSGGSYIPTF	TRAV25		TRAJ6	TRA
PBMC-Naive-alpha	590	40	0.0001	TGTGCAGAGACAAGGCAGGCAGGAACTGCTCTGATCTTT	CAETRQAGTALIF	TRAV5		TRAJ15	TRA
PBMC-Naive-alpha	591	40	0.0001	TGTGGCACAGGCACTATTACTTCAGGAAACACACCTCTTGTCTTT	CGTGTITSGNTPLVF	TRAV30		TRAJ29	TRA
PBMC-Naive-alpha	592	40	0.0001	TGTGCTGGGCAGGCCCGATACACCGACAAGCTCATCTTT	CAGQARYTDKLIF	TRAV35		TRAJ34	TRA
PBMC-Naive-alpha	593	40	0.0001	TGTGCTGTTTCTATGGACACGGGCAGGAGAGCACTTACTTTT	CAVSMDTGRRALTF	TRAV21		TRAJ5	TRA
PBMC-Naive-alpha	594	40	0.0001	TGTGCAGGCCCGACTTATAACCAGGGAGGAAAGCTTATCTTC	CAGPTYNQGGKLIF	TRAV27		TRAJ23	TRA
PBMC-Naive-alpha	595	40	0.0001	TGTGCAGCAAGTAGAGTCACGGGAGGAGGAAACAAACTCACCTTT	CAASRVTGGGNKLTF	TRAV13-1		TRAJ10	TRA
PBMC-Naive-alpha	596	40	0.0001	TGTGCTCTGCACCCTTCTGGTGGCTACAATAAGCTGATTTTT	CALHPSGGYNKLIF	TRAV9-2		TRAJ4	TRA
PBMC-Naive-alpha	597	40	0.0001	TGTGCTCTGACCGAAGGAGGGAACAACAGACTCGCTTTT	CALTEGGNNRLAF	TRAV9-2		TRAJ7	TRA
PBMC-Naive-alpha	598	40	0.0001	TGTGCTGTGGATACCGGCACTGCCAGTAAACTCACCTTT	CAVDTGTASKLTF	TRAV36/DV7		TRAJ44	TRA
PBMC-Naive-alpha	599	40	0.0001	TGTGCTGTGGATAACACCGACAAGCTCATCTTT	CAVDNTDKLIF	TRAV21		TRAJ34	TRA
PBMC-Naive-alpha	600	40	0.0001	TGTGCTTTCATGAAGCCCACCTACACCGACAAGCTCATCTTT	CAFMKPTYTDKLIF	TRAV38-1		TRAJ34	TRA
PBMC-Naive-alpha	601	40	0.0001	TGCCTCGTGGATAACACCGACAAGCTCATCTTT	CLVDNTDKLIF	TRAV4		TRAJ34	TRA
PBMC-Naive-alpha	602	40	0.0001	TGCCTCGTGGGTGAGAACAATAACAATGACATGCGCTTT	CLVGENNNNDMRF	TRAV4		TRAJ43	TRA
PBMC-Naive-alpha	603	40	0.0001	TGTGCTGTGGAGGAGAATGGTCAGAATTTTGTCTTT	CAVEENGQNFVF	TRAV2		TRAJ26	TRA
PBMC-Naive-alpha	604	40	0.0001	TGTGCTGTCTCTGGTTCTGCAAGGCAACTGACCTTT	CAVSGSARQLTF	TRAV41		TRAJ22	TRA
PBMC-Naive-alpha	605	40	0.0001	TGTGCTGCCGAAATCGACAATGCCAGACTCATGTTT	CAAEIDNARLMF	TRAV21		TRAJ31	TRA
PBMC-Naive-alpha	606	40	0.0001	TCTGATCGAAATGACATGCGCTTT	SDRNDMRF	TRAV27		TRAJ43	TRA
PBMC-Naive-alpha	607	40	0.0001	TGTGCTCTCGATGCTGGTGGTACTAGCTATGGAAAGCTGACATTT	CALDAGGTSYGKLTF	TRAV9-2		TRAJ52	TRA
PBMC-Naive-alpha	608	40	0.0001	TGTGCAGCAAGGGGGATAGGGACTGACAGCTGGGGGAAATTGCAGTTT	CAARGIGTDSWGKLQF	TRAV13-1		TRAJ24	TRA
PBMC-Naive-alpha	609	40	0.0001	TGTGCTGTGAGAACTGGAGGCTTCAAAACTATCTTT	CAVRTGGFKTIF	TRAV21		TRAJ9	TRA
PBMC-Naive-alpha	610	40	0.0001	TGTGCTGTGGGTACCGGCACTGCCAGTAAACTCACCTTT	CAVGTGTASKLTF	TRAV21		TRAJ44	TRA
PBMC-Naive-alpha	611	40	0.0001	TGTGCTCTAGAAGATGACAAGATCATCTTT	CALEDDKIIF	TRAV6		TRAJ30	TRA
PBMC-Naive-alpha	612	40	0.0001	TGTGCTCTGAGTGAGGGAAACACCGACAAGCTCATCTTT	CALSEGNTDKLIF	TRAV9-2		TRAJ34	TRA
PBMC-Naive-alpha	613	40	0.0001	TGTGCTGTAGGAGGCTTTGGGAATGTGCTGCATTGC	CAVGGFGNVLHC	TRAV2		TRAJ35	TRA
PBMC-Naive-alpha	614	40	0.0001	TGTGCTCTTGAAAATACCGGCACTGCCAGTAAACTCACCTTT	CALENTGTASKLTF	TRAV9-2		TRAJ44	TRA
PBMC-Naive-alpha	615	40	0.0001	TGCCTCGTGTCCCCCGATACAAACAGACTCGCTTTT	CLVSPDTNRLAF	TRAV4		TRAJ7	TRA
PBMC-Naive-alpha	616	40	0.0001	TGTGCTCTGATCGCTGGTGGTACTAGCTATGGAAAGCTGACATTT	CALIAGGTSYGKLTF	TRAV9-2		TRAJ52	TRA
PBMC-Naive-alpha	617	40	0.0001	TGTGCTGCAACTGACAGCTGGGGGAAATTGCAGTTT	CAATDSWGKLQF	TRAV21		TRAJ24	TRA
PBMC-Naive-alpha	618	40	0.0001	TGCACCAATGCAGGCAAATCAACCTTT	CTNAGKSTF	TRAV21		TRAJ27	TRA
PBMC-Naive-alpha	619	40	0.0001	TGTGCTTTCATGAAGGGGGGTACTAGCTATGGAAAGCTGACATTT	CAFMKGGTSYGKLTF	TRAV38-1		TRAJ52	TRA
PBMC-Naive-alpha	620	40	0.0001	TGTGCAGCAAGTCCTACTGGAGCCAATAGTAAGCTGACATTT	CAASPTGANSKLTF	TRAV29/DV5		TRAJ56	TRA
PBMC-Naive-alpha	621	40	0.0001	TGTGCTCTGAGTGCCTCATCAGGAGGAAGCTACATACCTACATTT	CALSASSGGSYIPTF	TRAV9-2		TRAJ6	TRA
PBMC-Naive-alpha	622	40	0.0001	TGTGCTGTGAGCGACTCTAGCAACACAGGCAAACTAATCTTT	CAVSDSSNTGKLIF	TRAV21		TRAJ37	TRA
PBMC-Naive-alpha	623	40	0.0001	TGTGCTGTGGAGGCCTCCTCTGGTTCTGCAAGGCAACTGACCTTT	CAVEASSGSARQLTF	TRAV2		TRAJ22	TRA
PBMC-Naive-alpha	624	40	0.0001	TGTGCTGTATCGATATATGCAGGCAAATCAACCTTT	CAVSIYAGKSTF	TRAV2		TRAJ27	TRA
PBMC-Naive-alpha	625	40	0.0001	TGTGCTGTAACAGCATCAGGAGGAAGCTACATACCTACATTT	CAVTASGGSYIPTF	TRAV1-2		TRAJ6	TRA
PBMC-Naive-alpha	626	40	0.0001	TGTGCTGTGGAGGATTTCGGCACGGGCAGGAGAGCACTTACTTTT	CAVEDFGTGRRALTF	TRAV2		TRAJ5	TRA
PBMC-Naive-alpha	627	40	0.0001	TGTGCAGCAAGTAAGGGAGGAAAGCTTATCTTC	CAASKGGKLIF	TRAV13-1		TRAJ23	TRA
PBMC-Naive-alpha	628	40	0.0001	TGTGCTGGGCTAGGTAACACCGACAAGCTCATCTTT	CAGLGNTDKLIF	TRAV35		TRAJ34	TRA
PBMC-Naive-alpha	629	40	0.0001	TGTGCAGAGAACACGGGCAGGAGAGCACTTACTTTT	CAENTGRRALTF	TRAV13-2		TRAJ5	TRA
PBMC-Naive-alpha	630	40	0.0001	TGTGCTGTGCTGACCAACGACTACAAGCTCAGCTTT	CAVLTNDYKLSF	TRAV1-2		TRAJ20	TRA
PBMC-Naive-alpha	631	40	0.0001	TGTGCTGTGAGAACCAGTGGCTCTAGGTTGACCTTT	CAVRTSGSRLTF	TRAV21		TRAJ58	TRA
PBMC-Naive-alpha	632	40	0.0001	TGTGCAGCATCTTACAGCAGTGCTTCCAAGATAATCTTT	CAASYSSASKIIF	TRAV13-1		TRAJ3	TRA
PBMC-Naive-alpha	633	40	0.0001	TGTGGCACCTCTAAGGGTTCTGCAAGGCAACTGACCTTT	CGTSKGSARQLTF	TRAV30		TRAJ22	TRA
PBMC-Naive-alpha	634	39	0.0001	TGTGCTGTGGAGGTCCCGATCTACAAATACATCTTT	CAVEVPIYKYIF	TRAV2		TRAJ40	TRA
PBMC-Naive-alpha	635	39	0.0001	TGTGCTTTCATGAAGAGGGCTGCTGGTGGTACTAGCTATGGAAAGCTGACATTT	CAFMKRAAGGTSYGKLTF	TRAV38-1		TRAJ52	TRA
PBMC-Naive-alpha	636	39	0.0001	TGTGCTGTGGAGGATAAGGACAGCTGGGGGAAATTGCAGTTT	CAVEDKDSWGKLQF	TRAV2		TRAJ24	TRA
PBMC-Naive-alpha	637	39	0.0001	TGTGCTGTGGCCGGTGCTTCCAAGATAATCTTT	CAVAGASKIIF	TRAV2		TRAJ3	TRA
PBMC-Naive-alpha	638	39	0.0001	TGTGCTGTGTGTATGGGTGGTGCTACAAACAAGCTCATCTTT	CAVCMGGATNKLIF	TRAV21		TRAJ32	TRA
PBMC-Naive-alpha	639	39	0.0001	TGTGCTTTGAGTGGAGGAGGTGCTGACGGACTCACCTTT	CALSGGGADGLTF	TRAV21		TRAJ45	TRA
PBMC-Naive-alpha	640	39	0.0001	TGTGCTGTAGGTGAGGGCACGGGCAGGAGAGCACTTACTTTT	CAVGEGTGRRALTF	TRAV2		TRAJ5	TRA
PBMC-Naive-alpha	641	39	0.0001	TGTGCAGAGAACCAGGGAGGAAAGCTTATCTTC	CAENQGGKLIF	TRAV13-2		TRAJ23	TRA
PBMC-Naive-alpha	642	39	0.0001	TGTGCTACGGGGTACACCGACAAGCTCATCTTT	CATGYTDKLIF	TRAV17		TRAJ34	TRA
PBMC-Naive-alpha	643	39	0.0001	TGTGCTGTCCAGACCAAAGCTGCAGGCAACAAGCTAACTTTT	CAVQTKAAGNKLTF	TRAV2		TRAJ17	TRA
PBMC-Naive-alpha	644	39	0.0001	TGTGGCACAGTTACAACTGACAGCTGGGGGAAATTGCAGTTT	CGTVTTDSWGKLQF	TRAV30		TRAJ24	TRA
PBMC-Naive-alpha	645	39	0.0001	TGTGCTTATAGGAATTATGGAGGAAGCCAAGGAAATCTCATCTTT	CAYRNYGGSQGNLIF	TRAV38-2/DV8		TRAJ42	TRA
PBMC-Naive-alpha	646	39	0.0001	TGCCTCGTGGCCGACGGGATGAACACAGGCTTTCAGAAACTTGTATTT	CLVADGMNTGFQKLVF	TRAV4		TRAJ8	TRA
PBMC-Naive-alpha	647	39	0.0001	TGTGCTCTGAATATGGATAGCAACTATCAGTTAATCTGG	CALNMDSNYQLIW	TRAV9-2		TRAJ33	TRA
PBMC-Naive-alpha	648	39	0.0001	TGCCTCGTGGGTGCAGGGGATAGCAGCTATAAATTGATCTTC	CLVGAGDSSYKLIF	TRAV4		TRAJ12	TRA
PBMC-Naive-alpha	649	39	0.0001	TGTGGCACAGAGTGGGATAGCAGCTATAAATTGATCTTC	CGTEWDSSYKLIF	TRAV30		TRAJ12	TRA
PBMC-Naive-alpha	650	39	0.0001	TGTGCAGTAACTAATAATGCAGGCAACATGCTCACCTTT	CAVTNNAGNMLTF	TRAV13-1		TRAJ39	TRA
PBMC-Naive-alpha	651	39	0.0001	TGTGCTGGGCCTAATGCTGGTGGTACTAGCTATGGAAAGCTGACATTT	CAGPNAGGTSYGKLTF	TRAV35		TRAJ52	TRA
PBMC-Naive-alpha	652	39	0.0001	TGTGCTTTCATGATTTATAACCAGGGAGGAAAGCTTATCTTC	CAFMIYNQGGKLIF	TRAV38-1		TRAJ23	TRA
PBMC-Naive-alpha	653	39	0.0001	TGTGCTTTGTATAACACCAATGCAGGCAAATCAACCTTT	CALYNTNAGKSTF	TRAV38-1		TRAJ27	TRA
PBMC-Naive-alpha	654	39	0.0001	TGTGCTCTTGGGGAACTGAGGGGTGCTACAAACAAGCTCATCTTT	CALGELRGATNKLIF	TRAV38-2/DV8		TRAJ32	TRA
PBMC-Naive-alpha	655	39	0.0001	TGTGCTCTGAGTGATCGGGGTACTGGAGGCTTCAAAACTATCTTT	CALSDRGTGGFKTIF	TRAV9-2		TRAJ9	TRA
PBMC-Naive-alpha	656	39	0.0001	TTGGCTCTGAATGTGCTGCATTGC	LALNVLHC	TRAV13-2		TRAJ35	TRA
PBMC-Naive-alpha	657	39	0.0001	TGTGCTGTGCAGGCGATAGGCTTTGGGAATGTGCTGCATTGC	CAVQAIGFGNVLHC	TRAV20		TRAJ35	TRA
PBMC-Naive-alpha	658	39	0.0001	TGTGCTTACGATACTGGAGGCTTCAAAACTATCTTT	CAYDTGGFKTIF	TRAV38-2/DV8		TRAJ9	TRA
PBMC-Naive-alpha	659	39	0.0001	TGTGCTGTGGAGGTGGACAGAGATGACAAGATCATCTTT	CAVEVDRDDKIIF	TRAV2		TRAJ30	TRA
PBMC-Naive-alpha	660	39	0.0001	TGTGCAGCAAGCGATACCTCAGGAACCTACAAATACATCTTT	CAASDTSGTYKYIF	TRAV13-1		TRAJ40	TRA
PBMC-Naive-alpha	661	39	0.0001	TGTGGCACAGAGGATAACTATGGTCAGAATTTTGTCTTT	CGTEDNYGQNFVF	TRAV30		TRAJ26	TRA
PBMC-Naive-alpha	662	39	0.0001	TGTGCTTTCATGTCTGGAGCCAATAGTAAGCTGACATTT	CAFMSGANSKLTF	TRAV38-1		TRAJ56	TRA
PBMC-Naive-alpha	663	39	0.0001	TGTGCTGTGGAGGATCTCGGCGACTACAAGCTCAGCTTT	CAVEDLGDYKLSF	TRAV2		TRAJ20	TRA
PBMC-Naive-alpha	664	39	0.0001	TGTGTGGTGTCTTACGACTACAAGCTCAGCTTT	CVVSYDYKLSF	TRAV10		TRAJ20	TRA
PBMC-Naive-alpha	665	39	0.0001	TGTGCCTTTCACCATGGTCAGAATTTTGTCTTT	CAFHHGQNFVF	TRAV24		TRAJ26	TRA
PBMC-Naive-alpha	666	39	0.0001	TGTGGAGCAGACATAGCCGGCACTGCCAGTAAACTCACCTTT	CGADIAGTASKLTF	TRAV34		TRAJ44	TRA
PBMC-Naive-alpha	667	39	0.0001	TGTGCTGTAGCTTACAGCAGTGCTTCCAAGATAATCTTT	CAVAYSSASKIIF	TRAV2		TRAJ3	TRA
PBMC-Naive-alpha	668	39	0.0001	TGTGCTGTTGATAACTATGGTCAGAATTTTGTCTTT	CAVDNYGQNFVF	TRAV21		TRAJ26	TRA
PBMC-Naive-alpha	669	39	0.0001	TGTGCGGTTGGCTCTGGCAACACAGGCAAACTAATCTTT	CAVGSGNTGKLIF	TRAV5		TRAJ37	TRA
PBMC-Naive-alpha	670	39	0.0001	TGTGCTGGGTATAACACCGACAAGCTCATCTTT	CAGYNTDKLIF	TRAV35		TRAJ34	TRA
PBMC-Naive-alpha	671	39	0.0001	TGTGCTCTCCTAGTATCATACTCTGGGGCTGGGAGTTACCAACTCACTTTC	CALLVSYSGAGSYQLTF	TRAV9-2		TRAJ28	TRA
PBMC-Naive-alpha	672	39	0.0001	TGTGCTTATTTAGATTTATATAACCAGGGAGGAAAGCTTATCTTC	CAYLDLYNQGGKLIF	TRAV38-2/DV8		TRAJ23	TRA
PBMC-Naive-alpha	673	39	0.0001	TGTGCTTTCATGAGGAATAATGCAGGCAACATGCTCACCTTT	CAFMRNNAGNMLTF	TRAV38-1		TRAJ39	TRA
PBMC-Naive-alpha	674	39	0.0001	TGCCTCGTGGACGACTACAAGCTCAGCTTT	CLVDDYKLSF	TRAV4		TRAJ20	TRA
PBMC-Naive-alpha	675	39	0.0001	TGTGCTGTGAGGCCGGGAGGAAAGCTTATCTTC	CAVRPGGKLIF	TRAV21		TRAJ23	TRA
PBMC-Naive-alpha	676	39	0.0001	TGTGCAGAGAATACTGGAGGCTTCAAAACTATCTTT	CAENTGGFKTIF	TRAV13-2		TRAJ9	TRA
PBMC-Naive-alpha	677	39	0.0001	TGTGCAGGGCCTATGGTGGATAGCAGCTATAAATTGATCTTC	CAGPMVDSSYKLIF	TRAV25		TRAJ12	TRA
PBMC-Naive-alpha	678	39	0.0001	TGTGCTCTGAGCCGAGACACGGGCAGGAGAGCACTTACTTTT	CALSRDTGRRALTF	TRAV9-2		TRAJ5	TRA
PBMC-Naive-alpha	679	39	0.0001	TGTGCTGTGGGACTGTATAGCCAGGGAGGAAAGCTTATCTTC	CAVGLYSQGGKLIF	TRAV21		TRAJ23	TRA
PBMC-Naive-alpha	680	39	0.0001	TGTGCCTTTATAACCGGCACTGCCAGTAAACTCACCTTT	CAFITGTASKLTF	TRAV24		TRAJ44	TRA
PBMC-Naive-alpha	681	39	0.0001	TGTGCTCACCTCGATAACTATGGTCAGAATTTTGTCTTT	CAHLDNYGQNFVF	TRAV2		TRAJ26	TRA
PBMC-Naive-alpha	682	39	0.0001	TGTGCTTTCATCCTTTGGGACAAGGTGATATTT	CAFILWDKVIF	TRAV38-1		TRAJ50	TRA
PBMC-Naive-alpha	683	38	0.0001	TGTGCTGTTGCCGGCACTGCCAGTAAACTCACCTTT	CAVAGTASKLTF	TRAV36/DV7		TRAJ44	TRA
PBMC-Naive-alpha	684	38	0.0001	TGTGCTCCGCTGGATAGCAACTATCAGTTAATCTGG	CAPLDSNYQLIW	TRAV1-2		TRAJ33	TRA
PBMC-Naive-alpha	685	38	0.0001	TGTGCTGTGGATATTCAGGGAGCCCAGAAGCTGGTATTT	CAVDIQGAQKLVF	TRAV21		TRAJ54	TRA
PBMC-Naive-alpha	686	38	0.0001	TGTGGAGCAGACTGGGGATCTTATAACACCGACAAGCTCATCTTT	CGADWGSYNTDKLIF	TRAV34		TRAJ34	TRA
PBMC-Naive-alpha	687	38	0.0001	TGTGCAGAGAGTAGCCCGAACACGGGCAGGAGAGCACTTACTTTT	CAESSPNTGRRALTF	TRAV5		TRAJ5	TRA
PBMC-Naive-alpha	688	38	0.0001	TGTGCTGTGAGAGACACGGATAATGCAGGCAACATGCTCACCTTT	CAVRDTDNAGNMLTF	TRAV3		TRAJ39	TRA
PBMC-Naive-alpha	689	38	0.0001	TGTGCAGAGAATATTTATGGCGACTACAAGCTCAGCTTT	CAENIYGDYKLSF	TRAV13-2		TRAJ20	TRA
PBMC-Naive-alpha	690	38	0.0001	TGTGCTCTGAGGGCTGGTGGTACTAGCTATGGAAAGCTGACATTT	CALRAGGTSYGKLTF	TRAV9-2		TRAJ52	TRA
PBMC-Naive-alpha	691	38	0.0001	TGTGCCCTCCACCAGGCAGGAACTGCTCTGATCTTT	CALHQAGTALIF	TRAV38-1		TRAJ15	TRA
PBMC-Naive-alpha	692	38	0.0001	TACACCGACAATGACATGCGCTTT	YTDNDMRF	TRAV10		TRAJ43	TRA
PBMC-Naive-alpha	693	38	0.0001	TGTGCAATTGGGGTCGGTAGCAGCTATAAATTGATCTTC	CAIGVGSSYKLIF	TRAV12-3		TRAJ12	TRA
PBMC-Naive-alpha	694	38	0.0001	TGTGCTGTGGATAATGCTGGCAACAACCGTAAGCTGATTTGG	CAVDNAGNNRKLIW	TRAV22		TRAJ38	TRA
PBMC-Naive-alpha	695	38	0.0001	TGTGCAGAGACCCATAACAATGCCAGACTCATGTTT	CAETHNNARLMF	TRAV13-2		TRAJ31	TRA
PBMC-Naive-alpha	696	38	0.0001	TGTGCAGCTCAGCTCTTTCAGGGAGCCCAGAAGCTGGTATTT	CAAQLFQGAQKLVF	TRAV27		TRAJ54	TRA
PBMC-Naive-alpha	697	38	0.0001	TGTGTGGTGAACATAAAGTACAGCAGTGCTTCCAAGATAATCTTT	CVVNIKYSSASKIIF	TRAV12-1		TRAJ3	TRA
PBMC-Naive-alpha	698	38	0.0001	TGTGCAGAGGGCCAGAAGCTGCTCTTT	CAEGQKLLF	TRAV29/DV5		TRAJ16	TRA
PBMC-Naive-alpha	699	38	0.0001	TGTGCTGTCGACTACAAGCTCAGCTTT	CAVDYKLSF	TRAV21		TRAJ20	TRA
PBMC-Naive-alpha	700	38	0.0001	TGTGCTGTGCAGGCTAGCAGCTATAAATTGATCTTC	CAVQASSYKLIF	TRAV2		TRAJ12	TRA
PBMC-Naive-alpha	701	38	0.0001	TGTGCAGCAAGCGCGCAGGGCGGATCTGAAAAGCTGGTCTTT	CAASAQGGSEKLVF	TRAV29/DV5		TRAJ57	TRA
PBMC-Naive-alpha	702	38	0.0001	TGTGCCCGAAATACCGGTAACCAGTTCTATTTT	CARNTGNQFYF	TRAV24		TRAJ49	TRA
PBMC-Naive-alpha	703	38	0.0001	TGTGCTCTGAATGCTGGTGGTACTAGCTATGGAAAGCTGACATTT	CALNAGGTSYGKLTF	TRAV9-2		TRAJ52	TRA
PBMC-Naive-alpha	704	38	0.0001	TGTGCTGTGGGAGAGACGGGCAGGAGAGCACTTACTTTT	CAVGETGRRALTF	TRAV2		TRAJ5	TRA
PBMC-Naive-alpha	705	38	0.0001	TGTGCTGTGGCCTCCGGTAGCAGCTATAAATTGATCTTC	CAVASGSSYKLIF	TRAV2		TRAJ12	TRA
PBMC-Naive-alpha	706	38	0.0001	TGTGCTGTGATCGGCACCGGTAACCAGTTCTATTTT	CAVIGTGNQFYF	TRAV21		TRAJ49	TRA
PBMC-Naive-alpha	707	38	0.0001	TGTGCTGTGGAGGGTGGTGCTACAAACAAGCTCATCTTT	CAVEGGATNKLIF	TRAV21		TRAJ32	TRA
PBMC-Naive-alpha	708	38	0.0001	TGTGCTCTTGGGGAACTAAGTGGGAACAACAGACTCGCTTTT	CALGELSGNNRLAF	TRAV38-2/DV8		TRAJ7	TRA
PBMC-Naive-alpha	709	38	0.0001	TGTGTTCTCGACCGGAATAACAATGCCAGACTCATGTTT	CVLDRNNNARLMF	TRAV2		TRAJ31	TRA
PBMC-Naive-alpha	710	38	0.0001	TGTGCAGCCGGACGGCAACTGACCTTT	CAAGRQLTF	TRAV13-1		TRAJ22	TRA
PBMC-Naive-alpha	711	38	0.0001	TGTGCAGCAAGTAACCCTACTGGAGGCTTCAAAACTATCTTT	CAASNPTGGFKTIF	TRAV13-1		TRAJ9	TRA
PBMC-Naive-alpha	712	38	0.0001	TGCATCGTCACCATGTTCTATTTT	CIVTMFYF	TRAV26-1		TRAJ49	TRA
PBMC-Naive-alpha	713	38	0.0001	TGTGCCCAGGGTGCTGGTGGTACTAGCTATGGAAAGCTGACATTT	CAQGAGGTSYGKLTF	TRAV9-2		TRAJ52	TRA
PBMC-Naive-alpha	714	38	0.0001	TGTGCTTATAGGAGATATGGAAACAAGCTGGTCTTT	CAYRRYGNKLVF	TRAV38-2/DV8		TRAJ47	TRA
PBMC-Naive-alpha	715	38	0.0001	TGTGCTTATAGAAGGGTCCAGTTCTATTTT	CAYRRVQFYF	TRAV38-2/DV8		TRAJ49	TRA
PBMC-Naive-alpha	716	38	0.0001	TGTGCTGGGCATGCTGGCAACAACCGTAAGCTGATTTGG	CAGHAGNNRKLIW	TRAV35		TRAJ38	TRA
PBMC-Naive-alpha	717	38	0.0001	TGTGCAGGAGAGAACTATGGTCAGAATTTTGTCTTT	CAGENYGQNFVF	TRAV27		TRAJ26	TRA
PBMC-Naive-alpha	718	38	0.0001	TGTGCTGTGGACGCTTCTGGTTCTGCAAGGCAACTGACCTTT	CAVDASGSARQLTF	TRAV2		TRAJ22	TRA
PBMC-Naive-alpha	719	38	0.0001	TGTGCTCTGAGTCCTCCCGGGGGTGGTGCTACAAACAAGCTCATCTTT	CALSPPGGGATNKLIF	TRAV9-2		TRAJ32	TRA
PBMC-Naive-alpha	720	38	0.0001	TGTGCTCTGGACAGAGGCTCAACCCTGGGGAGGCTATACTTT	CALDRGSTLGRLYF	TRAV9-2		TRAJ18	TRA
PBMC-Naive-alpha	721	38	0.0001	TGTGCTGGGCAGATAAGGAGTGGAGGTAGCAACTATAAACTGACATTT	CAGQIRSGGSNYKLTF	TRAV35		TRAJ53	TRA
PBMC-Naive-alpha	722	38	0.0001	TGTGCTTTCATGGCCAGGCTGCATCAGGGCGGATCTGAAAAGCTGGTCTTT	CAFMARLHQGGSEKLVF	TRAV38-1		TRAJ57	TRA
PBMC-Naive-alpha	723	38	0.0001	TGTGCAGCATGGGCCCGGAACAGAGATGACAAGATCATCTTT	CAAWARNRDDKIIF	TRAV21		TRAJ30	TRA
PBMC-Naive-alpha	724	38	0.0001	TGTGCTCTGAGTGATTTGTCAGGAAACACACCTCTTGTCTTT	CALSDLSGNTPLVF	TRAV9-2		TRAJ29	TRA
PBMC-Naive-alpha	725	38	0.0001	TGTCCTTTGAATGCTGGCAACAACCGTAAGCTGATTTGG	CPLNAGNNRKLIW	TRAV9-2		TRAJ38	TRA
PBMC-Naive-alpha	726	38	0.0001	TGTGTGGTGAGCGCCGGGTACAGCAGTGCTTCCAAGATAATCTTT	CVVSAGYSSASKIIF	TRAV10		TRAJ3	TRA
PBMC-Naive-alpha	727	38	0.0001	TGCATCGTCAGAGTTCCTGCTATAGGCGACAAGCTCATCTTT	CIVRVPAIGDKLIF	TRAV26-1		TRAJ34	TRA
PBMC-Naive-alpha	728	38	0.0001	TGTGCCGCAAATGCTGGTGGTACTAGCTATGGAAAGCTGACATTT	CAANAGGTSYGKLTF	TRAV27		TRAJ52	TRA
PBMC-Naive-alpha	729	38	0.0001	TGTGCAGGGACCGGTAACCAGTTCTATTTT	CAGTGNQFYF	TRAV27		TRAJ49	TRA
PBMC-Naive-alpha	730	38	0.0001	TGTGCAGAGATTAAGACCAATGCAGGCAAATCAACCTTT	CAEIKTNAGKSTF	TRAV13-2		TRAJ27	TRA
PBMC-Naive-alpha	731	38	0.0001	TGTGCCGTGGACGAGGTAGGGGCCAGACTCATGTTT	CAVDEVGARLMF	TRAV39		TRAJ31	TRA
PBMC-Naive-alpha	732	38	0.0001	TGTGCCCCCATGGATAGCAACTATCAGTTAATCTGG	CAPMDSNYQLIW	TRAV1-2		TRAJ33	TRA
PBMC-Naive-alpha	733	38	0.0001	TGTGCTCTAGACCCTGATACTGGAGGCTTCAAAACTATCTTT	CALDPDTGGFKTIF	TRAV6		TRAJ9	TRA
PBMC-Naive-alpha	734	38	0.0001	TGTGCTGGGTACCAAACTGTGGGAGCCAATAGTAAGCTGACATTT	CAGYQTVGANSKLTF	TRAV35		TRAJ56	TRA
PBMC-Naive-alpha	735	38	0.0001	TGTGCTGTGAGAGGGTGGAACACCGACAAGCTCATCTTT	CAVRGWNTDKLIF	TRAV21		TRAJ34	TRA
PBMC-Naive-alpha	736	38	0.0001	TGTGCTGTGGGCTCTGGCAACACAGGCAAACTAATCTTT	CAVGSGNTGKLIF	TRAV21		TRAJ37	TRA
PBMC-Naive-alpha	737	38	0.0001	TGTGCTGGAGGCTATGGGAACAACAGACTCGCTTTT	CAGGYGNNRLAF	TRAV21		TRAJ7	TRA
PBMC-Naive-alpha	738	38	0.0001	TGTGCTGGGCAGCTAACCTCAGGAGGAGGTGCTGACGGACTCACCTTT	CAGQLTSGGGADGLTF	TRAV35		TRAJ45	TRA
PBMC-Naive-alpha	739	38	0.0001	TGTGGCACAGAGATAGGGAATAACAATGCCAGACTCATGTTT	CGTEIGNNNARLMF	TRAV30		TRAJ31	TRA
PBMC-Naive-alpha	740	38	0.0001	TGTGCTCTGAGTTATACTGGAGCCAATAGTAAGCTGACATTT	CALSYTGANSKLTF	TRAV19		TRAJ56	TRA
PBMC-Naive-alpha	741	37	0.0001	TGTGCTCTGAACCAGGCAGGAACTGCTCTGATCTTT	CALNQAGTALIF	TRAV9-2		TRAJ15	TRA
PBMC-Naive-alpha	742	37	0.0001	TGTGCTGCCGAAACCAGTGGCTCTAGGTTGACCTTT	CAAETSGSRLTF	TRAV41		TRAJ58	TRA
PBMC-Naive-alpha	743	37	0.0001	TGTGCAGCATGCTTCTCAGGAACCTACAAATACATCTTT	CAACFSGTYKYIF	TRAV29/DV5		TRAJ40	TRA
PBMC-Naive-alpha	744	37	0.0001	TGTGCTCTGAGGAATAACAATGCCAGACTCATGTTT	CALRNNNARLMF	TRAV9-2		TRAJ31	TRA
PBMC-Naive-alpha	745	37	0.0001	TGTGCTTTCTCTATCCCCCAGGGAAGCCAAGGAAATCTCATCTTT	CAFSIPQGSQGNLIF	TRAV38-1		TRAJ42	TRA
PBMC-Naive-alpha	746	37	0.0001	TGTGCTGTGGAGGGGCACAACTTCAACAAATTTTACTTT	CAVEGHNFNKFYF	TRAV2		TRAJ21	TRA
PBMC-Naive-alpha	747	37	0.0001	TGTGCTTATAGGAGCGCGTTTGGAAATGAGAAATTAACCTTT	CAYRSAFGNEKLTF	TRAV38-2/DV8		TRAJ48	TRA
PBMC-Naive-alpha	748	37	0.0001	TGTGTGGTGACATCAGGAGGAAGCTACATACCTACATTT	CVVTSGGSYIPTF	TRAV10		TRAJ6	TRA
PBMC-Naive-alpha	749	37	0.0001	TGTGCTTTCGGTGCTGGTGGTACTAGCTATGGAAAGCTGACATTT	CAFGAGGTSYGKLTF	TRAV38-1		TRAJ52	TRA
PBMC-Naive-alpha	750	37	0.0001	TGTGCTACGGACGCCAATGCAGGCAAATCAACCTTT	CATDANAGKSTF	TRAV17		TRAJ27	TRA
PBMC-Naive-alpha	751	37	0.0001	TGTGCTGTGGAGCTCTCTAACGACTACAAGCTCAGCTTT	CAVELSNDYKLSF	TRAV22		TRAJ20	TRA
PBMC-Naive-alpha	752	37	0.0001	TGTGCAGCAGTTTTTACCTCAGGAACCTACAAATACATCTTT	CAAVFTSGTYKYIF	TRAV13-1		TRAJ40	TRA
PBMC-Naive-alpha	753	37	0.0001	TGTGCCCATAATGCAGGCAACATGCTCACCTTT	CAHNAGNMLTF	TRAV38-2/DV8		TRAJ39	TRA
PBMC-Naive-alpha	754	37	0.0001	TGTGCTGGGCAGCTGTGGAACTATGGTCAGAATTTTGTCTTT	CAGQLWNYGQNFVF	TRAV35		TRAJ26	TRA
PBMC-Naive-alpha	755	37	0.0001	TGTGTGGTGAGTGGGTATTCAGGAGGAGGTGCTGACGGACTCACCTTT	CVVSGYSGGGADGLTF	TRAV10		TRAJ45	TRA
PBMC-Naive-alpha	756	37	0.0001	TGTGCTGTAAGAGGTAGCAACTATAAACTGACATTT	CAVRGSNYKLTF	TRAV36/DV7		TRAJ53	TRA
PBMC-Naive-alpha	757	37	0.0001	TGTGTGGTGAGCCGTTATAACACCGACAAGCTCATCTTT	CVVSRYNTDKLIF	TRAV10		TRAJ34	TRA
PBMC-Naive-alpha	758	37	0.0001	TGTGCTGTCCGAAAAACCAGTGGCTCTAGGTTGACCTTT	CAVRKTSGSRLTF	TRAV41		TRAJ58	TRA
PBMC-Naive-alpha	759	37	0.0001	TGTGGCACAGAGCTAGGTGCCAGTAAACTCACCTTT	CGTELGASKLTF	TRAV30		TRAJ44	TRA
PBMC-Naive-alpha	760	37	0.0001	TGTGCAGCAATCCAGGGCGGATCTGAAAAGCTGGTCTTT	CAAIQGGSEKLVF	TRAV29/DV5		TRAJ57	TRA
PBMC-Naive-alpha	761	37	0.0001	TGTGCTCTGGGCCCAGGCAGGAGAGCACTTACTTTT	CALGPGRRALTF	TRAV9-2		TRAJ5	TRA
PBMC-Naive-alpha	762	37	0.0001	TGTGCTGTGAGGAGCCAGGCAGGAACTGCTCTGATCTTT	CAVRSQAGTALIF	TRAV21		TRAJ15	TRA
PBMC-Naive-alpha	763	37	0.0001	TGTGCTGTGGAGGATCCAGGTTCTGCAAGGCAACTGACCTTT	CAVEDPGSARQLTF	TRAV2		TRAJ22	TRA
PBMC-Naive-alpha	764	37	0.0001	TGTGCTTATAGGAGCGCAGAAACCAGTGGCTCTAGGTTGACCTTT	CAYRSAETSGSRLTF	TRAV38-2/DV8		TRAJ58	TRA
PBMC-Naive-alpha	765	37	0.0001	TTCTGCCTTTGGGACACCGACAAGCTCATCTTT	FCLWDTDKLIF	TRAV10		TRAJ34	TRA
PBMC-Naive-alpha	766	37	0.0001	TGTGCTCTGAGTTTAATTTATAACCAGGGAGGAAAGCTTATCTTC	CALSLIYNQGGKLIF	TRAV19		TRAJ23	TRA
PBMC-Naive-alpha	767	37	0.0001	TGTGCTGTTATGATCAAAGCTGCAGGCAACAAGCTAACTTTT	CAVMIKAAGNKLTF	TRAV2		TRAJ17	TRA
PBMC-Naive-alpha	768	37	0.0001	TGTGTGGTGAACACGGGAGGAGGAAACAAACTCACCTTT	CVVNTGGGNKLTF	TRAV12-1		TRAJ10	TRA
PBMC-Naive-alpha	769	37	0.0001	TGTGCTTTCATGAAGCAGGATTCCGGGTATGCACTCAACTTC	CAFMKQDSGYALNF	TRAV38-1		TRAJ41	TRA
PBMC-Naive-alpha	770	37	0.0001	TGTGCAGCGCCGTACAGCAGTGCTTCCAAGATAATCTTT	CAAPYSSASKIIF	TRAV13-1		TRAJ3	TRA
PBMC-Naive-alpha	771	37	0.0001	TGTGCTGGGTTCGGCTCTGGCAACACAGGCAAACTAATCTTT	CAGFGSGNTGKLIF	TRAV35		TRAJ37	TRA
PBMC-Naive-alpha	772	37	0.0001	TGTGCTACTCCGATGGATAGCAGCTATAAATTGATCTTC	CATPMDSSYKLIF	TRAV17		TRAJ12	TRA
PBMC-Naive-alpha	773	37	0.0001	TGTGCTGTCGATAACTATGGTCAGAATTTTGTCTTT	CAVDNYGQNFVF	TRAV21		TRAJ26	TRA
PBMC-Naive-alpha	774	37	0.0001	TGTGCTGTGTCAAATTCCGGGTATGCACTCAACTTC	CAVSNSGYALNF	TRAV21		TRAJ41	TRA
PBMC-Naive-alpha	775	37	0.0001	TGTGGAGCAGACCGAAGGGCCACCGGTAACCAGTTCTATTTT	CGADRRATGNQFYF	TRAV34		TRAJ49	TRA
PBMC-Naive-alpha	776	37	0.0001	TGTGCCCCCAGCACCAAAGCTGCAGGCAACAAGCTAACTTTT	CAPSTKAAGNKLTF	TRAV5		TRAJ17	TRA
PBMC-Naive-alpha	777	37	0.0001	TGTGCTCTGGGGAATTCTGGGGGTTACCAGAAAGTTACCTTT	CALGNSGGYQKVTF	TRAV9-2		TRAJ13	TRA
PBMC-Naive-alpha	778	37	0.0001	TGTGGCACGGATTTATATTATGGAGGAAGCCAAGGAAATCTCATCTTT	CGTDLYYGGSQGNLIF	TRAV30		TRAJ42	TRA
PBMC-Naive-alpha	779	37	0.0001	TGTGCTGTTCCCAATACTGGAGGCTTCAAAACTATCTTT	CAVPNTGGFKTIF	TRAV21		TRAJ9	TRA
PBMC-Naive-alpha	780	37	0.0001	TGTGCTGTCGGGGATAATAATGCAGGCAACATGCTCACCTTT	CAVGDNNAGNMLTF	TRAV41		TRAJ39	TRA
PBMC-Naive-alpha	781	37	0.0001	TGTGCTTCAACTGACAGCTGGGGGAAATTGCAGTTT	CASTDSWGKLQF	TRAV36/DV7		TRAJ24	TRA
PBMC-Naive-alpha	782	37	0.0001	TGTGCTTATAGGCTTACCTCAGGAACCTACAAATACATCTTT	CAYRLTSGTYKYIF	TRAV38-2/DV8		TRAJ40	TRA
PBMC-Naive-alpha	783	37	0.0001	TGTGCTGGGCGCTTTGTTGGGGCAAACAACCTCTTCTTT	CAGRFVGANNLFF	TRAV35		TRAJ36	TRA
PBMC-Naive-alpha	784	37	0.0001	TGTGCTCTGAGTGATAACTATGGTCAGAATTTTGTCTTT	CALSDNYGQNFVF	TRAV9-2		TRAJ26	TRA
PBMC-Naive-alpha	785	36	0.0001	TGTGTGGTGAGCGAGTCGAGGAGCAACTATCAGTTAATCTGG	CVVSESRSNYQLIW	TRAV10		TRAJ33	TRA
PBMC-Naive-alpha	786	36	0.0001	TGTGCCGTGGACAGTTATGGTCAGAATTTTGTCTTT	CAVDSYGQNFVF	TRAV39		TRAJ26	TRA
PBMC-Naive-alpha	787	36	0.0001	TGTGCTCTGGACCAGGCAGGAACTGCTCTGATCTTT	CALDQAGTALIF	TRAV9-2		TRAJ15	TRA
PBMC-Naive-alpha	788	36	0.0001	TGTGTGGTGGGGGGAACCTACAAATACATCTTT	CVVGGTYKYIF	TRAV10		TRAJ40	TRA
PBMC-Naive-alpha	789	36	0.0001	TGTGCTTGTACCTCTGGTTCTGCAAGGCAACTGACCTTT	CACTSGSARQLTF	TRAV38-2/DV8		TRAJ22	TRA
PBMC-Naive-alpha	790	36	0.0001	TGTGCAGCTGGGACCGGGTATGCACTCAACTTC	CAAGTGYALNF	TRAV13-1		TRAJ41	TRA
PBMC-Naive-alpha	791	36	0.0001	TGTGCTGGTGGTACTAGCTATGGAAAGCTGACATTT	CAGGTSYGKLTF	TRAV35		TRAJ52	TRA
PBMC-Naive-alpha	792	36	0.0001	TGCCTCGTGGGTGACAGGGGATACAGCACCCTCACCTTT	CLVGDRGYSTLTF	TRAV4		TRAJ11	TRA
PBMC-Naive-alpha	793	36	0.0001	TGTGCTGGTCAAGGGTACAGAGGCTCAACCCTGGGGAGGCTATACTTT	CAGQGYRGSTLGRLYF	TRAV35		TRAJ18	TRA
PBMC-Naive-alpha	794	36	0.0001	TGTGCTGTGCCCTCTGGCAACACAGGCAAACTAATCTTT	CAVPSGNTGKLIF	TRAV21		TRAJ37	TRA
PBMC-Naive-alpha	795	36	0.0001	TGTGCTCCCCATGGTGGTGCTACAAACAAGCTCATCTTT	CAPHGGATNKLIF	TRAV21		TRAJ32	TRA
PBMC-Naive-alpha	796	36	0.0001	TGTGCTTATAGGGGTTATGGAGGAAGCCAAGGAAATCTCATCTTT	CAYRGYGGSQGNLIF	TRAV38-2/DV8		TRAJ42	TRA
PBMC-Naive-alpha	797	36	0.0001	TGTGCTGTGGTAATTTATAACCAGGGAGGAAAGCTTATCTTC	CAVVIYNQGGKLIF	TRAV36/DV7		TRAJ23	TRA
PBMC-Naive-alpha	798	36	0.0001	TGTGCTGCGGTCGGAGGTGGCTACAATAAGCTGATTTTT	CAAVGGGYNKLIF	TRAV2		TRAJ4	TRA
PBMC-Naive-alpha	799	36	0.0001	TGTGCAGCACATCAGGGCGGATCTGAAAAGCTGGTCTTT	CAAHQGGSEKLVF	TRAV29/DV5		TRAJ57	TRA
PBMC-Naive-alpha	800	36	0.0001	TGTGCCGTTAAATCAGGAGGAAGCTACATACCTACATTT	CAVKSGGSYIPTF	TRAV21		TRAJ6	TRA
PBMC-Naive-alpha	801	36	0.0001	TGTGCAGCAAGTATAGAGGACAAGATCATCTTT	CAASIEDKIIF	TRAV13-1		TRAJ30	TRA
PBMC-Naive-alpha	802	36	0.0001	TGTGCTTGCCCAGCCTATGGTCAGAATTTTGTCTTT	CACPAYGQNFVF	TRAV38-2/DV8		TRAJ26	TRA
PBMC-Naive-alpha	803	36	0.0001	TGTGCTGTGAGCCCTTATAACCAGGGAGGAAAGCTTATCTTC	CAVSPYNQGGKLIF	TRAV21		TRAJ23	TRA
PBMC-Naive-alpha	804	36	0.0001	TGTGCAGCAAGCATGGCCCTCTTGGAAGGTTCTGCAAGGCAACTGACCTTT	CAASMALLEGSARQLTF	TRAV29/DV5		TRAJ22	TRA
PBMC-Naive-alpha	805	36	0.0001	TGTGCTCTGAATAACCAGGGAGGAAAGCTTATCTTC	CALNNQGGKLIF	TRAV9-2		TRAJ23	TRA
PBMC-Naive-alpha	806	36	0.0001	TGTGCTTTCAAAGCTAACACCAATGCAGGCAAATCAACCTTT	CAFKANTNAGKSTF	TRAV38-1		TRAJ27	TRA
PBMC-Naive-alpha	807	36	0.0001	TGTGCTCTGAGTGAAGAGTATGGGAACAACAGACTCGCTTTT	CALSEEYGNNRLAF	TRAV19		TRAJ7	TRA
PBMC-Naive-alpha	808	36	0.0001	TGTGCTTATAGGAGCGCGGGCCTTAGGGGGAACAATGACATGCGCTTT	CAYRSAGLRGNNDMRF	TRAV38-2/DV8		TRAJ43	TRA
PBMC-Naive-alpha	809	36	0.0001	TGTGCTGGGTCCTCTGGGGCTGGGAGTTACCAACTCACTTTC	CAGSSGAGSYQLTF	TRAV21		TRAJ28	TRA
PBMC-Naive-alpha	810	36	0.0001	TGTGCTTATAGGAGCTCTGTCTCAGGAACCTACAAATACATCTTT	CAYRSSVSGTYKYIF	TRAV38-2/DV8		TRAJ40	TRA
PBMC-Naive-alpha	811	36	0.0001	TGTGCAGGGTTACAGGGAGCCCAGAAGCTGGTATTT	CAGLQGAQKLVF	TRAV27		TRAJ54	TRA
PBMC-Naive-alpha	812	36	0.0001	TGCCTCGTGGGTGACAGGAACAATGCCAGACTCATGTTT	CLVGDRNNARLMF	TRAV4		TRAJ31	TRA
PBMC-Naive-alpha	813	36	0.0001	TGTGCTCTGAGCGATGCAGGCAACATGCTCACCTTT	CALSDAGNMLTF	TRAV9-2		TRAJ39	TRA
PBMC-Naive-alpha	814	36	0.0001	TGTGCTGGCCGGAGAGATGTGTGGGACAGCAGTGCTTCCAAGATAATCTTT	CAGRRDVWDSSASKIIF	TRAV35		TRAJ3	TRA
PBMC-Naive-alpha	815	36	0.0001	TGTGCTCTAAACACCAATGCAGGCAAATCAACCTTT	CALNTNAGKSTF	TRAV9-2		TRAJ27	TRA
PBMC-Naive-alpha	816	36	0.0001	TGTGCTCTGAGGCCCCTGGATAGCAGCTATAAATTGATCTTC	CALRPLDSSYKLIF	TRAV9-2		TRAJ12	TRA
PBMC-Naive-alpha	817	36	0.0001	TGTGGCACAGACTCAGGAGGAGGTGCTGACGGACTCACCTTT	CGTDSGGGADGLTF	TRAV30		TRAJ45	TRA
PBMC-Naive-alpha	818	36	0.0001	TGTGCAGGAGCTCCTAGTGGAGGTAGCAACTATAAACTGACATTT	CAGAPSGGSNYKLTF	TRAV27		TRAJ53	TRA
PBMC-Naive-alpha	819	36	0.0001	TGTGCTGTGGACGACTACAAGCTCAGCTTT	CAVDDYKLSF	TRAV2		TRAJ20	TRA
PBMC-Naive-alpha	820	36	0.0001	TGCATCGTCAGACCTTCGTCTTCTGGTGGCTACAATAAGCTGATTTTT	CIVRPSSSGGYNKLIF	TRAV26-1		TRAJ4	TRA
PBMC-Naive-alpha	821	36	0.0001	TGTGCTCTGAGTGAGGAAGAAACCAGTGGCTCTAGGTTGACCTTT	CALSEEETSGSRLTF	TRAV19		TRAJ58	TRA
PBMC-Naive-alpha	822	36	0.0001	TGTGCTTTCATGAAGCATGACATGCGCTTT	CAFMKHDMRF	TRAV38-1		TRAJ43	TRA
PBMC-Naive-alpha	823	36	0.0001	TGTGCAGCAAGCGCGATTAATGCTGGCAACAACCGTAAGCTGATTTGG	CAASAINAGNNRKLIW	TRAV29/DV5		TRAJ38	TRA
PBMC-Naive-alpha	824	36	0.0001	TGTGCTGCCTCTTCAGGAAACACACCTCTTGTCTTT	CAASSGNTPLVF	TRAV21		TRAJ29	TRA
PBMC-Naive-alpha	825	36	0.0001	TGTGCTGTGGAGGGTTCTGGGGGTTACCAGAAAGTTACCTTT	CAVEGSGGYQKVTF	TRAV2		TRAJ13	TRA
PBMC-Naive-alpha	826	36	0.0001	TGTGCAGCAAGTAGAAACACAGGCTTTCAGAAACTTGTATTT	CAASRNTGFQKLVF	TRAV13-1		TRAJ8	TRA
PBMC-Naive-alpha	827	36	0.0001	TGTGCTTATACACGTGCAGGCAAATCAACCTTT	CAYTRAGKSTF	TRAV38-2/DV8		TRAJ27	TRA
PBMC-Naive-alpha	828	36	0.0001	TGCATCGTCAGATTCTATAACCAGGGAGGAAAGCTTATCTTC	CIVRFYNQGGKLIF	TRAV26-1		TRAJ23	TRA
PBMC-Naive-alpha	829	36	0.0001	TGTGCCTTTTCAGGCTCTAGCAACACAGGCAAACTAATCTTT	CAFSGSSNTGKLIF	TRAV24		TRAJ37	TRA
PBMC-Naive-alpha	830	36	0.0001	TGTGCTGTTCTTTCTAACGACTACAAGCTCAGCTTT	CAVLSNDYKLSF	TRAV21		TRAJ20	TRA
PBMC-Naive-alpha	831	36	0.0001	TGTGCTGTGAGGCCGGGGTATGGAGGAAGCCAAGGAAATCTCATCTTT	CAVRPGYGGSQGNLIF	TRAV21		TRAJ42	TRA
PBMC-Naive-alpha	832	36	0.0001	TGTGCCGTGGGGAATAATGCAGGCAACATGCTCACCTTT	CAVGNNAGNMLTF	TRAV39		TRAJ39	TRA
PBMC-Naive-alpha	833	36	0.0001	TGCCTCGTGGTTCTCAGTTTTTCAGATGGCCAGAAGCTGCTCTTT	CLVVLSFSDGQKLLF	TRAV4		TRAJ16	TRA
PBMC-Naive-alpha	834	36	0.0001	TGTGCTGTTGTGGCCGACAGAGGCTCAACCCTGGGGAGGCTATACTTT	CAVVADRGSTLGRLYF	TRAV21		TRAJ18	TRA
PBMC-Naive-alpha	835	36	0.0001	TGCCTCGTGGGCGACCCTGCCAGACTCATGTTT	CLVGDPARLMF	TRAV4		TRAJ31	TRA
PBMC-Naive-alpha	836	36	0.0001	TGTGCTTATAGGAGCCCTGGAGGAAGCCAAGGAAATCTCATCTTT	CAYRSPGGSQGNLIF	TRAV38-2/DV8		TRAJ42	TRA
PBMC-Naive-alpha	837	36	0.0001	TGTGCTGTGGACCAGGCAGGAACTGCTCTGATCTTT	CAVDQAGTALIF	TRAV1-2		TRAJ15	TRA
PBMC-Naive-alpha	838	36	0.0001	TGTGCTGATAACCAGGGAGGAAAGCTTATCTTC	CADNQGGKLIF	TRAV21		TRAJ23	TRA
PBMC-Naive-alpha	839	36	0.0001	TGTGCAGGCCGTTATGGTGGTGCTACAAACAAGCTCATCTTT	CAGRYGGATNKLIF	TRAV29/DV5		TRAJ32	TRA
PBMC-Naive-alpha	840	36	0.0001	TGTGCTACGGGCTCCTTCCATCAAACTGGGGCAAACAACCTCTTCTTT	CATGSFHQTGANNLFF	TRAV17		TRAJ36	TRA
PBMC-Naive-alpha	841	36	0.0001	TGCGCTGTGAGGAAGACGGGCAGGAGAGCACTTACTTTT	CAVRKTGRRALTF	TRAV1-1		TRAJ5	TRA
PBMC-Naive-alpha	842	36	0.0001	TGTGCTGGCCGCTCAGGAAACACACCTCTTGTCTTT	CAGRSGNTPLVF	TRAV35		TRAJ29	TRA
PBMC-Naive-alpha	843	36	0.0001	TGTGCTGTGAGAGACATAGACGACTACAAGCTCAGCTTT	CAVRDIDDYKLSF	TRAV3		TRAJ20	TRA
PBMC-Naive-alpha	844	36	0.0001	TGTGCAGCAAGTGGGAGGGGCCCATACAACTTCAACAAATTTTACTTT	CAASGRGPYNFNKFYF	TRAV13-1		TRAJ21	TRA
PBMC-Naive-alpha	845	36	0.0001	TGTGCTGGGAAAGCTGGTGGTACTAGCTATGGAAAGCTGACATTT	CAGKAGGTSYGKLTF	TRAV36/DV7		TRAJ52	TRA
PBMC-Naive-alpha	846	36	0.0001	TGTGCTGTGGATGATAATGCAGGCAACATGCTCACCTTT	CAVDDNAGNMLTF	TRAV2		TRAJ39	TRA
PBMC-Naive-alpha	847	36	0.0001	TGTGCAGATCCACCTGGGTACAGCAGTGCTTCCAAGATAATCTTT	CADPPGYSSASKIIF	TRAV13-2		TRAJ3	TRA
PBMC-Naive-alpha	848	36	0.0001	TGTGCTTCGGTACAAACTGGGGCAAACAACCTCTTCTTT	CASVQTGANNLFF	TRAV38-1		TRAJ36	TRA
PBMC-Naive-alpha	849	36	0.0001	TGTGCTTCATGGAGGAACAATGACATGCGCTTT	CASWRNNDMRF	TRAV22		TRAJ43	TRA
PBMC-Naive-alpha	850	36	0.0001	TGTGCAATGAGCGCGAGGTCAGGAGGAAGCTACATACCTACATTT	CAMSARSGGSYIPTF	TRAV12-3		TRAJ6	TRA
PBMC-Naive-alpha	851	35	0.0001	TGTGCAGCACATTCTAACGACTACAAGCTCAGCTTT	CAAHSNDYKLSF	TRAV13-1		TRAJ20	TRA
PBMC-Naive-alpha	852	35	0.0001	TGTGCAGCAAGCTACAGAGATGACAAGATCATCTTT	CAASYRDDKIIF	TRAV13-1		TRAJ30	TRA
PBMC-Naive-alpha	853	35	0.0001	TGTGCAGAGAATATGGGGCCAAAAGCTGCAGGCAACAAGCTAACTTTT	CAENMGPKAAGNKLTF	TRAV13-2		TRAJ17	TRA
PBMC-Naive-alpha	854	35	0.0001	TGTGCTTATTCTGGGGGTTACCAGAAAGTTACCTTT	CAYSGGYQKVTF	TRAV38-2/DV8		TRAJ13	TRA
PBMC-Naive-alpha	855	35	0.0001	TGGGACGAGCCAGATGGCCAGAAGCTGCTCTTT	WDEPDGQKLLF	TRAV21		TRAJ16	TRA
PBMC-Naive-alpha	856	35	0.0001	TGTGCAGCAAGTAACACCGGTAACCAGTTCTATTTT	CAASNTGNQFYF	TRAV13-1		TRAJ49	TRA
PBMC-Naive-alpha	857	35	0.0001	TGTGTGGTGAGCTCAGGAGGAAGCTACATACCTACATTT	CVVSSGGSYIPTF	TRAV10		TRAJ6	TRA
PBMC-Naive-alpha	858	35	0.0001	TGTGTTGTGGGCGACTACAAGCTCAGCTTT	CVVGDYKLSF	TRAV24		TRAJ20	TRA
PBMC-Naive-alpha	859	35	0.0001	TGTGCTGTGAGGAGGTTTAGGGGAGCCAATAGTAAGCTGACATTT	CAVRRFRGANSKLTF	TRAV21		TRAJ56	TRA
PBMC-Naive-alpha	860	35	0.0001	AAAGGTGGTGCTACAAACAAGCTCATCTTT	KGGATNKLIF	TRAV6		TRAJ32	TRA
PBMC-Naive-alpha	861	35	0.0001	TGCGCTCCTAAAGCTGCAGGCAACAAGCTAACTTTT	CAPKAAGNKLTF	TRAV1-1		TRAJ17	TRA
PBMC-Naive-alpha	862	35	0.0001	TGTGCAGGGCGATGGTATAATGCAGGCAACATGCTCACCTTT	CAGRWYNAGNMLTF	TRAV25		TRAJ39	TRA
PBMC-Naive-alpha	863	35	0.0001	TGTGTGGTGAGCAATGCAGGCAACATGCTCACCTTT	CVVSNAGNMLTF	TRAV10		TRAJ39	TRA
PBMC-Naive-alpha	864	35	0.0001	TGTGGCACAGGAAACCAGGGAGGAAAGCTTATCTTC	CGTGNQGGKLIF	TRAV30		TRAJ23	TRA
PBMC-Naive-alpha	865	35	0.0001	TGTGCAGCAAGCGTACCAGGAACCTACAAATACATCTTT	CAASVPGTYKYIF	TRAV29/DV5		TRAJ40	TRA
PBMC-Naive-alpha	866	35	0.0001	TGTGCTGTCTTTAACACCGACAAGCTCATCTTT	CAVFNTDKLIF	TRAV21		TRAJ34	TRA
PBMC-Naive-alpha	867	35	0.0001	TGTGCTGTGGGGCGAGATGACAAGATCATCTTT	CAVGRDDKIIF	TRAV36/DV7		TRAJ30	TRA
PBMC-Naive-alpha	868	35	0.0001	TGTGTGGTGAGCGCGAGAACCGACAAGCTCATCTTT	CVVSARTDKLIF	TRAV10		TRAJ34	TRA
PBMC-Naive-alpha	869	35	0.0001	TGTGCTCTGACCTCAAATACCGGCACTGCCAGTAAACTCACCTTT	CALTSNTGTASKLTF	TRAV9-2		TRAJ44	TRA
PBMC-Naive-alpha	870	35	0.0001	TGTGCTCTGAGTGACCAGGCAGGAACTGCTCTGATCTTT	CALSDQAGTALIF	TRAV9-2		TRAJ15	TRA
PBMC-Naive-alpha	871	35	0.0001	TGTGCAGAGGCCCCAGGCTTTCAGAAACTTGTATTT	CAEAPGFQKLVF	TRAV13-2		TRAJ8	TRA
PBMC-Naive-alpha	872	35	0.0001	TGTGTGGTGAGCGCGCCTTTAACCGACAAGCTCATCTTT	CVVSAPLTDKLIF	TRAV10		TRAJ34	TRA
PBMC-Naive-alpha	873	35	0.0001	TGTGCAGGAGATTTCACTACTGGAGGCTTCAAAACTATCTTT	CAGDFTTGGFKTIF	TRAV27		TRAJ9	TRA
PBMC-Naive-alpha	874	35	0.0001	TGTGCAGCAATTGATAAAACCTCCTACGACAAGGTGATATTT	CAAIDKTSYDKVIF	TRAV13-1		TRAJ50	TRA
PBMC-Naive-alpha	875	35	0.0001	TGTGCCTGGCGGGCTAACTTTGGAAATGAGAAATTAACCTTT	CAWRANFGNEKLTF	TRAV9-2		TRAJ48	TRA
PBMC-Naive-alpha	876	35	0.0001	TGTGCTCTTTCCTCCCACTCTGGGGCTGGGAGTTACCAACTCACTTTC	CALSSHSGAGSYQLTF	TRAV6		TRAJ28	TRA
PBMC-Naive-alpha	877	35	0.0001	TGTGCAGGGCGCTTTTCTGGTTCTGCAAGGCAACTGACCTTT	CAGRFSGSARQLTF	TRAV25		TRAJ22	TRA
PBMC-Naive-alpha	878	35	0.0001	CCCAAGACTGGAGCCAATAGTAAGCTGACATTT	PKTGANSKLTF	TRAV35		TRAJ56	TRA
PBMC-Naive-alpha	879	35	0.0001	TGTGCTCTGAGTGATACAGACACGGGCAGGAGAGCACTTACTTTT	CALSDTDTGRRALTF	TRAV9-2		TRAJ5	TRA
PBMC-Naive-alpha	880	35	0.0001	TGTGCTCTGACCCTGAACCAGGCAGGAACTGCTCTGATCTTT	CALTLNQAGTALIF	TRAV9-2		TRAJ15	TRA
PBMC-Naive-alpha	881	35	0.0001	TGTGCTTCCTTGAACTCAAATTCCGGGTATGCACTCAACTTC	CASLNSNSGYALNF	TRAV22		TRAJ41	TRA
PBMC-Naive-alpha	882	35	0.0001	TGTGCTGTGAGTCACAGAGGCTCAACCCTGGGGAGGCTATACTTT	CAVSHRGSTLGRLYF	TRAV21		TRAJ18	TRA
PBMC-Naive-alpha	883	35	0.0001	TGTGCTGTGAGTGATCAAGGAGGCAGCAGTGCTTCCAAGATAATCTTT	CAVSDQGGSSASKIIF	TRAV8-6		TRAJ3	TRA
PBMC-Naive-alpha	884	35	0.0001	TGTGGAGCAGACATGGCTAACCAGGGAGGAAAGCTTATCTTC	CGADMANQGGKLIF	TRAV34		TRAJ23	TRA
PBMC-Naive-alpha	885	35	0.0001	TGTGCTCTGAGTAGGAATAATGCAGGCAACATGCTCACCTTT	CALSRNNAGNMLTF	TRAV9-2		TRAJ39	TRA
PBMC-Naive-alpha	886	35	0.0001	TGTGCAGAGAGCGTAGACACGGGCAGGAGAGCACTTACTTTT	CAESVDTGRRALTF	TRAV13-2		TRAJ5	TRA
PBMC-Naive-alpha	887	35	0.0001	TGTGTGGTGAGCGGATACACCGACAAGCTCATCTTT	CVVSGYTDKLIF	TRAV10		TRAJ34	TRA
PBMC-Naive-alpha	888	35	0.0001	TGTGCAGCAAGTAGGTATTCAGGAGGAGGTGCTGACGGACTCACCTTT	CAASRYSGGGADGLTF	TRAV13-1		TRAJ45	TRA
PBMC-Naive-alpha	889	35	0.0001	TGTGCTCTGATTCGTCCCGGTTCTGCAAGGCAACTGACCTTT	CALIRPGSARQLTF	TRAV9-2		TRAJ22	TRA
PBMC-Naive-alpha	890	35	0.0001	TGTGCAGCAAGCTATGGGGCTGGGAGTTACCAACTCACTTTC	CAASYGAGSYQLTF	TRAV23/DV6		TRAJ28	TRA
PBMC-Naive-alpha	891	35	0.0001	TGTGCTGTGACTACCTCAGGAACCTACAAATACATCTTT	CAVTTSGTYKYIF	TRAV21		TRAJ40	TRA
PBMC-Naive-alpha	892	35	0.0001	TGTGCTCTCATGAATTCTGGGGGTTACCAGAAAGTTACCTTT	CALMNSGGYQKVTF	TRAV9-2		TRAJ13	TRA
PBMC-Naive-alpha	893	35	0.0001	TGTGCTCTGAGTGAGAAGGATAGCAGCTATAAATTGATCTTC	CALSEKDSSYKLIF	TRAV9-2		TRAJ12	TRA
PBMC-Naive-alpha	894	35	0.0001	TGTGCTCTGAGACTTGCTAACTTTGGAAATGAGAAATTAACCTTT	CALRLANFGNEKLTF	TRAV9-2		TRAJ48	TRA
PBMC-Naive-alpha	895	35	0.0001	TGTGCTGGGATATTCCAGGGAGCCCAGAAGCTGGTATTT	CAGIFQGAQKLVF	TRAV21		TRAJ54	TRA
PBMC-Naive-alpha	896	35	0.0001	TGTGCTTTAGGAGGAGGTGCTGACGGACTCACCTTT	CALGGGADGLTF	TRAV21		TRAJ45	TRA
PBMC-Naive-alpha	897	35	0.0001	TGTGCAATGAGCGCTTTCGACTTTGGAAATGAGAAATTAACCTTT	CAMSAFDFGNEKLTF	TRAV12-3		TRAJ48	TRA
PBMC-Naive-alpha	898	35	0.0001	TGTGTGGTGAACACGAGCTGGGGGAAATTGCAGTTT	CVVNTSWGKLQF	TRAV12-1		TRAJ24	TRA
PBMC-Naive-alpha	899	35	0.0001	TGTGCTGTACTATTCTATGGAAAGCTGACATTT	CAVLFYGKLTF	TRAV21		TRAJ52	TRA
PBMC-Naive-alpha	900	35	0.0001	TGTGCTGCCGAGGACACAGGCTTTCAGAAACTTGTATTT	CAAEDTGFQKLVF	TRAV13-1		TRAJ8	TRA
PBMC-Naive-alpha	901	35	0.0001	TGTGCTCTTATAGGCTTTGGGAATGTGCTGCATTGC	CALIGFGNVLHC	TRAV9-2		TRAJ35	TRA
PBMC-Naive-alpha	902	35	0.0001	TGTGCTCTGAGTTCCTCTGGGGGTTACCAGAAAGTTACCTTT	CALSSSGGYQKVTF	TRAV9-2		TRAJ13	TRA
PBMC-Naive-alpha	903	35	0.0001	TGTGCAGCAAGCTCCCAAGAAACCAGTGGCTCTAGGTTGACCTTT	CAASSQETSGSRLTF	TRAV29/DV5		TRAJ58	TRA
PBMC-Naive-alpha	904	35	0.0001	TGTGGAGCAGCCTACAAATACATCTTT	CGAAYKYIF	TRAV34		TRAJ40	TRA
PBMC-Naive-alpha	905	35	0.0001	TGTGCTCCGTCGTACAGGTACAGCAGTGCTTCCAAGATAATCTTT	CAPSYRYSSASKIIF	TRAV9-2		TRAJ3	TRA
PBMC-Naive-alpha	906	35	0.0001	TGTGCTCTGAGTGAAGAGTACCAGTTCTATTTT	CALSEEYQFYF	TRAV9-2		TRAJ49	TRA
PBMC-Naive-alpha	907	35	0.0001	TGTGCAGAGAACTATGGTCAGAATTTTGTCTTT	CAENYGQNFVF	TRAV13-2		TRAJ26	TRA
PBMC-Naive-alpha	908	35	0.0001	TGTGCTCTGAGTGATCGTTTGGTTGGCAGCTATAAATTGATCTTC	CALSDRLVGSYKLIF	TRAV9-2		TRAJ12	TRA
PBMC-Naive-alpha	909	35	0.0001	TGTGCTAAGAGCTCTAGCAACACAGGCAAACTAATCTTT	CAKSSSNTGKLIF	TRAV38-1		TRAJ37	TRA
PBMC-Naive-alpha	910	35	0.0001	TGTGCTTACAACTTCAACAAATTTTACTTT	CAYNFNKFYF	TRAV38-2/DV8		TRAJ21	TRA
PBMC-Naive-alpha	911	35	0.0001	TGTGCTGGCTATCCCAGGGGTAGTGGAGGTAGCAACTATAAACTGACATTT	CAGYPRGSGGSNYKLTF	TRAV35		TRAJ53	TRA
PBMC-Naive-alpha	912	35	0.0001	TGCCTCGTGGGCCCACTTAATTCAGGAGGAGGTGCTGACGGACTCACCTTT	CLVGPLNSGGGADGLTF	TRAV4		TRAJ45	TRA
PBMC-Naive-alpha	913	35	0.0001	TGTGCTGTGCAGGCAGGAGCAGGCAACATGCTCACCTTT	CAVQAGAGNMLTF	TRAV20		TRAJ39	TRA
PBMC-Naive-alpha	914	35	0.0001	TGTGGAGCACCCTATTTCGGCTCTAGCAACACAGGCAAACTAATCTTT	CGAPYFGSSNTGKLIF	TRAV34		TRAJ37	TRA
PBMC-Naive-alpha	915	35	0.0001	TGTGCTGTGGAGCGTGGGGGTTACCAGAAAGTTACCTTT	CAVERGGYQKVTF	TRAV2		TRAJ13	TRA
PBMC-Naive-alpha	916	34	0.0001	TGTGCAGGGAGAGGTAGTACCTCAGGAACCTACAAATACATCTTT	CAGRGSTSGTYKYIF	TRAV25		TRAJ40	TRA
PBMC-Naive-alpha	917	34	0.0001	TGTGCTCTAGTCCTAAACCAGGCAGGAACTGCTCTGATCTTT	CALVLNQAGTALIF	TRAV6		TRAJ15	TRA
PBMC-Naive-alpha	918	34	0.0001	TGTGCTGTGGTTAATGCAGGCAACATGCTCACCTTT	CAVVNAGNMLTF	TRAV21		TRAJ39	TRA
PBMC-Naive-alpha	919	34	0.0001	TGTGCTCTGAGTGACTCTAACTTTGGAAATGAGAAATTAACCTTT	CALSDSNFGNEKLTF	TRAV9-2		TRAJ48	TRA
PBMC-Naive-alpha	920	34	0.0001	TGTGGTGTGGGGCCTGGGAGTTACCAACTCACTTTC	CGVGPGSYQLTF	TRAV1-2		TRAJ28	TRA
PBMC-Naive-alpha	921	34	0.0001	TGTGCTGTGTCTACAACCGATGACATGCGCTTT	CAVSTTDDMRF	TRAV21		TRAJ43	TRA
PBMC-Naive-alpha	922	34	0.0001	TGTGGCACAGAAACGGGAGGAGGAAACAAACTCACCTTT	CGTETGGGNKLTF	TRAV30		TRAJ10	TRA
PBMC-Naive-alpha	923	34	0.0001	TGTGCTTGTGGTGCCAGACTCATGTTT	CACGARLMF	TRAV38-2/DV8		TRAJ31	TRA
PBMC-Naive-alpha	924	34	0.0001	TGTGCAGCAAGTAGGGCTGCAGGCAACAAGCTAACTTTT	CAASRAAGNKLTF	TRAV13-1		TRAJ17	TRA
PBMC-Naive-alpha	925	34	0.0001	TGTGCTCTGAGTAACACCGGTAACCAGTTCTATTTT	CALSNTGNQFYF	TRAV9-2		TRAJ49	TRA
PBMC-Naive-alpha	926	34	0.0001	TGTGCTGTGGTAGGACTCACGGGAGGAGGAAACAAACTCACCTTT	CAVVGLTGGGNKLTF	TRAV2		TRAJ10	TRA
PBMC-Naive-alpha	927	34	0.0001	TGTGCTGCCCTACGTTCTAACGACTACAAGCTCAGCTTT	CAALRSNDYKLSF	TRAV2		TRAJ20	TRA
PBMC-Naive-alpha	928	34	0.0001	TGTGCTTTCATGGGGTACAATAACAATGACATGCGCTTT	CAFMGYNNNDMRF	TRAV38-1		TRAJ43	TRA
PBMC-Naive-alpha	929	34	0.0001	TGTGCTGTGGTTAACAATGCCAGACTCATGTTT	CAVVNNARLMF	TRAV2		TRAJ31	TRA
PBMC-Naive-alpha	930	34	0.0001	TGTGCCGGGGGGAGTGGTGCTACAAACAAGCTCATCTTT	CAGGSGATNKLIF	TRAV36/DV7		TRAJ32	TRA
PBMC-Naive-alpha	931	34	0.0001	TGTGCAGCAAGTCTCACGGGAGGAGGAAACAAACTCACCTTT	CAASLTGGGNKLTF	TRAV13-1		TRAJ10	TRA
PBMC-Naive-alpha	932	34	0.0001	TGTGCTGGGCGGAACTCAGGAACCTACAAATACATCTTT	CAGRNSGTYKYIF	TRAV35		TRAJ40	TRA
PBMC-Naive-alpha	933	34	0.0001	TGTGCAGAGAAAACTGGAGGCTTCAAAACTATCTTT	CAEKTGGFKTIF	TRAV13-2		TRAJ9	TRA
PBMC-Naive-alpha	934	34	0.0001	TGTGCCCATAATAATGCAGGCAACATGCTCACCTTT	CAHNNAGNMLTF	TRAV2		TRAJ39	TRA
PBMC-Naive-alpha	935	34	0.0001	TGTGCAGGAGCCGCAGGAACCTACAAATACATCTTT	CAGAAGTYKYIF	TRAV27		TRAJ40	TRA
PBMC-Naive-alpha	936	34	0.0001	TGCGCTGTGATACGAACTGACAGCTGGGGGAAATTGCAGTTT	CAVIRTDSWGKLQF	TRAV1-1		TRAJ24	TRA
PBMC-Naive-alpha	937	34	0.0001	TGTGCTTATAGGAGGAATAACAATGCCAGACTCATGTTT	CAYRRNNNARLMF	TRAV38-2/DV8		TRAJ31	TRA
PBMC-Naive-alpha	938	34	0.0001	TGTGCTGTGCGGGGCAACACCGACAAGCTCATCTTT	CAVRGNTDKLIF	TRAV20		TRAJ34	TRA
PBMC-Naive-alpha	939	34	0.0001	TGTGCTGTCCTCTATATATTAAATACCGGCACTGCCAGTAAACTCACCTTT	CAVLYILNTGTASKLTF	TRAV2		TRAJ44	TRA
PBMC-Naive-alpha	940	34	0.0001	TGTGCCGTGGACAATAACAATGCCAGACTCATGTTT	CAVDNNNARLMF	TRAV39		TRAJ31	TRA
PBMC-Naive-alpha	941	34	0.0001	TGTGCTGTGGAGGTTAACAATGCCAGACTCATGTTT	CAVEVNNARLMF	TRAV2		TRAJ31	TRA
PBMC-Naive-alpha	942	34	0.0001	TGTGCTGTCCCCTTCTACAATAACAATGACATGCGCTTT	CAVPFYNNNDMRF	TRAV21		TRAJ43	TRA
PBMC-Naive-alpha	943	34	0.0001	TGTGCTGTGAAGCCCGGGGACTACAAGCTCAGCTTT	CAVKPGDYKLSF	TRAV21		TRAJ20	TRA
PBMC-Naive-alpha	944	34	0.0001	TGTGCTTCTCCGGATAACTATGGTCAGAATTTTGTCTTT	CASPDNYGQNFVF	TRAV21		TRAJ26	TRA
PBMC-Naive-alpha	945	34	0.0001	TGCCTCGTGGGTGACAAGAACGCGGGCAGGAGAGCACTTACTTTT	CLVGDKNAGRRALTF	TRAV4		TRAJ5	TRA
PBMC-Naive-alpha	946	34	0.0001	TGTGCTGTGCAGGGGAATAACGACTACAAGCTCAGCTTT	CAVQGNNDYKLSF	TRAV20		TRAJ20	TRA
PBMC-Naive-alpha	947	34	0.0001	TGCCTCGTGGGTGACCTAACTGGGAGGGCGGGAGGAGGAAACAAACTCACCTTT	CLVGDLTGRAGGGNKLTF	TRAV4		TRAJ10	TRA
PBMC-Naive-alpha	948	34	0.0001	TGTGCAGCTTTAGTGGTGGACAAGCTGGTCTTT	CAALVVDKLVF	TRAV25		TRAJ47	TRA
PBMC-Naive-alpha	949	34	0.0001	TGTGCTGTGGAGTCGGACTATGGTCAGAATTTTGTCTTT	CAVESDYGQNFVF	TRAV21		TRAJ26	TRA
PBMC-Naive-alpha	950	34	0.0001	TGTGCTCTGATTACCCGGATGGATAGCAGCTATAAATTGATCTTC	CALITRMDSSYKLIF	TRAV9-2		TRAJ12	TRA
PBMC-Naive-alpha	951	34	0.0001	TGTGCTGGGCAGCCTCTGGGTGGCAACAACCGTAAGCTGATTTGG	CAGQPLGGNNRKLIW	TRAV35		TRAJ38	TRA
PBMC-Naive-alpha	952	34	0.0001	TGTGCTTTCAAAAACTATGGTCAGAATTTTGTCTTT	CAFKNYGQNFVF	TRAV38-1		TRAJ26	TRA
PBMC-Naive-alpha	953	34	0.0001	TGTGCTGTGTTTTTTGGCACTGCCAGTAAACTCACCTTT	CAVFFGTASKLTF	TRAV21		TRAJ44	TRA
PBMC-Naive-alpha	954	34	0.0001	TGTGTTGGCTTTGGGAATGTGCTGCATTGC	CVGFGNVLHC	TRAV41		TRAJ35	TRA
PBMC-Naive-alpha	955	34	0.0001	TGTGCTGGGTCCAATGCTGGTGGTACTAGCTATGGAAAGCTGACATTT	CAGSNAGGTSYGKLTF	TRAV35		TRAJ52	TRA
PBMC-Naive-alpha	956	34	0.0001	TGTGCTGTGAGGCGGGGAACCTACAAATACATCTTT	CAVRRGTYKYIF	TRAV21		TRAJ40	TRA
PBMC-Naive-alpha	957	34	0.0001	TGTGCTTATAGGTTAATTCAGGGAGCCCAGAAGCTGGTATTT	CAYRLIQGAQKLVF	TRAV38-2/DV8		TRAJ54	TRA
PBMC-Naive-alpha	958	34	0.0001	TGTGCAATGTTTTCTGGTGGCTACAATAAGCTGATTTTT	CAMFSGGYNKLIF	TRAV5		TRAJ4	TRA
PBMC-Naive-alpha	959	34	0.0001	TGCGCTGCCATGGACACGGGCAGGAGAGCACTTACTTTT	CAAMDTGRRALTF	TRAV1-1		TRAJ5	TRA
PBMC-Naive-alpha	960	34	0.0001	TGTGGCACAGAGATTTCTTATAACACCGACAAGCTCATCTTT	CGTEISYNTDKLIF	TRAV30		TRAJ34	TRA
PBMC-Naive-alpha	961	34	0.0001	TGTGCTGGGCGAGCTGGTGGTACTAGCTATGGAAAGCTGACATTT	CAGRAGGTSYGKLTF	TRAV35		TRAJ52	TRA
PBMC-Naive-alpha	962	34	0.0001	TGTGCAGAGAAAGCGGTGGACACGGGCAGGAGAGCACTTACTTTT	CAEKAVDTGRRALTF	TRAV13-2		TRAJ5	TRA
PBMC-Naive-alpha	963	34	0.0001	TGCATCGTCAGAGTCTTTATAATTCAGGGAGCCCAGAAGCTGGTATTT	CIVRVFIIQGAQKLVF	TRAV26-1		TRAJ54	TRA
PBMC-Naive-alpha	964	34	0.0001	TGTGCTGTGGGAAGGTCTATGGGCTTTCAGAAACTTGTATTT	CAVGRSMGFQKLVF	TRAV2		TRAJ8	TRA
PBMC-Naive-alpha	965	34	0.0001	TGTGCTGGGCTAAATGCTGGCAACAACCGTAAGCTGATTTGG	CAGLNAGNNRKLIW	TRAV22		TRAJ38	TRA
PBMC-Naive-alpha	966	34	0.0001	TGTGTTAGCTCTGGTGGCTACAATAAGCTGATTTTT	CVSSGGYNKLIF	TRAV12-1		TRAJ4	TRA
PBMC-Naive-alpha	967	34	0.0001	TGTGCTGTGGAGGTTGTTATGGGAGGAGGTGCTGACGGACTCACCTTT	CAVEVVMGGGADGLTF	TRAV36/DV7		TRAJ45	TRA
PBMC-Naive-alpha	968	34	0.0001	TGTGCAGCAAGTCCGGGAGCCCAGAAGCTGGTATTT	CAASPGAQKLVF	TRAV13-1		TRAJ54	TRA
PBMC-Naive-alpha	969	34	0.0001	TGTGCTGTGGCAAAAAGTGACAGCTGGGGGAAATTGCAGTTT	CAVAKSDSWGKLQF	TRAV2		TRAJ24	TRA
PBMC-Naive-alpha	970	34	0.0001	TGTGCTGTCAAACCACCAGGAGCCCAGAAGCTGGTATTT	CAVKPPGAQKLVF	TRAV41		TRAJ54	TRA
PBMC-Naive-alpha	971	34	0.0001	TGTGCGGCCCCTCCAGCATCAGGAGGAAGCTACATACCTACATTT	CAAPPASGGSYIPTF	TRAV21		TRAJ6	TRA
PBMC-Naive-alpha	972	34	0.0001	TGTGCTGTCTCTGGTGGGGCAAACAACCTCTTCTTT	CAVSGGANNLFF	TRAV2		TRAJ36	TRA
PBMC-Naive-alpha	973	34	0.0001	TGTGCTGTGGTGGATAGCAACTATCAGTTAATCTGG	CAVVDSNYQLIW	TRAV36/DV7		TRAJ33	TRA
PBMC-Naive-alpha	974	34	0.0001	TGTGTGGTGAACTATAGGGATAGCAGCTATAAATTGATCTTC	CVVNYRDSSYKLIF	TRAV12-1		TRAJ12	TRA
PBMC-Naive-alpha	975	34	0.0001	TGTGCAGCAAGTCGTCTCACGGGAGGAGGAAACAAACTCACCTTT	CAASRLTGGGNKLTF	TRAV13-1		TRAJ10	TRA
PBMC-Naive-alpha	976	34	0.0001	TGCCTCGTGGGGAATAATGCAGGCAACATGCTCACCTTT	CLVGNNAGNMLTF	TRAV4		TRAJ39	TRA
PBMC-Naive-alpha	977	34	0.0001	TGTGCAATGAGCGAAGCTGGGGGTTACCAGAAAGTTACCTTT	CAMSEAGGYQKVTF	TRAV12-3		TRAJ13	TRA
PBMC-Naive-alpha	978	34	0.0001	TGTGCTTTCATGAAGCCGTTTTCTGGAGCCAATAGTAAGCTGACATTT	CAFMKPFSGANSKLTF	TRAV38-1		TRAJ56	TRA
PBMC-Naive-alpha	979	34	0.0001	TGTGCTCCCAGTGGGGACGACTACAAGCTCAGCTTT	CAPSGDDYKLSF	TRAV21		TRAJ20	TRA
PBMC-Naive-alpha	980	34	0.0001	TGTGCAGTTTCCCTCGGTGGTGCTACAAACAAGCTCATCTTT	CAVSLGGATNKLIF	TRAV21		TRAJ32	TRA
PBMC-Naive-alpha	981	34	0.0001	TGTGCTGCCCGTATGGAATATGGAAACAAACTGGTCTTT	CAARMEYGNKLVF	TRAV35		TRAJ47	TRA
PBMC-Naive-alpha	982	34	0.0001	TGTGCTCTGAAGAGGGACTCTGGGGCTGGGAGTTACCAACTCACTTTC	CALKRDSGAGSYQLTF	TRAV9-2		TRAJ28	TRA
PBMC-Naive-alpha	983	34	0.0001	TGCGTCAATACTGGAGCCAATAGTAAGCTGACATTT	CVNTGANSKLTF	TRAV38-1		TRAJ56	TRA
PBMC-Naive-alpha	984	34	0.0001	TGTGCAGCAACCGTATACTCTGGGGCTGGGAGTTACCAACTCACTTTC	CAATVYSGAGSYQLTF	TRAV13-1		TRAJ28	TRA
PBMC-Naive-alpha	985	34	0.0001	TGTGCTCTGTGTAATGCTGGTGGTACTAGCTATGGAAAGCTGACATTT	CALCNAGGTSYGKLTF	TRAV9-2		TRAJ52	TRA
PBMC-Naive-alpha	986	34	0.0001	TGTGCAGAGAATAGTGGAAGCTTTCAGAAACTTGTATTT	CAENSGSFQKLVF	TRAV13-2		TRAJ8	TRA
PBMC-Naive-alpha	987	34	0.0001	TGTGCTGTAGCCATGAATTATGGAGGAAGCCAAGGAAATCTCATCTTT	CAVAMNYGGSQGNLIF	TRAV21		TRAJ42	TRA
PBMC-Naive-alpha	988	34	0.0001	TGTGCAGCAAGCGACTCAGGAACCTACAAATACATCTTT	CAASDSGTYKYIF	TRAV29/DV5		TRAJ40	TRA
PBMC-Naive-alpha	989	34	0.0001	TGTGCTTATAGGAGCGCTAGTGCAGGCAAATCAACCTTT	CAYRSASAGKSTF	TRAV38-2/DV8		TRAJ27	TRA
PBMC-Naive-alpha	990	33	0.0001	TGTGCTGCAAATAACAATGCCAGACTCATGTTT	CAANNNARLMF	TRAV2		TRAJ31	TRA
PBMC-Naive-alpha	991	33	0.0001	TGTGCTGGGCGTCGGAACACCGGTAACCAGTTCTATTTT	CAGRRNTGNQFYF	TRAV35		TRAJ49	TRA
PBMC-Naive-alpha	992	33	0.0001	TGTGCTGGCTATCAAACTGGGGCAAACAACCTCTTCTTT	CAGYQTGANNLFF	TRAV35		TRAJ36	TRA
PBMC-Naive-alpha	993	33	0.0001	TGTGCAGCAAGCAATCCCGGTTCTGCAAGGCAACTGACCTTT	CAASNPGSARQLTF	TRAV29/DV5		TRAJ22	TRA
PBMC-Naive-alpha	994	33	0.0001	TGTGCCGTGGATTCATATGGAAACAAACTGGTCTTT	CAVDSYGNKLVF	TRAV39		TRAJ47	TRA
PBMC-Naive-alpha	995	33	0.0001	TGTGCTCTGAGCCATTCTGGTTCTGCAAGGCAACTGACCTTT	CALSHSGSARQLTF	TRAV9-2		TRAJ22	TRA
PBMC-Naive-alpha	996	33	0.0001	TGTGCTTTCAAAGGCGTATCGGAGGCCAATAGTAAGCTGACATTT	CAFKGVSEANSKLTF	TRAV38-1		TRAJ56	TRA
PBMC-Naive-alpha	997	33	0.0001	TGTGCAGAGAGAGAGAAACTTGTATTT	CAEREKLVF	TRAV5		TRAJ8	TRA
PBMC-Naive-alpha	998	33	0.0001	TGTGCTGTGTGGGATGCAGGCAACATGCTCACCTTT	CAVWDAGNMLTF	TRAV21		TRAJ39	TRA
PBMC-Naive-alpha	999	33	0.0001	TGTGCTGTGGTGAGTAACACCGACAAGCTCATCTTT	CAVVSNTDKLIF	TRAV2		TRAJ34	TRA
PBMC-Naive-alpha	1000	33	0.0001	TGTGCTTCTCGGAATAACAATGCCAGACTCATGTTT	CASRNNNARLMF	TRAV38-1		TRAJ31	TRA
PBMC-Naive-alpha	1001	33	0.0001	TGTGCTGTGCGTACCGGCACTGCCAGTAAACTCACCTTT	CAVRTGTASKLTF	TRAV21		TRAJ44	TRA
PBMC-Naive-alpha	1002	33	0.0001	TGTGCTCTGGCTAATGCTGGTGGTACTAGCTATGGAAAGCTGACATTT	CALANAGGTSYGKLTF	TRAV9-2		TRAJ52	TRA
PBMC-Naive-alpha	1003	33	0.0001	TGTGCTGTGGAGGAAAGGGGCTTTGGGAATGTGCTGCATTGC	CAVEERGFGNVLHC	TRAV2		TRAJ35	TRA
PBMC-Naive-alpha	1004	33	0.0001	TTACTAGGCGGGGATAACTATGGTCAGAATTTTGTCTTT	LLGGDNYGQNFVF	TRAV36/DV7		TRAJ26	TRA
PBMC-Naive-alpha	1005	33	0.0001	TGTGCAGCAAACCAGGCAGGAACTGCTCTGATCTTT	CAANQAGTALIF	TRAV13-1		TRAJ15	TRA
PBMC-Naive-alpha	1006	33	0.0001	TGTGTGGTGAACATGGCATCTAACTTTGGAAATGAGAAATTAACCTTT	CVVNMASNFGNEKLTF	TRAV12-1		TRAJ48	TRA
PBMC-Naive-alpha	1007	33	0.0001	TGTGCTTATAGGAGTGAAAAGGGAGCCCAGAAGCTGGTATTT	CAYRSEKGAQKLVF	TRAV38-2/DV8		TRAJ54	TRA
PBMC-Naive-alpha	1008	33	0.0001	TGTGCAGAGAATATTGATAACTATGGTCAGAATTTTGTCTTT	CAENIDNYGQNFVF	TRAV13-2		TRAJ26	TRA
PBMC-Naive-alpha	1009	33	0.0001	TGTGCTGTGAAGAGCTATGGTCAGAATTTTGTCTTT	CAVKSYGQNFVF	TRAV21		TRAJ26	TRA
PBMC-Naive-alpha	1010	33	0.0001	TGTGCTGTGCAGGTAGACTATGGAGGAAGCCAAGGAAATCTCATCTTT	CAVQVDYGGSQGNLIF	TRAV20		TRAJ42	TRA
PBMC-Naive-alpha	1011	33	0.0001	TGTGCTGCGGGGGGTAACCAGTTCTATTTT	CAAGGNQFYF	TRAV21		TRAJ49	TRA
PBMC-Naive-alpha	1012	33	0.0001	TGTGCTGTGGAGGATGGGAACTTCAACAAATTTTACTTT	CAVEDGNFNKFYF	TRAV2		TRAJ21	TRA
PBMC-Naive-alpha	1013	33	0.0001	TGTGCAGCAAGTCAGTCAGGAGGAAGCTACATACCTACATTT	CAASQSGGSYIPTF	TRAV13-1		TRAJ6	TRA
PBMC-Naive-alpha	1014	33	0.0001	TGTGCAGAGCGCAATGCTGGCAACAACCGTAAGCTGATTTGG	CAERNAGNNRKLIW	TRAV13-2		TRAJ38	TRA
PBMC-Naive-alpha	1015	33	0.0001	TGTGCTGTGGAGGATGGCCCAGGATACAGCACCCTCACCTTT	CAVEDGPGYSTLTF	TRAV2		TRAJ11	TRA
PBMC-Naive-alpha	1016	33	0.0001	TGTGCTGCCCCCGGAGGTAGCAACTATAAACTGACATTT	CAAPGGSNYKLTF	TRAV21		TRAJ53	TRA
PBMC-Naive-alpha	1017	33	0.0001	TGTGCTGTGAGGCCCATTTCTGGTGGCTACAATAAGCTGATTTTT	CAVRPISGGYNKLIF	TRAV21		TRAJ4	TRA
PBMC-Naive-alpha	1018	33	0.0001	TGTGCAGGCCGCGTGACCAATGCAGGCAAATCAACCTTT	CAGRVTNAGKSTF	TRAV25		TRAJ27	TRA
PBMC-Naive-alpha	1019	33	0.0001	TGTGCTGTGAACCCACCTAATGCTGGTGGTACTAGCTATGGAAAGCTGACATTT	CAVNPPNAGGTSYGKLTF	TRAV21		TRAJ52	TRA
PBMC-Naive-alpha	1020	33	0.0001	TGTGCTCTGAGGAAGAACAATGACATGCGCTTT	CALRKNNDMRF	TRAV9-2		TRAJ43	TRA
PBMC-Naive-alpha	1021	33	0.0001	TGTGCAGCAAGTATTGGGGCTGGTGGCTACAATAAGCTGATTTTT	CAASIGAGGYNKLIF	TRAV13-1		TRAJ4	TRA
PBMC-Naive-alpha	1022	33	0.0001	TGTGCTTATTCGCAGGGAGCCCAGAAGCTGGTATTT	CAYSQGAQKLVF	TRAV38-2/DV8		TRAJ54	TRA
PBMC-Naive-alpha	1023	33	0.0001	TGTGCTGTGTCTCGCAATGCAGGCAACATGCTCACCTTT	CAVSRNAGNMLTF	TRAV21		TRAJ39	TRA
PBMC-Naive-alpha	1024	33	0.0001	TGGCAGGCAGGAACTGCTCTGATCTTT	WQAGTALIF	TRAV12-2		TRAJ15	TRA
PBMC-Naive-alpha	1025	33	0.0001	TGTGCTGTGGAGGCTTCAGGATACAGCACCCTCACCTTT	CAVEASGYSTLTF	TRAV2		TRAJ11	TRA
PBMC-Naive-alpha	1026	33	0.0001	TGTGCTGGGCAGGCCCCTCCGGATAGAGATGACAAGATCATCTTT	CAGQAPPDRDDKIIF	TRAV35		TRAJ30	TRA
PBMC-Naive-alpha	1027	33	0.0001	TGTGCTGTTACCGGCACTGCCAGTAAACTCACCTTT	CAVTGTASKLTF	TRAV21		TRAJ44	TRA
PBMC-Naive-alpha	1028	33	0.0001	TGTGCCGTGGTACCCTTTGGGAATGTGCTGCATTGC	CAVVPFGNVLHC	TRAV39		TRAJ35	TRA
PBMC-Naive-alpha	1029	33	0.0001	TGTGCTTTCATGAGGACAGGAAACACACCTCTTGTCTTT	CAFMRTGNTPLVF	TRAV38-1		TRAJ29	TRA
PBMC-Naive-alpha	1030	33	0.0001	TGTGCAGCAAGTGGGGGTGGTACTAGCTATGGAAAGCTGACATTT	CAASGGGTSYGKLTF	TRAV13-1		TRAJ52	TRA
PBMC-Naive-alpha	1031	33	0.0001	TGTGCTGTGGGTGGTACTAGCTATGGAAAGCTGACATTT	CAVGGTSYGKLTF	TRAV21		TRAJ52	TRA
PBMC-Naive-alpha	1032	33	0.0001	TGTGCAGCAAGTCGGAACACAGGCTTTCAGAAACTTGTATTT	CAASRNTGFQKLVF	TRAV13-1		TRAJ8	TRA
PBMC-Naive-alpha	1033	33	0.0001	TGCGCGAATGCTGGTGGTACTAGCTATGGAAAGCTGACATTT	CANAGGTSYGKLTF	TRAV34		TRAJ52	TRA
PBMC-Naive-alpha	1034	33	0.0001	TGTGCTACGGTTGGTAATTCAGGATACAGCACCCTCACCTTT	CATVGNSGYSTLTF	TRAV17		TRAJ11	TRA
PBMC-Naive-alpha	1035	33	0.0001	TGTCTTAGTGGAGGTAGCAACTATAAACTGACATTT	CLSGGSNYKLTF	TRAV13-1		TRAJ53	TRA
PBMC-Naive-alpha	1036	33	0.0001	TGTGCTGGCCTTGTAATGGAATATGGAAACAAACTGGTCTTT	CAGLVMEYGNKLVF	TRAV35		TRAJ47	TRA
PBMC-Naive-alpha	1037	33	0.0001	TGTGCTGTGAGGCCAACGGGAGGAGGAAACAAACTCACCTTT	CAVRPTGGGNKLTF	TRAV21		TRAJ10	TRA
PBMC-Naive-alpha	1038	33	0.0001	TGTGCAGCAACCACATCAGGAGGAAGCTACATACCTACATTT	CAATTSGGSYIPTF	TRAV13-1		TRAJ6	TRA
PBMC-Naive-alpha	1039	33	0.0001	TGTGCAGAGAATCGGGGAAACACACCTCTTGTCTTT	CAENRGNTPLVF	TRAV13-2		TRAJ29	TRA
PBMC-Naive-alpha	1040	33	0.0001	TGCCCCATTTCTGGTTCTGCAAGGCAACTGACCTTT	CPISGSARQLTF	TRAV4		TRAJ22	TRA
PBMC-Naive-alpha	1041	33	0.0001	TGTGCTCGCCGAGGAACCTACAAATACATCTTT	CARRGTYKYIF	TRAV9-2		TRAJ40	TRA
PBMC-Naive-alpha	1042	33	0.0001	TGTGCTGTGAGTCTGTACTATGGGAACAACAGACTCGCTTTT	CAVSLYYGNNRLAF	TRAV8-6		TRAJ7	TRA
PBMC-Naive-alpha	1043	33	0.0001	TGTGCTTATACCCCGAATTCCGGGTATGCACTCAACTTC	CAYTPNSGYALNF	TRAV38-2/DV8		TRAJ41	TRA
PBMC-Naive-alpha	1044	33	0.0001	TGTGCTGTGACCTTTTCTAACGACTACAAGCTCAGCTTT	CAVTFSNDYKLSF	TRAV2		TRAJ20	TRA
PBMC-Naive-alpha	1045	33	0.0001	TGTGGAGCAGACGCAACTGACAGCTGGGGGAAATTGCAGTTT	CGADATDSWGKLQF	TRAV34		TRAJ24	TRA
PBMC-Naive-alpha	1046	33	0.0001	TGTGCTGGGCCGCGAGGAGGTGCTGACGGACTCACCTTT	CAGPRGGADGLTF	TRAV35		TRAJ45	TRA
PBMC-Naive-alpha	1047	33	0.0001	TGTGCTTTCATGGACACTACCTCAGGAAACACACCTCTTGTCTTT	CAFMDTTSGNTPLVF	TRAV38-1		TRAJ29	TRA
PBMC-Naive-alpha	1048	33	0.0001	TGTGCTTATAGGGGCTATGGAGGAAGCCAAGGAAATCTCATCTTT	CAYRGYGGSQGNLIF	TRAV38-2/DV8		TRAJ42	TRA
PBMC-Naive-alpha	1049	33	0.0001	TGTGCTTTCATGAAGCAGCCCGGCACTGCCAGTAAACTCACCTTT	CAFMKQPGTASKLTF	TRAV38-1		TRAJ44	TRA
PBMC-Naive-alpha	1050	33	0.0001	TGTGCAGAGTCCCCCCGG	CAESPR	TRAV13-2		TRAJ50	TRA
PBMC-Naive-alpha	1051	33	0.0001	TGTGCTCTGAAGGAGGATAGCAGCTATAAATTGATCTTC	CALKEDSSYKLIF	TRAV9-2		TRAJ12	TRA
PBMC-Naive-alpha	1052	33	0.0001	TGTGCTTTATCTGGTTCTGCAAGGCAACTGACCTTT	CALSGSARQLTF	TRAV21		TRAJ22	TRA
PBMC-Naive-alpha	1053	33	0.0001	TGTGCAGCAGCGGGAGGAGGAAACAAACTCACCTTT	CAAAGGGNKLTF	TRAV29/DV5		TRAJ10	TRA
PBMC-Naive-alpha	1054	33	0.0001	TGTGCTCTGAGTGCGCCTATAAAGGGTCAGAATTTTGTCTTT	CALSAPIKGQNFVF	TRAV9-2		TRAJ26	TRA
PBMC-Naive-alpha	1055	33	0.0001	TGCAACCAGGGAGGAAAGCTTATCTTC	CNQGGKLIF	TRAV19		TRAJ23	TRA
PBMC-Naive-alpha	1056	33	0.0001	TGTGCTCTGAGTTATAACCAGGGAGGAAAGCTTATCTTC	CALSYNQGGKLIF	TRAV9-2		TRAJ23	TRA
PBMC-Naive-alpha	1057	33	0.0001	TGTGCTCGAGGCAGCTGGGGGAAATTGCAGTTT	CARGSWGKLQF	TRAV2		TRAJ24	TRA
PBMC-Naive-alpha	1058	33	0.0001	TCCCTGCCGAGATTGACCGGTAACCAGTTCTATTTT	SLPRLTGNQFYF	TRAV21		TRAJ49	TRA
PBMC-Naive-alpha	1059	33	0.0001	TGTGCTGTGAGGGGAGGAAAGCTTATCTTC	CAVRGGKLIF	TRAV21		TRAJ23	TRA
PBMC-Naive-alpha	1060	33	0.0001	TGTGCTGTGGGTAACACCAATGCAGGCAAATCAACCTTT	CAVGNTNAGKSTF	TRAV21		TRAJ27	TRA
PBMC-Naive-alpha	1061	33	0.0001	TGTGCTGTGAGAGATACGGACTATCAGTTAATCTGG	CAVRDTDYQLIW	TRAV1-2		TRAJ33	TRA
PBMC-Naive-alpha	1062	33	0.0001	TGTGCTTATAGGAGAAAAAACACCGACAAGCTCATCTTT	CAYRRKNTDKLIF	TRAV38-2/DV8		TRAJ34	TRA
PBMC-Naive-alpha	1063	33	0.0001	TGTGCTCTGAGTCCGGACAATAACAATGACATGCGCTTT	CALSPDNNNDMRF	TRAV9-2		TRAJ43	TRA
PBMC-Naive-alpha	1064	33	0.0001	TGTGCTCTGACTGATGGTGGTACTAGCTATGGAAAGCTGACATTT	CALTDGGTSYGKLTF	TRAV9-2		TRAJ52	TRA
PBMC-Naive-alpha	1065	33	0.0001	TGTGTGGTGAGCGGAGGAGGTGCTGACGGACTCACCTTT	CVVSGGGADGLTF	TRAV10		TRAJ45	TRA
PBMC-Naive-alpha	1066	33	0.0001	TGTGCTGGTTGTTCAGGAAACACACCTCTTGTCTTT	CAGCSGNTPLVF	TRAV25		TRAJ29	TRA
PBMC-Naive-alpha	1067	33	0.0001	TGTGCATCTTGGTACAGCAGTGCTTCCAAGATAATCTTT	CASWYSSASKIIF	TRAV13-1		TRAJ3	TRA
PBMC-Naive-alpha	1068	32	0.0001	TGTGCCGAAGCGAAAGAAACCAGTGGCTCTAGGTTGACCTTT	CAEAKETSGSRLTF	TRAV12-2		TRAJ58	TRA
PBMC-Naive-alpha	1069	32	0.0001	TGCCTCGTGGGTGCCCCCGGCCAATACATCTTT	CLVGAPGQYIF	TRAV4		TRAJ40	TRA
PBMC-Naive-alpha	1070	32	0.0001	TGTGGAGCAGACATAGCTGGGGCTGGGAGTTACCAACTCACTTTC	CGADIAGAGSYQLTF	TRAV34		TRAJ28	TRA
PBMC-Naive-alpha	1071	32	0.0001	TGTGCTCTTCTCTCAGGAACCTACAAATACATCTTT	CALLSGTYKYIF	TRAV9-2		TRAJ40	TRA
PBMC-Naive-alpha	1072	32	0.0001	TGTGCTTATAGGACCAGAAATGCCAGACTCATGTTT	CAYRTRNARLMF	TRAV38-2/DV8		TRAJ31	TRA
PBMC-Naive-alpha	1073	32	0.0001	TGTGCTTTCATCGGCGGATCTGAAAAGCTGGTCTTT	CAFIGGSEKLVF	TRAV38-1		TRAJ57	TRA
PBMC-Naive-alpha	1074	32	0.0001	TGTGTGGTGAGCGCGGTTCAGGGAGCCCAGAAGCTGGTATTT	CVVSAVQGAQKLVF	TRAV10		TRAJ54	TRA
PBMC-Naive-alpha	1075	32	0.0001	TGTGCTTTCATGATGGGAGGAGGAAGCCAAGGAAATCTCATCTTT	CAFMMGGGSQGNLIF	TRAV38-1		TRAJ42	TRA
PBMC-Naive-alpha	1076	32	0.0001	TGTGCTCTGAGCTCGATAGGCTTTGGGAATGTGCTGCATTGC	CALSSIGFGNVLHC	TRAV9-2		TRAJ35	TRA
PBMC-Naive-alpha	1077	32	0.0001	TGTGCTGTCCCACCGACAACTGACAGCTGGGGGAAATTGCAGTTT	CAVPPTTDSWGKLQF	TRAV21		TRAJ24	TRA
PBMC-Naive-alpha	1078	32	0.0001	TGTGCAGAGACGGTCGCCTTACTACTTTCAGATGGCCAGAAGCTGCTCTTT	CAETVALLLSDGQKLLF	TRAV13-2		TRAJ16	TRA
PBMC-Naive-alpha	1079	32	0.0001	TGTGGCACGTCCCTAAATGCAGGCAAATCAACCTTT	CGTSLNAGKSTF	TRAV30		TRAJ27	TRA
PBMC-Naive-alpha	1080	32	0.0001	TGTGCTGTGGCCGCGGTGGACCGTAAGCTGATTTGG	CAVAAVDRKLIW	TRAV21		TRAJ38	TRA
PBMC-Naive-alpha	1081	32	0.0001	TGTGCTGTGGAGTTATCTAACTTTGGAAATGAGAAATTAACCTTT	CAVELSNFGNEKLTF	TRAV22		TRAJ48	TRA
PBMC-Naive-alpha	1082	32	0.0001	TGTGCTCTGAACCCTGACAATGACATGCGCTTT	CALNPDNDMRF	TRAV9-2		TRAJ43	TRA
PBMC-Naive-alpha	1083	32	0.0001	TGTGCTGTGGAGAGGGGCTATAACCAGGGAGGAAAGCTTATCTTC	CAVERGYNQGGKLIF	TRAV2		TRAJ23	TRA
PBMC-Naive-alpha	1084	32	0.0001	TGTGCTGTGGAGGATTGGGCCGGGGCAAACAACCTCTTCTTT	CAVEDWAGANNLFF	TRAV2		TRAJ36	TRA
PBMC-Naive-alpha	1085	32	0.0001	TGTGTGGTGACCTTCGGGGGTTACCAGAAAGTTACCTTT	CVVTFGGYQKVTF	TRAV10		TRAJ13	TRA
PBMC-Naive-alpha	1086	32	0.0001	TGTGCTGTGAACCAAAATAGTAAGCTGACATTT	CAVNQNSKLTF	TRAV22		TRAJ56	TRA
PBMC-Naive-alpha	1087	32	0.0001	TGTGCTGTGGAGGATCTCAGGCCCAACACCGACAAGCTCATCTTT	CAVEDLRPNTDKLIF	TRAV2		TRAJ34	TRA
PBMC-Naive-alpha	1088	32	0.0001	TGTGCTCCCCTCCCAAATTCCGGGTATGCACTCAACTTC	CAPLPNSGYALNF	TRAV1-2		TRAJ41	TRA
PBMC-Naive-alpha	1089	32	0.0001	TGTGCTGTGGAGGGTAACCAGGGAGGAAAGCTTATCTTC	CAVEGNQGGKLIF	TRAV21		TRAJ23	TRA
PBMC-Naive-alpha	1090	32	0.0001	TGTGCTGTGGAGGTCAACCAGGCAGGAACTGCTCTGATCTTT	CAVEVNQAGTALIF	TRAV2		TRAJ15	TRA
PBMC-Naive-alpha	1091	32	0.0001	TGTGCTTATAGGGGCGCGGAAACCAGTGGCTCTAGGTTGACCTTT	CAYRGAETSGSRLTF	TRAV38-2/DV8		TRAJ58	TRA
PBMC-Naive-alpha	1092	32	0.0001	TGTGCTGGGAGGGAAACTGACAGCTGGGGGAAATTGCAGTTT	CAGRETDSWGKLQF	TRAV21		TRAJ24	TRA
PBMC-Naive-alpha	1093	32	0.0001	TGTGCTCTGAGTGATCGAGGCTTTGGAAATGAGAAATTAACCTTT	CALSDRGFGNEKLTF	TRAV9-2		TRAJ48	TRA
PBMC-Naive-alpha	1094	32	0.0001	TGTGCTTTCAACACCGACAAGCTCATCTTT	CAFNTDKLIF	TRAV38-1		TRAJ34	TRA
PBMC-Naive-alpha	1095	32	0.0001	TGTGCCGTGGACTTAGTGGGAGCCAGACTCATGTTT	CAVDLVGARLMF	TRAV39		TRAJ31	TRA
PBMC-Naive-alpha	1096	32	0.0001	TGTGCTTATAGGAGGCATAACAATGCCAGACTCATGTTT	CAYRRHNNARLMF	TRAV38-2/DV8		TRAJ31	TRA
PBMC-Naive-alpha	1097	32	0.0001	TGTGCAGAGACCGGCGGAAAGCTTATCTTC	CAETGGKLIF	TRAV13-2		TRAJ23	TRA
PBMC-Naive-alpha	1098	32	0.0001	TGTGCTGTCAGCGACACCGACAAGCTCATCTTT	CAVSDTDKLIF	TRAV41		TRAJ34	TRA
PBMC-Naive-alpha	1099	32	0.0001	TGTGCTTTCATGAAGGAGGCAGGCAAATCAACCTTT	CAFMKEAGKSTF	TRAV38-1		TRAJ27	TRA
PBMC-Naive-alpha	1100	32	0.0001	TGTGTGGTGAGCGCGGGAGGTGCTACAAACAAGCTCATCTTT	CVVSAGGATNKLIF	TRAV10		TRAJ32	TRA
PBMC-Naive-alpha	1101	32	0.0001	TGTGCTGTGGAGGATGCCAGACTCATGTTT	CAVEDARLMF	TRAV22		TRAJ31	TRA
PBMC-Naive-alpha	1102	32	0.0001	TGTGGCACACGCCGGGGAGCCCAGAAGCTGGTATTT	CGTRRGAQKLVF	TRAV30		TRAJ54	TRA
PBMC-Naive-alpha	1103	32	0.0001	TGTGCTGGGGCTCTAGCTGCAGGCAACAAGCTAACTTTT	CAGALAAGNKLTF	TRAV21		TRAJ17	TRA
PBMC-Naive-alpha	1104	32	0.0001	TGCCTCGTGGGTGAGTCGATGGATAGCAGCTATAAATTGATCTTC	CLVGESMDSSYKLIF	TRAV4		TRAJ12	TRA
PBMC-Naive-alpha	1105	32	0.0001	TGTGCAGCAATCTCAGGAAACACACCTCTTGTCTTT	CAAISGNTPLVF	TRAV29/DV5		TRAJ29	TRA
PBMC-Naive-alpha	1106	32	0.0001	TGTGGCCCCCGAATATATGGTCAGAATTTTGTCTTT	CGPRIYGQNFVF	TRAV30		TRAJ26	TRA
PBMC-Naive-alpha	1107	32	0.0001	TGTGCAGGGTCGAGCCAAACTGGGGCAAACAACCTCTTCTTT	CAGSSQTGANNLFF	TRAV25		TRAJ36	TRA
PBMC-Naive-alpha	1108	32	0.0001	TGTGCAGAGACCTCTGTGGTCTCAGGAACCTACAAATACATCTTT	CAETSVVSGTYKYIF	TRAV5		TRAJ40	TRA
PBMC-Naive-alpha	1109	32	0.0001	TGTGCTGTCCCGCCGATCAAAGCTGCAGGCAACAAGCTAACTTTT	CAVPPIKAAGNKLTF	TRAV21		TRAJ17	TRA
PBMC-Naive-alpha	1110	32	0.0001	TGTGCTGTTCGGATGGATAGCAGCTATAAATTGATCTTC	CAVRMDSSYKLIF	TRAV21		TRAJ12	TRA
PBMC-Naive-alpha	1111	32	0.0001	TGTGCTTATAGGAGGGGCAATGGTGCTACAAACAAGCTCATCTTT	CAYRRGNGATNKLIF	TRAV38-2/DV8		TRAJ32	TRA
PBMC-Naive-alpha	1112	32	0.0001	TGTGCTCTGAGTGAAAACGACTACAAGCTCAGCTTT	CALSENDYKLSF	TRAV9-2		TRAJ20	TRA
PBMC-Naive-alpha	1113	32	0.0001	TGTGCTGCGGCAGACGGAGATGACAAGATCATCTTT	CAAADGDDKIIF	TRAV22		TRAJ30	TRA
PBMC-Naive-alpha	1114	32	0.0001	TGTGGAGCAGACGGAGGAGGTGCTGACGGACTCACCTTT	CGADGGGADGLTF	TRAV34		TRAJ45	TRA
PBMC-Naive-alpha	1115	32	0.0001	TGTGCAGCTTTTCCTGGAGCAGGAACTGCTCTGATCTTT	CAAFPGAGTALIF	TRAV13-1		TRAJ15	TRA
PBMC-Naive-alpha	1116	32	0.0001	TGTGCTCTGAGTAGAATATCAGATGGCCAGAAGCTGCTCTTT	CALSRISDGQKLLF	TRAV9-2		TRAJ16	TRA
PBMC-Naive-alpha	1117	32	0.0001	TGTGCTGTGGGGCCCAATTCTGGGGGTTACCAGAAAGTTACCTTT	CAVGPNSGGYQKVTF	TRAV21		TRAJ13	TRA
PBMC-Naive-alpha	1118	32	0.0001	GCTTCCGGGTATGCACTCAACTTC	ASGYALNF	TRAV22		TRAJ41	TRA
PBMC-Naive-alpha	1119	32	0.0001	TGTGCTTATAGGACCACTCAGGGCGGATCTGAAAAGCTGGTCTTT	CAYRTTQGGSEKLVF	TRAV38-2/DV8		TRAJ57	TRA
PBMC-Naive-alpha	1120	32	0.0001	TGTGCCCAAAACCAGGCAGGAACTGCTCTGATCTTT	CAQNQAGTALIF	TRAV24		TRAJ15	TRA
PBMC-Naive-alpha	1121	32	0.0001	TGTGGAGCAGACGACTCTGGGGCTGGGAGTTACCAACTCACTTTC	CGADDSGAGSYQLTF	TRAV34		TRAJ28	TRA
PBMC-Naive-alpha	1122	32	0.0001	TGTGCTGGGCGTCATGGCAATGACATGCGCTTT	CAGRHGNDMRF	TRAV35		TRAJ43	TRA
PBMC-Naive-alpha	1123	32	0.0001	TGTGCAGGATGGGGATCTGGTGGCTACAATAAGCTGATTTTT	CAGWGSGGYNKLIF	TRAV5		TRAJ4	TRA
PBMC-Naive-alpha	1124	32	0.0001	TGTGCTCTGACCTACAATGACATGCGCTTT	CALTYNDMRF	TRAV9-2		TRAJ43	TRA
PBMC-Naive-alpha	1125	32	0.0001	TGTGCTGTCAGTCGGGGTAGCAACTATAAACTGACATTT	CAVSRGSNYKLTF	TRAV41		TRAJ53	TRA
PBMC-Naive-alpha	1126	32	0.0001	TGTGCTCTGCGAACAGGCTTTCAGAAACTTGTATTT	CALRTGFQKLVF	TRAV9-2		TRAJ8	TRA
PBMC-Naive-alpha	1127	32	0.0001	TGCGCTCTGATTATGGATAGCAGCTATAAATTGATCTTC	CALIMDSSYKLIF	TRAV1-1		TRAJ12	TRA
PBMC-Naive-alpha	1128	32	0.0001	TGTGCAGAGATCATCTCTGGCAACACAGGCAAACTAATCTTT	CAEIISGNTGKLIF	TRAV13-2		TRAJ37	TRA
PBMC-Naive-alpha	1129	32	0.0001	TGTGTGGTGAGCGAGTGGGCTAATGACATGCGCTTT	CVVSEWANDMRF	TRAV10		TRAJ43	TRA
PBMC-Naive-alpha	1130	32	0.0001	TGTGCGGGACTTGATAACTATGGTCAGAATTTTGTCTTT	CAGLDNYGQNFVF	TRAV25		TRAJ26	TRA
PBMC-Naive-alpha	1131	32	0.0001	TGTGCCCCTCGAGGCAATGACATGCGCTTT	CAPRGNDMRF	TRAV21		TRAJ43	TRA
PBMC-Naive-alpha	1132	32	0.0001	TGTGCTGTGGATCTCGAAGGGCAGAAGCTGCTCTTT	CAVDLEGQKLLF	TRAV2		TRAJ16	TRA
PBMC-Naive-alpha	1133	32	0.0001	TGTGCTCTGAGTGAAAGCCAGGCAGGAACTGCTCTGATCTTT	CALSESQAGTALIF	TRAV9-2		TRAJ15	TRA
PBMC-Naive-alpha	1134	32	0.0001	TGTGCTGTGGAGGATCCGACTAACTTTGGAAATGAGAAATTAACCTTT	CAVEDPTNFGNEKLTF	TRAV2		TRAJ48	TRA
PBMC-Naive-alpha	1135	32	0.0001	TGTGCTGTGCAGGACAATGCCAGACTCATGTTT	CAVQDNARLMF	TRAV21		TRAJ31	TRA
PBMC-Naive-alpha	1136	32	0.0001	TGTGCTTCCCTCCTAACTAACACCGACAAGCTCATCTTT	CASLLTNTDKLIF	TRAV38-2/DV8		TRAJ34	TRA
PBMC-Naive-alpha	1137	32	0.0001	TGCATCGTCAGTGTTTTAAAGCTCAGCTTT	CIVSVLKLSF	TRAV26-1		TRAJ20	TRA
PBMC-Naive-alpha	1138	32	0.0001	TGTGCTTTCAGCCCAAACTTTGGAAATGAGAAATTAACCTTT	CAFSPNFGNEKLTF	TRAV38-1		TRAJ48	TRA
PBMC-Naive-alpha	1139	32	0.0001	TGTGCTGGGCCCAACGGGGGTTACCAGAAAGTTACCTTT	CAGPNGGYQKVTF	TRAV35		TRAJ13	TRA
PBMC-Naive-alpha	1140	32	0.0001	TGTGCAGCAAGTATAGTCGGGACAGGCTTTCAGAAACTTGTATTT	CAASIVGTGFQKLVF	TRAV13-1		TRAJ8	TRA
PBMC-Naive-alpha	1141	32	0.0001	TGTGCTCTGAGTGATCGTTACAACTTCAACAAATTTTACTTT	CALSDRYNFNKFYF	TRAV9-2		TRAJ21	TRA
PBMC-Naive-alpha	1142	32	0.0001	TGCCTCGTGGGTGCCTTCAAAGCTGCAGGCAACAAGCTAACTTTT	CLVGAFKAAGNKLTF	TRAV4		TRAJ17	TRA
PBMC-Naive-alpha	1143	32	0.0001	TGTGCTGTGTCTCCCATGAACAGAGATGACAAGATCATCTTT	CAVSPMNRDDKIIF	TRAV21		TRAJ30	TRA
PBMC-Naive-alpha	1144	32	0.0001	TGTGTGGTCCGCGATGGGGGAAGCCAAGGAAATCTCATCTTT	CVVRDGGSQGNLIF	TRAV12-1		TRAJ42	TRA
PBMC-Naive-alpha	1145	32	0.0001	TGTGCAGCAACCTCCACACTGGGCAGACTCGCTTTT	CAATSTLGRLAF	TRAV13-1		TRAJ7	TRA
PBMC-Naive-alpha	1146	32	0.0001	TGTGCATCCTTTACCGGCACTGCCAGTAAACTCACCTTT	CASFTGTASKLTF	TRAV5		TRAJ44	TRA
PBMC-Naive-alpha	1147	32	0.0001	TGTGCTGTGGACCATAGGGGCAATGCCAGACTCATGTTT	CAVDHRGNARLMF	TRAV2		TRAJ31	TRA
PBMC-Naive-alpha	1148	32	0.0001	TGCCTCGTGGGTGGGTACAGCAGTGCTTCCAAGATAATCTTT	CLVGGYSSASKIIF	TRAV4		TRAJ3	TRA
PBMC-Naive-alpha	1149	32	0.0001	TGTGCTGGGCGGGCCCGGAGTGCTGACGGACTCACCTTT	CAGRARSADGLTF	TRAV35		TRAJ45	TRA
PBMC-Naive-alpha	1150	32	0.0001	TGTGCAGCAAGCCCGGCTGGTGGAGGAAGCCAAGGAAATCTCATCTTT	CAASPAGGGSQGNLIF	TRAV23/DV6		TRAJ42	TRA
PBMC-Naive-alpha	1151	32	0.0001	TGTGCTTATAGAGACAGAGATGACAAGATCATCTTT	CAYRDRDDKIIF	TRAV38-2/DV8		TRAJ30	TRA
PBMC-Naive-alpha	1152	32	0.0001	TGTGCTGTGAGGGATTTAATTCAGGGAGCCCAGAAGCTGGTATTT	CAVRDLIQGAQKLVF	TRAV21		TRAJ54	TRA
PBMC-Naive-alpha	1153	32	0.0001	TGTGCTGCCAATGCAGGCAAATCAACCTTT	CAANAGKSTF	TRAV21		TRAJ27	TRA
PBMC-Naive-alpha	1154	32	0.0001	TGTGCTCTGACGGATAGCAGCTATAAATTGATCTTC	CALTDSSYKLIF	TRAV9-2		TRAJ12	TRA
PBMC-Naive-alpha	1155	32	0.0001	TGTGCTGTGGTTCTAGATGGCCAGAAGCTGCTCTTT	CAVVLDGQKLLF	TRAV2		TRAJ16	TRA
PBMC-Naive-alpha	1156	32	0.0001	TGTGCTGTGTGGAATAACAATGCCAGACTCATGTTT	CAVWNNNARLMF	TRAV21		TRAJ31	TRA
PBMC-Naive-alpha	1157	32	0.0001	TGTGCAGAGAGTAAAGGGGGTGCTACAAACAAGCTCATCTTT	CAESKGGATNKLIF	TRAV5		TRAJ32	TRA
PBMC-Naive-alpha	1158	32	0.0001	TGTGCTGTCCTTACTTCTTATAACACCGACAAGCTCATCTTT	CAVLTSYNTDKLIF	TRAV2		TRAJ34	TRA
PBMC-Naive-alpha	1159	32	0.0001	TGTGCAGCAAGTTATGGAGGCTTCAAAACTATCTTT	CAASYGGFKTIF	TRAV13-1		TRAJ9	TRA
PBMC-Naive-alpha	1160	32	0.0001	TGTGCTCTCGCCCGGGCTGGAGCCAATAGTAAGCTGACATTT	CALARAGANSKLTF	TRAV9-2		TRAJ56	TRA
PBMC-Naive-alpha	1161	32	0.0001	TGTGCTCTGAGTGATTGGCAGGGAGCCCAGAAGCTGGTATTT	CALSDWQGAQKLVF	TRAV9-2		TRAJ54	TRA
PBMC-Naive-alpha	1162	32	0.0001	TGTGCTCTGAGCGTAAAAAGCAGCGGAGACAAGCTGACTTTT	CALSVKSSGDKLTF	TRAV9-2		TRAJ46	TRA
PBMC-Naive-alpha	1163	32	0.0001	TGTGCCTACCGTCGAAACACACCTCTTGTCTTT	CAYRRNTPLVF	TRAV38-2/DV8		TRAJ29	TRA
PBMC-Naive-alpha	1164	32	0.0001	TGTGCTGTTGCATCAGGAGGAAGCTACATACCTACATTT	CAVASGGSYIPTF	TRAV21		TRAJ6	TRA
PBMC-Naive-alpha	1165	32	0.0001	TGTGCAGGGCCTTTTTTAAAAGGTGGTGCTACAAACAAGCTCATCTTT	CAGPFLKGGATNKLIF	TRAV25		TRAJ32	TRA
PBMC-Naive-alpha	1166	32	0.0001	TGTGCTGTGCGGGTTGGAGCCAATAGTAAGCTGACATTT	CAVRVGANSKLTF	TRAV21		TRAJ56	TRA
PBMC-Naive-alpha	1167	32	0.0001	TGTGCTGGGCCCTATGGAGGAAGCCAAGGAAATCTCATCTTT	CAGPYGGSQGNLIF	TRAV35		TRAJ42	TRA
PBMC-Naive-alpha	1168	32	0.0001	TGTGCAGAGATTAATCAACTTTCAGATGGCCAGAAGCTGCTCTTT	CAEINQLSDGQKLLF	TRAV13-2		TRAJ16	TRA
PBMC-Naive-alpha	1169	32	0.0001	TGTGCAGCATACAACTTCAACAAATTTTACTTT	CAAYNFNKFYF	TRAV29/DV5		TRAJ21	TRA
PBMC-Naive-alpha	1170	32	0.0001	TGTGCTGCCTCGCGAGGCATGCGCTTT	CAASRGMRF	TRAV21		TRAJ43	TRA
PBMC-Naive-alpha	1171	32	0.0001	TGTGCTGGGCAAAGGGACTCAAATTCCGGGTATGCACTCAACTTC	CAGQRDSNSGYALNF	TRAV35		TRAJ41	TRA
PBMC-Naive-alpha	1172	32	0.0001	TGTGCAGGGGAGAATTCAGGAAACACACCTCTTGTCTTT	CAGENSGNTPLVF	TRAV25		TRAJ29	TRA
PBMC-Naive-alpha	1173	32	0.0001	TGTGCACCAAAAGGGAATAACAATGCCAGACTCATGTTT	CAPKGNNNARLMF	TRAV13-2		TRAJ31	TRA
PBMC-Naive-alpha	1174	32	0.0001	TGTGCTCTATCCGAAACCAGTGGCTCTAGGTTGACCTTT	CALSETSGSRLTF	TRAV16		TRAJ58	TRA
PBMC-Naive-alpha	1175	31	0.0001	TGTGGCACAGCGGGGCTAATTCAGGGAGCCCAGAAGCTGGTATTT	CGTAGLIQGAQKLVF	TRAV30		TRAJ54	TRA
PBMC-Naive-alpha	1176	31	0.0001	TGTGCTACGGATTCTAATGCTGGTGGTACTAGCTATGGAAAGCTGACATTT	CATDSNAGGTSYGKLTF	TRAV17		TRAJ52	TRA
PBMC-Naive-alpha	1177	31	0.0001	TGTGCTTTCATGAATTATGGTCAGAATTTTGTCTTT	CAFMNYGQNFVF	TRAV38-1		TRAJ26	TRA
PBMC-Naive-alpha	1178	31	0.0001	TGTGCTGCCGGCCGAGAGAGCTGGGGGAAATTGCAGTTT	CAAGRESWGKLQF	TRAV21		TRAJ24	TRA
PBMC-Naive-alpha	1179	31	0.0001	TGTGCTGGGCGTGAAGGGACCAGTGGCTCTAGGTTGACCTTT	CAGREGTSGSRLTF	TRAV35		TRAJ58	TRA
PBMC-Naive-alpha	1180	31	0.0001	TGTGCTCTGAGCAGTAAGCTGATTTTT	CALSSKLIF	TRAV9-2		TRAJ4	TRA
PBMC-Naive-alpha	1181	31	0.0001	TGTGCTTGCCTAGCTGGTGGTACTAGCTATGGAAAGCTGACATTT	CACLAGGTSYGKLTF	TRAV38-2/DV8		TRAJ52	TRA
PBMC-Naive-alpha	1182	31	0.0001	TGTGCCTTCCTTTCGGGTGGAGGCTTCAAAACTATCTTT	CAFLSGGGFKTIF	TRAV24		TRAJ9	TRA
PBMC-Naive-alpha	1183	31	0.0001	TGTGCAGCAAATAACGACTACAAGCTCAGCTTT	CAANNDYKLSF	TRAV13-1		TRAJ20	TRA
PBMC-Naive-alpha	1184	31	0.0001	TGTGCTCTGAGTGATATAAATAACAATGACATGCGCTTT	CALSDINNNDMRF	TRAV9-2		TRAJ43	TRA
PBMC-Naive-alpha	1185	31	0.0001	TGTGCTGTGGATGGAGGAAACACACCTCTTGTCTTT	CAVDGGNTPLVF	TRAV2		TRAJ29	TRA
PBMC-Naive-alpha	1186	31	0.0001	TGTGCTCTGGGGGGGAAGACCAATGCAGGCAAATCAACCTTT	CALGGKTNAGKSTF	TRAV9-2		TRAJ27	TRA
PBMC-Naive-alpha	1187	31	0.0001	TGTGCTCTGAGTGAAAGAACCGGTAACCAGTTCTATTTT	CALSERTGNQFYF	TRAV9-2		TRAJ49	TRA
PBMC-Naive-alpha	1188	31	0.0001	TGTGCTGTCACATCAGGAGGAAGCTACATACCTACATTT	CAVTSGGSYIPTF	TRAV2		TRAJ6	TRA
PBMC-Naive-alpha	1189	31	0.0001	TGTGCATCCCCATCCCATACTGGAGCCAATAGTAAGCTGACATTT	CASPSHTGANSKLTF	TRAV13-1		TRAJ56	TRA
PBMC-Naive-alpha	1190	31	0.0001	TGTGCCCCCCCGGGCAGTGCTTCCAAGATAATCTTT	CAPPGSASKIIF	TRAV9-2		TRAJ3	TRA
PBMC-Naive-alpha	1191	31	0.0001	TGTGCAGCGTATAGCAACTATCAGTTAATCTGG	CAAYSNYQLIW	TRAV29/DV5		TRAJ33	TRA
PBMC-Naive-alpha	1192	31	0.0001	TGTGCAGCCTATATAGGTAGCAACTATAAACTGACATTT	CAAYIGSNYKLTF	TRAV13-1		TRAJ53	TRA
PBMC-Naive-alpha	1193	31	0.0001	TGTGCCCTAGGATATGGAAACAAACTGGTCTTT	CALGYGNKLVF	TRAV9-2		TRAJ47	TRA
PBMC-Naive-alpha	1194	31	0.0001	TGTGCTCTTAGCGGTGGTCAGAATTTTGTCTTT	CALSGGQNFVF	TRAV9-2		TRAJ26	TRA
PBMC-Naive-alpha	1195	31	0.0001	TGTGTGGTGAGCGACGGAGGAAGCTACATACCTACATTT	CVVSDGGSYIPTF	TRAV10		TRAJ6	TRA
PBMC-Naive-alpha	1196	31	0.0001	TGTGCTCTACATAACTATGGTCAGAATTTTGTCTTT	CALHNYGQNFVF	TRAV9-2		TRAJ26	TRA
PBMC-Naive-alpha	1197	31	0.0001	TGTGCAGCAAGTAAGTGGACAGGCAACAAGCTAACTTTT	CAASKWTGNKLTF	TRAV13-1		TRAJ17	TRA
PBMC-Naive-alpha	1198	31	0.0001	TGCCTCGTGGGTGTCAATACTGGAGGCTTCAAAACTATCTTT	CLVGVNTGGFKTIF	TRAV4		TRAJ9	TRA
PBMC-Naive-alpha	1199	31	0.0001	TGTGCTCTGGGGAAAGAGGGAGCCCAGAAGCTGGTATTT	CALGKEGAQKLVF	TRAV9-2		TRAJ54	TRA
PBMC-Naive-alpha	1200	31	0.0001	TGTGCTGTGCCCAACCAGGCAGGAACTGCTCTGATCTTT	CAVPNQAGTALIF	TRAV21		TRAJ15	TRA
PBMC-Naive-alpha	1201	31	0.0001	TGTGCTGTGGAGCACCCCTATGCTGGTGGTACTAGCTATGGAAAGCTGACATTT	CAVEHPYAGGTSYGKLTF	TRAV22		TRAJ52	TRA
PBMC-Naive-alpha	1202	31	0.0001	TGTGCTGCCCTCTCCATAGGCTTTGGGAATGTGCTGCATTGC	CAALSIGFGNVLHC	TRAV21		TRAJ35	TRA
PBMC-Naive-alpha	1203	31	0.0001	TGTGCTGCCCTCGGAACCTACAAATACATCTTT	CAALGTYKYIF	TRAV38-2/DV8		TRAJ40	TRA
PBMC-Naive-alpha	1204	31	0.0001	TGTGCTTATAGTCGTACCGGCACTGCCAGTAAACTCACCTTT	CAYSRTGTASKLTF	TRAV38-2/DV8		TRAJ44	TRA
PBMC-Naive-alpha	1205	31	0.0001	TGTGCTCTGAGTGATAATGTAGGAGGAGGTGCTGACGGACTCACCTTT	CALSDNVGGGADGLTF	TRAV9-2		TRAJ45	TRA
PBMC-Naive-alpha	1206	31	0.0001	TGTGCTTATAGATGTGACATGCGCTTT	CAYRCDMRF	TRAV38-2/DV8		TRAJ43	TRA
PBMC-Naive-alpha	1207	31	0.0001	TGTGCTCTGGCGTCCGGGGACTACAAGCTCAGCTTT	CALASGDYKLSF	TRAV9-2		TRAJ20	TRA
PBMC-Naive-alpha	1208	31	0.0001	TGTGCTTTCATGATAAATGACATGCGCTTT	CAFMINDMRF	TRAV38-1		TRAJ43	TRA
PBMC-Naive-alpha	1209	31	0.0001	TGTGCTGTGGAGCCAGGAGGAGGTGCTGACGGACTCACCTTT	CAVEPGGGADGLTF	TRAV36/DV7		TRAJ45	TRA
PBMC-Naive-alpha	1210	31	0.0001	TGTGCTGCGCTGCGATCTTATAACACCGACAAGCTCATCTTT	CAALRSYNTDKLIF	TRAV21		TRAJ34	TRA
PBMC-Naive-alpha	1211	31	0.0001	TGTGCTGGGCGGAAAAATGCTGGCAACAACCGTAAGCTGATTTGG	CAGRKNAGNNRKLIW	TRAV35		TRAJ38	TRA
PBMC-Naive-alpha	1212	31	0.0001	TGTGCTGTGGAGGATCAAAACAATGCCAGACTCATGTTT	CAVEDQNNARLMF	TRAV2		TRAJ31	TRA
PBMC-Naive-alpha	1213	31	0.0001	TGTGCAGCAAGCGTGGCAGGAACCTACAAATACATCTTT	CAASVAGTYKYIF	TRAV29/DV5		TRAJ40	TRA
PBMC-Naive-alpha	1214	31	0.0001	TGTGCTGTGCTTCATGCAGGCAACATGCTCACCTTT	CAVLHAGNMLTF	TRAV21		TRAJ39	TRA
PBMC-Naive-alpha	1215	31	0.0001	TGTGTGGTGAGGGTTCGTGGCTACAATAAGCTGATTTTT	CVVRVRGYNKLIF	TRAV10		TRAJ4	TRA
PBMC-Naive-alpha	1216	31	0.0001	TGTGCTCTCACTATAGGCTTTGGGAATGTGCTGCATTGC	CALTIGFGNVLHC	TRAV16		TRAJ35	TRA
PBMC-Naive-alpha	1217	31	0.0001	TGTGCTGTGAGTGTATCCGGTGGTACTAGCTATGGAAAGCTGACATTT	CAVSVSGGTSYGKLTF	TRAV8-4		TRAJ52	TRA
PBMC-Naive-alpha	1218	31	0.0001	TGTGCTCTGACTCAAACTGGGGCAAACAACCTCTTCTTT	CALTQTGANNLFF	TRAV9-2		TRAJ36	TRA
PBMC-Naive-alpha	1219	31	0.0001	TGTGCTGTGGTAGTATCTTCTGGTTCTGCAAGGCAACTGACCTTT	CAVVVSSGSARQLTF	TRAV22		TRAJ22	TRA
PBMC-Naive-alpha	1220	31	0.0001	TGTGCTGTGGTCAATAACAATGACATGCGCTTT	CAVVNNNDMRF	TRAV36/DV7		TRAJ43	TRA
PBMC-Naive-alpha	1221	31	0.0001	TGTGCAACTAATGCAGGCAACATGCTCACCTTT	CATNAGNMLTF	TRAV29/DV5		TRAJ39	TRA
PBMC-Naive-alpha	1222	31	0.0001	TGTGGCACCCCCCGGTCAGGTAGCAACTATAAACTGACATTT	CGTPRSGSNYKLTF	TRAV30		TRAJ53	TRA
PBMC-Naive-alpha	1223	31	0.0001	TGTGCTTATAGGAGCGCCTTGTATGGAGGAAGCCAAGGAAATCTCATCTTT	CAYRSALYGGSQGNLIF	TRAV38-2/DV8		TRAJ42	TRA
PBMC-Naive-alpha	1224	31	0.0001	TGTGCTGGGCGCATACAGGGCGGATCTGAAAAGCTGGTCTTT	CAGRIQGGSEKLVF	TRAV35		TRAJ57	TRA
PBMC-Naive-alpha	1225	31	0.0001	TGTGCTGGTCCGTACTCTGGGGCTGGGAGTTACCAACTCACTTTC	CAGPYSGAGSYQLTF	TRAV35		TRAJ28	TRA
PBMC-Naive-alpha	1226	31	0.0001	TGTGCTCTGAAACAAATGTCAGGGTCAGGAGGAGGTGCTGACGGACTCACCTTT	CALKQMSGSGGGADGLTF	TRAV9-2		TRAJ45	TRA
PBMC-Naive-alpha	1227	31	0.0001	TGTGCAGCATTTTATGGTGGTGCTACAAACAAGCTCATCTTT	CAAFYGGATNKLIF	TRAV13-1		TRAJ32	TRA
PBMC-Naive-alpha	1228	31	0.0001	TGTGCTCTCTCCGCCACGGGCAGGAGAGCACTTACTTTT	CALSATGRRALTF	TRAV6		TRAJ5	TRA
PBMC-Naive-alpha	1229	31	0.0001	TGTGCTGTGACGGGTAGCAACTATCAGTTAATCTGG	CAVTGSNYQLIW	TRAV21		TRAJ33	TRA
PBMC-Naive-alpha	1230	31	0.0001	TGTGCTCTGGCTGACAGCTGGGGGAAATTGCAGTTT	CALADSWGKLQF	TRAV9-2		TRAJ24	TRA
PBMC-Naive-alpha	1231	31	0.0001	TGTGCTCTGAGTCCAGACGACTACAAGCTCAGCTTT	CALSPDDYKLSF	TRAV9-2		TRAJ20	TRA
PBMC-Naive-alpha	1232	31	0.0001	TGTGCAGGGGCCTCTGGCAACACAGGCAAACTAATCTTT	CAGASGNTGKLIF	TRAV27		TRAJ37	TRA
PBMC-Naive-alpha	1233	31	0.0001	TGTGCTCTGAGTGGTTCTAACGACTACAAGCTCAGCTTT	CALSGSNDYKLSF	TRAV9-2		TRAJ20	TRA
PBMC-Naive-alpha	1234	31	0.0001	TGTGCTTTCATGAAGCATCTCTCGGGAGGAGGTGCTGACGGACTCACCTTT	CAFMKHLSGGGADGLTF	TRAV38-1		TRAJ45	TRA
PBMC-Naive-alpha	1235	31	0.0001	TGTGCTCTGAGTGCCCCCCAAGGGAACAACAGACTCGCTTTT	CALSAPQGNNRLAF	TRAV9-2		TRAJ7	TRA
PBMC-Naive-alpha	1236	31	0.0001	TGTGCAGCAAGTAAGGGAGGAAGCTACATACCTACATTT	CAASKGGSYIPTF	TRAV13-1		TRAJ6	TRA
PBMC-Naive-alpha	1237	31	0.0001	TGTGCAGGAGAGGGGTCCGGGTATGCACTCAACTTC	CAGEGSGYALNF	TRAV27		TRAJ41	TRA
PBMC-Naive-alpha	1238	31	0.0001	TGTGCTCTGAGGACCTCTAACGACTACAAGCTCAGCTTT	CALRTSNDYKLSF	TRAV9-2		TRAJ20	TRA
PBMC-Naive-alpha	1239	31	0.0001	TGCATCGTCAGAGTCGGCTCTGGCAACACAGGCAAACTAATCTTT	CIVRVGSGNTGKLIF	TRAV26-1		TRAJ37	TRA
PBMC-Naive-alpha	1240	31	0.0001	TGTGCTGTGGAGGATCTGGGCTTTGGGAATGTGCTGCATTGC	CAVEDLGFGNVLHC	TRAV2		TRAJ35	TRA
PBMC-Naive-alpha	1241	31	0.0001	TGTGCTGTGCAGGCCCGAGGTTCTGCAAGGCAACTGACCTTT	CAVQARGSARQLTF	TRAV20		TRAJ22	TRA
PBMC-Naive-alpha	1242	31	0.0001	TGTGCAGAGAACCGGTACAATAACAATGACATGCGCTTT	CAENRYNNNDMRF	TRAV13-2		TRAJ43	TRA
PBMC-Naive-alpha	1243	31	0.0001	TGTGCTCTGAGTGATCGGATGAACACACCTCTTGTCTTT	CALSDRMNTPLVF	TRAV9-2		TRAJ29	TRA
PBMC-Naive-alpha	1244	31	0.0001	TGTGCTCCCTATGGGGCAGGAACTGCTCTGATCTTT	CAPYGAGTALIF	TRAV1-2		TRAJ15	TRA
PBMC-Naive-alpha	1245	31	0.0001	TGTGCTCTGAGATTACGTTCTAACGACTACAAGCTCAGCTTT	CALRLRSNDYKLSF	TRAV9-2		TRAJ20	TRA
PBMC-Naive-alpha	1246	31	0.0001	TGTGCAGCAAGCGCGGAAAGGACCAATGCAGGCAAATCAACCTTT	CAASAERTNAGKSTF	TRAV29/DV5		TRAJ27	TRA
PBMC-Naive-alpha	1247	31	0.0001	TGTGCTGTGGACAGCAACTATCAGTTAATCTGG	CAVDSNYQLIW	TRAV2		TRAJ33	TRA
PBMC-Naive-alpha	1248	31	0.0001	TGTGCAATGTCCCCGGGGCAGGGAGCCCAGAAGCTGGTATTT	CAMSPGQGAQKLVF	TRAV12-3		TRAJ54	TRA
PBMC-Naive-alpha	1249	31	0.0001	TGTGCTGTGAGGCCGGGTAGTGGAGGTAGCAACTATAAACTGACATTT	CAVRPGSGGSNYKLTF	TRAV21		TRAJ53	TRA
PBMC-Naive-alpha	1250	31	0.0001	TGTGCCCCGTACAGCAGTGCTTCCAAGATAATCTTT	CAPYSSASKIIF	TRAV24		TRAJ3	TRA
PBMC-Naive-alpha	1251	31	0.0001	TGTGCTCTGAGCGAGGGGGTTAACTTTGGAAATGAGAAATTAACCTTT	CALSEGVNFGNEKLTF	TRAV9-2		TRAJ48	TRA
PBMC-Naive-alpha	1252	31	0.0001	TGTGCGTATACCGGCACTGCCAGTAAACTCACCTTT	CAYTGTASKLTF	TRAV21		TRAJ44	TRA
PBMC-Naive-alpha	1253	31	0.0001	TGTGCTCTGAGGCCCTGGGATCTCGCAGGCAACATGCTCACCTTT	CALRPWDLAGNMLTF	TRAV9-2		TRAJ39	TRA
PBMC-Naive-alpha	1254	31	0.0001	TGTGCTCCCGGCGGGGGGTCTGAAAAGCTGGTCTTT	CAPGGGSEKLVF	TRAV21		TRAJ57	TRA
PBMC-Naive-alpha	1255	31	0.0001	TGTGCTGTGGAGGATCTCGGAAGCCAAGGAAATCTCATCTTT	CAVEDLGSQGNLIF	TRAV2		TRAJ42	TRA
PBMC-Naive-alpha	1256	31	0.0001	TGTGCTCTAGAGGCTGGCAACAACCGTAAGCTGATTTGG	CALEAGNNRKLIW	TRAV6		TRAJ38	TRA
PBMC-Naive-alpha	1257	31	0.0001	TGTGCTTATAGGATTACCGGCACTGCCAGTAAACTCACCTTT	CAYRITGTASKLTF	TRAV38-2/DV8		TRAJ44	TRA
PBMC-Naive-alpha	1258	31	0.0001	TGTGCTTATAGGAGCAGCTGGGGGAAATTGCAGTTT	CAYRSSWGKLQF	TRAV38-2/DV8		TRAJ24	TRA
PBMC-Naive-alpha	1259	31	0.0001	TGTGCTGGGCCCCGGAATTATGGAGGAAGCCAAGGAAATCTCATCTTT	CAGPRNYGGSQGNLIF	TRAV35		TRAJ42	TRA
PBMC-Naive-alpha	1260	31	0.0001	TGTGCAGCAAGTTCGGATAGCAGCTATAAATTGATCTTC	CAASSDSSYKLIF	TRAV29/DV5		TRAJ12	TRA
PBMC-Naive-alpha	1261	31	0.0001	TGTGTGGTGGGCCGTTATAATACCGGCACTGCCAGTAAACTCACCTTT	CVVGRYNTGTASKLTF	TRAV12-1		TRAJ44	TRA
PBMC-Naive-alpha	1262	31	0.0001	TGTGCAGCAAGTAACTCAGGAACCTACAAATACATCTTT	CAASNSGTYKYIF	TRAV13-1		TRAJ40	TRA
PBMC-Naive-alpha	1263	31	0.0001	TGTGCTTTCATGAAGCATGGGCGATCTTTGCATCAGTTAATCTGG	CAFMKHGRSLHQLIW	TRAV38-1		TRAJ33	TRA
PBMC-Naive-alpha	1264	31	0.0001	TGTGCTCTGATAACCCGAGCCAATAGTAAGCTGACATTT	CALITRANSKLTF	TRAV9-2		TRAJ56	TRA
PBMC-Naive-alpha	1265	31	0.0001	TGTGCTGTGGAGGACTTCAATACTGGAGGCTTCAAAACTATCTTT	CAVEDFNTGGFKTIF	TRAV2		TRAJ9	TRA
PBMC-Naive-alpha	1266	31	0.0001	TGTGCAGCAAGCTTTAACAATGACATGCGCTTT	CAASFNNDMRF	TRAV29/DV5		TRAJ43	TRA
PBMC-Naive-alpha	1267	31	0.0001	TGTGCTGTGAGAAGAGATGACAAGATCATCTTT	CAVRRDDKIIF	TRAV21		TRAJ30	TRA
PBMC-Naive-alpha	1268	31	0.0001	TGTGCTGTGGGTCGGACCGGTAACCAGTTCTATTTT	CAVGRTGNQFYF	TRAV22		TRAJ49	TRA
PBMC-Naive-alpha	1269	31	0.0001	TGCGCTGTGAGAGTCCCAAACCAGGCAGGAACTGCTCTGATCTTT	CAVRVPNQAGTALIF	TRAV1-1		TRAJ15	TRA
PBMC-Naive-alpha	1270	31	0.0001	TGTGCAGAGAGTAGGCACACGGGCAGGAGAGCACTTACTTTT	CAESRHTGRRALTF	TRAV5		TRAJ5	TRA
PBMC-Naive-alpha	1271	31	0.0001	TGTGCTGTGAGAACCGAATATGGAAACAAACTGGTCTTT	CAVRTEYGNKLVF	TRAV21		TRAJ47	TRA
PBMC-Naive-alpha	1272	31	0.0001	TGTGCTTATAGTAGGAATAACAATGCCAGACTCATGTTT	CAYSRNNNARLMF	TRAV38-2/DV8		TRAJ31	TRA
PBMC-Naive-alpha	1273	31	0.0001	TGTGCTGGGCGAATTCAGGGAGCCCAGAAGCTGGTATTT	CAGRIQGAQKLVF	TRAV35		TRAJ54	TRA
PBMC-Naive-alpha	1274	31	0.0001	TGTGCTGGGCAGCTGACGACCTCCTACGACAAGGTGATATTT	CAGQLTTSYDKVIF	TRAV35		TRAJ50	TRA
PBMC-Naive-alpha	1275	31	0.0001	TGTGCTTTCATGAAGCCCAATGCAGGCAACATGCTCACCTTT	CAFMKPNAGNMLTF	TRAV38-1		TRAJ39	TRA
PBMC-Naive-alpha	1276	31	0.0001	TGTGCTCTGAGTGTCCCGAACAACCTCTTCTTT	CALSVPNNLFF	TRAV9-2		TRAJ36	TRA
PBMC-Naive-alpha	1277	31	0.0001	TGTGCAGCGGGACGGATGGATAGCAGCTATAAATTGATCTTC	CAAGRMDSSYKLIF	TRAV29/DV5		TRAJ12	TRA
PBMC-Naive-alpha	1278	31	0.0001	TGTGCTCTGAGTGATCACAGTGGGAACAACAGACTCGCTTTT	CALSDHSGNNRLAF	TRAV9-2		TRAJ7	TRA
PBMC-Naive-alpha	1279	31	0.0001	TGTGCTTTCACGCGAAATAATGCAGGCAACATGCTCACCTTT	CAFTRNNAGNMLTF	TRAV38-1		TRAJ39	TRA
PBMC-Naive-alpha	1280	31	0.0001	TGTGCTCTAAGTGGTAATACAGGAGGAGGTGCTGACGGACTCACCTTT	CALSGNTGGGADGLTF	TRAV16		TRAJ45	TRA
PBMC-Naive-alpha	1281	31	0.0001	TGCCTCGTGGGTGAAAGAGGATACAGCACCCTCACCTTT	CLVGERGYSTLTF	TRAV4		TRAJ11	TRA
PBMC-Naive-alpha	1282	31	0.0001	TGTGCTGGGCCCCTCAACGGGAACAACAGACTCGCTTTT	CAGPLNGNNRLAF	TRAV35		TRAJ7	TRA
PBMC-Naive-alpha	1283	31	0.0001	TGTGCAGAGACTTTTTCAGGAAACACACCTCTTGTCTTT	CAETFSGNTPLVF	TRAV5		TRAJ29	TRA
PBMC-Naive-alpha	1284	31	0.0001	TGTGCAGAGAGTAGTCATGCTGGCAACAACCGTAAGCTGATTTGG	CAESSHAGNNRKLIW	TRAV5		TRAJ38	TRA
PBMC-Naive-alpha	1285	31	0.0001	TGTGCTGTCATAGGAGGAGGTGCTGACGGACTCACCTTT	CAVIGGGADGLTF	TRAV41		TRAJ45	TRA
PBMC-Naive-alpha	1286	31	0.0001	TGTGCAGAGATCGCGAATAATGCAGGCAACATGCTCACCTTT	CAEIANNAGNMLTF	TRAV13-2		TRAJ39	TRA
PBMC-Naive-alpha	1287	31	0.0001	TGTGCTTTCATGAAAGATAATAATGCAGGCAACATGCTCACCTTT	CAFMKDNNAGNMLTF	TRAV38-1		TRAJ39	TRA
PBMC-Naive-alpha	1288	31	0.0001	TGTGCAGCAAGTGAGACGGGCAGGAGAGCACTTACTTTT	CAASETGRRALTF	TRAV13-1		TRAJ5	TRA
PBMC-Naive-alpha	1289	31	0.0001	TGTGCAGAGATTCCGAGGGGTGACAAGATCATCTTT	CAEIPRGDKIIF	TRAV5		TRAJ30	TRA
PBMC-Naive-alpha	1290	31	0.0001	TGTGGCACAGAGGCTCAGGGAGCCCAGAAGCTGGTATTT	CGTEAQGAQKLVF	TRAV30		TRAJ54	TRA
PBMC-Naive-alpha	1291	31	0.0001	TGTGCTCTGACGGCCAGCAGCTATAAATTGATCTTC	CALTASSYKLIF	TRAV9-2		TRAJ12	TRA
PBMC-Naive-alpha	1292	31	0.0001	TGTGCTCTGAGTGATTACCCAGGGCAGGCAGGAACTGCTCTGATCTTT	CALSDYPGQAGTALIF	TRAV9-2		TRAJ15	TRA
PBMC-Naive-alpha	1293	31	0.0001	TGTGCTGACTTTAACGACTACAAGCTCAGCTTT	CADFNDYKLSF	TRAV13-1		TRAJ20	TRA
PBMC-Naive-alpha	1294	31	0.0001	TGTGCGGCCCGGGAGTCAACCTTT	CAARESTF	TRAV1-2		TRAJ27	TRA
PBMC-Naive-alpha	1295	31	0.0001	TGTGCTCTTCCTCCTGCCAATGCAGGCAAATCAACCTTT	CALPPANAGKSTF	TRAV9-2		TRAJ27	TRA
PBMC-Naive-alpha	1296	31	0.0001	TGTGCTGTGGGGGGAGCTGCAGGCAACAAGCTAACTTTT	CAVGGAAGNKLTF	TRAV21		TRAJ17	TRA
PBMC-Naive-alpha	1297	31	0.0001	TGTGCTCTGAGCGATAATAGTGACATGCGCTTT	CALSDNSDMRF	TRAV9-2		TRAJ43	TRA
PBMC-Naive-alpha	1298	31	0.0001	TGTGCTGCAGGGGGTTCTGCAAGGCAACTGACCTTT	CAAGGSARQLTF	TRAV2		TRAJ22	TRA
PBMC-Naive-alpha	1299	30	0.0001	TGTGGCACAGATACCTCAGGAACCTACAAATACATCTTT	CGTDTSGTYKYIF	TRAV30		TRAJ40	TRA
PBMC-Naive-alpha	1300	30	0.0001	TGTGCACTAAATTCTGGGGCTGGGAGTTACCAACTCACTTTC	CALNSGAGSYQLTF	TRAV9-2		TRAJ28	TRA
PBMC-Naive-alpha	1301	30	0.0001	TGTGCTACGGACGTAAAGAGCAACTATCAGTTAATCTGG	CATDVKSNYQLIW	TRAV17		TRAJ33	TRA
PBMC-Naive-alpha	1302	30	0.0001	TGTGCAGGACGACCAAGGATGGATAGCAGCTATAAATTGATCTTC	CAGRPRMDSSYKLIF	TRAV25		TRAJ12	TRA
PBMC-Naive-alpha	1303	30	0.0001	TGTGCTACGAACACAGGCTTTCAGAAACTTGTATTT	CATNTGFQKLVF	TRAV21		TRAJ8	TRA
PBMC-Naive-alpha	1304	30	0.0001	TGTGAAAGTGGAGGTAGCAACTATAAACTGACATTT	CESGGSNYKLTF	TRAV36/DV7		TRAJ53	TRA
PBMC-Naive-alpha	1305	30	0.0001	TGTGGAGCAGGTTCTGGGGGTTACCAGAAAGTTACCTTT	CGAGSGGYQKVTF	TRAV34		TRAJ13	TRA
PBMC-Naive-alpha	1306	30	0.0001	TGTGCAGCAGATGACAGCTGGGGGAAATTGCAGTTT	CAADDSWGKLQF	TRAV13-1		TRAJ24	TRA
PBMC-Naive-alpha	1307	30	0.0001	TGTGGTTCAGGAGGAGGTGCTGACGGACTCACCTTT	CGSGGGADGLTF	TRAV21		TRAJ45	TRA
PBMC-Naive-alpha	1308	30	0.0001	TGTGCTGTGGAGGAAACCTCCTACGACAAGGTGATATTT	CAVEETSYDKVIF	TRAV21		TRAJ50	TRA
PBMC-Naive-alpha	1309	30	0.0001	TGTGCTGTGCGAGGGGGTTACCAGAAAGTTACCTTT	CAVRGGYQKVTF	TRAV21		TRAJ13	TRA
PBMC-Naive-alpha	1310	30	0.0001	TGTGCTGTGTCAGGAACCTACAAATACATCTTT	CAVSGTYKYIF	TRAV21		TRAJ40	TRA
PBMC-Naive-alpha	1311	30	0.0001	TGTGCTGTGGAGGACACAGGAAACACACCTCTTGTCTTT	CAVEDTGNTPLVF	TRAV2		TRAJ29	TRA
PBMC-Naive-alpha	1312	30	0.0001	TGTGCTGTGCAGGAGATTCCGGGCAACACAGGCAAACTAATCTTT	CAVQEIPGNTGKLIF	TRAV20		TRAJ37	TRA
PBMC-Naive-alpha	1313	30	0.0001	TGTGCAGCAATGGATAGCAGCTATAAATTGATCTTC	CAAMDSSYKLIF	TRAV13-1		TRAJ12	TRA
PBMC-Naive-alpha	1314	30	0.0001	TGTGCTGTGAGCCCCATCCAGGGAGGAAAGCTTATCTTC	CAVSPIQGGKLIF	TRAV1-2		TRAJ23	TRA
PBMC-Naive-alpha	1315	30	0.0001	TGTGCTCTGAGGACATTTGCAAACTTCAACAAATTTTACTTT	CALRTFANFNKFYF	TRAV9-2		TRAJ21	TRA
PBMC-Naive-alpha	1316	30	0.0001	TGTGCCCCGAATTCAGGAAACACACCTCTTGTCTTT	CAPNSGNTPLVF	TRAV2		TRAJ29	TRA
PBMC-Naive-alpha	1317	30	0.0001	TGTGCTGTGAGTGAGGATTATGGAGGAAGCCAAGGAAATCTCATCTTT	CAVSEDYGGSQGNLIF	TRAV8-4		TRAJ42	TRA
PBMC-Naive-alpha	1318	30	0.0001	TGTGCTACGGACGCTTGGGGAGCCCAGAAGCTGGTATTT	CATDAWGAQKLVF	TRAV17		TRAJ54	TRA
PBMC-Naive-alpha	1319	30	0.0001	TGTGGCACAGAGGTTGAAGGACAAGGCTTCTCCTTTATCTTT	CGTEVEGQGFSFIF	TRAV30		TRAJ25	TRA
PBMC-Naive-alpha	1320	30	0.0001	TGTGCCCTACAGGGAGCCCAGAAGCTGGTATTT	CALQGAQKLVF	TRAV9-2		TRAJ54	TRA
PBMC-Naive-alpha	1321	30	0.0001	TGTGCTCTTAGAGGAGGAAACACACCTCTTGTCTTT	CALRGGNTPLVF	TRAV9-2		TRAJ29	TRA
PBMC-Naive-alpha	1322	30	0.0001	TGTGCTGGGGAAAGACGAGCGGGAGGAAGCTACATACCTACATTT	CAGERRAGGSYIPTF	TRAV9-2		TRAJ6	TRA
PBMC-Naive-alpha	1323	30	0.0001	TGTGCTGCCTCGGATAGCAACTATCAGTTAATCTGG	CAASDSNYQLIW	TRAV1-2		TRAJ33	TRA
PBMC-Naive-alpha	1324	30	0.0001	TGTGCAGCAAGCTCTACCGGCACTGCCAGTAAACTCACCTTT	CAASSTGTASKLTF	TRAV29/DV5		TRAJ44	TRA
PBMC-Naive-alpha	1325	30	0.0001	TGTGCTGTGGCCACCAATGCAGGCAAATCAACCTTT	CAVATNAGKSTF	TRAV36/DV7		TRAJ27	TRA
PBMC-Naive-alpha	1326	30	0.0001	TGTGCTCTGAGTGATCGGTGGAACACCGGTAACCAGTTCTATTTT	CALSDRWNTGNQFYF	TRAV9-2		TRAJ49	TRA
PBMC-Naive-alpha	1327	30	0.0001	TGTGCTGTGAGGCCTCCGGCAGGAACTGCTCTGATCTTT	CAVRPPAGTALIF	TRAV21		TRAJ15	TRA
PBMC-Naive-alpha	1328	30	0.0001	TGTGCTTATAACGACTACAAGCTCAGCTTT	CAYNDYKLSF	TRAV38-2/DV8		TRAJ20	TRA
PBMC-Naive-alpha	1329	30	0.0001	TGTGCGGGCCCTTCTGGTGGCTACAATAAGCTGATTTTT	CAGPSGGYNKLIF	TRAV36/DV7		TRAJ4	TRA
PBMC-Naive-alpha	1330	30	0.0001	TGTGCTCCCGGGGGAGGGAGTGCTACAAACAAGCTCATCTTT	CAPGGGSATNKLIF	TRAV6		TRAJ32	TRA
PBMC-Naive-alpha	1331	30	0.0001	TGTGCTGTCCATAACTATGGTCAGAATTTTGTCTTT	CAVHNYGQNFVF	TRAV22		TRAJ26	TRA
PBMC-Naive-alpha	1332	30	0.0001	TGTGGCACAGAGGAGTTAAACGACTACAAGCTCAGCTTT	CGTEELNDYKLSF	TRAV30		TRAJ20	TRA
PBMC-Naive-alpha	1333	30	0.0001	TGTGCTGTGGGGAACAACTTCAACAAATTTTACTTT	CAVGNNFNKFYF	TRAV22		TRAJ21	TRA
PBMC-Naive-alpha	1334	30	0.0001	TGTGCAGCAGACACGGGAGGAGGAAACAAACTCACCTTT	CAADTGGGNKLTF	TRAV13-1		TRAJ10	TRA
PBMC-Naive-alpha	1335	30	0.0001	TGCCTCGTGGGTGGCAACCAGGCAGGAACTGCTCTGATCTTT	CLVGGNQAGTALIF	TRAV4		TRAJ15	TRA
PBMC-Naive-alpha	1336	30	0.0001	TGTGCTCTGAATTCCATGGATAGCAACTATCAGTTAATCTGG	CALNSMDSNYQLIW	TRAV9-2		TRAJ33	TRA
PBMC-Naive-alpha	1337	30	0.0001	TGTGCTCTCCATGCAGCTGCAGGCAACAAGCTAACTTTT	CALHAAAGNKLTF	TRAV9-2		TRAJ17	TRA
PBMC-Naive-alpha	1338	30	0.0001	TGTGCTTTCGTGGGGATGAACAGAGATGACAAGATCATCTTT	CAFVGMNRDDKIIF	TRAV38-1		TRAJ30	TRA
PBMC-Naive-alpha	1339	30	0.0001	TGTGTGGTGAGATACAATGCCAGACTCATGTTT	CVVRYNARLMF	TRAV10		TRAJ31	TRA
PBMC-Naive-alpha	1340	30	0.0001	TGTGCCTCCCTGGAATATGGAAACAAGCTGGTCTTT	CASLEYGNKLVF	TRAV17		TRAJ47	TRA
PBMC-Naive-alpha	1341	30	0.0001	TGTGCTGTGGAGGGAAATGGCCCGGGAGCCCAGAAGCTGGTATTT	CAVEGNGPGAQKLVF	TRAV36/DV7		TRAJ54	TRA
PBMC-Naive-alpha	1342	30	0.0001	TGTGCTGTGAGGCCGATTTCTTCTGGTTCTGCAAGGCAACTGACCTTT	CAVRPISSGSARQLTF	TRAV21		TRAJ22	TRA
PBMC-Naive-alpha	1343	30	0.0001	TGTGCTGGGCGGCCCCCCTCAGGAACCTACAAATACATCTTT	CAGRPPSGTYKYIF	TRAV35		TRAJ40	TRA
PBMC-Naive-alpha	1344	30	0.0001	TGTGCTCCCCGGGAGGCTAACAGAGATGACAAGATCATCTTT	CAPREANRDDKIIF	TRAV21		TRAJ30	TRA
PBMC-Naive-alpha	1345	30	0.0001	TGTGCTGTGGAGGTCGCGCCGTTTTCTGGTGGCTACAATAAGCTGATTTTT	CAVEVAPFSGGYNKLIF	TRAV2		TRAJ4	TRA
PBMC-Naive-alpha	1346	30	0.0001	TGTGCTGTCCTCCAGGCAGGAACTGCTCTGATCTTT	CAVLQAGTALIF	TRAV22		TRAJ15	TRA
PBMC-Naive-alpha	1347	30	0.0001	TGTGCTCTGAGAGGCTCTGGGGCTGGGAGTTACCAACTCACTTTC	CALRGSGAGSYQLTF	TRAV9-2		TRAJ28	TRA
PBMC-Naive-alpha	1348	30	0.0001	TGTGCAGCAAGTGACTACGACTACAAGCTCAGCTTT	CAASDYDYKLSF	TRAV13-1		TRAJ20	TRA
PBMC-Naive-alpha	1349	30	0.0001	TGTGCTGCGACGATAGGCTTTGGGAATGTGCTGCATTGC	CAATIGFGNVLHC	TRAV21		TRAJ35	TRA
PBMC-Naive-alpha	1350	30	0.0001	TGCGGGCTATATAACACCAATGCAGGCAAATCAACCTTT	CGLYNTNAGKSTF	TRAV36/DV7		TRAJ27	TRA
PBMC-Naive-alpha	1351	30	0.0001	TGTGCTCTGAGTGGGACGGGAGGAGGAAACAAACTCACCTTT	CALSGTGGGNKLTF	TRAV9-2		TRAJ10	TRA
PBMC-Naive-alpha	1352	30	0.0001	TGTGGAGCAGACACCGGCACTGCCAGTAAACTCACCTTT	CGADTGTASKLTF	TRAV34		TRAJ44	TRA
PBMC-Naive-alpha	1353	30	0.0001	TGTGCAGCAAGTATTACCTCAGGAACCTACAAATACATCTTT	CAASITSGTYKYIF	TRAV29/DV5		TRAJ40	TRA
PBMC-Naive-alpha	1354	30	0.0001	TGTGCTCTGAGTGATCGCCACAGCAGTGCTTCCAAGATAATCTTT	CALSDRHSSASKIIF	TRAV9-2		TRAJ3	TRA
PBMC-Naive-alpha	1355	30	0.0001	TGTGCTCTGAGTGATAAATCTGGTGGCTACAATAAGCTGATTTTT	CALSDKSGGYNKLIF	TRAV9-2		TRAJ4	TRA
PBMC-Naive-alpha	1356	30	0.0001	TGTGCTTTCATTGATACCTCAGGAACCTACAAATACATCTTT	CAFIDTSGTYKYIF	TRAV38-1		TRAJ40	TRA
PBMC-Naive-alpha	1357	30	0.0001	TGTGCTCTGGCCAATACCGGCACTGCCAGTAAACTCACCTTT	CALANTGTASKLTF	TRAV9-2		TRAJ44	TRA
PBMC-Naive-alpha	1358	30	0.0001	TGTGCTGTGAGAGTAACTGCAAGGCAACTGACCTTT	CAVRVTARQLTF	TRAV21		TRAJ22	TRA
PBMC-Naive-alpha	1359	30	0.0001	TGTGCAGCCCTATACGGCCAGAAAGTTACCTTT	CAALYGQKVTF	TRAV29/DV5		TRAJ13	TRA
PBMC-Naive-alpha	1360	30	0.0001	TGTGCAGCAAGTGGTAGGTATTCAGGAGGAGGTGCTGACGGACTCACCTTT	CAASGRYSGGGADGLTF	TRAV13-1		TRAJ45	TRA
PBMC-Naive-alpha	1361	30	0.0001	TGTGCTGTGAGCTTCGGTTATAACACCGACAAGCTCATCTTT	CAVSFGYNTDKLIF	TRAV21		TRAJ34	TRA
PBMC-Naive-alpha	1362	30	0.0001	TGTGCTGTGAGACGTGCTTCCAAGATAATCTTT	CAVRRASKIIF	TRAV21		TRAJ3	TRA
PBMC-Naive-alpha	1363	30	0.0001	TGCATCGTCAGGTCCTTTAGTGGTGCTACAAACAAGCTCATCTTT	CIVRSFSGATNKLIF	TRAV26-1		TRAJ32	TRA
PBMC-Naive-alpha	1364	30	0.0001	TGCATCGTCAGAGTAGCCGGGGCAAACAACCTCTTCTTT	CIVRVAGANNLFF	TRAV26-1		TRAJ36	TRA
PBMC-Naive-alpha	1365	30	0.0001	TGTGCAGAGATACTCACGGGAGGAGGAAACAAACTCACCTTT	CAEILTGGGNKLTF	TRAV13-2		TRAJ10	TRA
PBMC-Naive-alpha	1366	30	0.0001	TGTGCTGTCCTGGGGCTCACGGGAGGAGGAAACAAACTCACCTTT	CAVLGLTGGGNKLTF	TRAV2		TRAJ10	TRA
PBMC-Naive-alpha	1367	30	0.0001	TGTGCTACGGAGAGGGGTTACCAGAAAGTTACCTTT	CATERGYQKVTF	TRAV17		TRAJ13	TRA
PBMC-Naive-alpha	1368	30	0.0001	TGTGCTGAGCCTGATTCAGGAGGAGGTGCTGACGGACTCACCTTT	CAEPDSGGGADGLTF	TRAV35		TRAJ45	TRA
PBMC-Naive-alpha	1369	30	0.0001	TGTGCTGTGGAGGATCTTAAGGACTACAAGCTCAGCTTT	CAVEDLKDYKLSF	TRAV2		TRAJ20	TRA
PBMC-Naive-alpha	1370	30	0.0001	TGTGCTCTGTACACCTCATCAGGAGGAAGCTACATACCTACATTT	CALYTSSGGSYIPTF	TRAV9-2		TRAJ6	TRA
PBMC-Naive-alpha	1371	30	0.0001	TGTGCAGCAAGTTTCGGATACAGCACCCTCACCTTT	CAASFGYSTLTF	TRAV13-1		TRAJ11	TRA
PBMC-Naive-alpha	1372	30	0.0001	TGTGCTGTGCTCCCACATAATGCAGGCAACATGCTCACCTTT	CAVLPHNAGNMLTF	TRAV21		TRAJ39	TRA
PBMC-Naive-alpha	1373	30	0.0001	TGTGCTCTGAGACCGAATTCTGGGGGTTACCAGAAAGTTACCTTT	CALRPNSGGYQKVTF	TRAV19		TRAJ13	TRA
PBMC-Naive-alpha	1374	30	0.0001	TGTGCTTTCATGAAGCTTAATAATGCAGGCAACATGCTCACCTTT	CAFMKLNNAGNMLTF	TRAV38-1		TRAJ39	TRA
PBMC-Naive-alpha	1375	30	0.0001	TGTGCTGTGACTGGGGGTTACCAGAAAGTTACCTTT	CAVTGGYQKVTF	TRAV21		TRAJ13	TRA
PBMC-Naive-alpha	1376	30	0.0001	TGTGCAGCAACCCCTTCAAATGGCCAGAAGCTGCTCTTT	CAATPSNGQKLLF	TRAV13-1		TRAJ16	TRA
PBMC-Naive-alpha	1377	30	0.0001	TGTGCTTTCACGCAGGGCGGATCTGAAAAGCTGGTCTTT	CAFTQGGSEKLVF	TRAV38-1		TRAJ57	TRA
PBMC-Naive-alpha	1378	30	0.0001	TGTGCGACAGGGGAAACCAGTGGCTCTAGGTTGACCTTT	CATGETSGSRLTF	TRAV36/DV7		TRAJ58	TRA
PBMC-Naive-alpha	1379	30	0.0001	TGTGCTTGGGGGACCGGCACTGCCAGTAAACTCACCTTT	CAWGTGTASKLTF	TRAV38-2/DV8		TRAJ44	TRA
PBMC-Naive-alpha	1380	30	0.0001	TGTGCTGTAACGCAAGCTGCAGGCAACAAGCTAACTTTT	CAVTQAAGNKLTF	TRAV21		TRAJ17	TRA
PBMC-Naive-alpha	1381	30	0.0001	TGTGCTGTGAGGAGCGGCAACAACCGTAAGCTGATTTGG	CAVRSGNNRKLIW	TRAV1-2		TRAJ38	TRA
PBMC-Naive-alpha	1382	30	0.0001	TGTGCTGTGGGCAATTCAGGATACAGCACCCTCACCTTT	CAVGNSGYSTLTF	TRAV21		TRAJ11	TRA
PBMC-Naive-alpha	1383	30	0.0001	TGTGCTGCCCCCCCCCCGGATAGCAGCTATAAATTGATCTTC	CAAPPPDSSYKLIF	TRAV21		TRAJ12	TRA
PBMC-Naive-alpha	1384	30	0.0001	TGTGCAGCAAGTATAGAGGGAGGCTTCAAAACTATCTTT	CAASIEGGFKTIF	TRAV13-1		TRAJ9	TRA
PBMC-Naive-alpha	1385	30	0.0001	TGTGGCACAGAGAAGGGTGGAGGTAGCAACTATAAACTGACATTT	CGTEKGGGSNYKLTF	TRAV30		TRAJ53	TRA
PBMC-Naive-alpha	1386	30	0.0001	TGCATCGTCAAGAATAACAATGCCAGACTCATGTTT	CIVKNNNARLMF	TRAV26-1		TRAJ31	TRA
PBMC-Naive-alpha	1387	30	0.0001	TGTGCTGTGCTGCCTGGTGGCTACAATAAGCTGATTTTT	CAVLPGGYNKLIF	TRAV20		TRAJ4	TRA
PBMC-Naive-alpha	1388	30	0.0001	TGTGCTCTGCTCCCAACTGACAGCTGGGGGAAATTGCAGTTT	CALLPTDSWGKLQF	TRAV9-2		TRAJ24	TRA
PBMC-Naive-alpha	1389	30	0.0001	TGTGCTGTGAGTGATCTCCAGGGAGCCCAGAAGCTGGTATTT	CAVSDLQGAQKLVF	TRAV8-4		TRAJ54	TRA
PBMC-Naive-alpha	1390	30	0.0001	TGTGTGGTGAGCTTCACCGGTAACCAGTTCTATTTT	CVVSFTGNQFYF	TRAV10		TRAJ49	TRA
PBMC-Naive-alpha	1391	30	0.0001	TGTGCTCTGAGAACGGGAGGAGGAAACAAACTCACCTTT	CALRTGGGNKLTF	TRAV9-2		TRAJ10	TRA
PBMC-Naive-alpha	1392	30	0.0001	TGTGCTGTGGAGAACACCGACAAGCTCATCTTT	CAVENTDKLIF	TRAV2		TRAJ34	TRA
PBMC-Naive-alpha	1393	30	0.0001	TGTGCAGCTTCGACTGGAGGCTTCAAAACTATCTTT	CAASTGGFKTIF	TRAV13-1		TRAJ9	TRA
PBMC-Naive-alpha	1394	30	0.0001	TGTGCAGGGCGGGAAACCAGTGGCTCTAGGTTGACCTTT	CAGRETSGSRLTF	TRAV25		TRAJ58	TRA
PBMC-Naive-alpha	1395	30	0.0001	TGTGCTCTGGGCCGGATGGATAGCAGCTATAAATTGATCTTC	CALGRMDSSYKLIF	TRAV9-2		TRAJ12	TRA
PBMC-Naive-alpha	1396	30	0.0001	TGTGCTTTCATCCCTTATAACACCGACAAGCTCATCTTT	CAFIPYNTDKLIF	TRAV38-1		TRAJ34	TRA
PBMC-Naive-alpha	1397	30	0.0001	TGTGCTCTGAGTGCGGGGTACAGCAGTGCTTCCAAGATAATCTTT	CALSAGYSSASKIIF	TRAV9-2		TRAJ3	TRA
PBMC-Naive-alpha	1398	30	0.0001	TGTGCTGTTCATGGCTCTGGCAACACAGGCAAACTAATCTTT	CAVHGSGNTGKLIF	TRAV1-2		TRAJ37	TRA
PBMC-Naive-alpha	1399	30	0.0001	TGTGCAGCACCGCGGCACAGAGGCTCAACCCTGGGGAGGCTATACTTT	CAAPRHRGSTLGRLYF	TRAV29/DV5		TRAJ18	TRA
PBMC-Naive-alpha	1400	30	0.0001	TGTGCAGGAGCTCCCCGCAATAACAATGCCAGACTCATGTTT	CAGAPRNNNARLMF	TRAV27		TRAJ31	TRA
PBMC-Naive-alpha	1401	30	0.0001	TGTGCTCTGGGCACGGGCAGGAGAGCACTTACTTTT	CALGTGRRALTF	TRAV9-2		TRAJ5	TRA
PBMC-Naive-alpha	1402	30	0.0001	TGTGCTGTGTGTCCGGGAGGAAGCTACATACCTACATTT	CAVCPGGSYIPTF	TRAV22		TRAJ6	TRA
PBMC-Naive-alpha	1403	30	0.0001	TGTGCTGTTACTTCTGGTTCTGCAAGGCAACTGACCTTT	CAVTSGSARQLTF	TRAV21		TRAJ22	TRA
PBMC-Naive-alpha	1404	30	0.0001	TGTGCTGTGAGTAGGGTTGGTGGTACTAGCTATGGAAAGCTGACATTT	CAVSRVGGTSYGKLTF	TRAV21		TRAJ52	TRA
PBMC-Naive-alpha	1405	30	0.0001	TGTGCAGGTATTAATACTGGAGGCTTCAAAACTATCTTT	CAGINTGGFKTIF	TRAV27		TRAJ9	TRA
PBMC-Naive-alpha	1406	30	0.0001	TGTGCTTGTGCTCTGAGGCCAAATGCAGGCAACATGCTCACCTTT	CACALRPNAGNMLTF	TRAV9-2		TRAJ39	TRA
PBMC-Naive-alpha	1407	30	0.0001	TGTGCAGAGATGGGCTATGGTGGTGCTACAAACAAGCTCATCTTT	CAEMGYGGATNKLIF	TRAV13-2		TRAJ32	TRA
PBMC-Naive-alpha	1408	30	0.0001	TGTGCAGCTTTGAACACAGGCTTTCAGAAACTTGTATTT	CAALNTGFQKLVF	TRAV13-1		TRAJ8	TRA
PBMC-Naive-alpha	1409	30	0.0001	TGTGCTCTGAGTGGGAACACCAATGCAGGCAAATCAACCTTT	CALSGNTNAGKSTF	TRAV9-2		TRAJ27	TRA
PBMC-Naive-alpha	1410	30	0.0001	TGCCTCGTGGGTGACTTAAACACGGGCAGGAGAGCACTTACTTTT	CLVGDLNTGRRALTF	TRAV4		TRAJ5	TRA
PBMC-Naive-alpha	1411	30	0.0001	TGTGCAGCAAACGAGAACAGAGATGACAAGATCATCTTT	CAANENRDDKIIF	TRAV13-1		TRAJ30	TRA
PBMC-Naive-alpha	1412	30	0.0001	TGTGCTGTGGAGGAGAATTCAGGATACAGCACCCTCACCTTT	CAVEENSGYSTLTF	TRAV2		TRAJ11	TRA
PBMC-Naive-alpha	1413	30	0.0001	TACAGCACCCTCACCTTT	YSTLTF	TRAV2		TRAJ11	TRA
PBMC-Naive-alpha	1414	30	0.0001	TGTGCAGCAACCCCTATTTCCGGGTATGCACTCAACTTC	CAATPISGYALNF	TRAV13-1		TRAJ41	TRA
PBMC-Naive-alpha	1415	30	0.0001	TGTGCTCTGAGTTCTGGGGGTTACCAGAAAGTTACCTTT	CALSSGGYQKVTF	TRAV9-2		TRAJ13	TRA
PBMC-Naive-alpha	1416	30	0.0001	TGTGCTGTGCAGGCACAGGGAGACTACAAGCTCAGCTTT	CAVQAQGDYKLSF	TRAV20		TRAJ20	TRA
PBMC-Naive-alpha	1417	30	0.0001	TGTGCTGTGAGGCCGACAACTGACAGCTGGGGGAAATTGCAGTTT	CAVRPTTDSWGKLQF	TRAV21		TRAJ24	TRA
PBMC-Naive-alpha	1418	30	0.0001	TGTGCTCTGAGCTCCGGGGATAGCAGCTATAAATTGATCTTC	CALSSGDSSYKLIF	TRAV9-2		TRAJ12	TRA
PBMC-Naive-alpha	1419	30	0.0001	TGTGCTGTGTTGTTTTCTGGTGGCTACAATAAGCTGATTTTT	CAVLFSGGYNKLIF	TRAV21		TRAJ4	TRA
PBMC-Naive-alpha	1420	30	0.0001	TGTGCTTATAGGTCAGGGATGGATAGCAGCTATAAATTGATCTTC	CAYRSGMDSSYKLIF	TRAV38-2/DV8		TRAJ12	TRA
PBMC-Naive-alpha	1421	30	0.0001	TGTGCAGAGTCTGTTAACCAGGGAGGAAAGCTTATCTTC	CAESVNQGGKLIF	TRAV5		TRAJ23	TRA
PBMC-Naive-alpha	1422	30	0.0001	TGTGCAGAGAGTATTGGGAAGCTGATTTTT	CAESIGKLIF	TRAV5		TRAJ4	TRA
PBMC-Naive-alpha	1423	30	0.0001	TGTGCTCTGACCCTGGATGGCCAGAAGCTGCTCTTT	CALTLDGQKLLF	TRAV9-2		TRAJ16	TRA
PBMC-Naive-alpha	1424	30	0.0001	TGTGCTCTGCGGGGGAACACAGGCTTTCAGAAACTTGTATTT	CALRGNTGFQKLVF	TRAV9-2		TRAJ8	TRA
PBMC-Naive-alpha	1425	30	0.0001	TGTGCTCTGAGATCCGGCACGGGCAGGAGAGCACTTACTTTT	CALRSGTGRRALTF	TRAV9-2		TRAJ5	TRA
PBMC-Naive-alpha	1426	30	0.0001	TGTGCAGCCCCTGGTAGCAGTGCTTCCAAGATAATCTTT	CAAPGSSASKIIF	TRAV13-1		TRAJ3	TRA
PBMC-Naive-alpha	1427	30	0.0001	TGTGCTGGGCAGAGAGGTGCTGGTGGTACTAGCTATGGAAAGCTGACATTT	CAGQRGAGGTSYGKLTF	TRAV35		TRAJ52	TRA
PBMC-Naive-alpha	1428	30	0.0001	TGTGTGGTGAGCCGTACGAACACAGGCTTTCAGAAACTTGTATTT	CVVSRTNTGFQKLVF	TRAV10		TRAJ8	TRA
PBMC-Naive-alpha	1429	30	0.0001	TGTGCTTTCAAGGGTGGCCAAGGAAATCTCATCTTT	CAFKGGQGNLIF	TRAV38-1		TRAJ42	TRA
PBMC-Naive-alpha	1430	30	0.0001	TGTGCTCTAGGCGACTACAAGCTCAGCTTT	CALGDYKLSF	TRAV6		TRAJ20	TRA
PBMC-Naive-alpha	1431	30	0.0001	TGTGCTCTGATAAGGAGCACGGGCAGGAGAGCACTTACTTTT	CALIRSTGRRALTF	TRAV9-2		TRAJ5	TRA
PBMC-Naive-alpha	1432	30	0.0001	TGTGCTCTGAGTGATTGGGAAACCAGTGGCTCTAGGTTGACCTTT	CALSDWETSGSRLTF	TRAV9-2		TRAJ58	TRA
PBMC-Naive-alpha	1433	30	0.0001	TGTGCTGTGGTAGGAAACACACCTCTTGTCTTT	CAVVGNTPLVF	TRAV21		TRAJ29	TRA
PBMC-Naive-alpha	1434	30	0.0001	TGTGCTGCGGAAGAAACCAGTGGCTCTAGGTTGACCTTT	CAAEETSGSRLTF	TRAV21		TRAJ58	TRA
PBMC-Naive-alpha	1435	30	0.0001	TGCCTCGTGGGGATTCCTTCTGGTTCTGCAAGGCAACTGACCTTT	CLVGIPSGSARQLTF	TRAV4		TRAJ22	TRA
PBMC-Naive-alpha	1436	30	0.0001	TGTGCAGCACTATACTATGGTCAGAATTTTGTCTTT	CAALYYGQNFVF	TRAV13-1		TRAJ26	TRA
PBMC-Naive-alpha	1437	30	0.0001	TGTGCTTATAGGGGCTACCTCCTTACCGGCACTGCCAGTAAACTCACCTTT	CAYRGYLLTGTASKLTF	TRAV38-2/DV8		TRAJ44	TRA
PBMC-Naive-alpha	1438	30	0.0001	TGTGTGGTGAACCCCAAGGATAGCAGCTATAAATTGATCTTC	CVVNPKDSSYKLIF	TRAV12-1		TRAJ12	TRA
PBMC-Naive-alpha	1439	30	0.0001	TGTGTGGTGAGCTCGTCTCTTTCCGGGTATGCACTCAACTTC	CVVSSSLSGYALNF	TRAV10		TRAJ41	TRA
PBMC-Naive-alpha	1440	29	0.0001	TGTGCTCTGAGTGACGGCAGCTGGGGGAAATTGCAGTTT	CALSDGSWGKLQF	TRAV9-2		TRAJ24	TRA
PBMC-Naive-alpha	1441	29	0.0001	TGTGCAGCAAGTAGGCGCTTTCAGAAACTTGTATTT	CAASRRFQKLVF	TRAV13-1		TRAJ8	TRA
PBMC-Naive-alpha	1442	29	0.0001	TGTGCTGTGAACCGGGGCGACTACAAGCTCAGCTTT	CAVNRGDYKLSF	TRAV21		TRAJ20	TRA
PBMC-Naive-alpha	1443	29	0.0001	TGTGCTGTGCCGGATAGCAACTATCAGTTAATCTGG	CAVPDSNYQLIW	TRAV21		TRAJ33	TRA
PBMC-Naive-alpha	1444	29	0.0001	TGTGCTGCGCGGGCTTATTCAGGAAACACACCTCTTGTCTTT	CAARAYSGNTPLVF	TRAV2		TRAJ29	TRA
PBMC-Naive-alpha	1445	29	0.0001	TGTGCTGTGAGGCGGATAGGCAGAGATGACAAGATCATCTTT	CAVRRIGRDDKIIF	TRAV21		TRAJ30	TRA
PBMC-Naive-alpha	1446	29	0.0001	TGTGCTGTGTATGACAACTTCAACAAATTTTACTTT	CAVYDNFNKFYF	TRAV2		TRAJ21	TRA
PBMC-Naive-alpha	1447	29	0.0001	TGTGCTGTGAGGACGAGGGGCGGATCTGAAAAGCTGGTCTTT	CAVRTRGGSEKLVF	TRAV21		TRAJ57	TRA
PBMC-Naive-alpha	1448	29	0.0001	TGTGCTTTCATGAAGCATTCGAATAACAATGACATGCGCTTT	CAFMKHSNNNDMRF	TRAV38-1		TRAJ43	TRA
PBMC-Naive-alpha	1449	29	0.0001	TGTGCAGCAAGTTCCTCAGGATACAGCACCCTCACCTTT	CAASSSGYSTLTF	TRAV13-1		TRAJ11	TRA
PBMC-Naive-alpha	1450	29	0.0001	TGTGCAGCAGACCTGGAAGGCTACAATAAGCTGATTTTT	CAADLEGYNKLIF	TRAV13-1		TRAJ4	TRA
PBMC-Naive-alpha	1451	29	0.0001	TGTGCTGTGGGGTATAGAGCTGCAGGCAACAAGCTAACTTTT	CAVGYRAAGNKLTF	TRAV2		TRAJ17	TRA
PBMC-Naive-alpha	1452	29	0.0001	TGTGCTCTGAGTTTCAGAGCTGCAGGCAACAAGCTAACTTTT	CALSFRAAGNKLTF	TRAV9-2		TRAJ17	TRA
PBMC-Naive-alpha	1453	29	0.0001	TGTGCTGTTTTCCTTGCCTCAGGAACCTACAAATACATCTTT	CAVFLASGTYKYIF	TRAV2		TRAJ40	TRA
PBMC-Naive-alpha	1454	29	0.0001	TGTGGCACAAATCTCCCGCGTTTCTGGGGGCAACTGACCTTT	CGTNLPRFWGQLTF	TRAV30		TRAJ22	TRA
PBMC-Naive-alpha	1455	29	0.0001	TGTGGCACCGATGATACTGGAGGCTTCAAAACTATCTTT	CGTDDTGGFKTIF	TRAV30		TRAJ9	TRA
PBMC-Naive-alpha	1456	29	0.0001	TGTGCCTTTAAGACCGGCACTGCCAGTAAACTCACCTTT	CAFKTGTASKLTF	TRAV24		TRAJ44	TRA
PBMC-Naive-alpha	1457	29	0.0001	TGTGCTTTCCGATATACCGGCACTGCCAGTAAACTCACCTTT	CAFRYTGTASKLTF	TRAV38-1		TRAJ44	TRA
PBMC-Naive-alpha	1458	29	0.0001	TGTGCAGCAAGTAGATCTAACTTTGGAAATGAGAAATTAACCTTT	CAASRSNFGNEKLTF	TRAV13-1		TRAJ48	TRA
PBMC-Naive-alpha	1459	29	0.0001	TGCCAACTAGGAGGAAGCTACATACCTACATTT	CQLGGSYIPTF	TRAV4		TRAJ6	TRA
PBMC-Naive-alpha	1460	29	0.0001	TGTGCAGCAACCCTGTTTTCTGGTGGCTACAATAAGCTGATTTTT	CAATLFSGGYNKLIF	TRAV13-1		TRAJ4	TRA
PBMC-Naive-alpha	1461	29	0.0001	TGTGCTGTGAGCACGGGCAGGAGAGCACTTACTTTT	CAVSTGRRALTF	TRAV21		TRAJ5	TRA
PBMC-Naive-alpha	1462	29	0.0001	TGCATCGTCGATCAGGCAGGAACTGCTCTGATCTTT	CIVDQAGTALIF	TRAV26-1		TRAJ15	TRA
PBMC-Naive-alpha	1463	29	0.0001	TGTGCTGTGAGGCCAGACAATGCCAGACTCATGTTT	CAVRPDNARLMF	TRAV21		TRAJ31	TRA
PBMC-Naive-alpha	1464	29	0.0001	TGCCTCGTGGGTGACATATACACCAATGCAGGCAAATCAACCTTT	CLVGDIYTNAGKSTF	TRAV4		TRAJ27	TRA
PBMC-Naive-alpha	1465	29	0.0001	TGTGCTCTCAACTATGGTCAGAATTTTGTCTTT	CALNYGQNFVF	TRAV6		TRAJ26	TRA
PBMC-Naive-alpha	1466	29	0.0001	TGTGTGGTGAGCGCGGGTAGCGGAGGAGGTGCTGACGGACTCACCTTT	CVVSAGSGGGADGLTF	TRAV10		TRAJ45	TRA
PBMC-Naive-alpha	1467	29	0.0001	TGTGCAGGAGGAGCTGCAGGCAACAAGCTAACTTTT	CAGGAAGNKLTF	TRAV27		TRAJ17	TRA
PBMC-Naive-alpha	1468	29	0.0001	TGTGCAGCAAGCGCCCTCGGGGGAAGCCAAGGAAATCTCATCTTT	CAASALGGSQGNLIF	TRAV29/DV5		TRAJ42	TRA
PBMC-Naive-alpha	1469	29	0.0001	TGTGCAGCAAACTATGGTCAGAATTTTGTCTTT	CAANYGQNFVF	TRAV29/DV5		TRAJ26	TRA
PBMC-Naive-alpha	1470	29	0.0001	TGTGCTGTGAGAGCGAACACCAATGCAGGCAAATCAACCTTT	CAVRANTNAGKSTF	TRAV1-2		TRAJ27	TRA
PBMC-Naive-alpha	1471	29	0.0001	TGTGCTGTGAGGAATAGTGGAGGTAGCAACTATAAACTGACATTT	CAVRNSGGSNYKLTF	TRAV21		TRAJ53	TRA
PBMC-Naive-alpha	1472	29	0.0001	TGTGCTGTGACTCCCACGTTGACTGGTGGCTACAATAAGCTGATTTTT	CAVTPTLTGGYNKLIF	TRAV20		TRAJ4	TRA
PBMC-Naive-alpha	1473	29	0.0001	TGTGCTTATACTACCTCAGGAACCTACAAATACATCTTT	CAYTTSGTYKYIF	TRAV38-2/DV8		TRAJ40	TRA
PBMC-Naive-alpha	1474	29	0.0001	TGTGCAGAGGGGGGTAACCAGGGAGGAAAGCTTATCTTC	CAEGGNQGGKLIF	TRAV13-2		TRAJ23	TRA
PBMC-Naive-alpha	1475	29	0.0001	TGTGCTGTGACTGGCAACACAGGCAAACTAATCTTT	CAVTGNTGKLIF	TRAV21		TRAJ37	TRA
PBMC-Naive-alpha	1476	29	0.0001	TGTGCTCTGAGTTTATACAGCAGTGCTTCCAAGATAATCTTT	CALSLYSSASKIIF	TRAV9-2		TRAJ3	TRA
PBMC-Naive-alpha	1477	29	0.0001	TGTGCTTATTGGGGAGGAGGTGCTGACGGACTCACCTTT	CAYWGGGADGLTF	TRAV38-2/DV8		TRAJ45	TRA
PBMC-Naive-alpha	1478	29	0.0001	TGTGCTGCCCCTGGCTTCAACAAATTTTACTTT	CAAPGFNKFYF	TRAV21		TRAJ21	TRA
PBMC-Naive-alpha	1479	29	0.0001	TGTGCAGGGCGACACTCTGGTTCTGCAAGGCAACTGACCTTT	CAGRHSGSARQLTF	TRAV25		TRAJ22	TRA
PBMC-Naive-alpha	1480	29	0.0001	TGTGCTTTCAATTTCAAAGCTGCAGGCAACAAGCTAACTTTT	CAFNFKAAGNKLTF	TRAV38-1		TRAJ17	TRA
PBMC-Naive-alpha	1481	29	0.0001	TGTGCTCTGAGTGATGATGATAACTATGGTCAGAATTTTGTCTTT	CALSDDDNYGQNFVF	TRAV9-2		TRAJ26	TRA
PBMC-Naive-alpha	1482	29	0.0001	TGTGCTCTGAGCCCTACCGGCACTGCCAGTAAACTCACCTTT	CALSPTGTASKLTF	TRAV9-2		TRAJ44	TRA
PBMC-Naive-alpha	1483	29	0.0001	TGCCTCGTGGGTGGGATCCAGGCAGGAACTGCTCTGATCTTT	CLVGGIQAGTALIF	TRAV4		TRAJ15	TRA
PBMC-Naive-alpha	1484	29	0.0001	TGTGCAGCAAGCCGTTTGGGGGACAAGATCATCTTT	CAASRLGDKIIF	TRAV29/DV5		TRAJ30	TRA
PBMC-Naive-alpha	1485	29	0.0001	TGTGTGGTGAGCGACCACTTTAACCAGGCAGGAACTGCTCTGATCTTT	CVVSDHFNQAGTALIF	TRAV10		TRAJ15	TRA
PBMC-Naive-alpha	1486	29	0.0001	TGTGCTGGGCAGCTGGGGTGGACCTCCTACGACAAGGTGATATTT	CAGQLGWTSYDKVIF	TRAV35		TRAJ50	TRA
PBMC-Naive-alpha	1487	29	0.0001	TGTGCAATGAGCGCCATTGAGGGAAACAAGCTGGTCTTT	CAMSAIEGNKLVF	TRAV12-3		TRAJ47	TRA
PBMC-Naive-alpha	1488	29	0.0001	TGTGCTCTGAAGGGAGCCCAGAAGCTGGTATTT	CALKGAQKLVF	TRAV9-2		TRAJ54	TRA
PBMC-Naive-alpha	1489	29	0.0001	TGTGCCGTGACCGCAGGCTTTCAGAAACTTGTATTT	CAVTAGFQKLVF	TRAV12-2		TRAJ8	TRA
PBMC-Naive-alpha	1490	29	0.0001	TGTGTGGTGAATTTTCCCACCGGCACTGCCAGTAAACTCACCTTT	CVVNFPTGTASKLTF	TRAV10		TRAJ44	TRA
PBMC-Naive-alpha	1491	29	0.0001	TGTGGAGCAGACGGGGCTGCAGGCAACAAGCTAACTTTT	CGADGAAGNKLTF	TRAV34		TRAJ17	TRA
PBMC-Naive-alpha	1492	29	0.0001	TGTGCTTATGGCTCGGATGGCCAGAAGCTGCTCTTT	CAYGSDGQKLLF	TRAV38-2/DV8		TRAJ16	TRA
PBMC-Naive-alpha	1493	29	0.0001	TGTGCTACGGAAGGGGACTTTGGAAATGAGAAATTAACCTTT	CATEGDFGNEKLTF	TRAV17		TRAJ48	TRA
PBMC-Naive-alpha	1494	29	0.0001	TGTGCTGTGAGCGCCAACCAGGCAGGAACTGCTCTGATCTTT	CAVSANQAGTALIF	TRAV21		TRAJ15	TRA
PBMC-Naive-alpha	1495	29	0.0001	TGTGCAGCAGGAGCCTCGGCCGGGACGAAAACCTCCTACGACAAGGTGATATTT	CAAGASAGTKTSYDKVIF	TRAV13-1		TRAJ50	TRA
PBMC-Naive-alpha	1496	29	0.0001	TGTGCTTTCATGAAGCCGTTTTCTCCTATGAACAGAGATGACAAGATCATCTTT	CAFMKPFSPMNRDDKIIF	TRAV38-1		TRAJ30	TRA
PBMC-Naive-alpha	1497	29	0.0001	TGTGCTCTGAGTCGTATCATACTCACGGGAGGAGGAAACAAACTCACCTTT	CALSRIILTGGGNKLTF	TRAV9-2		TRAJ10	TRA
PBMC-Naive-alpha	1498	29	0.0001	TGTGCTGTGGGGGGGAAAGAAACCAGTGGCTCTAGGTTGACCTTT	CAVGGKETSGSRLTF	TRAV21		TRAJ58	TRA
PBMC-Naive-alpha	1499	29	0.0001	TGTGGCACAGAGTCTGATGCTGGTGGTACTAGCTATGGAAAGCTGACATTT	CGTESDAGGTSYGKLTF	TRAV30		TRAJ52	TRA
PBMC-Naive-alpha	1500	29	0.0001	TGTGCTTATAGGCTAAATACCGGCACTGCCAGTAAACTCACCTTT	CAYRLNTGTASKLTF	TRAV38-2/DV8		TRAJ44	TRA
PBMC-Naive-alpha	1501	29	0.0001	TGTGCAGCAAGTTCTAATACTGGAGGCTTCAAAACTATCTTT	CAASSNTGGFKTIF	TRAV13-1		TRAJ9	TRA
PBMC-Naive-alpha	1502	29	0.0001	TGTGCCTCGTCGATAGCTGGCAACAACCGTAAGCTGATTTGG	CASSIAGNNRKLIW	TRAV6		TRAJ38	TRA
PBMC-Naive-alpha	1503	29	0.0001	TGTGTCCCATATGGAAACAAGCTGGTCTTT	CVPYGNKLVF	TRAV38-2/DV8		TRAJ47	TRA
PBMC-Naive-alpha	1504	29	0.0001	TGTGCTCTGAGTGGGGCAGCGGGCAGGAGAGCACTTACTTTT	CALSGAAGRRALTF	TRAV9-2		TRAJ5	TRA
PBMC-Naive-alpha	1505	29	0.0001	TGTGCTGTGGAGGATCTGGGTAACAATGCCAGACTCATGTTT	CAVEDLGNNARLMF	TRAV2		TRAJ31	TRA
PBMC-Naive-alpha	1506	29	0.0001	TGTGCAGCAAGCACAGGAGGCAACATGCTCACCTTT	CAASTGGNMLTF	TRAV29/DV5		TRAJ39	TRA
PBMC-Naive-alpha	1507	29	0.0001	TGTGCTGTGATTGGAGGCTCAACCCTGGGGAGGCTATACTTT	CAVIGGSTLGRLYF	TRAV21		TRAJ18	TRA
PBMC-Naive-alpha	1508	29	0.0001	TGTGCAGCAAGGGGTGCTGGTGGTACTAGCTATGGAAAGCTGACATTT	CAARGAGGTSYGKLTF	TRAV13-1		TRAJ52	TRA
PBMC-Naive-alpha	1509	29	0.0001	TGTGCTCTGACCCTATTTACTGGAGCCAATAGTAAGCTGACATTT	CALTLFTGANSKLTF	TRAV9-2		TRAJ56	TRA
PBMC-Naive-alpha	1510	29	0.0001	TGTGCTCTGAGTGAGGGCTTTGGGAATGTGCTGCATTGC	CALSEGFGNVLHC	TRAV9-2		TRAJ35	TRA
PBMC-Naive-alpha	1511	29	0.0001	TGTGCTTATAGGAACACCGGTAACCAGTTCTATTTT	CAYRNTGNQFYF	TRAV38-2/DV8		TRAJ49	TRA
PBMC-Naive-alpha	1512	29	0.0001	TGTGGCACGGATTTCACGGGAGGAGGAAACAAACTCACCTTT	CGTDFTGGGNKLTF	TRAV30		TRAJ10	TRA
PBMC-Naive-alpha	1513	29	0.0001	TGTGCCCCGGGCCCAACTGACAGCTGGGGGAAATTGCAGTTT	CAPGPTDSWGKLQF	TRAV2		TRAJ24	TRA
PBMC-Naive-alpha	1514	29	0.0001	TGCGCTGTGAGAGCCAAAAGCAGTGCTTCCAAGATAATCTTT	CAVRAKSSASKIIF	TRAV1-1		TRAJ3	TRA
PBMC-Naive-alpha	1515	29	0.0001	TGTGCTTTCATCACATATGGTGGTGCTACAAACAAGCTCATCTTT	CAFITYGGATNKLIF	TRAV38-1		TRAJ32	TRA
PBMC-Naive-alpha	1516	29	0.0001	TGCGCTGTGAGCATGGATAGCAGCTATAAATTGATCTTC	CAVSMDSSYKLIF	TRAV1-1		TRAJ12	TRA
PBMC-Naive-alpha	1517	29	0.0001	TGTGCTTACATGGTTTATAATGCAGGCAACATGCTCACCTTT	CAYMVYNAGNMLTF	TRAV38-2/DV8		TRAJ39	TRA
PBMC-Naive-alpha	1518	29	0.0001	TGTGCTGTGGAGGGCAACTTTGGAAATGAGAAATTAACCTTT	CAVEGNFGNEKLTF	TRAV36/DV7		TRAJ48	TRA
PBMC-Naive-alpha	1519	29	0.0001	TGTGCAATGAGCGCGTTAGACTCGTATTCAGGAGGAGGTGCTGACGGACTCACCTTT	CAMSALDSYSGGGADGLTF	TRAV12-3		TRAJ45	TRA
PBMC-Naive-alpha	1520	29	0.0001	TGTGCTGTGGAGGATAACTATGGTCAGAATTTTGTCTTT	CAVEDNYGQNFVF	TRAV2		TRAJ26	TRA
PBMC-Naive-alpha	1521	29	0.0001	TGTGCTGTGAGCAAGTCTGGTGGCTACAATAAGCTGATTTTT	CAVSKSGGYNKLIF	TRAV21		TRAJ4	TRA
PBMC-Naive-alpha	1522	29	0.0001	TGTGCTTATAGGACCGGCTCTAGCAACACAGGCAAACTAATCTTT	CAYRTGSSNTGKLIF	TRAV38-2/DV8		TRAJ37	TRA
PBMC-Naive-alpha	1523	29	0.0001	TGTGCTGTGTATAACAATGCCAGACTCATGTTT	CAVYNNARLMF	TRAV21		TRAJ31	TRA
PBMC-Naive-alpha	1524	29	0.0001	TGTGCTTTTTCAGGAAACACACCTCTTGTCTTT	CAFSGNTPLVF	TRAV38-2/DV8		TRAJ29	TRA
PBMC-Naive-alpha	1525	29	0.0001	TGTGCTTATAGGAGTTGGGCCAGACTCATGTTT	CAYRSWARLMF	TRAV38-2/DV8		TRAJ31	TRA
PBMC-Naive-alpha	1526	29	0.0001	TGCATCGTCAGAGCCCCCATCAGTGGCTCTAGGTTGACCTTT	CIVRAPISGSRLTF	TRAV26-1		TRAJ58	TRA
PBMC-Naive-alpha	1527	29	0.0001	TGTGCTGATCGGGGGGATAGCAGCTATAAATTGATCTTC	CADRGDSSYKLIF	TRAV21		TRAJ12	TRA
PBMC-Naive-alpha	1528	29	0.0001	TGTGTGGTGAGCGCACGTAGAGGCTCAACCCTGGGGAGGCTATACTTT	CVVSARRGSTLGRLYF	TRAV10		TRAJ18	TRA
PBMC-Naive-alpha	1529	29	0.0001	TGTGCAGCAAGTGCATATGGAAACAAACTGGTCTTT	CAASAYGNKLVF	TRAV13-1		TRAJ47	TRA
PBMC-Naive-alpha	1530	29	0.0001	TGTGCTTTCATGAAGCAGGGTAACACCGACAAGCTCATCTTT	CAFMKQGNTDKLIF	TRAV38-1		TRAJ34	TRA
PBMC-Naive-alpha	1531	29	0.0001	TGTTTAAGGCAACTGACCTTT	CLRQLTF	TRAV21		TRAJ22	TRA
PBMC-Naive-alpha	1532	29	0.0001	TGTGCTGTGGAGGATGAGGGAGGAGGAAACAAACTCACCTTT	CAVEDEGGGNKLTF	TRAV2		TRAJ10	TRA
PBMC-Naive-alpha	1533	29	0.0001	TGTGCTGTGGAGGATCCATCCGACAAGCTCATCTTT	CAVEDPSDKLIF	TRAV2		TRAJ34	TRA
PBMC-Naive-alpha	1534	29	0.0001	TGCCTCGTGGACCAACCCAACACCGGTAACCAGTTCTATTTT	CLVDQPNTGNQFYF	TRAV4		TRAJ49	TRA
PBMC-Naive-alpha	1535	29	0.0001	TGTGCTGTGATGAATTCTGGGGGTTACCAGAAAGTTACCTTT	CAVMNSGGYQKVTF	TRAV21		TRAJ13	TRA
PBMC-Naive-alpha	1536	29	0.0001	TGTGCAGCATATATCCAGGGAGGAAAGCTTATCTTC	CAAYIQGGKLIF	TRAV13-1		TRAJ23	TRA
PBMC-Naive-alpha	1537	29	0.0001	TGTGCTCACGATAATGCTGGTGGTACTAGCTATGGAAAGCTGACATTT	CAHDNAGGTSYGKLTF	TRAV9-2		TRAJ52	TRA
PBMC-Naive-alpha	1538	29	0.0001	TGTGCTTCCCTCGGAACCTACAAATACATCTTT	CASLGTYKYIF	TRAV38-2/DV8		TRAJ40	TRA
PBMC-Naive-alpha	1539	29	0.0001	TGTGCTCTGCCCCCAGGCAACACAGGCAAACTAATCTTT	CALPPGNTGKLIF	TRAV2		TRAJ37	TRA
PBMC-Naive-alpha	1540	29	0.0001	TGTGCAGCAAGTCTCTATGGGAACAACAGACTCGCTTTT	CAASLYGNNRLAF	TRAV13-1		TRAJ7	TRA
PBMC-Naive-alpha	1541	29	0.0001	TGTGCTCTGAGTGATCTAGCCTTTGGAAATGAGAAATTAACCTTT	CALSDLAFGNEKLTF	TRAV9-2		TRAJ48	TRA
PBMC-Naive-alpha	1542	29	0.0001	TGTGCTGTCGGAGGAAGCCAAGGAAATCTCATCTTT	CAVGGSQGNLIF	TRAV21		TRAJ42	TRA
PBMC-Naive-alpha	1543	29	0.0001	TGTGCTGTGCAACGATCAGGATACAGCACCCTCACCTTT	CAVQRSGYSTLTF	TRAV2		TRAJ11	TRA
PBMC-Naive-alpha	1544	29	0.0001	TGTGCTGCACCAGGGGACACCGGTAACCAGTTCTATTTT	CAAPGDTGNQFYF	TRAV21		TRAJ49	TRA
PBMC-Naive-alpha	1545	29	0.0001	TGTGCTGGTCGGAACAACTTCAACAAATTTTACTTT	CAGRNNFNKFYF	TRAV22		TRAJ21	TRA
PBMC-Naive-alpha	1546	29	0.0001	TGTGCTGTGAGGAATTATGGTGGTGCTACAAACAAGCTCATCTTT	CAVRNYGGATNKLIF	TRAV8-6		TRAJ32	TRA
PBMC-Naive-alpha	1547	29	0.0001	TGTGCAATGCCCTCTGGGGGAGGAGGAAACAAACTCACCTTT	CAMPSGGGGNKLTF	TRAV12-3		TRAJ10	TRA
PBMC-Naive-alpha	1548	29	0.0001	TGTGCTGTGAGAGAAGCAGGCAAATCAACCTTT	CAVREAGKSTF	TRAV21		TRAJ27	TRA
PBMC-Naive-alpha	1549	29	0.0001	TGTGCTGGGCGAAAGACTGGCAACACAGGCAAACTAATCTTT	CAGRKTGNTGKLIF	TRAV35		TRAJ37	TRA
PBMC-Naive-alpha	1550	29	0.0001	TGTGCAATTTTTAATGCAGGCAACATGCTCACCTTT	CAIFNAGNMLTF	TRAV12-3		TRAJ39	TRA
PBMC-Naive-alpha	1551	29	0.0001	TGTGCAGAGAGTAATACTGGAGGCTTCAAAACTATCTTT	CAESNTGGFKTIF	TRAV5		TRAJ9	TRA
PBMC-Naive-alpha	1552	29	0.0001	TGTGCTGTGTGGTTAGGTAGCAACTATAAACTGACATTT	CAVWLGSNYKLTF	TRAV21		TRAJ53	TRA
PBMC-Naive-alpha	1553	29	0.0001	TGCCTCGTGGGGAGGGATAGCAACTATCAGTTAATCTGG	CLVGRDSNYQLIW	TRAV4		TRAJ33	TRA
PBMC-Naive-alpha	1554	29	0.0001	TGTGCTTTCATGAAATATAACGACTACAAGCTCAGCTTT	CAFMKYNDYKLSF	TRAV38-1		TRAJ20	TRA
PBMC-Naive-alpha	1555	29	0.0001	TGCCTCGTGGGTGGGTATGGCCAGAAGCTGCTCTTT	CLVGGYGQKLLF	TRAV4		TRAJ16	TRA
PBMC-Naive-alpha	1556	29	0.0001	TGTGCTTTCATGAGGACCAACTATGGTCAGAATTTTGTCTTT	CAFMRTNYGQNFVF	TRAV38-1		TRAJ26	TRA
PBMC-Naive-alpha	1557	29	0.0001	TGTGCAGCAAGCGCGCTTCACAACCTCTTCTTT	CAASALHNLFF	TRAV29/DV5		TRAJ36	TRA
PBMC-Naive-alpha	1558	29	0.0001	TGTGCTTATAGGGTCAGAGATGACAAGATCATCTTT	CAYRVRDDKIIF	TRAV38-2/DV8		TRAJ30	TRA
PBMC-Naive-alpha	1559	29	0.0001	TGCATCGTCAGAGCAAGGACCGGCACTGCCAGTAAACTCACCTTT	CIVRARTGTASKLTF	TRAV26-1		TRAJ44	TRA
PBMC-Naive-alpha	1560	29	0.0001	TGTGCTTATTTGAATAACAATGCCAGACTCATGTTT	CAYLNNNARLMF	TRAV38-2/DV8		TRAJ31	TRA
PBMC-Naive-alpha	1561	29	0.0001	TGTGCTGTGAGGCCCACTGCCAGTAAACTCACCTTT	CAVRPTASKLTF	TRAV21		TRAJ44	TRA
PBMC-Naive-alpha	1562	29	0.0001	TGCGCCTTCAATGCCAGACTCATGTTT	CAFNARLMF	TRAV1-1		TRAJ31	TRA
PBMC-Naive-alpha	1563	29	0.0001	TGTGCAGCAAGTTACTCTGGGGCTGGGAGTTACCAACTCACTTTC	CAASYSGAGSYQLTF	TRAV29/DV5		TRAJ28	TRA
PBMC-Naive-alpha	1564	29	0.0001	TGTGCTGTGACTAACGACTACAAGCTCAGCTTT	CAVTNDYKLSF	TRAV21		TRAJ20	TRA
PBMC-Naive-alpha	1565	29	0.0001	TGTGCTGTCTACGTTTCAGGATACAGCACCCTCACCTTT	CAVYVSGYSTLTF	TRAV21		TRAJ11	TRA
PBMC-Naive-alpha	1566	29	0.0001	TGTGCTGTATGGGGGGATAGCAGCTATAAATTGATCTTC	CAVWGDSSYKLIF	TRAV21		TRAJ12	TRA
PBMC-Naive-alpha	1567	29	0.0001	TGTGCTGTGCCGGATAACTATGGTCAGAATTTTGTCTTT	CAVPDNYGQNFVF	TRAV21		TRAJ26	TRA
PBMC-Naive-alpha	1568	29	0.0001	TGTGCTCTGAGCCCTTTTGGGGCTGGGAGTTACCAACTCACTTTC	CALSPFGAGSYQLTF	TRAV9-2		TRAJ28	TRA
PBMC-Naive-alpha	1569	29	0.0001	TGTGCAGCAAGCGCGACCGGCACTGCCAGTAAACTCACCTTT	CAASATGTASKLTF	TRAV29/DV5		TRAJ44	TRA
PBMC-Naive-alpha	1570	29	0.0001	TGTGCTCTGGATGCTGGTGGTACTAGCTATGGAAAGCTGACATTT	CALDAGGTSYGKLTF	TRAV9-2		TRAJ52	TRA
PBMC-Naive-alpha	1571	29	0.0001	TGTGCTGTGAGGTTTACCAACGACTACAAGCTCAGCTTT	CAVRFTNDYKLSF	TRAV21		TRAJ20	TRA
PBMC-Naive-alpha	1572	29	0.0001	TGTGCTGTGATGGGGGATAGCAACTATCAGTTAATCTGG	CAVMGDSNYQLIW	TRAV21		TRAJ33	TRA
PBMC-Naive-alpha	1573	29	0.0001	TGTGTGCTTTCCGAAGGCCCAGTGGATAGCAGCTATAAATTGATCTTC	CVLSEGPVDSSYKLIF	TRAV10		TRAJ12	TRA
PBMC-Naive-alpha	1574	29	0.0001	TGTGCTCTTTATCAAACTGGGGCAAACAACCTCTTCTTT	CALYQTGANNLFF	TRAV19		TRAJ36	TRA
PBMC-Naive-alpha	1575	29	0.0001	TGTGCTTTCATGAAGTACAATAACAATGACATGCGCTTT	CAFMKYNNNDMRF	TRAV38-1		TRAJ43	TRA
PBMC-Naive-alpha	1576	29	0.0001	TGTGCAGAGAGTATAGGGGGAAGCTACATACCTACATTT	CAESIGGSYIPTF	TRAV5		TRAJ6	TRA
PBMC-Naive-alpha	1577	29	0.0001	TGTGCTGTGGAGGATGGGGGTTCGGGTGGTGCTACAAACAAGCTCATCTTT	CAVEDGGSGGATNKLIF	TRAV2		TRAJ32	TRA
PBMC-Naive-alpha	1578	29	0.0001	TGTGCTCTGACCAACAATGCCAGACTCATGTTT	CALTNNARLMF	TRAV9-2		TRAJ31	TRA
PBMC-Naive-alpha	1579	29	0.0001	TGTGCTGTGTATACCAATGCAGGCAAATCAACCTTT	CAVYTNAGKSTF	TRAV21		TRAJ27	TRA
PBMC-Naive-alpha	1580	29	0.0001	TGTGCAAGGGGGGAGAATAATGCAGGCAACATGCTCACCTTT	CARGENNAGNMLTF	TRAV25		TRAJ39	TRA
PBMC-Naive-alpha	1581	29	0.0001	TGTGCAGCAGAGAGAGGAGGAGGTGCTGACGGACTCACCTTT	CAAERGGGADGLTF	TRAV13-1		TRAJ45	TRA
PBMC-Naive-alpha	1582	29	0.0001	TGTGCTCTGAGTGGAAGTGATTACCAGAAAGTTACCTTT	CALSGSDYQKVTF	TRAV9-2		TRAJ13	TRA
PBMC-Naive-alpha	1583	29	0.0001	TGCGCTGCGAACCAGGCAGGAACTGCTCTGATCTTT	CAANQAGTALIF	TRAV1-1		TRAJ15	TRA
PBMC-Naive-alpha	1584	29	0.0001	TGTGCTCTGGGACCCCCTAACACCGACAAGCTCATCTTT	CALGPPNTDKLIF	TRAV9-2		TRAJ34	TRA
PBMC-Naive-alpha	1585	29	0.0001	TGTGCTCTGAGTGATCGGATGGGAGGAGGAAACAAACTCACCTTT	CALSDRMGGGNKLTF	TRAV9-2		TRAJ10	TRA
PBMC-Naive-alpha	1586	29	0.0001	TGTGCTGTGGAGGATCGAGGATACAGCACCCTCACCTTT	CAVEDRGYSTLTF	TRAV2		TRAJ11	TRA
PBMC-Naive-alpha	1587	29	0.0001	TGTGCTCTGAGTGATCGTGGAGGAGGAAACAAACTCACCTTT	CALSDRGGGNKLTF	TRAV9-2		TRAJ10	TRA
PBMC-Naive-alpha	1588	29	0.0001	TGTGCTGTGAGCTCGTACAATAACAATGACATGCGCTTT	CAVSSYNNNDMRF	TRAV21		TRAJ43	TRA
PBMC-Naive-alpha	1589	29	0.0001	TGTGCTCTGAGTGACTCTAGCAACACAGGCAAACTAATCTTT	CALSDSSNTGKLIF	TRAV9-2		TRAJ37	TRA
PBMC-Naive-alpha	1590	29	0.0001	TGTGCAGCAAGTACTGGAGGCTTCAAAACTATCTTT	CAASTGGFKTIF	TRAV13-1		TRAJ9	TRA
PBMC-Naive-alpha	1591	29	0.0001	TGTGGCACAGAGAAATGGAACACCGGTAACCAGTTCTATTTT	CGTEKWNTGNQFYF	TRAV30		TRAJ49	TRA
PBMC-Naive-alpha	1592	29	0.0001	TGTGTGGTCCCTCAGGCAGGAACTGCTCTGATCTTT	CVVPQAGTALIF	TRAV10		TRAJ15	TRA
PBMC-Naive-alpha	1593	29	0.0001	TGTGCAGCAAGGTACAGCACCCTCACCTTT	CAARYSTLTF	TRAV13-1		TRAJ11	TRA
PBMC-Naive-alpha	1594	29	0.0001	TGTGCTGTGCGCTCGGTAAAGGGAGCCCAGAAGCTGGTATTT	CAVRSVKGAQKLVF	TRAV36/DV7		TRAJ54	TRA
PBMC-Naive-alpha	1595	29	0.0001	TGTGCCGTGAACACGATGGATAGCAGCTATAAATTGATCTTC	CAVNTMDSSYKLIF	TRAV12-2		TRAJ12	TRA
PBMC-Naive-alpha	1596	29	0.0001	TGTGCTCGGGTGGGGCGCTTT	CARVGRF	TRAV38-2/DV8		TRAJ43	TRA
PBMC-Naive-alpha	1597	29	0.0001	TGTGCTACGGTCACTGGAGGCTTCAAAACTATCTTT	CATVTGGFKTIF	TRAV17		TRAJ9	TRA
PBMC-Naive-alpha	1598	29	0.0001	TGTGCCGTGGACGCCCTCTATACCGGCACTGCCAGTAAACTCACCTTT	CAVDALYTGTASKLTF	TRAV39		TRAJ44	TRA
PBMC-Naive-alpha	1599	29	0.0001	TGTGCTCTGACTAATTCAGGAAACACACCTCTTGTCTTT	CALTNSGNTPLVF	TRAV9-2		TRAJ29	TRA
PBMC-Naive-alpha	1600	29	0.0001	TGTGCTGTGTATCGGAGAGATGACAAGATCATCTTT	CAVYRRDDKIIF	TRAV2		TRAJ30	TRA
PBMC-Naive-alpha	1601	29	0.0001	TGTGGCACAGAGAGGGGGGCTGGGAGTTACCAACTCACTTTC	CGTERGAGSYQLTF	TRAV30		TRAJ28	TRA
PBMC-Naive-alpha	1602	29	0.0001	TGCGCTCCCCGGATGGATAGCAGCTATAAATTGATCTTC	CAPRMDSSYKLIF	TRAV1-1		TRAJ12	TRA
PBMC-Naive-alpha	1603	29	0.0001	TGCATCGTCAGAGCCCGGGGAGGAAGCTACATACCTACATTT	CIVRARGGSYIPTF	TRAV26-1		TRAJ6	TRA
PBMC-Naive-alpha	1604	29	0.0001	TGTGCTGTGAGGCACAGAGATGACAAGATCATCTTT	CAVRHRDDKIIF	TRAV21		TRAJ30	TRA
PBMC-Naive-alpha	1605	29	0.0001	TGTGCTGTGGACAACCAGGCAGGAACTGCTCTGATCTTT	CAVDNQAGTALIF	TRAV21		TRAJ15	TRA
PBMC-Naive-alpha	1606	29	0.0001	TGTGCAGCAAAAGATTCAGGAAACACACCTCTTGTCTTT	CAAKDSGNTPLVF	TRAV13-1		TRAJ29	TRA
PBMC-Naive-alpha	1607	29	0.0001	TGTGCTGTCAGATCCGGTAACAATGCCAGACTCATGTTT	CAVRSGNNARLMF	TRAV41		TRAJ31	TRA
PBMC-Naive-alpha	1608	29	0.0001	TGTGCCGTGAACACCGGCCGAGATTCCGGGTATGCACTCAACTTC	CAVNTGRDSGYALNF	TRAV12-2		TRAJ41	TRA
PBMC-Naive-alpha	1609	29	0.0001	TGCCTCGTGGGTGCTGGGGATAGCAGCTATAAATTGATCTTC	CLVGAGDSSYKLIF	TRAV4		TRAJ12	TRA
PBMC-Naive-alpha	1610	29	0.0001	TGTGCTTATAGGATTCAGGGCGGATCTGAAAAGCTGGTCTTT	CAYRIQGGSEKLVF	TRAV38-2/DV8		TRAJ57	TRA
PBMC-Naive-alpha	1611	29	0.0001	TGTGCTTATTCAGAGAATAACAATGCCAGACTCATGTTT	CAYSENNNARLMF	TRAV38-2/DV8		TRAJ31	TRA
PBMC-Naive-alpha	1612	29	0.0001	TGTGCAGCAAGGTCTTCTGGTTCTGCAAGGCAACTGACCTTT	CAARSSGSARQLTF	TRAV13-1		TRAJ22	TRA
PBMC-Naive-alpha	1613	29	0.0001	TGTGCTGTGAATAGTGGAGGTAGCAACTATAAACTGACATTT	CAVNSGGSNYKLTF	TRAV36/DV7		TRAJ53	TRA
PBMC-Naive-alpha	1614	29	0.0001	TGTGCAGCAAGCAAATATGGAAACAAGCTGGTCTTT	CAASKYGNKLVF	TRAV29/DV5		TRAJ47	TRA
PBMC-Naive-alpha	1615	28	0.0001	TGTGCTGTGGTCCCCATGGAATATGGAAACAAGCTGGTCTTT	CAVVPMEYGNKLVF	TRAV21		TRAJ47	TRA
PBMC-Naive-alpha	1616	28	0.0001	TGTGCTGTGCGAGCAGCTGGGGCTGGGAGTTACCAACTCACTTTC	CAVRAAGAGSYQLTF	TRAV21		TRAJ28	TRA
PBMC-Naive-alpha	1617	28	0.0001	TGTGCTCTGAGTGATGCATACAACTTCAACAAATTTTACTTT	CALSDAYNFNKFYF	TRAV9-2		TRAJ21	TRA
PBMC-Naive-alpha	1618	28	0.0001	TGTGCTCCACTAAACTCTGGGGCTGGGAGTTACCAACTCACTTTC	CAPLNSGAGSYQLTF	TRAV38-1		TRAJ28	TRA
PBMC-Naive-alpha	1619	28	0.0001	TGTGCTCGCGCGGGGGTGGATAGCAGCTATAAATTGATCTTC	CARAGVDSSYKLIF	TRAV13-1		TRAJ12	TRA
PBMC-Naive-alpha	1620	28	0.0001	TGTGCTTATAGGAGCCTTAACGACTACAAGCTCAGCTTT	CAYRSLNDYKLSF	TRAV38-2/DV8		TRAJ20	TRA
PBMC-Naive-alpha	1621	28	0.0001	TGTGGCACCTGGAACACCGGTAACCAGTTCTATTTT	CGTWNTGNQFYF	TRAV30		TRAJ49	TRA
PBMC-Naive-alpha	1622	28	0.0001	TGTGCAATGAGCGGGACGGGAACCTACAAATACATCTTT	CAMSGTGTYKYIF	TRAV12-3		TRAJ40	TRA
PBMC-Naive-alpha	1623	28	0.0001	TGTGCTGTGGGGAACAACAGACTCGCTTTT	CAVGNNRLAF	TRAV21		TRAJ7	TRA
PBMC-Naive-alpha	1624	28	0.0001	TGTGCTCTGTATAGTGGAGGTAGCAACTATAAACTGACATTT	CALYSGGSNYKLTF	TRAV9-2		TRAJ53	TRA
PBMC-Naive-alpha	1625	28	0.0001	TGTGCCCGAGAAACCAGTGGCTCTAGGTTGACCTTT	CARETSGSRLTF	TRAV41		TRAJ58	TRA
PBMC-Naive-alpha	1626	28	0.0001	TGTGCTTTCATGAGAGATAATGCAGGCAACATGCTCACCTTT	CAFMRDNAGNMLTF	TRAV38-1		TRAJ39	TRA
PBMC-Naive-alpha	1627	28	0.0001	TGTGCAATGGAGGCTGGTTCTGCAAGGCAACTGACCTTT	CAMEAGSARQLTF	TRAV12-3		TRAJ22	TRA
PBMC-Naive-alpha	1628	28	0.0001	TGTGTGGTGAGCGGGTACGGCGGCACTGCCAGTAAACTCACCTTT	CVVSGYGGTASKLTF	TRAV10		TRAJ44	TRA
PBMC-Naive-alpha	1629	28	0.0001	TGTGTGGTGAGCGCGAAGATAGGCTTTGGGAATGTGCTGCATTGC	CVVSAKIGFGNVLHC	TRAV10		TRAJ35	TRA
PBMC-Naive-alpha	1630	28	0.0001	TGTGCAGCAAGTACCCCATCAGGAGGAAGCTACATACCTACATTT	CAASTPSGGSYIPTF	TRAV13-1		TRAJ6	TRA
PBMC-Naive-alpha	1631	28	0.0001	TGTGCTACGGACGACGCTGGTGGTACTAGCTATGGAAAGCTGACATTT	CATDDAGGTSYGKLTF	TRAV17		TRAJ52	TRA
PBMC-Naive-alpha	1632	28	0.0001	TGTGCAATGAGAGAGCGGGACGGCACTGCCAGTAAACTCACCTTT	CAMRERDGTASKLTF	TRAV14/DV4		TRAJ44	TRA
PBMC-Naive-alpha	1633	28	0.0001	TGTGCTTATAGGATTGACCTTAACAATGCCAGACTCATGTTT	CAYRIDLNNARLMF	TRAV38-2/DV8		TRAJ31	TRA
PBMC-Naive-alpha	1634	28	0.0001	TGTGCTCTGAGTGACAGCAGAGATGACAAGATCATCTTT	CALSDSRDDKIIF	TRAV9-2		TRAJ30	TRA
PBMC-Naive-alpha	1635	28	0.0001	TGTGCTGTCCTTGATAGCAACTATCAGTTAATCTGG	CAVLDSNYQLIW	TRAV1-2		TRAJ33	TRA
PBMC-Naive-alpha	1636	28	0.0001	TGCGCTGTGAAACCCTCCGGTTCTGCAAGGCAACTGACCTTT	CAVKPSGSARQLTF	TRAV1-1		TRAJ22	TRA
PBMC-Naive-alpha	1637	28	0.0001	TGTGCTGTGAGCAGCTCTAGCAACACAGGCAAACTAATCTTT	CAVSSSSNTGKLIF	TRAV21		TRAJ37	TRA
PBMC-Naive-alpha	1638	28	0.0001	TGTGCAGAGAACAGAGATGACAAGATCATCTTT	CAENRDDKIIF	TRAV13-2		TRAJ30	TRA
PBMC-Naive-alpha	1639	28	0.0001	TGTGCTGGGCATGATTGGGGTAGCAACTATAAACTGACATTT	CAGHDWGSNYKLTF	TRAV35		TRAJ53	TRA
PBMC-Naive-alpha	1640	28	0.0001	TGTGCTGTACAAACCGGCACTGCCAGTAAACTCACCTTT	CAVQTGTASKLTF	TRAV21		TRAJ44	TRA
PBMC-Naive-alpha	1641	28	0.0001	TGTGCTGTCTTCAATGCAGGCAAATCAACCTTT	CAVFNAGKSTF	TRAV21		TRAJ27	TRA
PBMC-Naive-alpha	1642	28	0.0001	TGTGCTGTGATAAACACAGGCTTTCAGAAACTTGTATTT	CAVINTGFQKLVF	TRAV21		TRAJ8	TRA
PBMC-Naive-alpha	1643	28	0.0001	TGTGCTGTGCAATTGGACACCGGTAACCAGTTCTATTTT	CAVQLDTGNQFYF	TRAV20		TRAJ49	TRA
PBMC-Naive-alpha	1644	28	0.0001	TGTGCTCTGAGTGAAAGTCAGGGAGCCCAGAAGCTGGTATTT	CALSESQGAQKLVF	TRAV9-2		TRAJ54	TRA
PBMC-Naive-alpha	1645	28	0.0001	TGTGCTCTAAGCCAGGGAGGAAAGCTTATCTTC	CALSQGGKLIF	TRAV6		TRAJ23	TRA
PBMC-Naive-alpha	1646	28	0.0001	TGTGCAGAGAGGGACCAGGCAGGAACTGCTCTGATCTTT	CAERDQAGTALIF	TRAV13-2		TRAJ15	TRA
PBMC-Naive-alpha	1647	28	0.0001	TGTGCAGCAATCCTGTACAGCAGTGCTTCCAAGATAATCTTT	CAAILYSSASKIIF	TRAV13-1		TRAJ3	TRA
PBMC-Naive-alpha	1648	28	0.0001	TGTGCTCTGAGTGATCAATGGGGAAAGCTTATCTTC	CALSDQWGKLIF	TRAV9-2		TRAJ23	TRA
PBMC-Naive-alpha	1649	28	0.0001	TGTGCTTTTATGGATAGCAACTATCAGTTAATCTGG	CAFMDSNYQLIW	TRAV38-2/DV8		TRAJ33	TRA
PBMC-Naive-alpha	1650	28	0.0001	TGTGCTGTGAAAACTGGAGCCAATAGTAAGCTGACATTT	CAVKTGANSKLTF	TRAV21		TRAJ56	TRA
PBMC-Naive-alpha	1651	28	0.0001	TGTGCTGTGAGGATTCCTGACAGCTGGGGGAAATTGCAGTTT	CAVRIPDSWGKLQF	TRAV21		TRAJ24	TRA
PBMC-Naive-alpha	1652	28	0.0001	TGCCTCGTGGGTGAAGGTGGCCAGAAGCTGCTCTTT	CLVGEGGQKLLF	TRAV4		TRAJ16	TRA
PBMC-Naive-alpha	1653	28	0.0001	TGTGCTGCCGTCTCTGGCAACACAGGCAAACTAATCTTT	CAAVSGNTGKLIF	TRAV21		TRAJ37	TRA
PBMC-Naive-alpha	1654	28	0.0001	TGTGCTGTGAGGCCCGGCTCTGGCAACACAGGCAAACTAATCTTT	CAVRPGSGNTGKLIF	TRAV21		TRAJ37	TRA
PBMC-Naive-alpha	1655	28	0.0001	TGTGCTTGTATAGGAACCTACAAATACATCTTT	CACIGTYKYIF	TRAV38-2/DV8		TRAJ40	TRA
PBMC-Naive-alpha	1656	28	0.0001	TGCCTCGTGGGCGCATACTCTGGGGCTGGGAGTTACCAACTCACTTTC	CLVGAYSGAGSYQLTF	TRAV4		TRAJ28	TRA
PBMC-Naive-alpha	1657	28	0.0001	TGTGCAGCAAACTGGTACACCAATGCAGGCAAATCAACCTTT	CAANWYTNAGKSTF	TRAV13-1		TRAJ27	TRA
PBMC-Naive-alpha	1658	28	0.0001	TGCATCGTGGATAACTATGGTCAGAATTTTGTCTTT	CIVDNYGQNFVF	TRAV26-1		TRAJ26	TRA
PBMC-Naive-alpha	1659	28	0.0001	TGTGCTCTGAGTGTGCGCGGGAGTTCTGCAAGGCAACTGACCTTT	CALSVRGSSARQLTF	TRAV9-2		TRAJ22	TRA
PBMC-Naive-alpha	1660	28	0.0001	TGTGCAGCCCATGAAACTGGCTACAATAAGCTGATTTTT	CAAHETGYNKLIF	TRAV13-1		TRAJ4	TRA
PBMC-Naive-alpha	1661	28	0.0001	TGTGCAGGAGCAGAAGATAACACCGACAAGCTCATCTTT	CAGAEDNTDKLIF	TRAV27		TRAJ34	TRA
PBMC-Naive-alpha	1662	28	0.0001	TGTGCCGTGAATCCCAGCAGTGCTTCCAAGATAATCTTT	CAVNPSSASKIIF	TRAV12-2		TRAJ3	TRA
PBMC-Naive-alpha	1663	28	0.0001	TGTGCTGTGGAGTCAGGAGGAAGCTACATACCTACATTT	CAVESGGSYIPTF	TRAV22		TRAJ6	TRA
PBMC-Naive-alpha	1664	28	0.0001	TGTGCTTATAGGAGCGCCGACAATACTGGAGCCAATAGTAAGCTGACATTT	CAYRSADNTGANSKLTF	TRAV38-2/DV8		TRAJ56	TRA
PBMC-Naive-alpha	1665	28	0.0001	TGTGCTCTGAGTGATCCTGACGGATCTGAAAAGCTGGTCTTT	CALSDPDGSEKLVF	TRAV9-2		TRAJ57	TRA
PBMC-Naive-alpha	1666	28	0.0001	TGTGCTCTGAGTGATTCAGGAGGAGGTGCTGACGGACTCACCTTT	CALSDSGGGADGLTF	TRAV9-2		TRAJ45	TRA
PBMC-Naive-alpha	1667	28	0.0001	TGTGCTCTGCACTCCAATACTGGAGGCTTCAAAACTATCTTT	CALHSNTGGFKTIF	TRAV9-2		TRAJ9	TRA
PBMC-Naive-alpha	1668	28	0.0001	TGTGTGGTGAACCCGATGGATAGCAGCTATAAATTGATCTTC	CVVNPMDSSYKLIF	TRAV12-1		TRAJ12	TRA
PBMC-Naive-alpha	1669	28	0.0001	TGTGCTTTCATCCGAACCTACAAATACATCTTT	CAFIRTYKYIF	TRAV38-1		TRAJ40	TRA
PBMC-Naive-alpha	1670	28	0.0001	TGTGTGGTGAGCGAGAACCAGGCAGGAACTGCTCTGATCTTT	CVVSENQAGTALIF	TRAV10		TRAJ15	TRA
PBMC-Naive-alpha	1671	28	0.0001	TGTGCTGTGAGGCGCGATCCCTATTCAGGAGGAGGTGCTGACGGACTCACCTTT	CAVRRDPYSGGGADGLTF	TRAV21		TRAJ45	TRA
PBMC-Naive-alpha	1672	28	0.0001	TGTGCTGTGACGAAGAACAACAGACTCGCTTTT	CAVTKNNRLAF	TRAV21		TRAJ7	TRA
PBMC-Naive-alpha	1673	28	0.0001	TGTGCAATGAGATCGTTTTCAGGAAACACACCTCTTGTCTTT	CAMRSFSGNTPLVF	TRAV14/DV4		TRAJ29	TRA
PBMC-Naive-alpha	1674	28	0.0001	TGTGCTTCCTATAATGCAGGCAACATGCTCACCTTT	CASYNAGNMLTF	TRAV38-1		TRAJ39	TRA
PBMC-Naive-alpha	1675	28	0.0001	TGTGCTGTGAGAGACGCCCCCCGCAAGCTCAGCTTT	CAVRDAPRKLSF	TRAV3		TRAJ20	TRA
PBMC-Naive-alpha	1676	28	0.0001	TGTGCAGCAAGCGGCTCATGGGGTAACAATGCCAGACTCATGTTT	CAASGSWGNNARLMF	TRAV29/DV5		TRAJ31	TRA
PBMC-Naive-alpha	1677	28	0.0001	TGTGCAGCAAGTAAAGCCGACAAGCTCATCTTT	CAASKADKLIF	TRAV13-1		TRAJ34	TRA
PBMC-Naive-alpha	1678	28	0.0001	TGTGCAGCAAGTATCAACGACTACAAGCTCAGCTTT	CAASINDYKLSF	TRAV13-1		TRAJ20	TRA
PBMC-Naive-alpha	1679	28	0.0001	TGTGCTTTCATGCCCAGAGCTAACGACTACAAGCTCAGCTTT	CAFMPRANDYKLSF	TRAV38-1		TRAJ20	TRA
PBMC-Naive-alpha	1680	28	0.0001	TGTGCAGCATTGGGATCTGGTTCTGCAAGGCAACTGACCTTT	CAALGSGSARQLTF	TRAV29/DV5		TRAJ22	TRA
PBMC-Naive-alpha	1681	28	0.0001	TGCGCTGTGAGAGATCACACGGGCAGGAGAGCACTTACTTTT	CAVRDHTGRRALTF	TRAV1-1		TRAJ5	TRA
PBMC-Naive-alpha	1682	28	0.0001	TGTGCTGTGAGGGAAACCAGTGGCTCTAGGTTGACCTTT	CAVRETSGSRLTF	TRAV21		TRAJ58	TRA
PBMC-Naive-alpha	1683	28	0.0001	TGTGCAGGAGCTAATGCTGGTGGTACTAGCTATGGAAAGCTGACATTT	CAGANAGGTSYGKLTF	TRAV27		TRAJ52	TRA
PBMC-Naive-alpha	1684	28	0.0001	TGTGCTGTGCCTTCTGGTTCTGCAAGGCAACTGACCTTT	CAVPSGSARQLTF	TRAV2		TRAJ22	TRA
PBMC-Naive-alpha	1685	28	0.0001	TGTGCTGTGAGTCATGACAGCTGGGGGAAATTGCAGTTT	CAVSHDSWGKLQF	TRAV21		TRAJ24	TRA
PBMC-Naive-alpha	1686	28	0.0001	TGTGCAGCATTTGACGAAGCTGCAGGCAACAAGCTAACTTTT	CAAFDEAAGNKLTF	TRAV13-1		TRAJ17	TRA
PBMC-Naive-alpha	1687	28	0.0001	TGTGCTGGGGGGAGCAACTATCAGTTAATCTGG	CAGGSNYQLIW	TRAV2		TRAJ33	TRA
PBMC-Naive-alpha	1688	28	0.0001	TGTGCTTTCACCCGGGGAGCCCAGAAGCTGGTATTT	CAFTRGAQKLVF	TRAV9-2		TRAJ54	TRA
PBMC-Naive-alpha	1689	28	0.0001	TGTGCTCGTGGAGGGGGAAGCCAAGGAAATCTCATCTTT	CARGGGSQGNLIF	TRAV9-2		TRAJ42	TRA
PBMC-Naive-alpha	1690	28	0.0001	TGTGCTTACTCGAAGGAATATGGAAACAAACTGGTCTTT	CAYSKEYGNKLVF	TRAV38-2/DV8		TRAJ47	TRA
PBMC-Naive-alpha	1691	28	0.0001	TGTGGCACAGAGGAGGACTTTGGAAATGAGAAATTAACCTTT	CGTEEDFGNEKLTF	TRAV30		TRAJ48	TRA
PBMC-Naive-alpha	1692	28	0.0001	TGTGCTCCCCCCACGGGCAGGAGAGCACTTACTTTT	CAPPTGRRALTF	TRAV21		TRAJ5	TRA
PBMC-Naive-alpha	1693	28	0.0001	TGTGCAGCTCCAACCACAGGCTTTCAGAAACTTGTATTT	CAAPTTGFQKLVF	TRAV13-1		TRAJ8	TRA
PBMC-Naive-alpha	1694	28	0.0001	TGTGCTGTGACTACGCTTTCAGATGGCCAGAAGCTGCTCTTT	CAVTTLSDGQKLLF	TRAV21		TRAJ16	TRA
PBMC-Naive-alpha	1695	28	0.0001	TGTGCTCCGAAAGTCCCCCCAGGAGGAAGCTACATACCTACATTT	CAPKVPPGGSYIPTF	TRAV21		TRAJ6	TRA
PBMC-Naive-alpha	1696	28	0.0001	TGTGCAGGGCTAGATGCCAGACTCATGTTT	CAGLDARLMF	TRAV25		TRAJ31	TRA
PBMC-Naive-alpha	1697	28	0.0001	TGTGCAGCAAGTATTTGGGGAAACAAACTCACCTTT	CAASIWGNKLTF	TRAV13-1		TRAJ10	TRA
PBMC-Naive-alpha	1698	28	0.0001	TGTGCTCCGAGGGGTTCTGCAAGGCAACTGACCTTT	CAPRGSARQLTF	TRAV5		TRAJ22	TRA
PBMC-Naive-alpha	1699	28	0.0001	TGTGCTTTCACTGACCATTCAGGAGGAGGTGCTGACGGACTCACCTTT	CAFTDHSGGGADGLTF	TRAV38-1		TRAJ45	TRA
PBMC-Naive-alpha	1700	28	0.0001	TGCCTCGTGGGTGACCCCTCTGACATGCGCTTT	CLVGDPSDMRF	TRAV4		TRAJ43	TRA
PBMC-Naive-alpha	1701	28	0.0001	TGTGCTGGGCAGAGAACCTCCTACGACAAGGTGATATTT	CAGQRTSYDKVIF	TRAV35		TRAJ50	TRA
PBMC-Naive-alpha	1702	28	0.0001	TGTGCAGAGAAGGGAAATGAGAAATTAACCTTT	CAEKGNEKLTF	TRAV5		TRAJ48	TRA
PBMC-Naive-alpha	1703	28	0.0001	TGTGCTCTGAGTGATCGGGCAGGTGGTCAGAATTTTGTCTTT	CALSDRAGGQNFVF	TRAV9-2		TRAJ26	TRA
PBMC-Naive-alpha	1704	28	0.0001	TGTGCAGGTCTTACTAACTTTGGAAATGAGAAATTAACCTTT	CAGLTNFGNEKLTF	TRAV25		TRAJ48	TRA
PBMC-Naive-alpha	1705	28	0.0001	TGTGCTTTCTCAACCCGAGCAGCCAATAGTAAGCTGACATTT	CAFSTRAANSKLTF	TRAV38-1		TRAJ56	TRA
PBMC-Naive-alpha	1706	28	0.0001	TGTGTGGTGAGCGGGTCAGGAAACACACCTCTTGTCTTT	CVVSGSGNTPLVF	TRAV10		TRAJ29	TRA
PBMC-Naive-alpha	1707	28	0.0001	TGTGCTGTGAGTAGAACTTCTAACGACTACAAGCTCAGCTTT	CAVSRTSNDYKLSF	TRAV21		TRAJ20	TRA
PBMC-Naive-alpha	1708	28	0.0001	TGTGCTGCGAAAACCTCGGGAGCCCAGAAGCTGGTATTT	CAAKTSGAQKLVF	TRAV21		TRAJ54	TRA
PBMC-Naive-alpha	1709	28	0.0001	TGTGCTTATAATAAGGGCGGATCTGAAAAGCTGGTCTTT	CAYNKGGSEKLVF	TRAV38-2/DV8		TRAJ57	TRA
PBMC-Naive-alpha	1710	28	0.0001	TGTGCCCTCCCTGGTGGCTACAATAAGCTGATTTTT	CALPGGYNKLIF	TRAV13-1		TRAJ4	TRA
PBMC-Naive-alpha	1711	28	0.0001	TGTGCAGCAAGTAAAAATGCAGGCAACATGCTCACCTTT	CAASKNAGNMLTF	TRAV13-1		TRAJ39	TRA
PBMC-Naive-alpha	1712	28	0.0001	TGTGCTCTGAGTGGAGGCTTTGGGAATGTGCTGCATTGC	CALSGGFGNVLHC	TRAV9-2		TRAJ35	TRA
PBMC-Naive-alpha	1713	28	0.0001	TGTGCAGCAAGTGGTGGCTACAATAAGCTGATTTTT	CAASGGYNKLIF	TRAV13-1		TRAJ4	TRA
PBMC-Naive-alpha	1714	28	0.0001	TGTGCTGTGAGACACGCAGGCAACATGCTCACCTTT	CAVRHAGNMLTF	TRAV21		TRAJ39	TRA
PBMC-Naive-alpha	1715	28	0.0001	TGTGCTCTGAGCGGTCAGGGAGCCCAGAAGCTGGTATTT	CALSGQGAQKLVF	TRAV9-2		TRAJ54	TRA
PBMC-Naive-alpha	1716	28	0.0001	TGTGCTGTGGGGTGTCGCCGGATGGATAGCAGCTATAAATTGATCTTC	CAVGCRRMDSSYKLIF	TRAV36/DV7		TRAJ12	TRA
PBMC-Naive-alpha	1717	28	0.0001	TGTGCTTATAACACCAATGCAGGCAAATCAACCTTT	CAYNTNAGKSTF	TRAV38-2/DV8		TRAJ27	TRA
PBMC-Naive-alpha	1718	28	0.0001	TGTGCTGTCCGAAGTGGAGGTAGCAACTATAAACTGACATTT	CAVRSGGSNYKLTF	TRAV36/DV7		TRAJ53	TRA
PBMC-Naive-alpha	1719	28	0.0001	TGTGCTGGGCACGGGAAGGGAGCCCAGAAGCTGGTATTT	CAGHGKGAQKLVF	TRAV35		TRAJ54	TRA
PBMC-Naive-alpha	1720	28	0.0001	TGTGCTGTGAGGGAATATGGAAACAAGCTGGTCTTT	CAVREYGNKLVF	TRAV21		TRAJ47	TRA
PBMC-Naive-alpha	1721	28	0.0001	TGTGCTACGGAGGCAACTGGGGCAAACAACCTCTTCTTT	CATEATGANNLFF	TRAV17		TRAJ36	TRA
PBMC-Naive-alpha	1722	28	0.0001	TGTGCTTATAGGAGGTACAATAACAATGACATGCGCTTT	CAYRRYNNNDMRF	TRAV38-2/DV8		TRAJ43	TRA
PBMC-Naive-alpha	1723	28	0.0001	TGTGCTTATTCACGGGGAGCCCAGAAGCTGGTATTT	CAYSRGAQKLVF	TRAV38-2/DV8		TRAJ54	TRA
PBMC-Naive-alpha	1724	28	0.0001	TGTGCTGTGGGGGGCAACACAGGCAAACTAATCTTT	CAVGGNTGKLIF	TRAV8-3		TRAJ37	TRA
PBMC-Naive-alpha	1725	28	0.0001	TGTGCTGTGAGTGTTGGAAACAAACTGGTCTTT	CAVSVGNKLVF	TRAV21		TRAJ47	TRA
PBMC-Naive-alpha	1726	28	0.0001	TGTGCTGGGCAAGGAGCCCAGAAGCTGGTATTT	CAGQGAQKLVF	TRAV35		TRAJ54	TRA
PBMC-Naive-alpha	1727	28	0.0001	TGTGCTACGGCCCTAAACCAGGCAGGAACTGCTCTGATCTTT	CATALNQAGTALIF	TRAV17		TRAJ15	TRA
PBMC-Naive-alpha	1728	28	0.0001	TGTGCTGTTAATGCTGGTGGTACTAGCTATGGAAAGCTGACATTT	CAVNAGGTSYGKLTF	TRAV21		TRAJ52	TRA
PBMC-Naive-alpha	1729	28	0.0001	TGTGCTGTTGACTATGGTCAGAATTTTGTCTTT	CAVDYGQNFVF	TRAV2		TRAJ26	TRA
PBMC-Naive-alpha	1730	28	0.0001	TGTGCTCTGAGTGAGGCGGCAGTCGATGGTGGTGCTACAAACAAGCTCATCTTT	CALSEAAVDGGATNKLIF	TRAV19		TRAJ32	TRA
PBMC-Naive-alpha	1731	28	0.0001	TGTGCTGGGCAGCTAAGAGGAAGCCAAGGAAATCTCATCTTT	CAGQLRGSQGNLIF	TRAV35		TRAJ42	TRA
PBMC-Naive-alpha	1732	28	0.0001	TGTGCAGCAAGCGTAAGATCAGGATACAGCACCCTCACCTTT	CAASVRSGYSTLTF	TRAV23/DV6		TRAJ11	TRA
PBMC-Naive-alpha	1733	28	0.0001	TGTGCTGGGAACTTTGGAAATGAGAAATTAACCTTT	CAGNFGNEKLTF	TRAV35		TRAJ48	TRA
PBMC-Naive-alpha	1734	28	0.0001	TGTGCTGTGAGGCTTGGCACCGGTAACCAGTTCTATTTT	CAVRLGTGNQFYF	TRAV21		TRAJ49	TRA
PBMC-Naive-alpha	1735	28	0.0001	TGTGCTGTGCCATATGGGAACAACAGACTCGCTTTT	CAVPYGNNRLAF	TRAV21		TRAJ7	TRA
PBMC-Naive-alpha	1736	28	0.0001	TGTGGCACAGAGATGACCTCCTACGACAAGGTGATATTT	CGTEMTSYDKVIF	TRAV30		TRAJ50	TRA
PBMC-Naive-alpha	1737	28	0.0001	TGTGCAGCAAGTATACAGACCAATGCAGGCAAATCAACCTTT	CAASIQTNAGKSTF	TRAV13-1		TRAJ27	TRA
PBMC-Naive-alpha	1738	28	0.0001	TGTGCTCTGATCGTCAATGCAGGCAAATCAACCTTT	CALIVNAGKSTF	TRAV9-2		TRAJ27	TRA
PBMC-Naive-alpha	1739	28	0.0001	TGTGCTGTCTCCAATGACATGCGCTTT	CAVSNDMRF	TRAV21		TRAJ43	TRA
PBMC-Naive-alpha	1740	28	0.0001	TGTGCTGGGCAAGGGAATAACAATGCCAGACTCATGTTT	CAGQGNNNARLMF	TRAV35		TRAJ31	TRA
PBMC-Naive-alpha	1741	28	0.0001	TGTGCTGCAAATAATGCAGGCAACATACTCACCTTT	CAANNAGNILTF	TRAV21		TRAJ39	TRA
PBMC-Naive-alpha	1742	28	0.0001	TGTGCAGAGGCCAATGCAGGCAACATGCTCACCTTT	CAEANAGNMLTF	TRAV13-2		TRAJ39	TRA
PBMC-Naive-alpha	1743	28	0.0001	TGTGCAGCAAGTTTTTCTGGTGGCTACAATAAGCTGATTTTT	CAASFSGGYNKLIF	TRAV13-1		TRAJ4	TRA
PBMC-Naive-alpha	1744	28	0.0001	TGTGCAGCCCGCGACACTGGAGGCTTCAAAACTATCTTT	CAARDTGGFKTIF	TRAV25		TRAJ9	TRA
PBMC-Naive-alpha	1745	28	0.0001	TGTGCAGCAAGTACCAACAACAGACTCGCTTTT	CAASTNNRLAF	TRAV13-1		TRAJ7	TRA
PBMC-Naive-alpha	1746	28	0.0001	TGTGCTCCTACCTACCCGAGCAGTGCTTCCAAGATAATCTTT	CAPTYPSSASKIIF	TRAV9-2		TRAJ3	TRA
PBMC-Naive-alpha	1747	28	0.0001	TGTGCTTGGGGCTGGACTGGAGCCAATAGTAAGCTGACATTT	CAWGWTGANSKLTF	TRAV38-2/DV8		TRAJ56	TRA
PBMC-Naive-alpha	1748	28	0.0001	TGTGTGGCGGTCGACAGAGGCTCAACCCTGGGGAGGCTATACTTT	CVAVDRGSTLGRLYF	TRAV10		TRAJ18	TRA
PBMC-Naive-alpha	1749	28	0.0001	TGTGCTGTATACAACTTCAACAAATTTTACTTT	CAVYNFNKFYF	TRAV1-2		TRAJ21	TRA
PBMC-Naive-alpha	1750	28	0.0001	TGTGCAGCAAGTACAGCTGACAGCTGGGGGAAATTGCAGTTT	CAASTADSWGKLQF	TRAV13-1		TRAJ24	TRA
PBMC-Naive-alpha	1751	28	0.0001	TGCCTCGTGGGTGAGATTCCAAATTCCGGGTATGCACTCAACTTC	CLVGEIPNSGYALNF	TRAV4		TRAJ41	TRA
PBMC-Naive-alpha	1752	28	0.0001	TGTGTGGTACCAGGGGGCACGGGCAGGAGAGCACTTACTTTT	CVVPGGTGRRALTF	TRAV12-1		TRAJ5	TRA
PBMC-Naive-alpha	1753	28	0.0001	TGTGCAGCTCCCCCTTGGTCGGGAGGCTTCAAAACTATCTTT	CAAPPWSGGFKTIF	TRAV13-1		TRAJ9	TRA
PBMC-Naive-alpha	1754	28	0.0001	TGTGCTGTGGAACAAAAAGCGGGCAACTATGGTCAGAATTTTGTCTTT	CAVEQKAGNYGQNFVF	TRAV2		TRAJ26	TRA
PBMC-Naive-alpha	1755	28	0.0001	TGTGCTTTCATGAATAATAATGCAGGCAACATGCTCACCTTT	CAFMNNNAGNMLTF	TRAV38-1		TRAJ39	TRA
PBMC-Naive-alpha	1756	28	0.0001	TGTGCTGCCCCTCGGAATGGCCAGAAGCTGCTCTTT	CAAPRNGQKLLF	TRAV2		TRAJ16	TRA
PBMC-Naive-alpha	1757	28	0.0001	TGTGCAGGAGGGGACTATAATGCAGGCAACATGCTCACCTTT	CAGGDYNAGNMLTF	TRAV27		TRAJ39	TRA
PBMC-Naive-alpha	1758	28	0.0001	TGTGCTGCGCTTAACTATGGTCAGAATTTTGTCTTT	CAALNYGQNFVF	TRAV21		TRAJ26	TRA
PBMC-Naive-alpha	1759	28	0.0001	TGTGCTTATAGGAGCGCGATGTATGGAGGAAGCCAAGGAAATCTCATCTTT	CAYRSAMYGGSQGNLIF	TRAV38-2/DV8		TRAJ42	TRA
PBMC-Naive-alpha	1760	28	0.0001	TGTGCAGCACGGCAAGCTGCAGGCAACAAGCTAACTTTT	CAARQAAGNKLTF	TRAV13-1		TRAJ17	TRA
PBMC-Naive-alpha	1761	28	0.0001	TGTGCTGTGGAGGCGGGCGGCACTGCCAGTAAACTCACCTTT	CAVEAGGTASKLTF	TRAV36/DV7		TRAJ44	TRA
PBMC-Naive-alpha	1762	28	0.0001	TGTGCAGCAAGTAAAAGCAACACACCTCTTGTCTTT	CAASKSNTPLVF	TRAV13-1		TRAJ29	TRA
PBMC-Naive-alpha	1763	28	0.0001	TGTGCTTACACCGACAAGCTCATCTTT	CAYTDKLIF	TRAV38-2/DV8		TRAJ34	TRA
PBMC-Naive-alpha	1764	28	0.0001	TGTGCTTTCCTCAACCAGGCAGGAACTGCTCTGATCTTT	CAFLNQAGTALIF	TRAV38-1		TRAJ15	TRA
PBMC-Naive-alpha	1765	28	0.0001	TGTGCTGTTCTAAATAGTAAGCTGACATTT	CAVLNSKLTF	TRAV21		TRAJ56	TRA
PBMC-Naive-alpha	1766	28	0.0001	TGTGCTGGGCTATATGGTGGTACTAGCTATGGAAAGCTGACATTT	CAGLYGGTSYGKLTF	TRAV35		TRAJ52	TRA
PBMC-Naive-alpha	1767	28	0.0001	TGTGCTCTGAGTGGAAAGGACACGGGCAGGAGAGCACTTACTTTT	CALSGKDTGRRALTF	TRAV9-2		TRAJ5	TRA
PBMC-Naive-alpha	1768	28	0.0001	TGTGCAGCAGTCGTGGGATACAGCACCCTCACCTTT	CAAVVGYSTLTF	TRAV13-1		TRAJ11	TRA
PBMC-Naive-alpha	1769	28	0.0001	TGTGCTGTGCTCGACCAGGCAGGAACTGCTCTGATCTTT	CAVLDQAGTALIF	TRAV2		TRAJ15	TRA
PBMC-Naive-alpha	1770	28	0.0001	TGTGCTCTGAGAGGTAATGCTGGTGGTACTAGCTATGGAAAGCTGACATTT	CALRGNAGGTSYGKLTF	TRAV9-2		TRAJ52	TRA
PBMC-Naive-alpha	1771	28	0.0001	TGTGCTCTGAGTGGGGTCAACACCGGTAACCAGTTCTATTTT	CALSGVNTGNQFYF	TRAV9-2		TRAJ49	TRA
PBMC-Naive-alpha	1772	28	0.0001	TGCCTCGTGGGCCCCTCTGGGGGTTACCAGAAAGTTACCTTT	CLVGPSGGYQKVTF	TRAV4		TRAJ13	TRA
PBMC-Naive-alpha	1773	28	0.0001	TGTGGCACAGATTCCCCGTTTGGGGCTGGGAGTTACCAACTCACTTTC	CGTDSPFGAGSYQLTF	TRAV30		TRAJ28	TRA
PBMC-Naive-alpha	1774	28	0.0001	TGTGCTGTGAGGATAGGTAGAGGCTTTGGGAATGTGCTGCATTGC	CAVRIGRGFGNVLHC	TRAV21		TRAJ35	TRA
PBMC-Naive-alpha	1775	28	0.0001	TGTGCAGCAAGAGGAGGTGCTGACGGACTCACCTTT	CAARGGADGLTF	TRAV13-1		TRAJ45	TRA
PBMC-Naive-alpha	1776	28	0.0001	TGTGCTGTACCGCATAACCAGGGAGGAAAGCTTATCTTC	CAVPHNQGGKLIF	TRAV2		TRAJ23	TRA
PBMC-Naive-alpha	1777	28	0.0001	TGTGCTTATAGGAGCGGAGGAACCAGTGGCTCTAGGTTGACCTTT	CAYRSGGTSGSRLTF	TRAV38-2/DV8		TRAJ58	TRA
PBMC-Naive-alpha	1778	28	0.0001	TGTGCTTCTATCTCCAATGCCAGACTCATGTTT	CASISNARLMF	TRAV38-2/DV8		TRAJ31	TRA
PBMC-Naive-alpha	1779	28	0.0001	TGTGCTCTCGCCCTTTCAGATGGCCAGAAGCTGCTCTTT	CALALSDGQKLLF	TRAV9-2		TRAJ16	TRA
PBMC-Naive-alpha	1780	28	0.0001	TGTGCACTTCCTTATGGGAACAACAGACTCGCTTTT	CALPYGNNRLAF	TRAV13-2		TRAJ7	TRA
PBMC-Naive-alpha	1781	28	0.0001	TGTGCAGCAAGTAGCGCCGGGTATGCACTCAACTTC	CAASSAGYALNF	TRAV13-1		TRAJ41	TRA
PBMC-Naive-alpha	1782	28	0.0001	TGTGCAGCAAGCGCTAAGGTGGGAGCCCAGAAGCTGGTATTT	CAASAKVGAQKLVF	TRAV29/DV5		TRAJ54	TRA
PBMC-Naive-alpha	1783	28	0.0001	TGTGCTGTTTTCAACATGGATAGCAACTATCAGTTAATCTGG	CAVFNMDSNYQLIW	TRAV21		TRAJ33	TRA
PBMC-Naive-alpha	1784	28	0.0001	TGTGCTGGGCGACAAAGTGGAGGTAGCAACTATAAACTGACATTT	CAGRQSGGSNYKLTF	TRAV35		TRAJ53	TRA
PBMC-Naive-alpha	1785	28	0.0001	TGTGCAGCAAGTTCGACCGGTAACCAGTTCTATTTT	CAASSTGNQFYF	TRAV29/DV5		TRAJ49	TRA
PBMC-Naive-alpha	1786	28	0.0001	TGTGCAGAGTACTACCAGAAAGTTACCTTT	CAEYYQKVTF	TRAV13-2		TRAJ13	TRA
PBMC-Naive-alpha	1787	28	0.0001	TGTGCCGTGAACCCGGCGGCCGACAAGCTCATCTTT	CAVNPAADKLIF	TRAV12-2		TRAJ34	TRA
PBMC-Naive-alpha	1788	28	0.0001	TGTGCTGTGAAAACCTCCTACGACAAGGTGATATTT	CAVKTSYDKVIF	TRAV21		TRAJ50	TRA
PBMC-Naive-alpha	1789	28	0.0001	TGTGCCCTGGTGTCTTATAACACCGACAAGCTCATCTTT	CALVSYNTDKLIF	TRAV21		TRAJ34	TRA
PBMC-Naive-alpha	1790	28	0.0001	TGTGCTGTGGAATGGTATGGTGATGACATGCGCTTT	CAVEWYGDDMRF	TRAV22		TRAJ43	TRA
PBMC-Naive-alpha	1791	28	0.0001	TGTGCTGTGGAGGATCAAGGGTATGGAGGAAGCCAAGGAAATCTCATCTTT	CAVEDQGYGGSQGNLIF	TRAV2		TRAJ42	TRA
PBMC-Naive-alpha	1792	28	0.0001	TGTGCAGCAAGTCCGGGCTTTCAGAAACTTGTATTT	CAASPGFQKLVF	TRAV13-1		TRAJ8	TRA
PBMC-Naive-alpha	1793	28	0.0001	TGTGCTCGGACCATGGACACGGGCAGGAGAGCACTTACTTTT	CARTMDTGRRALTF	TRAV9-2		TRAJ5	TRA
PBMC-Naive-alpha	1794	28	0.0001	TGTGTGGTGAGCGGAAGAGCTGACAGCTGGGGGAAATTGCAGTTT	CVVSGRADSWGKLQF	TRAV10		TRAJ24	TRA
PBMC-Naive-alpha	1795	28	0.0001	TGTGCTCTCCGGAACACCGACAAGCTCATCTTT	CALRNTDKLIF	TRAV9-2		TRAJ34	TRA
PBMC-Naive-alpha	1796	28	0.0001	TGTGCTGTGAGGGTTTATAACACCGACAAGCTCATCTTT	CAVRVYNTDKLIF	TRAV21		TRAJ34	TRA
PBMC-Naive-alpha	1797	28	0.0001	TGTGCTGTTTATGGTCAGAATTTTGTCTTT	CAVYGQNFVF	TRAV21		TRAJ26	TRA
PBMC-Naive-alpha	1798	28	0.0001	TGTGCTGGGCAGCCTAACCCGGATAGCAACTATCAGTTAATCTGG	CAGQPNPDSNYQLIW	TRAV35		TRAJ33	TRA
PBMC-Naive-alpha	1799	28	0.0001	TGTGCTCTGAGTGGGGCGAATGACATGCGCTTT	CALSGANDMRF	TRAV9-2		TRAJ43	TRA
PBMC-Naive-alpha	1800	28	0.0001	TGTGCAGCAATCAATACCGGCACTGCCAGTAAACTCACCTTT	CAAINTGTASKLTF	TRAV13-1		TRAJ44	TRA
PBMC-Naive-alpha	1801	28	0.0001	TGTGCAGATAACCGGGATAACTATGGTCAGAATTTTGTCTTT	CADNRDNYGQNFVF	TRAV13-1		TRAJ26	TRA
PBMC-Naive-alpha	1802	28	0.0001	TGTGCAGCAAGTGAACACATGCTCACCTTT	CAASEHMLTF	TRAV29/DV5		TRAJ39	TRA
PBMC-Naive-alpha	1803	28	0.0001	TGTGCTGTGGAGGATCGAGGGGATAGCAACTATCAGTTAATCTGG	CAVEDRGDSNYQLIW	TRAV2		TRAJ33	TRA
PBMC-Naive-alpha	1804	28	0.0001	TGTGCTCTACCGTCGCAGGCAGGAACTGCTCTGATCTTT	CALPSQAGTALIF	TRAV6		TRAJ15	TRA
PBMC-Naive-alpha	1805	28	0.0001	TGTGCAGGAGATAAAAACACCGGTAACCAGTTCTATTTT	CAGDKNTGNQFYF	TRAV27		TRAJ49	TRA
PBMC-Naive-alpha	1806	28	0.0001	TGTGCAGGAGGATCGGGCTCTGGCAACACAGGCAAACTAATCTTT	CAGGSGSGNTGKLIF	TRAV13-1		TRAJ37	TRA
PBMC-Naive-alpha	1807	28	0.0001	TGTGCTGTGGGGAGGCCCGGAGGAGGAAAGCTTATCTTC	CAVGRPGGGKLIF	TRAV21		TRAJ23	TRA
PBMC-Naive-alpha	1808	28	0.0001	TGTGGAGCAGCTTCCTATTCAGGAGGAGGTGCTGACGGACTCACCTTT	CGAASYSGGGADGLTF	TRAV34		TRAJ45	TRA
PBMC-Naive-alpha	1809	28	0.0001	TGTGCTGTCCTACCCCCTCTTGGTGGTGGTGCTACAAACAAGCTCATCTTT	CAVLPPLGGGATNKLIF	TRAV41		TRAJ32	TRA
PBMC-Naive-alpha	1810	28	0.0001	TGTGCTGTGTCAGGAACTGCTCTGATCTTT	CAVSGTALIF	TRAV21		TRAJ15	TRA
PBMC-Naive-alpha	1811	28	0.0001	TGTGCTTATAGGAGTTTGGGAGCCCAGAAGCTGGTATTT	CAYRSLGAQKLVF	TRAV38-2/DV8		TRAJ54	TRA
PBMC-Naive-alpha	1812	28	0.0001	TGTGGCACAGGGCTCTCTGGCAACACAGGCAAACTAATCTTT	CGTGLSGNTGKLIF	TRAV30		TRAJ37	TRA
PBMC-Naive-alpha	1813	28	0.0001	TGTGCAGAGAGGCGTTCTGCAAGGCAACTGACCTTT	CAERRSARQLTF	TRAV13-2		TRAJ22	TRA
PBMC-Naive-alpha	1814	28	0.0001	TGTGCAGGGTCCTCTAGCAACACAGGCAAACTAATCTTT	CAGSSSNTGKLIF	TRAV27		TRAJ37	TRA
PBMC-Naive-alpha	1815	28	0.0001	TGCGCTGTTGACAGCTGGGGGAAATTGCAGTTT	CAVDSWGKLQF	TRAV1-1		TRAJ24	TRA
PBMC-Naive-alpha	1816	28	0.0001	TGTGCTACCTATTCCGGGTATGCACTCAACTTC	CATYSGYALNF	TRAV17		TRAJ41	TRA
PBMC-Naive-alpha	1817	28	0.0001	TGTGCTGTGGAGGGTGACAGCTGGGGGAAATTGCAGTTT	CAVEGDSWGKLQF	TRAV36/DV7		TRAJ24	TRA
PBMC-Naive-alpha	1818	28	0.0001	TGTGCTCTGAAAGGAGGAAGCTACATACCTACATTT	CALKGGSYIPTF	TRAV9-2		TRAJ6	TRA
PBMC-Naive-alpha	1819	27	0.0001	TGTGCTGTGAGGCTTAACACCAATGCAGGCAAATCAACCTTT	CAVRLNTNAGKSTF	TRAV21		TRAJ27	TRA
PBMC-Naive-alpha	1820	27	0.0001	TGTGCTGTGGAGGATAATGCAGGCAACATGCTCACCTTT	CAVEDNAGNMLTF	TRAV2		TRAJ39	TRA
PBMC-Naive-alpha	1821	27	0.0001	TGTGCAGCAAGTATCGAAAGCAGTGCTTCCAAGATAATCTTT	CAASIESSASKIIF	TRAV13-1		TRAJ3	TRA
PBMC-Naive-alpha	1822	27	0.0001	TGTGCTCTGACCGGTGGTACTAGCTATGGAAAGCTGACATTT	CALTGGTSYGKLTF	TRAV9-2		TRAJ52	TRA
PBMC-Naive-alpha	1823	27	0.0001	TGCCTCGTGGACCCTGTACAGTACAGCAGTGCTTCCAAGATAATCTTT	CLVDPVQYSSASKIIF	TRAV4		TRAJ3	TRA
PBMC-Naive-alpha	1824	27	0.0001	TGTGCAACGAATCTCCAGGCCGGAGCCAATAGTAAGCTGACATTT	CATNLQAGANSKLTF	TRAV13-1		TRAJ56	TRA
PBMC-Naive-alpha	1825	27	0.0001	TGTGCTGGTATCTCAAATTCCGGGTATGCACTCAACTTC	CAGISNSGYALNF	TRAV35		TRAJ41	TRA
PBMC-Naive-alpha	1826	27	0.0001	TGTGGCACAGAGAAAGTGGACACCGGTAACCAGTTCTATTTT	CGTEKVDTGNQFYF	TRAV30		TRAJ49	TRA
PBMC-Naive-alpha	1827	27	0.0001	TGTGCTTTCATGAAGCACACCGGTAACCAGTTCTATTTT	CAFMKHTGNQFYF	TRAV38-1		TRAJ49	TRA
PBMC-Naive-alpha	1828	27	0.0001	TGTGCAGGAGCAGGGACTAGCTATGGAAAGCTGACATTT	CAGAGTSYGKLTF	TRAV27		TRAJ52	TRA
PBMC-Naive-alpha	1829	27	0.0001	TGTGCTTATAGGAGACACAAGCTCATCTTT	CAYRRHKLIF	TRAV38-2/DV8		TRAJ32	TRA
PBMC-Naive-alpha	1830	27	0.0001	TGCCTCGTGGGTGACTCTGGGGCTGGGAGTTACCAACTCACTTTC	CLVGDSGAGSYQLTF	TRAV4		TRAJ28	TRA
PBMC-Naive-alpha	1831	27	0.0001	TGTGCTGTGAGGGAATATGGAAACAAACTGGTCTTT	CAVREYGNKLVF	TRAV21		TRAJ47	TRA
PBMC-Naive-alpha	1832	27	0.0001	TGTGCTGTGAACGATGCCAGACTCATGTTT	CAVNDARLMF	TRAV2		TRAJ31	TRA
PBMC-Naive-alpha	1833	27	0.0001	TGTGTGGTGAGCGGGAGTATGGACACGGGCAGGAGAGCACTTACTTTT	CVVSGSMDTGRRALTF	TRAV10		TRAJ5	TRA
PBMC-Naive-alpha	1834	27	0.0001	TGCCTCGTGGGTACCCGGAATAACAATGCCAGACTCATGTTT	CLVGTRNNNARLMF	TRAV4		TRAJ31	TRA
PBMC-Naive-alpha	1835	27	0.0001	TGTGCTCTGAGTGATCCTAACTTTGGAAATGAGAAATTAACCTTT	CALSDPNFGNEKLTF	TRAV9-2		TRAJ48	TRA
PBMC-Naive-alpha	1836	27	0.0001	TGTGCTGTGAAGATGGATAGCAGCTATAAATTGATCTTC	CAVKMDSSYKLIF	TRAV1-2		TRAJ12	TRA
PBMC-Naive-alpha	1837	27	0.0001	TGTGCTGTGGGTGCCCCATCAGGAGGAAGCTACATACCTACATTT	CAVGAPSGGSYIPTF	TRAV8-3		TRAJ6	TRA
PBMC-Naive-alpha	1838	27	0.0001	TGTGCTGTGGAGGATACGAACAAGCTCATCTTT	CAVEDTNKLIF	TRAV2		TRAJ34	TRA
PBMC-Naive-alpha	1839	27	0.0001	TGTGCAGCCTCAGCAGGGGGGCAGTTCTATTTT	CAASAGGQFYF	TRAV29/DV5		TRAJ49	TRA
PBMC-Naive-alpha	1840	27	0.0001	TGCGCTGTGAGAGGGCAACTGACCTTT	CAVRGQLTF	TRAV1-1		TRAJ22	TRA
PBMC-Naive-alpha	1841	27	0.0001	TGTGCTCTGAGTGATCGAGGAAATGAGAAATTAACCTTT	CALSDRGNEKLTF	TRAV9-2		TRAJ48	TRA
PBMC-Naive-alpha	1842	27	0.0001	TGTGCAGCCTCGACGGGTGCCAGACTCATGTTT	CAASTGARLMF	TRAV13-1		TRAJ31	TRA
PBMC-Naive-alpha	1843	27	0.0001	TGTGCTTATAGGAGTACGGGTAACCAGTTCTATTTT	CAYRSTGNQFYF	TRAV38-2/DV8		TRAJ49	TRA
PBMC-Naive-alpha	1844	27	0.0001	TGTGCTCTGAGCCACGCAGGCAAATCAACCTTT	CALSHAGKSTF	TRAV9-2		TRAJ27	TRA
PBMC-Naive-alpha	1845	27	0.0001	TGTGCTCCCCGGTCAGGATACAGCACCCTCACCTTT	CAPRSGYSTLTF	TRAV6		TRAJ11	TRA
PBMC-Naive-alpha	1846	27	0.0001	TGTGCAGCAAGTAAGGGCAAGCTCATCTTT	CAASKGKLIF	TRAV13-1		TRAJ34	TRA
PBMC-Naive-alpha	1847	27	0.0001	TGTGCTTTCATGAGTTATGGAGGAAGCCAAGGAAATCTCATCTTT	CAFMSYGGSQGNLIF	TRAV38-1		TRAJ42	TRA
PBMC-Naive-alpha	1848	27	0.0001	TGTGCAGCAAGGGGAAATACTGGAGGCTTCAAAACTATCTTT	CAARGNTGGFKTIF	TRAV13-1		TRAJ9	TRA
PBMC-Naive-alpha	1849	27	0.0001	TGTGCAGAGAATGGCGGATACAGCACCCTCACCTTT	CAENGGYSTLTF	TRAV13-2		TRAJ11	TRA
PBMC-Naive-alpha	1850	27	0.0001	TGTGCTGGAACTGGAGCCAATAGTAAGCTGACATTT	CAGTGANSKLTF	TRAV21		TRAJ56	TRA
PBMC-Naive-alpha	1851	27	0.0001	TGTGCTGTGACGCCGGGGGATACTGCAGGCAACATGCTCACCTTT	CAVTPGDTAGNMLTF	TRAV21		TRAJ39	TRA
PBMC-Naive-alpha	1852	27	0.0001	TGTGCTACTGAAGCTGCAGGCAACAAGCTAACTTTT	CATEAAGNKLTF	TRAV17		TRAJ17	TRA
PBMC-Naive-alpha	1853	27	0.0001	TGTCTTCTTGGGGGCAATGACATGCGCTTT	CLLGGNDMRF	TRAV40		TRAJ43	TRA
PBMC-Naive-alpha	1854	27	0.0001	TGTGCTGTCCTCCCGAATAACTATGGTCAGAATTTTGTCTTT	CAVLPNNYGQNFVF	TRAV21		TRAJ26	TRA
PBMC-Naive-alpha	1855	27	0.0001	TGCCTCGTGGGTGCATCAGGAGGAAGCTACATACCTACATTT	CLVGASGGSYIPTF	TRAV4		TRAJ6	TRA
PBMC-Naive-alpha	1856	27	0.0001	TGTGTGGTGAGCGCGAGACCTAACTTTGGAAATGAGAAATTAACCTTT	CVVSARPNFGNEKLTF	TRAV10		TRAJ48	TRA
PBMC-Naive-alpha	1857	27	0.0001	TGTGCTGTGGAGGGGAACAACAGACTCGCTTTT	CAVEGNNRLAF	TRAV21		TRAJ7	TRA
PBMC-Naive-alpha	1858	27	0.0001	TGTGCTGCTCGAGGTCAGGGAGCCCAGAAGCTGGTATTT	CAARGQGAQKLVF	TRAV21		TRAJ54	TRA
PBMC-Naive-alpha	1859	27	0.0001	TGTGCAGCAAGCGACAGCGGAAATGAGAAATTAACCTTT	CAASDSGNEKLTF	TRAV29/DV5		TRAJ48	TRA
PBMC-Naive-alpha	1860	27	0.0001	TGTGCTGTGCTGACTAATGCTGGTGGTACTAGCTATGGAAAGCTGACATTT	CAVLTNAGGTSYGKLTF	TRAV20		TRAJ52	TRA
PBMC-Naive-alpha	1861	27	0.0001	TGTGCAGCAACCCCGGTGGGCAATGCCAGACTCATGTTT	CAATPVGNARLMF	TRAV13-1		TRAJ31	TRA
PBMC-Naive-alpha	1862	27	0.0001	TGTGCAGCCCTGGGAGGATACAGCACCCTCACCTTT	CAALGGYSTLTF	TRAV13-1		TRAJ11	TRA
PBMC-Naive-alpha	1863	27	0.0001	TGCCTCGTGGGTGCCTTTTATGGTGGTGCTACAAACAAGCTCATCTTT	CLVGAFYGGATNKLIF	TRAV4		TRAJ32	TRA
PBMC-Naive-alpha	1864	27	0.0001	TGTGCTTATGCTCAGACTGGGGGTTACCAGAAAGTTACCTTT	CAYAQTGGYQKVTF	TRAV38-2/DV8		TRAJ13	TRA
PBMC-Naive-alpha	1865	27	0.0001	TGTGCCGAGCTACTAGATTCTGGTTCTGCAAGGCAACTGACCTTT	CAELLDSGSARQLTF	TRAV39		TRAJ22	TRA
PBMC-Naive-alpha	1866	27	0.0001	TGTGCAGCAAGCGGAACCTCCTACGACAAGGTGATATTT	CAASGTSYDKVIF	TRAV29/DV5		TRAJ50	TRA
PBMC-Naive-alpha	1867	27	0.0001	TGTGCTGTCTTGAACAGAGATGACAAGATCATCTTT	CAVLNRDDKIIF	TRAV2		TRAJ30	TRA
PBMC-Naive-alpha	1868	27	0.0001	TGTGCAGGAGGAGGAGGTGCTGACGGACTCACCTTT	CAGGGGADGLTF	TRAV13-1		TRAJ45	TRA
PBMC-Naive-alpha	1869	27	0.0001	TGTGCTCTGATCGCGAATTCAGGATACAGCACCCTCACCTTT	CALIANSGYSTLTF	TRAV9-2		TRAJ11	TRA
PBMC-Naive-alpha	1870	27	0.0001	TGTGCTGTGGAGGAAGAAACGGGCAGGAGAGCACTTACTTTT	CAVEEETGRRALTF	TRAV2		TRAJ5	TRA
PBMC-Naive-alpha	1871	27	0.0001	TGTGCTTGGGTTTCTAGCAACACAGGCAAACTAATCTTT	CAWVSSNTGKLIF	TRAV36/DV7		TRAJ37	TRA
PBMC-Naive-alpha	1872	27	0.0001	TGTGCTGCGTCTATGGATAGCAACTATCAGTTAATCTGG	CAASMDSNYQLIW	TRAV21		TRAJ33	TRA
PBMC-Naive-alpha	1873	27	0.0001	TGTGCTGGACTCCCCCGTGGTACTAGCTATGGAAAGCTGACATTT	CAGLPRGTSYGKLTF	TRAV35		TRAJ52	TRA
PBMC-Naive-alpha	1874	27	0.0001	TGTGCTGTGACAGGGGCAAACAACCTCTTCTTT	CAVTGANNLFF	TRAV21		TRAJ36	TRA
PBMC-Naive-alpha	1875	27	0.0001	TGTGCTGTGGAGGGAGATAGCAGCTATAAATTGATCTTC	CAVEGDSSYKLIF	TRAV2		TRAJ12	TRA
PBMC-Naive-alpha	1876	27	0.0001	TGTGCTTATCGGGTCAGAGATGACAAGATCATCTTT	CAYRVRDDKIIF	TRAV38-2/DV8		TRAJ30	TRA
PBMC-Naive-alpha	1877	27	0.0001	TGTGCAGCAAGTTACAATAACAATGACATGCGCTTT	CAASYNNNDMRF	TRAV13-1		TRAJ43	TRA
PBMC-Naive-alpha	1878	27	0.0001	TGCCTCGTGGGTGACGATGGGGGCAGGAGAGCACTTACTTTT	CLVGDDGGRRALTF	TRAV4		TRAJ5	TRA
PBMC-Naive-alpha	1879	27	0.0001	TGTGCTTCCTCTTCTGGTGGTACTAGCTATGGAAAGCTGACATTT	CASSSGGTSYGKLTF	TRAV38-1		TRAJ52	TRA
PBMC-Naive-alpha	1880	27	0.0001	TGTGCTTCCCTTGACGGAAACTTTGGAAATGAGAAATTAACCTTT	CASLDGNFGNEKLTF	TRAV38-1		TRAJ48	TRA
PBMC-Naive-alpha	1881	27	0.0001	TGCCTCGTGGGTGATTCCGTAGGTAACGACTACAAGCTCAGCTTT	CLVGDSVGNDYKLSF	TRAV4		TRAJ20	TRA
PBMC-Naive-alpha	1882	27	0.0001	TGTGCTGGGAAGAATTCAGGAAACACACCTCTTGTCTTT	CAGKNSGNTPLVF	TRAV36/DV7		TRAJ29	TRA
PBMC-Naive-alpha	1883	27	0.0001	TGTGCAATGAGCCGCCCCCAGGATAAGCTGATTTTT	CAMSRPQDKLIF	TRAV12-3		TRAJ4	TRA
PBMC-Naive-alpha	1884	27	0.0001	TGTGCAGAGAGTATTCGTCGTGGTGGTGCTACAAACAAGCTCATCTTT	CAESIRRGGATNKLIF	TRAV5		TRAJ32	TRA
PBMC-Naive-alpha	1885	27	0.0001	TGTGCTCTGAGTGGAGATGGAAACAAACTGGTCTTT	CALSGDGNKLVF	TRAV9-2		TRAJ47	TRA
PBMC-Naive-alpha	1886	27	0.0001	TGTGCTTTCATGAAGTACAGGAACAATGCCAGACTCATGTTT	CAFMKYRNNARLMF	TRAV38-1		TRAJ31	TRA
PBMC-Naive-alpha	1887	27	0.0001	TGTGCAGAGTACAGCAGTGCTTCCAAGATAATCTTT	CAEYSSASKIIF	TRAV5		TRAJ3	TRA
PBMC-Naive-alpha	1888	27	0.0001	TGTGCTGTCCAATTAACTGACAGCTGGGGGAAATTGCAGTTT	CAVQLTDSWGKLQF	TRAV21		TRAJ24	TRA
PBMC-Naive-alpha	1889	27	0.0001	TGTGCCCTTTATAATAATGCAGGCAACATGCTCACCTTT	CALYNNAGNMLTF	TRAV9-2		TRAJ39	TRA
PBMC-Naive-alpha	1890	27	0.0001	TGTGCAATGAGAGAGCCTTCATCAGGAGGAAGCTACATACCTACATTT	CAMREPSSGGSYIPTF	TRAV14/DV4		TRAJ6	TRA
PBMC-Naive-alpha	1891	27	0.0001	TGTGCTACCTGTCAGGGAGCCCAGAAGCTGGTATTT	CATCQGAQKLVF	TRAV38-1		TRAJ54	TRA
PBMC-Naive-alpha	1892	27	0.0001	TGTGTGGTGAGCGAACACACCGTCGAAGGTCACATGCGCTTT	CVVSEHTVEGHMRF	TRAV10		TRAJ43	TRA
PBMC-Naive-alpha	1893	27	0.0001	TGTGCAGCAAGTATGCACAGCACCCTCACCTTT	CAASMHSTLTF	TRAV13-1		TRAJ11	TRA
PBMC-Naive-alpha	1894	27	0.0001	TGTGGCGGGGGCTATAAATTGATCTTC	CGGGYKLIF	TRAV13-1		TRAJ12	TRA
PBMC-Naive-alpha	1895	27	0.0001	TGTGCTGTGTCTCCCAGTGGCTCTAGGTTGACCTTT	CAVSPSGSRLTF	TRAV21		TRAJ58	TRA
PBMC-Naive-alpha	1896	27	0.0001	TGTGCAGCAAGCGCGCCGGTTGACACCGACAAGCTCATCTTT	CAASAPVDTDKLIF	TRAV29/DV5		TRAJ34	TRA
PBMC-Naive-alpha	1897	27	0.0001	TGTGCTGGGCATTTTACCTCAGGAACCTACAAATACATCTTT	CAGHFTSGTYKYIF	TRAV35		TRAJ40	TRA
PBMC-Naive-alpha	1898	27	0.0001	TGTGCAGCAAGTATGAACAAACTCACCTTT	CAASMNKLTF	TRAV13-1		TRAJ10	TRA
PBMC-Naive-alpha	1899	27	0.0001	TGTGCAGTACACAATAACAATGACATGCGCTTT	CAVHNNNDMRF	TRAV13-1		TRAJ43	TRA
PBMC-Naive-alpha	1900	27	0.0001	TGTGCTCGGGGGAATAACAATGCCAGACTCATGTTT	CARGNNNARLMF	TRAV21		TRAJ31	TRA
PBMC-Naive-alpha	1901	27	0.0001	TGTGGCACAGGGCATAGAATGAACACAGGCTTTCAGAAACTTGTATTT	CGTGHRMNTGFQKLVF	TRAV30		TRAJ8	TRA
PBMC-Naive-alpha	1902	27	0.0001	TGTGCTCTGAGTAAGGGAGGAGGTGCTGACGGACTCACCTTT	CALSKGGGADGLTF	TRAV9-2		TRAJ45	TRA
PBMC-Naive-alpha	1903	27	0.0001	TGTGTGGTGAGCGCTCGATCTGGTGGCTACAATAAGCTGATTTTT	CVVSARSGGYNKLIF	TRAV10		TRAJ4	TRA
PBMC-Naive-alpha	1904	27	0.0001	TGTGCAGCCGTCGCACGTGGCTCTAGGTTGACCTTT	CAAVARGSRLTF	TRAV29/DV5		TRAJ58	TRA
PBMC-Naive-alpha	1905	27	0.0001	TGTGCTGTCCCCATTTCAGATGGCCAGAAGCTGCTCTTT	CAVPISDGQKLLF	TRAV21		TRAJ16	TRA
PBMC-Naive-alpha	1906	27	0.0001	TGTGCTCTGAGTCCCCACAACCAGGGAGGAAAGCTTATCTTC	CALSPHNQGGKLIF	TRAV9-2		TRAJ23	TRA
PBMC-Naive-alpha	1907	27	0.0001	TGTGCAGGGTTGAATTATGGAGGAAGCCAAGGAAATCTCATCTTT	CAGLNYGGSQGNLIF	TRAV25		TRAJ42	TRA
PBMC-Naive-alpha	1908	27	0.0001	TGTGCTGTGGATTCAGGAAACACACCTCTTGTCTTT	CAVDSGNTPLVF	TRAV21		TRAJ29	TRA
PBMC-Naive-alpha	1909	27	0.0001	TGTGCTGTGCAAGACAATGCCAGACTCATGTTT	CAVQDNARLMF	TRAV2		TRAJ31	TRA
PBMC-Naive-alpha	1910	27	0.0001	TGTGTGGTGGGGGAATCTAACTTTGGAAATGAGAAATTAACCTTT	CVVGESNFGNEKLTF	TRAV10		TRAJ48	TRA
PBMC-Naive-alpha	1911	27	0.0001	TGTGCTCTACTGGACACGGGCAGGAGAGCACTTACTTTT	CALLDTGRRALTF	TRAV9-2		TRAJ5	TRA
PBMC-Naive-alpha	1912	27	0.0001	TGTGCTGTGAAGGTCACGGGAGGAGGAAACAAACTCACCTTT	CAVKVTGGGNKLTF	TRAV21		TRAJ10	TRA
PBMC-Naive-alpha	1913	27	0.0001	TGTGCAGGGCCGCTAAGGGCTGGTGGTACTAGCTATGGAAAGCTGACATTT	CAGPLRAGGTSYGKLTF	TRAV25		TRAJ52	TRA
PBMC-Naive-alpha	1914	27	0.0001	TGTGCTGTACCCTTCACTGGAGCCAATAGTAAGCTGACATTT	CAVPFTGANSKLTF	TRAV22		TRAJ56	TRA
PBMC-Naive-alpha	1915	27	0.0001	TGTGCCGTGGTATCTAACTTTGGAAATGAGAAATTAACCTTT	CAVVSNFGNEKLTF	TRAV39		TRAJ48	TRA
PBMC-Naive-alpha	1916	27	0.0001	TGTGTGGTGGTTTCAGGAGGAAGCTACATACCTACATTT	CVVVSGGSYIPTF	TRAV10		TRAJ6	TRA
PBMC-Naive-alpha	1917	27	0.0001	TGTGCTGTGGATGACACAGGCTTTCAGAAACTTGTATTT	CAVDDTGFQKLVF	TRAV21		TRAJ8	TRA
PBMC-Naive-alpha	1918	27	0.0001	TGTGGCACAGAAACAGGAACCTACAAATACATCTTT	CGTETGTYKYIF	TRAV30		TRAJ40	TRA
PBMC-Naive-alpha	1919	27	0.0001	TGTGCCGCTTATACTGGAGGCTTCAAAACTATCTTT	CAAYTGGFKTIF	TRAV21		TRAJ9	TRA
PBMC-Naive-alpha	1920	27	0.0001	TGTGCAGCTCTAGGGCGTTCTAACGACTACAAGCTCAGCTTT	CAALGRSNDYKLSF	TRAV13-1		TRAJ20	TRA
PBMC-Naive-alpha	1921	27	0.0001	TGTGGCACAGATTCCCTAGTTCTTAACCAGGGAGGAAAGCTTATCTTC	CGTDSLVLNQGGKLIF	TRAV30		TRAJ23	TRA
PBMC-Naive-alpha	1922	27	0.0001	TGTGCTCTATCTAATGCTGGCAACAACCGTAAGCTGATTTGG	CALSNAGNNRKLIW	TRAV6		TRAJ38	TRA
PBMC-Naive-alpha	1923	27	0.0001	TGTGCTCTCCCTAACGACTACAAGCTCAGCTTT	CALPNDYKLSF	TRAV9-2		TRAJ20	TRA
PBMC-Naive-alpha	1924	27	0.0001	TGTGCGTCCGCCAGAGGCTCAACCCTGGGGAGGCTATACTTT	CASARGSTLGRLYF	TRAV5		TRAJ18	TRA
PBMC-Naive-alpha	1925	27	0.0001	TGTGCATCTAAATCAGGAGGAAGCTACATACCTACATTT	CASKSGGSYIPTF	TRAV13-1		TRAJ6	TRA
PBMC-Naive-alpha	1926	27	0.0001	TGTGCAGAGAATGTGACCCCTGGTTCTGCAAGGCAACTGACCTTT	CAENVTPGSARQLTF	TRAV13-2		TRAJ22	TRA
PBMC-Naive-alpha	1927	27	0.0001	TGTGCTCTGAGTCCTGACAGCTGGGGGAAATTGCAGTTT	CALSPDSWGKLQF	TRAV9-2		TRAJ24	TRA
PBMC-Naive-alpha	1928	27	0.0001	TGTGCTCTGAGTGATCGGGACAACACAGGCAAACTAATCTTT	CALSDRDNTGKLIF	TRAV9-2		TRAJ37	TRA
PBMC-Naive-alpha	1929	27	0.0001	TGTGCTTTCATCCCCTACAATAACAATGACATGCGCTTT	CAFIPYNNNDMRF	TRAV38-1		TRAJ43	TRA
PBMC-Naive-alpha	1930	27	0.0001	TGTGCTCTAGGGACTGGAGGCTTCAAAACTATCTTT	CALGTGGFKTIF	TRAV6		TRAJ9	TRA
PBMC-Naive-alpha	1931	27	0.0001	TGTGCTCCGACTAATGCTGGTGGTACTAGCTATGGAAAGCTGACATTT	CAPTNAGGTSYGKLTF	TRAV9-2		TRAJ52	TRA
PBMC-Naive-alpha	1932	27	0.0001	TGTGTTTACCGCGGATGGGAAACCAGTGGCTCTAGGTTGACCTTT	CVYRGWETSGSRLTF	TRAV38-2/DV8		TRAJ58	TRA
PBMC-Naive-alpha	1933	27	0.0001	TGTGCAGCAAGTAGGGAGGGCACAGGCTTTCAGAAACTTGTATTT	CAASREGTGFQKLVF	TRAV13-1		TRAJ8	TRA
PBMC-Naive-alpha	1934	27	0.0001	TGTGCTCGGATTCAGGGAGCCCAGAAGCTGGTATTT	CARIQGAQKLVF	TRAV36/DV7		TRAJ54	TRA
PBMC-Naive-alpha	1935	27	0.0001	TGTGCTCTAGAGTTTTGGAATGCTGGCAACAACCGTAAGCTGATTTGG	CALEFWNAGNNRKLIW	TRAV6		TRAJ38	TRA
PBMC-Naive-alpha	1936	27	0.0001	TGTGCTGGGCAAGGAAATAGTGGAGGTAGCAACTATAAACTGACATTT	CAGQGNSGGSNYKLTF	TRAV35		TRAJ53	TRA
PBMC-Naive-alpha	1937	27	0.0001	TGTGCTCTGAGGAGTAACTATGGTCAGAATTTTGTCTTT	CALRSNYGQNFVF	TRAV9-2		TRAJ26	TRA
PBMC-Naive-alpha	1938	27	0.0001	TGTGCTTATAGGACTGCAACGGGTGACATGCGCTTT	CAYRTATGDMRF	TRAV38-2/DV8		TRAJ43	TRA
PBMC-Naive-alpha	1939	27	0.0001	TGCATCGTCAGATCGGAAGGCGGATCTGAAAAGCTGGTCTTT	CIVRSEGGSEKLVF	TRAV26-1		TRAJ57	TRA
PBMC-Naive-alpha	1940	27	0.0001	TGTGCTGCCCCCAACCAGGCAGGAACTGCTCTGATCTTT	CAAPNQAGTALIF	TRAV21		TRAJ15	TRA
PBMC-Naive-alpha	1941	27	0.0001	TGCCTCGTGGCCCCTAACGACTACAAGCTCAGCTTT	CLVAPNDYKLSF	TRAV4		TRAJ20	TRA
PBMC-Naive-alpha	1942	27	0.0001	TGTGTGGTGAGCCAAAATACTGGAGGCTTCAAAACTATCTTT	CVVSQNTGGFKTIF	TRAV10		TRAJ9	TRA
PBMC-Naive-alpha	1943	27	0.0001	TGTGCTGTCGAGGGTGGTGCTACAAACAAGCTCATCTTT	CAVEGGATNKLIF	TRAV21		TRAJ32	TRA
PBMC-Naive-alpha	1944	27	0.0001	TGTGCTTTCAAAGGACCTGGAGCCAATAGTAAGCTGACATTT	CAFKGPGANSKLTF	TRAV38-1		TRAJ56	TRA
PBMC-Naive-alpha	1945	27	0.0001	TGTGCTCTGAGAAAAGGGGACACCGGTAACCAGTTCTATTTT	CALRKGDTGNQFYF	TRAV9-2		TRAJ49	TRA
PBMC-Naive-alpha	1946	27	0.0001	TGCCTCGTGGGTGACACCTCTACCTCAGGAACCTACAAATACATCTTT	CLVGDTSTSGTYKYIF	TRAV4		TRAJ40	TRA
PBMC-Naive-alpha	1947	27	0.0001	TGTGCTCTGAGTGGGGCCTCAGGAACCTACAAATACATCTTT	CALSGASGTYKYIF	TRAV9-2		TRAJ40	TRA
PBMC-Naive-alpha	1948	27	0.0001	TGTGCTGTGGAGGGAGGAAAGCTTATCTTC	CAVEGGKLIF	TRAV2		TRAJ23	TRA
PBMC-Naive-alpha	1949	27	0.0001	TGTGCAGCAAGCCCCATGAATAATAATGCAGGCAACATGCTCACCTTT	CAASPMNNNAGNMLTF	TRAV13-1		TRAJ39	TRA
PBMC-Naive-alpha	1950	27	0.0001	TGTGTGGTGAGTTACAGCAGTGCTTCCAAGATAATCTTT	CVVSYSSASKIIF	TRAV12-1		TRAJ3	TRA
PBMC-Naive-alpha	1951	27	0.0001	TGTGCTTATGGCAGCTGGGGGAAATTGCAGTTT	CAYGSWGKLQF	TRAV38-2/DV8		TRAJ24	TRA
PBMC-Naive-alpha	1952	27	0.0001	TGTGCGGCCCTGCCTGACAGCTGGGGGAAATTGCAGTTT	CAALPDSWGKLQF	TRAV21		TRAJ24	TRA
PBMC-Naive-alpha	1953	27	0.0001	TGTGCTGTGATACCATTGAACACAGGCTTTCAGAAACTTGTATTT	CAVIPLNTGFQKLVF	TRAV2		TRAJ8	TRA
PBMC-Naive-alpha	1954	27	0.0001	TGTGCTCTGAAATACGGAGCCCAGAAGCTGGTATTT	CALKYGAQKLVF	TRAV9-2		TRAJ54	TRA
PBMC-Naive-alpha	1955	27	0.0001	TGTGCTTTCATGAACTCTAACTTTGGAAATGAGAAATTAACCTTT	CAFMNSNFGNEKLTF	TRAV38-1		TRAJ48	TRA
PBMC-Naive-alpha	1956	27	0.0001	TGTGCTCTGAGCGATCGGCTGGAATATGGAAACAAGCTGGTCTTT	CALSDRLEYGNKLVF	TRAV9-2		TRAJ47	TRA
PBMC-Naive-alpha	1957	27	0.0001	TGTGCAGCAAGTATTCGGAGCAGTGCTTCCAAGATAATCTTT	CAASIRSSASKIIF	TRAV13-1		TRAJ3	TRA
PBMC-Naive-alpha	1958	27	0.0001	TGTGCTTTCATATCTAACTTTGGAAATGAGAAATTAACCTTT	CAFISNFGNEKLTF	TRAV38-1		TRAJ48	TRA
PBMC-Naive-alpha	1959	27	0.0001	TGTGCTCTGAGTGATCTTGAAGGATACAGCACCCTCACCTTT	CALSDLEGYSTLTF	TRAV9-2		TRAJ11	TRA
PBMC-Naive-alpha	1960	27	0.0001	TGTGCTACGGACGCAGGCAACATGCTCACCTTT	CATDAGNMLTF	TRAV17		TRAJ39	TRA
PBMC-Naive-alpha	1961	27	0.0001	TGTGCAGCAATCTTTACCGGCACTGCCAGTAAACTCACCTTT	CAAIFTGTASKLTF	TRAV13-1		TRAJ44	TRA
PBMC-Naive-alpha	1962	27	0.0001	TGTGCTTTCACCAATGCAGGCAAATCAACCTTT	CAFTNAGKSTF	TRAV38-1		TRAJ27	TRA
PBMC-Naive-alpha	1963	27	0.0001	TGTGCTTATAGGAGCGCGTCAGGCTCCGGGTATGCACTCAACTTC	CAYRSASGSGYALNF	TRAV38-2/DV8		TRAJ41	TRA
PBMC-Naive-alpha	1964	27	0.0001	TGTGCTGTGGCATCAGGAGGAGGTGCTGACGGACTCACCTTT	CAVASGGGADGLTF	TRAV22		TRAJ45	TRA
PBMC-Naive-alpha	1965	27	0.0001	TGTGCTCCTTACTTT	CAPYF	TRAV1-2		TRAJ29	TRA
PBMC-Naive-alpha	1966	27	0.0001	TGTGCCGTGAGCCCCTCCGACCAGGCAGGAACTGCTCTGATCTTT	CAVSPSDQAGTALIF	TRAV12-2		TRAJ15	TRA
PBMC-Naive-alpha	1967	27	0.0001	TGTGCAGCAAGTATAGAAGGAGGAAGCTACATACCTACATTT	CAASIEGGSYIPTF	TRAV13-1		TRAJ6	TRA
PBMC-Naive-alpha	1968	27	0.0001	TGTGCTTATTCAGAACACCCCTCAGGAACCTACAAATACATCTTT	CAYSEHPSGTYKYIF	TRAV38-2/DV8		TRAJ40	TRA
PBMC-Naive-alpha	1969	27	0.0001	TGTGCTTACTCGCCCGGCTCTAGCAACACAGGCAAACTAATCTTT	CAYSPGSSNTGKLIF	TRAV38-1		TRAJ37	TRA
PBMC-Naive-alpha	1970	27	0.0001	TGTGCTCCTTTGGATAGCAACTATCAGTTAATCTGG	CAPLDSNYQLIW	TRAV1-2		TRAJ33	TRA
PBMC-Naive-alpha	1971	27	0.0001	TGTGCAGCAAGTAAGGGAAAAGGAGGAGGAAACAAACTCACCTTT	CAASKGKGGGNKLTF	TRAV13-1		TRAJ10	TRA
PBMC-Naive-alpha	1972	27	0.0001	TGTGCTTATGAGGCCTCCGGGTATGCACTCAACTTC	CAYEASGYALNF	TRAV38-2/DV8		TRAJ41	TRA
PBMC-Naive-alpha	1973	27	0.0001	TGTGCTGTGGAGGCCTTTTCAGGAAACACACCTCTTGTCTTT	CAVEAFSGNTPLVF	TRAV2		TRAJ29	TRA
PBMC-Naive-alpha	1974	27	0.0001	TGTGCTTATTATTTCACCGGTAACCAGTTCTATTTT	CAYYFTGNQFYF	TRAV38-2/DV8		TRAJ49	TRA
PBMC-Naive-alpha	1975	27	0.0001	TGTGCTACGGTAAATGCTGGCAACAACCGTAAGCTGATTTGG	CATVNAGNNRKLIW	TRAV17		TRAJ38	TRA
PBMC-Naive-alpha	1976	27	0.0001	TGTGCAGCAAGTTCAGGAACCTACAAATACATCTTT	CAASSGTYKYIF	TRAV13-1		TRAJ40	TRA
PBMC-Naive-alpha	1977	27	0.0001	TGTGCTTATAGGGTCATAATTCAGGGAGCCCAGAAGCTGGTATTT	CAYRVIIQGAQKLVF	TRAV38-2/DV8		TRAJ54	TRA
PBMC-Naive-alpha	1978	27	0.0001	TGTGCTCTGAGTGATTACAACTTCAACAAATTTTACTTT	CALSDYNFNKFYF	TRAV9-2		TRAJ21	TRA
PBMC-Naive-alpha	1979	27	0.0001	TGTGCTACGGGTTCAGGATACAGCACCCTCACCTTT	CATGSGYSTLTF	TRAV17		TRAJ11	TRA
PBMC-Naive-alpha	1980	27	0.0001	TGTGCTGTGAAGTGGACTGGTGGCTACAATAAGCTGATTTTT	CAVKWTGGYNKLIF	TRAV21		TRAJ4	TRA
PBMC-Naive-alpha	1981	27	0.0001	TGTGCTCTGAGTAATGCCAGACTCATGTTT	CALSNARLMF	TRAV9-2		TRAJ31	TRA
PBMC-Naive-alpha	1982	27	0.0001	TGTGCAGTTGATACCGGCACTGCCAGTAAACTCACCTTT	CAVDTGTASKLTF	TRAV13-1		TRAJ44	TRA
PBMC-Naive-alpha	1983	27	0.0001	TGTGCTACTGCCCCTCTAGGCGGAAATGAGAAATTAACCTTT	CATAPLGGNEKLTF	TRAV17		TRAJ48	TRA
PBMC-Naive-alpha	1984	27	0.0001	TGTGCTTTCGCCTATACTGGAGCCAATAGTAAGCTGACATTT	CAFAYTGANSKLTF	TRAV38-1		TRAJ56	TRA
PBMC-Naive-alpha	1985	27	0.0001	TGTGTGCTCTCCATCTACAGCAGTGCTTCCAAGATAATCTTT	CVLSIYSSASKIIF	TRAV12-1		TRAJ3	TRA
PBMC-Naive-alpha	1986	27	0.0001	TGTGCTGTGCGAAGTAGCTATGGTCAGAATTTTGTCTTT	CAVRSSYGQNFVF	TRAV20		TRAJ26	TRA
PBMC-Naive-alpha	1987	27	0.0001	TGTGCTTTCATTTCCACTGGAGCCAATAGTAAGCTGACATTT	CAFISTGANSKLTF	TRAV38-1		TRAJ56	TRA
PBMC-Naive-alpha	1988	27	0.0001	TGTGCTCTGAGAAAGGGCGACTACAAGCTCAGCTTT	CALRKGDYKLSF	TRAV9-2		TRAJ20	TRA
PBMC-Naive-alpha	1989	27	0.0001	TGTGCCGTGGGGGGTTTTGCTACAAACAAGCTCATCTTT	CAVGGFATNKLIF	TRAV39		TRAJ32	TRA
PBMC-Naive-alpha	1990	27	0.0001	TGTGCTGTGACAGATGGTCAGAATTTTGTCTTT	CAVTDGQNFVF	TRAV21		TRAJ26	TRA
PBMC-Naive-alpha	1991	27	0.0001	TGTGCTGTGAGTGGCTCAGGAACCTACAAATACATCTTT	CAVSGSGTYKYIF	TRAV21		TRAJ40	TRA
PBMC-Naive-alpha	1992	27	0.0001	TGTGCAGGGAACGGTGGCTACAATAAGCTGATTTTT	CAGNGGYNKLIF	TRAV25		TRAJ4	TRA
PBMC-Naive-alpha	1993	27	0.0001	TGTGCTTTCAAAGCTGCAGGCAACAAGCTAACTTTT	CAFKAAGNKLTF	TRAV38-2/DV8		TRAJ17	TRA
PBMC-Naive-alpha	1994	27	0.0001	TGCGCCGAGTCAGGAAACACACCTCTTGTCTTT	CAESGNTPLVF	TRAV1-1		TRAJ29	TRA
PBMC-Naive-alpha	1995	27	0.0001	TGTGCTGTTCTCTCAGGAAACACACCTCTTGTCTTT	CAVLSGNTPLVF	TRAV2		TRAJ29	TRA
PBMC-Naive-alpha	1996	27	0.0001	TGTGCTGTCGATTCAGGAAACACACCTCTTGTCTTT	CAVDSGNTPLVF	TRAV41		TRAJ29	TRA
PBMC-Naive-alpha	1997	27	0.0001	TGTGCTTTCACGGGCGGAGGAGGTGCTGACGGACTCACCTTT	CAFTGGGGADGLTF	TRAV38-1		TRAJ45	TRA
PBMC-Naive-alpha	1998	27	0.0001	TGTGCTGTGAGGCCCGGTTCTGCAAGGCAACTGACCTTT	CAVRPGSARQLTF	TRAV21		TRAJ22	TRA
PBMC-Naive-alpha	1999	27	0.0001	TGTGCTCTGAGCCTCCCCTACTCAGGAGGAGGTGCTGACGGACTCACCTTT	CALSLPYSGGGADGLTF	TRAV9-2		TRAJ45	TRA
[truncated: 66,531 more rows]
